# Supplementary material for: Fusarium head blight resistance in European winter wheat: insights from genome-wide transcriptome analysis
Source: BMC Genomics. 2021 Jun 24;22:470. doi: 10.1186/s12864-021-07800-1 (PMC8228913; doi:10.1186/s12864-021-07800-1)
Supplement: Supplementary file 3 — Additional file 3. [file 12864_2021_7800_MOESM3_ESM.xlsx]

## Sheet: Article
Online Resource 3
Article title:	Fusarium head blight resistance in European winter wheat: Insights from genome-wide transcriptome analysis
Journal:	BMC Genomics
Authors:	Maria Buerstmayr, Christian Wagner, Tetyana Nosenko, Jimmy Omony, Barbara Steiner, Thomas Nussbaumer, Klaus F.X. Mayer, Hermann Buerstmayr
Name, affiliation, and email of corresponding author:	Maria Buerstmayr, Department of Agrobiotechnology Tulln, BOKU-University of Natural Resources and Life Sciences-Vienna, Konrad Lorenz Str. 20, 3430 Tulln, Austria e-mail: maria.buerstmayr@boku.ac.at
Content:	Table S3 Gene Set Enrichment Analysis (GSEA) for Fusarium responsive genes (FRGs) for each resistance group, for each genotype and across all genotypes (see Table S2)

## Sheet: Table S3 
Table S3: Gene Set Enrichment Analysis (GSEA) for Fusarium responsive genes (FRGs) for each resistance group, for each genotype and across all genotypes
Gene Ontology				Sumai3												Resistant (R)												Moderate Resistant (MR)												Susceptible (SUS)
				up & down regultatedFR genes				up regultatedFR genes				down regultatedFR genes				up & down regultatedFR genes				up regultatedFR genes				down regultatedFR genes				up & down regultatedFR genes				up regultatedFR genes				down regultatedFR genes				up & down regultatedFR genes				up regultatedFR genes				down regultatedFR genes
GO ID	Domain	Term description	total gene counts	P.value	Odds.Ratio	expected gene counts	matched gene counts	P.value	Odds.Ratio	expected gene counts	matched gene counts	P.value	Odds.Ratio	expected gene counts	matched gene counts	P.value	Odds.Ratio	expected gene counts	matched gene counts	P.value	Odds.Ratio	expected gene counts	matched gene counts	P.value	Odds.Ratio	expected gene counts	matched gene counts	P.value	Odds.Ratio	expected gene counts	matched gene counts	P.value	Odds.Ratio	expected gene counts	matched gene counts	P.value	Odds.Ratio	expected gene counts	matched gene counts	P.value	Odds.Ratio	expected gene counts	matched gene counts	P.value	Odds.Ratio	expected gene counts	matched gene counts	P.value	Odds.Ratio
GO:0050832	BP	defense response to fungus	3795	0	4.63789	401.947	1224	7.52E-316	4.73743	393.509	1219					1.36E-321	4.50229	463.192	1342	0	4.61559	447.545	1326					0	4.54328	494.15	1416	0	4.59002	484.371	1403					0	4.50342	491.747	1404	0	4.55199	479.956	1387
GO:0071495	BP	cellular response to endogenous stimulus	7856	5.18718e-296	3.23811	843.481	1904	1.3868e-300	3.29054	825.844	1887					4.09E-315	3.17577	971.177	2126	5.29E-318	3.23032	938.538	2085					0	3.18752	1035.08	2249	0	3.22102	1014.93	2225					0	3.15184	1030.85	2227	0	3.19778	1006.34	2200
GO:0010200	BP	response to chitin	2550	0	6.15413	270.024	997	0	6.25396	264.364	991					0	6.30894	310.93	1112	0	6.44536	300.455	1099					0	6.29492	331.401	1158	0	6.38015	324.932	1151					0	6.19765	330.041	1146	0	6.2732	322.176	1135
GO:0002682	BP	regulation of immune system process	3632	4.98E-319	4.87292	381.285	1200	0	4.97529	373.288	1195					0	4.71493	439.077	1310	0	4.84765	424.279	1297					0	4.75125	468.103	1379	0	4.84579	458.964	1374					0	4.65564	465.87	1359	0	4.74395	454.759	1349
GO:0009607	BP	response to biotic stimulus	11291	5.68122e-255	2.81282	1047.91	2100	1.83409e-258	2.85384	1025.15	2076					1.87585e-282	2.80193	1211.91	2387	2.9422e-285	2.85008	1170.16	2336					9.39608e-299	2.8125	1294.06	2535	9.61705e-300	2.83661	1268.13	2502					1.10578e-287	2.76811	1287.28	2501	5.00563e-289	2.79734	1256.23	2462
GO:0009611	BP	response to wounding	3833	1.23556e-249	4.01494	411.541	1146	1.45379e-252	4.07495	402.935	1137					1.67874e-266	3.96594	473.845	1272	9.08811e-269	4.03424	457.919	1251					2.2004e-277	3.9742	505.024	1338	2.03456e-280	4.02699	495.19	1328					1.36862e-289	4.08478	502.957	1355	8.79514e-287	4.0941	490.999	1332
GO:0006955	BP	immune response	6959	3.49759e-253	3.18098	717.854	1634									1.93109e-265	3.09197	829.899	1821	2.53904e-271	3.16596	800.751	1791					1.85548e-280	3.10896	885.095	1930	8.99989e-284	3.14975	867.007	1911					1.95428e-264	3.02248	882.201	1893
GO:0023052	BP	signaling	11936	1.06826e-172	2.38344	1049.71	1901	4.3419e-175	2.41402	1026.09	1876					6.81591e-257	2.48841	1570.25	2793	2.87257e-263	2.54317	1517.48	2740					5.20443e-274	2.50591	1673.58	2970	9.36125e-280	2.54458	1640.99	2942					3.36093e-267	2.4824	1666.73	2944	1.65512e-272	2.52278	1627.1	2906
GO:0010817	BP	regulation of hormone levels	5942	1.0157e-246	3.28031	637.979	1503	2.89913e-249	3.32336	624.639	1488					1.29492e-273	3.29283	734.564	1697	7.34749e-270	3.39519	667.447	1589					1.44067e-284	3.2893	782.9	1788	5.99313e-282	3.29509	767.654	1761					2.51991e-268	3.27771	733.231	1682	1.84991e-268	3.3052	715.738	1657
GO:0051716	BP	cellular response to stimulus	18344	3.59448e-235	2.33217	1969.55	3196	1.76752e-238	2.36271	1928.37	3153					5.02088e-250	2.28188	2267.73	3609	1.54906e-253	2.32039	2191.51	3524					9.68859e-262	2.27736	2416.95	3826	9.74035e-266	2.30561	2369.88	3779					8.1179e-251	2.24224	2407.05	3783	3.22656e-255	2.27472	2349.83	3725
GO:0002679	BP	respiratory burst involved in defense response	790	6.35408e-236	12.2943	84.8205	460	7.98255e-239	12.5391	83.047	459					6.28394e-260	13.4444	97.6617	507	2.06343e-261	13.6202	94.3794	502					8.18321e-259	13.2518	104.088	518	6.84964e-262	13.4938	102.061	517					1.9029e-257	13.1661	103.662	516	4.56097e-258	13.2495	101.197	512
GO:0010363	BP	regulation of plant-type hypersensitive response	2203	2.79295e-223	5.07564	236.531	789	3.078e-227	5.17725	231.585	786					1.14148e-235	5.01056	272.34	867	4.67905e-240	5.13465	263.187	858					3.4943e-243	5.01469	290.261	907	2.97591e-248	5.12041	284.608	905					3.95424e-243	5.02053	289.072	905	4.38063e-246	5.10305	282.2	898
GO:0009753	BP	response to jasmonic acid	3658	4.72019e-210	3.72054	392.751	1047	2.67073e-212	3.77154	384.539	1038					2.74933e-218	3.6191	452.211	1153	2.73734e-222	3.69858	437.013	1137					3.29236e-225	3.60608	481.967	1210	1.39131e-228	3.65961	472.581	1202					1.36364e-237	3.7216	479.994	1229	5.5509e-236	3.73673	468.582	1209
GO:0006612	BP	protein targeting to membrane	2308	1.04853e-203	4.64771	247.805	782	1.39654e-207	4.74124	242.623	779					4.23936e-217	4.60946	285.32	864	3.46038e-220	4.7068	275.731	853					2.32159e-222	4.58538	304.095	902	2.5694e-227	4.68252	298.173	900					1.13736e-223	4.60925	302.85	902	1.11657e-226	4.68681	295.65	895
GO:0004675	MF	transmembrane receptor protein serine/threonine kinase activity	1864	6.65772e-195	5.14558	198.662	675	4.21945e-200	5.28015	194.517	675					3.27398e-198	4.95372	228.968	731	1.36223e-206	5.15676	221.227	730					7.32696e-212	5.08262	243.929	775	2.69181e-217	5.20667	239.262	775					7.97736e-202	4.92013	242.913	759	2.42628e-206	5.03512	237.094	756
GO:0009605	BP	response to external stimulus	11178	9.5339e-182	2.44565	1049.96	1921	4.85134e-183	2.47068	1027.24	1894					8.17021e-205	2.44862	1217.68	2202	1.27054e-202	2.46587	1174.85	2140	0.000252122	1.60778	59.6915	85	1.27358e-214	2.44412	1302.35	2338	3.79585e-213	2.45317	1275.38	2299					9.35752e-209	2.41948	1297.12	2316	1.17429e-205	2.42356	1264.92	2266	0.000244264	1.72375
GO:0072657	BP	protein localization to membrane	2399	1.61945e-192	4.38852	257.575	783	2.23599e-196	4.47737	252.189	780					4.08462e-205	4.34645	296.57	866	2.49831e-208	4.44039	286.603	855					1.05959e-209	4.31641	316.085	904	1.30145e-214	4.4083	309.93	902					5.44306e-211	4.3389	314.791	904	4.60443e-214	4.41333	307.307	897
GO:0031348	BP	negative regulation of defense response	2567	5.56263e-189	4.18281	275.613	810	1.17975e-193	4.27758	269.85	808					4.29544e-191	4.01035	317.339	880	1.93455e-196	4.1242	306.673	872					1.44682e-200	4.04361	338.22	928	1.42578e-205	4.13071	331.634	926					1.97009e-199	4.03509	336.835	924	4.16053e-202	4.09947	328.827	916
GO:0001653	MF	peptide receptor activity	1881	1.10695e-169	4.6691	200.474	642	1.71233e-174	4.79065	196.291	642					2.66582e-173	4.50675	231.056	698	4.44532e-181	4.69059	223.245	697					2.36197e-186	4.62973	246.154	742	2.0169e-191	4.74232	241.444	742					1.68123e-179	4.5232	245.129	730	1.01287e-183	4.62826	239.256	727
GO:0009737	BP	response to abscisic acid	2503	2.26529e-31	1.96929	247.727	433	3.33397e-31	1.97685	241.976	425					1.28602e-189	2.77697	719.235	1500	2.33035e-190	2.81189	695.063	1468					1.27046e-192	2.74286	766.562	1572	1.33505e-194	2.77198	751.634	1556					4.51028e-194	2.75554	763.424	1571	6.09686e-195	2.78139	745.273	1548
GO:0031625	MF	ubiquitin protein ligase binding	2024	1.01478e-164	4.39458	215.715	663	1.31403e-169	4.50934	211.214	663					1.73575e-169	4.25987	248.622	724	1.80585e-177	4.43483	240.216	723					1.82862e-180	4.34095	264.867	767	1.30124e-185	4.44684	259.8	767					1.05039e-172	4.22843	263.764	753	4.36061e-177	4.32861	257.445	750
GO:0005886	CC	plasma membrane	13958	6.9384e-159	2.13667	1460.07	2370	6.61251e-161	2.15944	1430.57	2339					1.13348e-169	2.09955	1684.97	2683	7.75766e-175	2.14254	1628.69	2629					5.87212e-177	2.09362	1796.48	2843	2.7725e-180	2.11892	1761.33	2810					3.53217e-169	2.06407	1787.06	2807	1.02419e-170	2.08397	1744.8	2760
GO:0007166	BP	cell surface receptor signaling pathway	2093	5.16575e-152	4.09781	224.721	659	3.78216e-156	4.19491	220.022	658					1.51825e-155	3.96071	258.742	719	1.25456e-162	4.11293	250.046	717					8.28823e-170	4.09036	275.767	769	2.43467e-174	4.18275	270.397	768					1.3563e-157	3.91651	274.638	747	3.24833e-161	3.99976	268.109	743
GO:0046777	BP	protein autophosphorylation	2672	4.88795e-152	3.6202	286.887	767	1.16615e-155	3.69408	280.888	764					2.08118e-159	3.54427	330.319	847	4.90059e-166	3.66504	319.217	842					6.71504e-168	3.57385	352.055	895	1.20672e-173	3.66393	345.199	895					9.28229e-160	3.4825	350.613	878	2.25865e-164	3.56362	342.277	874
GO:0009697	BP	salicylic acid biosynthetic process	1668	5.083e-142	4.48457	177.204	556	3.78151e-144	4.56071	173.493	553					1.46201e-161	4.64273	204.103	630	4.27205e-165	4.76282	197.234	624					8.32438e-164	4.59105	217.553	655	5.41402e-167	4.6787	213.311	653					2.01773e-163	4.5898	216.661	653	6.36662e-165	4.65265	211.503	647
GO:0009816	BP	defense response to bacterium. incompatible interaction	1012	4.34953e-149	6.38028	108.656	427	1.73702e-152	6.54169	106.384	427					3.12362e-155	6.29206	125.106	464	1.46153e-159	6.50134	120.901	462					5.78474e-164	6.45656	133.338	489	1.3774e-167	6.61193	130.742	489					1.10681e-156	6.22838	132.792	479	2.19341e-159	6.35957	129.635	477
GO:0043069	BP	negative regulation of programmed cell death	1170	1.53824e-155	5.93841	125.62	472	1.80673e-158	6.06698	122.994	471					3.57379e-162	5.84849	144.638	514	8.61212e-165	5.98523	139.777	509					1.05728e-166	5.85931	154.156	536	1.31401e-170	6.00104	151.154	536					2.75487e-168	5.90972	153.525	537	9.70718e-171	6.01999	149.874	534
GO:0000165	BP	MAPK cascade	1514	7.79425e-144	4.9971	149.87	506	2.84855e-146	5.09217	146.722	504					2.03641e-153	4.97817	172.521	558	9.79433e-157	5.10916	166.695	553					2.00247e-154	4.90159	183.867	578	4.2837e-157	4.9904	180.269	576					1.40362e-154	4.91117	183.111	577	2.35564e-155	4.96526	178.736	571
GO:0009862	BP	systemic acquired resistance. salicylic acid mediated signaling pathway	1449	6.46105e-137	4.73149	155.576	507	2.46004e-139	4.82156	152.323	505					2.83235e-150	4.79759	179.129	566	3.17379e-150	4.85023	173.109	556					6.81764e-151	4.71551	190.916	586	3.13473e-152	4.77249	187.198	582					4.2975e-153	4.76774	190.134	588	5.60686e-154	4.82225	185.614	582
GO:0006820	BP	anion transport	1721	7.69786e-149	3.56648	288.405	764	4.25766e-148	3.58381	282.233	753					3.62064e-150	3.41912	331.935	833	1.25392e-149	3.45107	320.654	815					3.19023e-150	3.35096	354.089	866	2.30532e-149	3.36174	347.058	854					1.21332e-154	3.40742	352.495	872	3.57346e-151	3.39227	344.075	853
GO:0097306	BP	cellular response to alcohol	2220													8.09419e-144	3.69616	269.488	718	2.62961e-146	3.77496	260.213	708					1.49153e-145	3.64674	287.182	748	1.60874e-146	3.68357	281.426	741					1.33861e-148	3.69309	286.261	752	3.29524e-151	3.75865	279.321	746
GO:0071310	BP	cellular response to organic substance	8650	9.03944e-219	2.85687	794.721	1673	3.56484e-222	2.89983	777.543	1656					5.58088e-136	2.79132	473.131	1023	6.9112e-135	2.81392	455.861	996					4.5416e-145	2.81593	505.521	1089	1.48599e-145	2.83884	494.833	1075					1.17621e-141	2.7886	503.826	1079	4.89015e-141	2.80589	490.597	1059
GO:0009867	BP	jasmonic acid mediated signaling pathway	1965	3.34477e-131	4.20392	181.903	548	2.55265e-133	4.27665	178.052	545					1.42406e-134	4.07038	209.561	598	3.15245e-137	4.16523	202.434	591					3.30586e-140	4.08856	223.49	629	5.77942e-142	4.14532	219.089	625					2.16396e-142	4.13302	222.49	631	1.27832e-142	4.16875	217.139	623
GO:0006952	BP	defense response	4326	3.18418e-174	2.57701	824.588	1605	1.29457e-33	2.25459	166.59	330					1.65838e-128	2.29628	799.779	1455	3.26887e-127	2.31527	767.701	1409					1.17537e-133	2.28587	855.131	1542	9.91382e-131	2.28275	834.63	1507					2.84046e-126	2.23928	853.443	1519	3.31237e-32	2.14835	191.464	359
GO:0004713	MF	protein tyrosine kinase activity	2249	8.19835e-110	3.32333	238.767	609	6.86472e-114	3.41016	233.75	609					5.06279e-117	3.2799	275.355	678	2.4843e-123	3.40729	265.984	676					7.51392e-132	3.4235	293.433	733	7.54521e-136	3.49969	287.784	732					3.15047e-119	3.25235	292.137	707	4.86479e-123	3.33013	285.092	704
GO:0009719	BP	response to endogenous stimulus	826	2.14602e-105	6.29579	68.3796	289	1.11442e-105	6.37209	66.6983	286					7.42151e-129	6.91775	79.791	340	1.07655e-129	7.05627	76.7261	335	0.000136649	1.64778	57.7678	84	8.63358e-136	7.04318	85.4149	359	5.42164e-138	7.19339	83.5403	358					3.61229e-129	6.76467	85.3554	351	2.08449e-130	6.88528	82.9898	348
GO:0009723	BP	response to ethylene	2245	7.69139e-116	3.40405	241.041	624	7.14529e-118	3.45937	236.001	620					7.89339e-127	3.41093	277.532	700	4.29479e-130	3.49487	268.205	692					5.11072e-131	3.40301	295.794	735	1.90011e-133	3.45716	290.034	731					2.60326e-129	3.3836	294.583	730	1.00809e-132	3.45608	287.58	726
GO:0006979	BP	response to oxidative stress	2011	3.3578e-136	4.09769	196.755	584	6.8754e-139	4.17939	192.308	581					3.53962e-131	3.81841	226.984	624	3.3873e-132	3.88178	218.875	613					6.36935e-129	3.70508	241.838	643	6.78692e-130	3.74561	236.809	637					1.00464e-130	3.73793	241.082	645	4.50163e-132	3.7904	235.007	638
GO:0010310	BP	regulation of hydrogen peroxide metabolic process	1136	5.36586e-124	5.15163	121.97	422	9.21933e-126	5.24046	119.419	420					4.4268e-135	5.21801	140.435	469	4.86681e-135	5.2742	135.715	461					4.44425e-132	5.03611	149.676	480	2.56289e-133	5.09957	146.761	477					2.25285e-131	5.0234	149.063	478	6.24795e-132	5.07531	145.519	473
GO:0080167	BP	response to karrikin	1731	1.05677e-125	4.05731	185.854	546	2.6695e-125	4.07946	181.967	539					4.90405e-130	3.94968	213.99	598	1.28658e-126	3.93153	206.798	581					2.93726e-127	3.82357	228.071	615	1.50484e-126	3.83422	223.63	607					4.96501e-131	3.89421	227.138	620	1.71434e-126	3.84331	221.737	604	0.000122551	3.14124
GO:0042742	BP	defense response to bacterium	3660	3.8304e-122	3.06438	320.624	766	3.3907e-124	3.12423	310.66	755					5.65874e-123	2.93504	370.562	841	7.15397e-124	2.97815	357.51	824					1.69441e-120	2.85126	395.342	871	1.61715e-122	2.89084	387.303	864					2.30801e-130	2.95975	394.444	891	6.6024e-130	2.97748	384.655	876
GO:0071229	BP	cellular response to acid chemical	3722	5.27044e-19	2.09843	111.495	209	1.42137e-19	2.13395	108.712	207					4.4198e-122	2.76481	426.243	923	2.01441e-123	2.81015	410.767	904					1.6152e-129	2.78258	455.507	981	6.70096e-129	2.79454	445.827	966					5.57736e-121	2.70417	452.975	958	9.96846e-124	2.75225	441.325	948
GO:0007169	BP	transmembrane receptor protein tyrosine kinase signaling pathway	1415	9.7695e-108	4.134	151.925	455	5.37806e-111	4.23904	148.749	455					2.86794e-107	3.93713	174.926	491	2.91348e-112	4.08906	169.047	490					1.38692e-117	4.07813	186.436	526	4.53992e-121	4.17672	182.806	526					1.20147e-111	3.95788	185.673	515	1.45321e-114	4.04913	181.258	513
GO:0009751	BP	response to salicylic acid	1530	3.29695e-108	4.08563	152.083	458	7.26409e-107	4.08976	148.594	450					3.77186e-120	4.13592	175.674	516	1.03447e-119	4.17831	169.32	505					3.39469e-131	4.27007	187.712	553	1.98748e-131	4.30454	183.738	547					2.8573e-122	4.09748	186.672	537	1.43697e-119	4.077	181.889	525
GO:0030246	MF	carbohydrate binding	1699	5.32425e-100	3.63277	178.118	489	7.37908e-103	3.71621	174.315	488					1.46677e-109	3.64715	205.043	548	1.75962e-113	3.76127	198.016	544					1.82749e-115	3.68197	218.492	579	3.5203e-119	3.77149	214.236	579					6.08683e-111	3.60396	217.862	570	3.31268e-113	3.6724	212.573	566
GO:0016772	MF	transferase activity. transferring phosphorus-containing groups	7171	2.49573e-93	2.07428	750.688	1291	4.39311e-97	2.11409	734.628	1282					4.05015e-102	2.06113	866.302	1466	1.5871e-109	2.12961	836.415	1451					3.16856e-111	2.08822	922.779	1566	4.65943e-116	2.12943	904.698	1558					4.60337e-98	2.00463	919.801	1520	1.23424e-103	2.05334	897.359	1510
GO:0033037	BP	polysaccharide localization	1452	3.42712e-108	4.0861	155.898	463	1.23476e-109	4.14825	152.638	460					8.48899e-111	3.95644	179.5	505	1.62738e-113	4.0576	173.467	500					3.37954e-114	3.94941	191.311	529	7.53652e-116	4.00731	187.586	526					1.61392e-115	3.98152	190.528	530	9.76858e-117	4.03624	185.998	525
GO:0006468	BP	protein phosphorylation	4118	6.4705e-92	2.465	412.15	833	9.78991e-95	2.51229	402.717	827					8.48209e-106	2.50011	476.802	957	2.85474e-110	2.57076	459.312	944					4.40375e-116	2.54983	508.66	1026	2.18119e-119	2.59617	497.666	1019					4.93407e-104	2.44035	507.41	994	1.85285e-107	2.49038	494.292	985
GO:0043449	BP	cellular alkene metabolic process	588	1.85187e-95	6.74699	63.1323	259	1.60572e-97	6.91389	61.8122	259					3.16731e-111	7.35875	72.69	295	4.38921e-115	7.66054	70.247	295					5.81667e-117	7.57374	77.4731	310	2.66609e-119	7.75256	75.9644	310					1.00242e-103	6.81073	77.1559	294	2.15615e-106	7.00754	75.3215	294
GO:1900674	BP	olefin biosynthetic process	588	1.85187e-95	6.74699	63.1323	259	1.60572e-97	6.91389	61.8122	259					3.16731e-111	7.35875	72.69	295	4.38921e-115	7.66054	70.247	295					5.81667e-117	7.57374	77.4731	310	2.66609e-119	7.75256	75.9644	310					1.00242e-103	6.81073	77.1559	294	2.15615e-106	7.00754	75.3215	294
GO:0046394	BP	carboxylic acid biosynthetic process	4793	9.84822e-100	2.14082	723.391	1276	6.55644e-101	2.16167	708.357	1260					1.48141e-107	2.11886	832.483	1440	3.15999e-108	2.14163	805.086	1407					4.39633e-133	2.57225	589.263	1180	2.98615e-114	2.13932	870.66	1509					1.84816e-130	2.55318	587.349	1171	7.21457e-132	2.58178	573.744	1156
GO:0012501	BP	programmed cell death	3402	2.71228e-104	2.76133	347.788	769	1.35771e-106	2.8079	340.069	763					2.38982e-102	2.62244	401.927	841	2.33725e-107	2.70505	387.8	833					8.32336e-107	2.6213	428.971	889	1.88374e-109	2.66474	420.091	883					1.70662e-107	2.63182	427.054	888	1.68948e-109	2.67199	416.408	878
GO:0009693	BP	ethylene biosynthetic process	582	1.85187e-95	6.74699	63.1323	259	1.60572e-97	6.91389	61.8122	259					3.16731e-111	7.35875	72.69	295	4.38921e-115	7.66054	70.247	295					2.34332e-113	7.42715	76.6383	304	1.20853e-115	7.60251	75.1449	304					4.60974e-101	6.71775	76.3329	289	1.11423e-103	6.91187	74.517	289
GO:0050778	BP	positive regulation of immune response	1270	7.27958e-104	4.29594	136.357	420	2.92915e-106	4.3882	133.506	419					2.08767e-102	4.0669	157	451	1.00118e-105	4.19147	151.724	448					3.32593e-107	4.10019	167.331	475	9.9796e-110	4.1841	164.073	474					2.2219e-102	3.99243	166.646	466	6.7137e-105	4.0811	162.684	464
GO:0044550	BP	secondary metabolite biosynthetic process	2656	3.9775e-99	2.98658	272.146	641	7.03125e-99	2.9455	279.206	652					6.58397e-107	2.96469	313.079	717	9.84831e-101	2.92235	300.147	685	2.07023e-05	2.61457	11.035	27	3.79964e-114	3.00148	333.879	762	4.55162e-109	2.95389	327.353	742	1.80576e-05	3.19949	6.81462	20	1.60278e-117	3.04786	332.47	767	1.79798e-110	2.9793	324.573	741	8.17549e-08	3.61116
GO:0031349	BP	positive regulation of defense response	1349	1.46663e-103	4.21779	140.359	427	3.57805e-109	4.48713	132.174	421					5.42033e-101	3.96733	161.649	457	2.2177e-104	4.09017	156.207	454					1.76933e-105	3.99237	172.284	481	4.95753e-108	4.0746	168.924	480					2.37045e-101	3.90357	171.578	473	6.31746e-104	3.99118	167.492	471
GO:0010224	BP	response to UV-B	1515	4.33002e-102	3.86255	162.662	465	1.47194e-103	3.92213	159.261	462					1.10821e-96	3.58033	187.288	494	2.01463e-100	3.69559	180.993	491					7.81222e-106	3.69309	199.612	529	6.44838e-107	3.73661	195.725	525					1.85096e-101	3.61103	198.795	520	8.56027e-104	3.68394	194.068	517
GO:0005516	MF	calmodulin binding	1518	2.29548e-95	3.72458	161.786	452	1.37516e-95	3.75599	158.41	447					4.69301e-94	3.53135	186.467	488	3.44108e-97	3.63407	180.162	484					1.08665e-102	3.63565	198.65	522	3.02928e-104	3.68791	194.85	519					2.82803e-97	3.53272	197.823	511	1.87709e-98	3.58222	193.084	506
GO:0052544	BP	defense response by callose deposition in cell wall	1024	6.36245e-95	4.60495	109.945	356	3.38601e-96	4.67832	107.646	354					5.37926e-94	4.36996	126.589	382	1.63797e-96	4.49238	122.335	379					2.51459e-98	4.41066	134.919	402	4.40771e-99	4.45884	132.292	399					1.33939e-97	4.39506	134.367	400	1.2049e-97	4.42849	131.172	395
GO:0004383	MF	guanylate cyclase activity	889	1.00722e-92	4.96057	94.7483	323	3.87258e-95	5.08406	92.7714	323					8.26409e-90	4.63543	109.202	343	3.07472e-93	4.80422	105.51	342					1.63868e-97	4.80453	116.337	366	5.39824e-100	4.9166	114.112	366					5.70451e-92	4.62451	115.853	357	1.25511e-93	4.7144	113.077	355
GO:0005524	MF	ATP binding	9653	2.19975e-78	1.82649	1028.8	1584	6.66301e-82	1.85871	1007.34	1571					1.12221e-85	1.8151	1185.75	1802	1.47424e-93	1.8762	1145.66	1783					1.11128e-92	1.83087	1263.22	1922	1.57732e-97	1.86605	1239.05	1911					5.25002e-84	1.78267	1257.96	1882	2.04265e-89	1.82339	1227.82	1867
GO:0045088	BP	regulation of innate immune response	1363	3.60708e-92	4.38376	112.105	358	2.16344e-94	4.48568	109.521	357					5.03427e-90	4.10986	129.85	384	5.89566e-93	4.24203	125.112	381					1.13279e-93	4.12148	138.637	404	5.45815e-96	4.21217	135.673	403					1.66522e-87	3.96197	138.102	393	1.0841e-89	4.05373	134.553	391
GO:0009505	CC	plant-type cell wall	3027	5.61134e-95	2.7381	320.903	707	4.23027e-95	2.75675	314.443	698					1.36456e-95	2.6356	368.849	776	4.56413e-91	2.60717	356.456	748	5.81495e-05	2.41119	12.3931	28	1.20391e-96	2.60125	393.152	812	6.86479e-94	2.58341	385.593	795					2.7571e-93	2.56522	391.79	802	2.60278e-90	2.5475	382.473	782
GO:0009407	BP	toxin catabolic process	1008	3.314e-89	4.46918	108.227	344	9.73607e-90	4.51845	105.964	341					1.94035e-94	4.42458	124.611	379	6.41616e-97	4.54774	120.423	376					4.8334e-95	4.35697	132.811	393	9.62208e-96	4.40347	130.225	390					3.10136e-96	4.39732	132.267	394	3.52116e-98	4.48699	129.123	392
GO:0009414	BP	response to water deprivation	4380	4.44e-92	2.58104	362.629	762	1.11745e-91	2.59326	354.792	750					1.42791e-96	2.52604	418.16	850	4.18113e-94	2.52438	403.671	824					8.59157e-96	2.47336	446.106	886	9.30882e-94	2.46525	437.341	869					1.91276e-94	2.46213	444.198	880	1.07202e-92	2.46001	433.422	861
GO:0010193	BP	response to ozone	747	3.73231e-86	5.26402	80.2037	284	2.61963e-88	5.39469	78.5267	284					1.78318e-88	5.12348	92.3459	308	8.78251e-91	5.27379	89.2423	306					1.29684e-95	5.31515	98.4224	328	6.24658e-98	5.44091	96.5058	328					7.84048e-87	4.96658	98.0195	315	8.37367e-89	5.08178	95.6891	314
GO:0030968	BP	endoplasmic reticulum unfolded protein response	914	1.30745e-81	4.4776	98.1341	313	1.43692e-82	4.54327	96.0822	311					3.98902e-89	4.52399	112.991	349	2.94584e-93	4.71076	109.193	349					7.74872e-90	4.46012	120.426	362	2.76209e-92	4.56605	118.081	362					1.25033e-95	4.65338	119.933	370	2.25523e-97	4.74437	117.081	368
GO:0009506	CC	plasmodesma	6075	4.70159e-85	2.09141	644.032	1128	2.9491e-87	2.12075	631.067	1118					5.42518e-80	1.98128	740.258	1234	1.38578e-81	2.00992	715.386	1208					7.15832e-84	1.98174	789.032	1308	2.34426e-85	2.0018	773.862	1294					5.3893e-79	1.94648	786.298	1288	2.35579e-79	1.95986	767.6	1266
GO:0030054	CC	cell junction	6102	3.50369e-84	2.0817	646.895	1129	2.19069e-86	2.11096	633.872	1119					6.15734e-80	1.97859	743.548	1238	1.45458e-81	2.00743	718.565	1212					9.74068e-84	1.97847	792.539	1312	3.058e-85	1.99861	777.301	1298					7.07611e-79	1.94339	789.793	1292	2.91772e-79	1.95693	771.011	1270
GO:0030554	MF	adenyl nucleotide binding	10541	2.50571e-67	1.72294	1123.44	1652	1.84393e-70	1.75155	1100	1637					2.50522e-74	1.71712	1294.82	1885	7.60801e-82	1.77429	1251.05	1864					5.72002e-82	1.7394	1379.43	2017	1.93201e-86	1.77141	1353.04	2004					6.52377e-74	1.69477	1373.68	1976	1.57828e-78	1.72973	1340.77	1957
GO:0006986	BP	response to unfolded protein	956	3.54441e-76	4.18223	102.644	313	3.78019e-77	4.2445	100.497	311					1.47187e-83	4.22761	118.183	350	1.27444e-87	4.40218	114.211	350					1.21292e-84	4.17986	125.96	364	4.67241e-87	4.27916	123.507	364					3.3551e-90	4.35615	125.444	372	5.8282e-92	4.4426	122.462	370
GO:0005576	CC	extracellular region	7127	4.9329e-87	2.03194	745.629	1264	1.36546e-82	2.00775	731.103	1231	5.72622e-06	2.50575	18.1368	38	9.67318e-86	1.95473	857.137	1400	8.55298e-80	1.92572	831.076	1347	3.22627e-07	2.36776	25.1578	52	3.19508e-97	2.00291	915.241	1511	9.52147e-93	1.98126	899.113	1476	7.865e-06	2.5307	16.1281	35	3.09702e-85	1.924	911.075	1465	1.017e-77	1.8805	891.422	1414	1.10346e-10	3.2226
GO:0035967	BP	cellular response to topologically incorrect protein	959	8.35888e-76	4.1626	102.966	313	8.89885e-77	4.22464	100.813	311					3.92719e-83	4.20657	118.554	350	3.44923e-87	4.38027	114.569	350					3.37643e-84	4.15858	126.355	364	1.31228e-86	4.25737	123.894	364					9.74907e-90	4.33366	125.838	372	1.69436e-91	4.41975	122.846	370
GO:0020037	MF	heme binding	1276	7.99607e-82	3.74032	135.994	383	1.47124e-81	3.75999	133.157	378					1.51747e-85	3.66338	156.74	422	3.82471e-81	3.59613	151.441	406	0.000104374	3.16797	5.29921	16	1.00952e-89	3.69134	166.981	445	3.96287e-85	3.60487	163.787	432	2.25208e-05	4.35779	3.19456	13	7.42253e-81	3.48861	166.286	428	7.62066e-81	3.51357	162.302	422
GO:0070727	BP	cellular macromolecule localization	6565	1.34643e-84	2.03905	704.869	1205	5.13271e-88	2.07701	690.131	1197					3.50991e-79	1.93081	811.581	1321	2.94843e-83	1.97667	784.305	1301					3.47457e-83	1.93232	864.984	1401	1.26904e-86	1.96543	848.14	1392					1.02078e-82	1.93075	861.443	1395	3.9458e-85	1.95858	840.962	1378
GO:0052386	BP	cell wall thickening	1192	1.03897e-79	3.80851	127.982	365	1.79558e-80	3.85614	125.306	362					7.62874e-78	3.59358	147.358	392	1.92179e-80	3.6986	142.405	389					6.44423e-82	3.62695	157.054	414	7.82195e-83	3.67104	153.996	411					2.43406e-81	3.617	156.411	412	1.08023e-81	3.65182	152.693	407
GO:0010941	BP	regulation of cell death	1324	5.23927e-78	3.64473	133.47	373	4.61105e-79	3.70025	130.444	370					2.89932e-81	3.55167	154.598	412	7.92913e-84	3.65469	149.059	408					4.85902e-84	3.54464	165.043	433	2.57756e-85	3.59747	161.561	430					1.09718e-84	3.56461	164.271	433	1.96087e-85	3.61026	160.117	428
GO:0009738	BP	abscisic acid-activated signaling pathway	1432	5.17587e-69	2.9229	190.206	449	9.35081e-79	3.52573	144.187	393					1.9803e-83	3.44491	170.241	442	1.49555e-83	3.48687	164.204	433					6.03762e-83	3.3681	181.481	458	2.90553e-83	3.39613	177.734	453					1.48138e-77	2.90269	233.332	530	1.38128e-87	3.49722	176.385	459
GO:0019899	MF	enzyme binding	2308	2.86201e-73	2.72629	242.562	539	3.86049e-76	2.7909	237.373	538					3.46949e-74	2.6294	279.948	594	3.85335e-79	2.73112	270.292	592					1.22226e-79	2.66414	298.057	632	2.83942e-82	2.71715	292.215	630					1.83075e-78	2.64925	297.164	628	1.24443e-80	2.69918	289.913	623
GO:0071396	BP	cellular response to lipid	2812													1.09904e-84	2.58609	338.119	705	2.08034e-84	2.60854	326.355	688					4.30941e-84	2.5338	360.313	734	1.13715e-83	2.54263	353.012	723					1.27257e-84	2.54223	359.353	734	2.65371e-86	2.5807	350.509	726
GO:0010583	BP	response to cyclopentenone	730	5.48514e-74	4.81842	78.3785	263	1.49127e-74	4.87769	76.7396	261					1.16283e-83	5.00273	90.2443	297	5.29136e-83	5.02872	87.2114	291					7.53661e-84	4.91562	96.1826	307	3.47418e-83	4.91697	94.3096	303					5.48228e-85	4.96812	95.7888	308	8.65264e-85	4.99547	93.5114	304
GO:0010231	BP	maintenance of seed dormancy	482	2.98303e-73	6.35499	51.7513	206	7.19263e-75	6.51111	50.6692	206					7.1241e-75	6.18889	59.586	222	7.11367e-77	6.38615	57.5834	221					3.78315e-83	6.63014	63.5069	239	6.59639e-85	6.78554	62.2702	239					4.88599e-77	6.22753	63.2469	231	1.09148e-76	6.24592	61.7432	228
GO:0002376	BP	immune system process	5135	2.5125e-76	6.70106	45.4836	199	1.72555e-133	2.74153	473.788	1022					1.43668e-80	6.60906	53.1684	219	1.20191e-80	6.70984	51.0095	215					4.71193e-84	6.68909	56.8095	230	2.81416e-85	6.82131	55.473	229					4.39372e-79	6.36782	56.8609	224	5.60614e-136	2.58379	585.635	1185
GO:0009555	BP	pollen development	2592	1.64569e-75	2.63297	275.09	593	3.24089e-75	2.64539	269.245	584					1.33485e-82	2.62522	317.271	669	3.51505e-82	2.64518	306.496	653					2.61388e-84	2.60187	338.246	702	4.33461e-83	2.59977	331.637	690					1.0251e-77	2.51759	336.871	684	3.93719e-78	2.53965	328.771	674
GO:0071496	BP	cellular response to external stimulus	2577	8.39913e-80	2.71478	270.469	596	5.48581e-79	2.71994	264.799	586					1.76878e-82	2.64359	311.454	660	1.79548e-81	2.65523	300.959	643					3.99521e-81	2.57963	331.965	685	1.17507e-80	2.58705	325.484	675					8.19077e-80	2.56477	330.639	680	2.6129e-79	2.57465	322.759	668
GO:0010089	BP	xylem development	1328	6.75577e-80	3.60769	142.584	391	7.36564e-81	3.6567	139.603	388					1.8801e-74	3.32455	164.171	414	1.16951e-75	3.38751	158.653	408					3.22992e-80	3.39306	174.973	441	3.00262e-80	3.4134	171.566	436					5.95663e-73	3.23262	174.257	426	1.65343e-73	3.26804	170.114	421
GO:0072593	BP	reactive oxygen species metabolic process	2381	1.24704e-83	2.83459	255.643	582	1.57301e-83	2.85146	250.297	574					7.29294e-85	2.73711	294.345	640	4.42707e-83	2.7382	284.452	622					1.84758e-81	2.64155	313.713	659	6.04465e-80	2.63436	307.604	647					7.67389e-79	2.60774	312.429	651	1.64195e-78	2.62012	305.001	640
GO:0010035	BP	response to inorganic substance	6497	3.02376e-80	2.08285	614.411	1073	2.64558e-81	2.10415	601.079	1059					3.94837e-82	2.02273	711.329	1203	2.87323e-82	2.04156	686.556	1172					9.7776e-88	2.03421	759.457	1282	1.93121e-85	2.02672	743.95	1255					1.36949e-84	2.01159	757.282	1269	1.28338e-84	2.02365	738.939	1246
GO:0044283	BP	small molecule biosynthetic process	8178	6.93593e-71	1.85944	825.595	1309	8.44892e-72	1.87548	808.313	1291					4.65477e-77	1.84574	951.237	1486	8.59653e-76	1.85084	919.059	1442					5.14172e-82	1.85378	1013.32	1580	3.82062e-80	1.84927	993.534	1549					2.3037e-78	1.83103	1009.79	1562	6.33565e-78	1.83756	985.575	1531
GO:0009627	BP	systemic acquired resistance	1987	7.11195e-65	2.93364	175.365	417	3.24344e-66	2.98272	171.453	414					1.55776e-70	2.91882	202.541	469	1.37203e-72	2.99021	195.443	463					3.11171e-77	2.98857	216.22	503	2.43614e-79	3.04581	211.816	501					2.76416e-71	2.88146	215.313	489	6.07337e-74	2.9527	209.951	487
GO:0006796	BP	phosphate-containing compound metabolic process	12311	4.02365e-64	1.62456	1483.07	2052	1.74362e-66	1.64549	1452.06	2027					5.58363e-71	1.62497	1677.85	2310	3.35694e-75	1.65864	1621.17	2264					1.50915e-76	1.66916	1587.34	2233	1.21069e-79	1.69244	1555.81	2210					1.23081e-66	1.58424	1780.86	2407	3.04341e-70	1.61045	1738.31	2376
GO:0097367	MF	carbohydrate derivative binding	11424	2.61202e-57	1.63776	1197.31	1693	2.57867e-60	1.66519	1171.98	1677					2.99579e-64	1.63784	1382.19	1941	3.41223e-71	1.69107	1334.88	1917					5.1525e-71	1.658	1473.28	2078	8.68257e-76	1.6914	1444.76	2066					3.9217e-64	1.61926	1467.24	2039	6.65425e-69	1.65475	1431.68	2020
GO:0009963	BP	positive regulation of flavonoid biosynthetic process	756	1.11571e-67	4.454	81.17	259	6.73123e-69	4.53673	79.4728	258					7.18467e-69	4.30325	93.4585	281	7.70258e-71	4.42773	90.3175	279					2.20573e-79	4.62894	99.6083	307	8.42936e-81	4.71168	97.6686	306					1.73843e-78	4.59954	99.2005	305	1.11056e-79	4.6796	96.842	303
GO:0043436	BP	oxoacid metabolic process	11136	1.16991e-66	1.75112	1021.39	1528	8.26367e-67	1.76012	1000.11	1503					3.57936e-108	1.88207	1376.66	2115	2.85543e-76	1.77483	1137.21	1706									3.17793e-80	1.76995	1230.15	1833	0.000544682	1.82922	28.5722	46	3.05164e-78	1.75264	1248.68	1847	8.59687e-77	1.75219	1220.02	1807
GO:0071383	BP	cellular response to steroid hormone stimulus	1190	7.73155e-71	3.57195	127.768	349	1.22993e-72	3.646	125.096	348					7.52024e-69	3.36653	147.111	375	3.07371e-71	3.46369	142.166	372					5.19599e-75	3.45822	156.791	401	5.95546e-77	3.52695	153.738	400					4.15909e-68	3.28934	156.149	387	6.24261e-70	3.35864	152.436	385
GO:0009636	BP	response to toxic substance	1359	1.04395e-06	2.08502	33.1249	62	6.49744e-75	3.50802	138.546	376					4.84326e-78	3.40076	163.3	420	2.00097e-79	3.47022	157.661	414					1.9782e-76	3.30001	174.048	433	1.62915e-76	3.32171	170.567	428					6.97964e-78	3.33555	173.519	435	5.43617e-77	3.34002	169.285	427
GO:1900459	BP	positive regulation of brassinosteroid mediated signaling pathway	412	5.84021e-66	6.58689	44.2355	180	2.2163e-67	6.74816	43.3106	180					2.24061e-68	6.49684	50.9324	195	4.9334e-70	6.69383	49.2207	194					5.44101e-76	6.98989	54.2839	210	1.50849e-77	7.15323	53.2268	210					4.68446e-68	6.36538	54.0616	200	5.01218e-69	6.48334	52.7763	199
GO:0002221	BP	pattern recognition receptor signaling pathway	409	1.46005e-65	6.68207	43.1311	177	5.79146e-67	6.84572	42.2285	177					3.25107e-68	6.61408	49.6602	192	7.78564e-70	6.81315	47.9899	191					5.21762e-76	7.14144	52.9307	207	1.50034e-77	7.30839	51.8991	207					5.53887e-68	6.48771	52.7138	197	6.317e-69	6.60644	51.4596	196
GO:0002757	BP	immune response-activating signal transduction	409	1.46005e-65	6.68207	43.1311	177	5.79146e-67	6.84572	42.2285	177					3.25107e-68	6.61408	49.6602	192	7.78564e-70	6.81315	47.9899	191					5.21762e-76	7.14144	52.9307	207	1.50034e-77	7.30839	51.8991	207					5.53887e-68	6.48771	52.7138	197	6.317e-69	6.60644	51.4596	196
GO:0032555	MF	purine ribonucleotide binding	11148	3.73994e-54	1.61719	1188.14	1668	3.86879e-57	1.64453	1163.35	1653					1.0403e-60	1.6179	1369.39	1910	2.10256e-67	1.66991	1323.09	1887					1.40659e-67	1.64038	1458.86	2046	4.50777e-72	1.6724	1430.95	2034					1.20562e-60	1.60047	1452.79	2006	4.3642e-65	1.63423	1417.98	1987
GO:0010045	BP	response to nickel cation	465	2.66783e-65	6.63349	43.2266	177	1.04171e-66	6.79688	42.3165	177					7.37126e-68	6.55444	49.8095	192	1.71272e-69	6.75346	48.1254	191					1.42099e-75	7.06706	53.1069	207	4.0385e-77	7.233	52.0669	207					1.36123e-67	6.42498	52.8883	197	1.51742e-68	6.54384	51.6237	196
GO:0010043	BP	response to zinc ion	820	9.33645e-66	4.17477	88.0416	269	1.13631e-67	4.27821	86.2007	269					1.59326e-68	4.09095	101.37	295	1.19367e-70	4.21268	97.9634	293					6.32028e-72	4.13419	108.041	311	2.37557e-73	4.20941	105.937	310					1.7067e-64	3.87495	107.598	298	3.00164e-66	3.96551	105.04	297
GO:0007178	BP	transmembrane receptor protein serine/threonine kinase signaling pathway	895	1.11246e-61	3.83295	96.0942	277	1.34502e-63	3.92803	94.0849	277					3.39499e-65	3.78343	110.642	306	5.09961e-68	3.91879	106.924	305					9.81777e-70	3.86015	117.922	325	7.85812e-72	3.95149	115.626	325					1.60324e-65	3.72725	117.44	317	7.89034e-67	3.79692	114.648	315
GO:0006182	BP	cGMP biosynthetic process	414	3.93728e-63	6.3373	44.4503	177	1.6144e-64	6.49239	43.5208	177					1.59298e-65	6.25003	51.1797	192	3.83712e-67	6.4396	49.4596	191					5.4354e-73	6.72076	54.5474	207	1.62435e-74	6.87776	53.4852	207					3.2224e-65	6.12283	54.3241	197	3.63515e-66	6.23644	53.0325	196
GO:0015706	BP	nitrate transport	1263	1.40632e-71	3.5032	133.79	361	4.04136e-69	3.46356	130.934	352					2.06235e-73	3.39401	154.373	396	1.06544e-69	3.3383	149.088	381					7.04083e-75	3.36502	164.571	414	1.08547e-72	3.33242	161.308	405					2.24828e-74	3.35723	163.867	412	4.3154e-69	3.25408	159.917	396
GO:0005509	MF	calcium ion binding	1701	2.34466e-69	3.00058	181.29	435	1.15942e-69	3.02665	177.507	430					2.67884e-68	2.85575	208.946	473	8.02461e-69	2.89448	201.881	464					8.90093e-72	2.87025	222.598	500	7.11657e-71	2.86892	218.34	492					1.22737e-69	2.8337	221.671	494	1.66081e-68	2.8316	216.361	484
GO:0042803	MF	protein homodimerization activity	1643	4.59136e-64	2.93447	175.108	414	3.33913e-65	2.97795	171.455	411					4.10913e-65	2.83503	201.821	455	5.23927e-65	2.86107	194.998	445					2.41577e-69	2.86689	215.008	483	9.99721e-70	2.88983	210.895	478					6.11193e-65	2.78514	214.113	472	4.86345e-65	2.80586	208.983	465
GO:0002218	BP	activation of innate immune response	606	1.25193e-61	5.84717	47.8637	183	4.4539e-63	5.99382	46.8377	183					1.20025e-64	5.79065	55.2531	200	1.98627e-66	5.97694	53.3488	199					2.15113e-71	6.14547	58.9411	215	5.36151e-73	6.29302	57.761	215					2.84622e-63	5.59643	58.6796	204	2.48261e-64	5.70847	57.2513	203
GO:0048544	BP	recognition of pollen	356	3.33547e-59	6.75775	38.2229	158	1.87015e-60	6.92273	37.4237	158					2.40079e-66	7.13806	44.0096	177	1.22975e-68	7.42693	42.5305	177					5.40983e-68	7.1752	46.9055	184	2.31513e-69	7.34242	45.9921	184					3.86422e-69	7.29232	46.7135	185	7.91027e-71	7.50066	45.6028	185
GO:0004364	MF	glutathione transferase activity	275	3.62993e-72	10.2511	29.3091	150	2.16817e-71	10.1939	28.6976	148					1.52567e-73	10.1099	33.7802	160	1.08559e-73	10.2085	32.6381	158					1.66988e-73	9.97848	35.9874	164	9.30941e-72	9.75192	35.2989	161					8.45222e-71	9.58101	35.8375	161	2.3259e-70	9.56314	34.9789	159
GO:0016021	CC	integral component of membrane	16882	1.51608e-55	1.5486	1685.57	2233	2.98383e-57	1.56452	1652.34	2204					1.46674e-64	1.56054	1942.89	2572	6.63101e-66	1.57729	1877.86	2505					6.83333e-67	1.55543	2070.14	2728	8.20309e-68	1.56537	2030.55	2688					2.21936e-65	1.54887	2061.19	2710	1.07062e-66	1.56207	2012.65	2662
GO:0031669	BP	cellular response to nutrient levels	1914	2.41155e-69	2.84761	205.502	473	1.19801e-67	2.83408	201.205	463					8.28063e-68	2.70615	236.613	514	1.00884e-65	2.69517	228.661	498					1.11591e-66	2.64004	252.183	533	9.70787e-66	2.63785	247.272	524					5.16743e-66	2.63154	251.15	530	7.5065e-65	2.62851	245.179	519
GO:0030247	MF	polysaccharide binding	446	4.65726e-49	5.01377	47.534	165	2.7614e-50	5.13597	46.5422	165					1.3228e-65	5.92364	54.7853	200	9.00078e-66	5.99713	52.9331	197					2.04218e-69	6.084	58.365	211	4.01498e-70	6.16699	57.2484	210					1.4062e-60	5.47733	58.1219	199	8.06652e-61	5.53225	56.7295	197
GO:0015824	BP	proline transport	476	1.76242e-66	5.95142	51.1071	196	6.93597e-65	5.88513	50.0384	192					8.52389e-67	5.71342	58.8442	210	7.2418e-68	5.84329	56.8666	208					3.52581e-64	5.44161	62.7163	213	1.84171e-63	5.42631	61.495	210					9.35199e-70	5.80736	62.4596	220	7.57e-68	5.72246	60.9746	215
GO:0009813	BP	flavonoid biosynthetic process	2143	4.96402e-65	4.12158	87.785	268	1.63434e-64	4.13287	85.8823	264					7.02961e-67	3.99883	101.343	293	2.99806e-67	4.05712	97.8273	288					1.18771e-69	4.01835	107.958	308	1.02453e-68	4.01084	105.753	303					6.32926e-63	3.78883	107.542	296	8.32101e-62	3.77801	104.909	290
GO:0009595	BP	detection of biotic stimulus	452	6.473e-67	6.25639	47.517	189	1.29149e-67	6.35318	46.5055	188					2.17045e-68	6.08096	54.8564	204	2.84254e-66	5.99613	52.9733	198					3.63344e-68	5.95268	58.5228	210	1.31056e-66	5.87891	57.3517	206					4.16836e-70	6.09603	58.2367	212	7.68135e-69	6.04945	56.8394	208
GO:0042594	BP	response to starvation	1831	4.86799e-66	2.84886	193.958	448	1.06436e-64	2.84122	189.818	439					1.09677e-65	2.72569	223.798	490	1.98503e-63	2.71065	216.136	474					2.1041e-65	2.67296	238.583	510	2.313e-64	2.66882	233.852	501					3.74094e-65	2.6716	237.561	508	7.50294e-64	2.66589	231.835	497
GO:0010167	BP	response to nitrate	1277	1.32865e-67	3.36661	137.109	359	1.23348e-63	3.28626	134.242	347	3.50094e-05	4.48769	2.8669	12	5.8987e-69	3.25619	157.866	393	2.55911e-64	3.17562	152.56	376	3.08354e-05	3.37558	5.30563	17	2.63444e-67	3.15727	168.254	405	3.39815e-65	3.12471	164.977	396					8.13369e-69	3.19671	167.565	407	9.95857e-64	3.0971	163.581	391	3.17366e-06	4.30128
GO:0080044	MF	quercetin 7-O-glucosyltransferase activity	455	9.60211e-58	5.54916	48.4932	179	1.32644e-57	5.5789	47.4814	177					2.63465e-62	5.61098	55.8908	198	8.94912e-65	5.83991	54.0012	198					1.92718e-64	5.65194	59.5427	207	6.85675e-66	5.78153	58.4036	207					1.66332e-62	5.52829	59.2948	204	1.549e-63	5.6366	57.8742	203
GO:1901527	BP	abscisic acid-activated signaling pathway involved in stomatal movement	693	9.38792e-57	4.20272	74.4059	229	2.19931e-58	4.3063	72.8501	229					1.76549e-58	4.0918	85.6703	250	2.43475e-61	4.25882	82.7911	250					4.9665e-61	4.12129	91.3076	263	9.25165e-63	4.21816	89.5295	263					2.16914e-61	4.14133	90.9338	263	6.97969e-63	4.23404	88.7718	262
GO:0080043	MF	quercetin 3-O-glucosyltransferase activity	460	1.20414e-57	5.50086	49.0261	180	1.61589e-57	5.53127	48.0032	178					4.25553e-62	5.5532	56.505	199	1.422e-64	5.77979	54.5946	199					3.52566e-64	5.58936	60.197	208	1.24404e-65	5.71753	59.0454	208					2.93916e-62	5.46851	59.9464	205	2.67944e-63	5.57614	58.5102	204
GO:0016829	MF	lyase activity	2267	1.36704e-58	3.08887	140.207	347	2.47555e-59	3.12891	137.236	344					1.03734e-57	2.93688	161.74	377	3.38998e-59	3.00336	156.163	372					6.53571e-60	2.9352	172.364	397	1.10786e-61	2.99269	169.066	396					4.53315e-58	2.89584	171.631	392	4.79519e-58	2.91544	167.479	386
GO:0006865	BP	amino acid transport	1457	3.97426e-63	3.76909	101.294	289	1.14959e-61	3.74672	99.1365	283					6.96487e-66	3.69095	116.677	318	8.37676e-65	3.69576	112.74	310					1.5485e-60	3.4559	124.355	320	2.7915e-59	3.43689	121.903	314					1.30264e-68	3.70841	123.991	334	4.36782e-66	3.65682	121.007	325
GO:0043168	MF	anion binding	13391	3.99543e-45	1.5287	1331.88	1784	4.8525e-47	1.54799	1303.75	1762					2.62865e-51	1.53335	1536.15	2050	1.27921e-55	1.56976	1483.1	2012					9.16688e-58	1.55595	1638.09	2200	3.21768e-61	1.58143	1606	2181					1.29798e-50	1.51411	1631.29	2154	2.46467e-54	1.54302	1591.46	2129
GO:0000155	MF	phosphorelay sensor kinase activity	473	8.5123e-55	5.20786	50.4116	179	3.85396e-56	5.33503	49.3598	179					1.58239e-57	5.15027	58.1019	196	3.39031e-59	5.31306	56.1375	195					4.39076e-63	5.40731	61.8983	210	1.53696e-64	5.53134	60.7141	210					6.32776e-57	5.02292	61.6405	201	6.21927e-58	5.12247	60.1638	200
GO:0019825	MF	oxygen binding	764	2.54282e-60	4.1364	81.426	248	7.97851e-61	4.18658	79.727	246					3.83015e-62	4.02354	93.8475	271	3.82023e-59	3.94861	90.6746	261					4.90082e-66	4.09608	99.9794	287	2.2251e-62	3.97937	98.0667	278	0.000145708	4.95909	1.91273	9	9.29103e-56	3.70897	99.5631	269	1.04891e-56	3.77205	97.1779	267
GO:0009805	BP	coumarin biosynthetic process	668	1.97089e-52	4.09128	71.7217	217	1.0121e-52	4.13367	70.222	215					8.25739e-56	4.06188	82.5797	240	4.6199e-56	4.1162	79.8044	236					1.47552e-63	4.32177	88.0136	261	9.82396e-63	4.31086	86.2997	257					2.78052e-63	4.31498	87.6533	260	1.79097e-63	4.35426	85.5694	257
GO:0009873	BP	ethylene-activated signaling pathway	883	4.99437e-54	3.5884	94.6159	261	3.13778e-55	3.65691	92.6321	260					1.4661e-60	3.65644	108.966	295	8.01086e-64	3.80685	105.295	295					5.35008e-64	3.70181	116.128	312	5.50914e-66	3.7895	113.861	312					3.07168e-63	3.68077	115.69	310	4.50014e-65	3.76829	112.934	309
GO:0016775	MF	phosphotransferase activity. nitrogenous group as acceptor	481	1.51698e-53	5.06924	51.2643	179	7.00546e-55	5.19302	50.1946	179					3.90007e-56	5.00503	59.0846	196	8.43301e-58	5.16375	57.087	195					1.51448e-61	5.24697	62.9452	210	5.4243e-63	5.36732	61.741	210					1.682e-55	4.87874	62.6831	201	1.65247e-56	4.97596	61.1813	200
GO:0004683	MF	calmodulin-dependent protein kinase activity	550	2.28063e-54	4.70443	58.6182	195	8.49872e-56	4.81955	57.3951	195					2.02223e-56	4.60544	67.5603	213	2.82626e-58	4.75638	65.2762	212					4.57497e-63	4.8739	71.9747	230	1.26966e-64	4.98594	70.5978	230					5.33442e-56	4.50208	71.675	219	3.71514e-57	4.59646	69.9579	218
GO:0009986	CC	cell surface	549	3.47604e-54	4.70681	58.2014	194	1.48037e-55	4.81774	57.0297	194					7.47826e-54	4.48211	66.8974	208	1.26317e-55	4.62715	64.6497	207					2.07894e-60	4.74652	71.3051	225	6.28312e-62	4.85599	69.9342	225					9.08973e-53	4.34374	71.058	213	7.37221e-54	4.43327	69.3683	212
GO:0009190	BP	cyclic nucleotide biosynthetic process	475	1.36203e-52	5.03502	50.9997	177	6.50463e-54	5.15826	49.9333	177					2.53112e-55	4.98547	58.7206	194	5.99496e-57	5.14187	56.7471	193					5.15778e-60	5.1857	62.5846	207	1.84404e-61	5.30685	61.3658	207					5.2568e-54	4.81661	62.3283	198	5.64626e-55	4.91102	60.8465	197
GO:1901652	BP	response to peptide	126	1.36857e-59	21.8737	13.5283	91	4.7039e-59	21.5381	13.2455	90					3.48976e-62	23.9748	15.5764	97	3.43573e-62	23.8532	15.0529	96					3.92391e-65	26.9121	16.6014	101	3.84047e-63	24.983	16.2781	99					1.69913e-62	24.5356	16.5334	99	4.15319e-62	24.0803	16.1403	98
GO:0060416	BP	response to growth hormone	126	1.36857e-59	21.8737	13.5283	91	4.7039e-59	21.5381	13.2455	90					3.48976e-62	23.9748	15.5764	97	3.43573e-62	23.8532	15.0529	96					3.92391e-65	26.9121	16.6014	101	3.84047e-63	24.983	16.2781	99					1.69913e-62	24.5356	16.5334	99	4.15319e-62	24.0803	16.1403	98
GO:0010294	MF	abscisic acid glucosyltransferase activity	370	1.15782e-53	6.0848	39.434	154	4.6055e-54	6.16287	38.6113	153					4.76211e-57	6.1075	45.4497	169	3.44326e-59	6.35584	43.9131	169					1.48062e-58	6.12689	48.4194	176	8.3169e-60	6.26691	47.493	176					2.96522e-57	6.02323	48.2178	174	5.19018e-58	6.12864	47.0626	173
GO:0010927	BP	cellular component assembly involved in morphogenesis	1026	3.00177e-55	3.36909	110.159	290	1.49234e-55	3.40159	107.856	287					4.13788e-52	3.13288	126.837	309	2.93045e-52	3.16907	122.574	303					1.67103e-55	3.17556	135.183	328	2.0302e-54	3.16154	132.55	322					6.47482e-53	3.10358	134.629	322	9.62037e-53	3.11973	131.428	317
GO:0019585	BP	glucuronate metabolic process	417	3.46902e-48	5.16099	44.7724	158	6.24587e-48	5.17844	43.8362	156					5.81985e-55	5.42516	51.5505	179	3.66947e-57	5.64479	49.818	179					6.07072e-56	5.3965	54.9426	186	2.9677e-57	5.5223	53.8727	186					7.01285e-52	5.11076	54.7177	180	1.07722e-52	5.20486	53.4168	179
GO:0052696	BP	flavonoid glucuronidation	417	3.46902e-48	5.16099	44.7724	158	6.24587e-48	5.17844	43.8362	156					5.81985e-55	5.42516	51.5505	179	3.66947e-57	5.64479	49.818	179					6.07072e-56	5.3965	54.9426	186	2.9677e-57	5.5223	53.8727	186					7.01285e-52	5.11076	54.7177	180	1.07722e-52	5.20486	53.4168	179
GO:1901421	BP	positive regulation of response to alcohol	606	2.22949e-48	4.11847	65.0649	198	3.75451e-49	4.18732	63.7044	197					6.58041e-51	4.06179	74.9152	218	1.58803e-51	4.13507	72.3974	215					5.22773e-56	4.22875	79.8447	234	6.37498e-57	4.29722	78.2899	233					2.1579e-51	4.01337	79.5178	226	2.33797e-51	4.04023	77.6273	223
GO:0009789	BP	positive regulation of abscisic acid-activated signaling pathway	606	2.22949e-48	4.11847	65.0649	198	3.75451e-49	4.18732	63.7044	197					6.58041e-51	4.06179	74.9152	218	1.58803e-51	4.13507	72.3974	215					5.22773e-56	4.22875	79.8447	234	6.37498e-57	4.29722	78.2899	233					2.1579e-51	4.01337	79.5178	226	2.33797e-51	4.04023	77.6273	223
GO:0051234	BP	establishment of localization	16875	4.67288e-54	1.66469	1038.24	1489	1.52664e-52	1.66074	1014.36	1454					1.26526e-56	1.63659	1202.32	1693	1.71106e-53	1.62565	1159.11	1628					2.9404e-57	1.62175	1281.6	1788	1.88749e-54	1.60903	1254.3	1743					5.04264e-60	1.64148	1275.59	1794	7.59985e-57	1.6279	1243.58	1742
GO:0080046	MF	quercetin 4'-O-glucosyltransferase activity	384	1.2306e-49	5.58852	40.9261	152	4.88488e-50	5.66151	40.0722	151					5.78046e-52	5.52765	47.1694	166	5.02872e-54	5.75235	45.5747	166					8.13718e-55	5.65275	50.2514	175	4.8659e-56	5.78193	49.2901	175					7.81014e-53	5.50187	50.0422	172	1.38965e-53	5.5999	48.8433	171
GO:0002237	BP	response to molecule of bacterial origin	542	2.17712e-45	4.4412	53.3219	171	1.2568e-46	4.55017	52.2031	171					1.02869e-49	4.50187	61.4146	191	5.78442e-52	4.68492	59.3442	191					4.78288e-50	4.43652	65.4609	198	2.22438e-51	4.54038	64.1824	198					1.1251e-49	4.42018	65.1921	197	1.2211e-50	4.50834	63.6375	196
GO:0016045	BP	detection of bacterium	660	4.81047e-54	4.19503	70.8627	218	2.48403e-54	4.23831	69.381	216					2.70025e-50	3.84341	81.5908	229	1.16867e-51	3.94556	78.8486	227					1.46275e-49	3.7394	86.9596	236	4.61711e-51	3.82705	85.2662	236					2.2032e-53	3.91145	86.6036	242	6.7426e-53	3.91778	84.5446	238
GO:0098581	BP	detection of external biotic stimulus	668	5.69993e-54	4.18894	70.9195	218	2.93089e-54	4.23228	69.4354	216					3.20845e-50	3.83771	81.6553	229	1.38179e-51	3.93986	78.9087	227					1.76174e-49	3.73351	87.0328	236	5.55651e-51	3.82109	85.3366	236					2.67848e-53	3.90517	86.6762	242	8.13659e-53	3.91166	84.6139	238
GO:0006995	BP	cellular response to nitrogen starvation	441	8.16517e-51	5.16152	47.3492	167	4.55788e-52	5.28769	46.3591	167					1.10603e-50	4.92623	54.5175	179	2.02503e-51	5.02858	52.6852	177					1.82699e-51	4.88661	58.1048	186	9.58314e-53	5.00054	56.9733	186					2.54925e-48	4.68325	57.8669	181	3.80253e-49	4.77142	56.4912	180
GO:0047893	MF	flavonol 3-O-glucosyltransferase activity	360	9.47232e-48	5.68166	38.3683	144	2.50368e-47	5.68444	37.5677	142					1.3881e-50	5.67397	44.2213	158	1.4825e-52	5.9044	42.7262	158					1.03874e-53	5.83777	47.1107	167	6.94483e-55	5.97106	46.2094	167					6.34119e-51	5.6066	46.9146	163	1.36065e-51	5.70246	45.7906	162
GO:0050896	BP	response to stimulus	12255	8.95175e-53	3.2353	109.509	286	2.71476e-45	2.93183	116.452	282					1.52741e-52	3.0486	128.284	315	5.06064e-50	3.02065	123.226	302					2.54766e-55	3.04436	138.264	336	5.7125e-54	3.03471	134.846	328					3.49702e-53	2.98099	139.221	333	1.5396e-42	2.63408	147.38	322
GO:0042538	BP	hyperosmotic salinity response	1240	6.56556e-48	2.8921	131.948	311	4.88174e-47	2.88633	129.156	305					1.79264e-52	2.8945	151.975	350	7.86647e-51	2.88035	146.81	339					2.48852e-52	2.83962	162.017	364	3.34172e-51	2.82661	158.827	357					1.84999e-56	2.9461	161.364	372	1.90316e-53	2.89031	157.485	360
GO:0080148	BP	negative regulation of response to water deprivation	148	2.40638e-51	13.8185	15.8904	92	5.44649e-51	13.7514	15.5582	91					6.37808e-54	14.4804	18.2961	99	3.94075e-54	14.6089	17.6812	98					5.58473e-56	15.2455	19.5	103	1.88149e-54	14.6403	19.1203	101					5.63689e-55	14.838	19.4202	102	8.41174e-55	14.7853	18.9585	101
GO:0009651	BP	response to salt stress	6273	3.01325e-51	1.90101	503.366	834	4.24202e-51	1.90874	492.676	820					9.17844e-51	1.83737	580.362	928	8.33344e-50	1.84091	560.571	900					2.07571e-56	1.86836	619.366	997	2.49788e-55	1.86569	607.159	978					1.41434e-51	1.82279	616.188	975	8.43122e-52	1.83412	601.597	958
GO:0004712	MF	protein serine/threonine/tyrosine kinase activity	610	1.47402e-43	3.86748	65.0129	190	7.18929e-45	3.96207	63.6564	190					1.60513e-43	3.80038	71.1829	199	3.69815e-45	3.92494	68.7731	198					6.15705e-50	4.04956	75.8231	217	2.48485e-51	4.14266	74.3704	217					7.3051e-45	3.8013	75.5154	208	6.49477e-46	3.88136	73.7038	207
GO:0080045	MF	quercetin 3'-O-glucosyltransferase activity	353	1.06772e-46	5.66624	37.6222	141	5.17924e-47	5.73476	36.8372	140					3.50622e-48	5.54616	43.3615	153	4.41902e-50	5.77127	41.8955	153					7.55233e-50	5.58859	46.1947	160	5.79379e-51	5.7161	45.3109	160					2.43153e-49	5.55132	46.0023	159	5.64084e-50	5.64485	44.9002	158
GO:0000160	BP	phosphorelay signal transduction system	1490	9.55729e-45	4.15232	58.4191	180	4.60595e-46	4.25722	57.1574	180					1.05909e-45	4.01851	67.3255	196	8.93022e-47	4.12094	64.9752	194					3.13321e-51	4.2297	71.7704	212	1.09047e-52	4.3322	70.319	212					9.02756e-45	3.8977	71.5065	201	3.29732e-45	3.94962	69.75	199
GO:0044425	CC	membrane part	17144	4.25066e-40	1.44328	1793.34	2260	2.77817e-41	1.45579	1757.11	2227					1.77208e-46	1.45187	2069.57	2606	1.38831e-47	1.46599	2000.45	2536					2.24127e-47	1.44327	2206.53	2763	3.92223e-48	1.45178	2163.36	2720					1.95857e-45	1.43331	2194.97	2738	4.51323e-47	1.44776	2143.06	2691
GO:0051552	BP	flavone metabolic process	347	7.45048e-46	5.64348	37.2566	139	2.11861e-45	5.6417	36.4776	137					1.73976e-47	5.54242	42.897	151	2.3867e-49	5.76609	41.4553	151					3.28927e-52	5.85754	45.7197	162	1.35733e-52	5.92394	44.8293	161					6.45812e-48	5.48541	45.5325	156	2.88856e-49	5.64167	44.45	156
GO:0009409	BP	response to cold	7387	2.08671e-53	1.75176	755.922	1156	5.33e-53	1.75597	739.986	1135					9.15244e-49	1.6649	870.371	1273	6.85288e-49	1.67662	841.19	1239					1.92122e-48	1.64308	927.699	1339	6.58132e-49	1.65267	909.694	1320					7.12297e-48	1.63962	923.974	1332	5.79536e-49	1.65573	901.829	1311
GO:0009755	BP	hormone-mediated signaling pathway	3917	2.72948e-42	2.603	145.809	321	1.657e-41	2.60172	142.259	314					8.16673e-46	2.5777	169.336	363	5.35026e-45	2.58645	162.946	352					2.78424e-48	2.58755	180.768	385	2.70213e-47	2.58115	176.753	377					1.8645e-43	2.48006	179.985	372	2.68921e-43	2.49448	175.211	365
GO:0044106	BP	cellular amine metabolic process	1148	2.9912e-43	2.84308	123.258	287	1.07939e-42	2.84415	120.681	282					3.9603e-50	2.92236	141.918	329	1.81703e-45	2.81999	137.149	312	8.02526e-06	3.76783	4.76967	17	2.71739e-52	2.92878	151.257	347	3.15358e-48	2.8349	148.312	334	9.74709e-06	4.72801	2.94548	13	9.43255e-47	2.78285	150.638	334	1.495e-44	2.74053	147.056	324
GO:0005506	MF	iron ion binding	1768	8.08717e-48	2.51024	188.431	397	8.03762e-47	2.50362	184.499	389					1.59503e-49	2.44977	217.176	441	6.58316e-45	2.37809	209.833	419	6.03021e-06	3.19246	7.34247	22	3.8558e-54	2.49844	231.366	472	1.96655e-49	2.4202	226.94	454	5.70902e-07	4.46502	4.42631	18	6.58319e-47	2.36167	230.403	452	2.64806e-46	2.36417	224.883	443
GO:0034754	BP	cellular hormone metabolic process	1169	2.83674e-44	3.47609	81.1941	220	4.0829e-44	3.49348	79.4687	217					1.44355e-48	3.49679	93.5743	247	8.8296e-46	3.42245	90.3925	237					4.14224e-50	3.49192	99.6468	259	2.22662e-47	3.40664	97.6861	251					4.25532e-46	3.34105	99.3107	251	2.67444e-44	3.29461	96.9131	244
GO:0009404	BP	toxin metabolic process	1387	2.6337e-42	5.07692	39.3703	139	1.16952e-42	5.14409	38.5236	138					7.70145e-45	5.04771	45.4264	153	1.30596e-44	5.08541	43.8451	150					1.28423e-47	5.16816	48.4769	162	1.26143e-46	5.12038	47.5068	159					2.41004e-44	4.91773	48.2638	157	1.27492e-43	4.8975	47.075	154
GO:0009863	BP	salicylic acid mediated signaling pathway	706	8.0402e-35	3.22825	72.1067	187	1.39746e-35	3.28731	70.5085	186					4.57242e-41	3.36384	83.2097	216	1.89803e-43	3.5048	80.3183	216					1.65901e-44	3.44402	88.8664	231	5.37341e-46	3.52801	87.0579	231					7.6922e-45	3.46276	88.4563	231	4.15558e-46	3.54237	86.2694	230
GO:0009625	BP	response to insect	429	1.32215e-39	4.44808	46.0608	148	2.3202e-39	4.4618	45.0977	146					1.56416e-42	4.45405	53.034	164	1.81708e-42	4.49647	51.2516	161					9.60041e-47	4.65534	56.5237	176	6.39341e-46	4.62586	55.423	173					5.35865e-45	4.54239	56.2923	173	1.96557e-44	4.53602	54.954	170
GO:0010120	BP	camalexin biosynthetic process	331	3.87052e-41	5.38612	35.5387	129	2.2518e-41	5.44654	34.7956	128					3.98937e-43	5.33294	40.919	141	4.16644e-44	5.47896	39.5438	140					1.06737e-45	5.46856	43.6116	149	2.91308e-45	5.45901	42.7623	147					2.81541e-42	5.16511	43.433	144	4.61447e-42	5.18148	42.4004	142
GO:0019901	MF	protein kinase binding	740	5.70136e-39	3.29924	78.8681	206	2.61011e-40	3.38012	77.2225	206					6.30431e-41	3.24118	90.8994	228	8.35086e-43	3.3521	87.8262	227					2.63478e-47	3.4364	96.8387	249	8.2003e-49	3.51558	94.9861	249					2.44629e-40	3.16294	96.4355	235	1.50134e-41	3.2338	94.1251	234
GO:0048519	BP	negative regulation of biological process	9268	1.08778e-44	1.62476	888.161	1275	4.67341e-48	1.66011	869.087	1268					1.82392e-45	1.58945	1026.05	1440	1.44957e-48	1.62379	990.891	1414					1.21644e-44	1.56577	1094.49	1515	7.04538e-48	1.59588	1072.68	1506					5.32673e-42	1.54627	1089.88	1496	1.96001e-44	1.57173	1063.33	1478
GO:0070301	BP	cellular response to hydrogen peroxide	209	5.95631e-39	7.28308	22.4399	97	9.98984e-40	7.45949	21.9707	97					2.41454e-41	7.37532	25.8371	106	1.01915e-42	7.67144	24.9687	106					3.21652e-42	7.39982	27.5372	110	4.87102e-43	7.57097	27.001	110					2.17083e-42	7.43523	27.4245	110	2.14993e-43	7.64601	26.7725	110
GO:0046217	BP	indole phytoalexin metabolic process	340	1.11603e-39	5.15562	36.505	129	6.35773e-40	5.21455	35.7417	128					1.67231e-41	5.09099	42.0316	141	1.73974e-42	5.23162	40.619	140					1.14168e-44	5.27334	44.7974	150	2.90991e-44	5.26704	43.925	148					5.00978e-42	5.04843	44.614	146	7.66417e-42	5.06737	43.5533	144
GO:0009695	BP	jasmonic acid biosynthetic process	829	1.48184e-41	3.22279	89.0079	228	1.65401e-42	3.28176	87.1468	227					1.79197e-42	3.12355	102.483	250	5.08572e-43	3.17531	99.0386	246					1.47395e-42	3.07069	109.227	260	4.32459e-43	3.10694	107.1	258					6.59577e-48	3.26592	108.779	270	2.23741e-49	3.34124	106.193	269
GO:0006586	BP	indolalkylamine metabolic process	661	4.53884e-42	3.62595	70.9701	198	2.85103e-42	3.66046	69.4861	196					3.83558e-46	3.65444	81.7144	222	6.42828e-43	3.5459	78.9681	212					1.73048e-45	3.55798	87.0913	229	4.74144e-43	3.47051	85.3954	222					5.65844e-42	3.40755	86.7348	222	2.28733e-39	3.31499	84.6727	214
GO:0009696	BP	salicylic acid metabolic process	250	2.56844e-36	6.10332	25.2743	101	3.73248e-37	6.26061	24.71	101					7.45287e-42	6.53256	29.1616	115	2.0574e-43	6.81068	28.1187	115					6.96615e-44	6.67141	31.1538	121	7.77736e-45	6.83609	30.5034	121					1.27327e-41	6.3865	31.0229	118	9.90914e-43	6.57641	30.2455	118
GO:0006886	BP	intracellular protein transport	5360	9.48921e-46	1.78271	575.491	904	5.28298e-48	1.81467	563.458	898					1.66817e-42	1.7002	662.616	996	2.53959e-44	1.72995	640.346	977					1.94865e-43	1.68944	706.217	1052	1.29053e-45	1.71694	692.465	1045					1.08812e-44	1.70295	703.326	1054	7.44654e-46	1.72203	686.604	1039
GO:0004674	MF	protein serine/threonine kinase activity	2363	1.37366e-28	1.96441	224.665	393	1.04042e-29	1.99966	219.458	390					2.56102e-38	2.0876	260.495	471	1.65834e-40	2.14754	250.805	465					8.48323e-43	2.13569	277.599	507	1.07002e-44	2.17977	271.737	505					4.50833e-36	2.01721	276.909	485	1.17688e-38	2.07665	269.702	484
GO:0042436	BP	indole-containing compound catabolic process	655	3.03882e-40	3.79111	62.096	179	7.01243e-41	3.85176	60.8009	178					3.13557e-43	3.7801	71.5001	199	6.4121e-42	3.75204	69.1047	193					3.18223e-44	3.75872	76.2318	208	1.18417e-42	3.70164	74.7505	203					5.36377e-40	3.5529	75.8932	200	9.80677e-39	3.51403	74.0987	195
GO:0009684	BP	indoleacetic acid biosynthetic process	686	5.87355e-39	3.41388	73.6543	197	1.23133e-38	3.42178	72.1142	194					2.74288e-44	3.50329	84.8049	224	3.1598e-41	3.40449	81.9548	214	0.000671378	3.63825	2.85017	10	3.02085e-46	3.5218	90.3853	236	7.09274e-44	3.44068	88.6252	229					3.06708e-42	3.35568	90.0152	228	3.09379e-40	3.29259	87.8751	221
GO:0052315	BP	phytoalexin biosynthetic process	347	1.37828e-38	4.9895	37.2566	129	7.73401e-39	5.0473	36.4776	128					2.71897e-40	4.91742	42.897	141	2.82401e-41	5.05412	41.4553	140					2.39076e-43	5.08537	45.7197	150	5.78826e-43	5.08117	44.8293	148					9.13209e-41	4.87204	45.5325	146	1.33485e-40	4.89206	44.45	144
GO:0006749	BP	glutathione metabolic process	287	7.78545e-43	6.14457	30.8146	121	5.60246e-43	6.20349	30.1702	120					5.60238e-45	6.11686	35.4796	132	7.7722e-46	6.27361	34.2872	131					1.45298e-46	6.18237	37.8142	138	5.70647e-46	6.14992	37.0779	136					5.56932e-46	6.12512	37.6594	137	2.14817e-46	6.21104	36.7641	136
GO:0080024	BP	indolebutyric acid metabolic process	192	1.11456e-36	7.41407	20.6146	90	2.1177e-37	7.59349	20.1836	90					2.60708e-41	7.95097	23.7355	101	1.23665e-42	8.27001	22.9378	101					2.05552e-42	8.03485	25.2973	105	3.31978e-43	8.2206	24.8047	105					1.12535e-41	7.90451	25.1938	104	1.24028e-42	8.12845	24.5948	104
GO:0009704	BP	de-etiolation	176	2.00645e-44	9.64071	18.8967	94	3.25724e-44	9.64987	18.5016	93					5.96759e-45	9.42721	21.7575	100	2.65065e-45	9.57997	21.0263	99					2.52892e-46	9.61767	23.1892	104	3.68841e-45	9.38745	22.7377	102					1.53532e-44	9.21929	23.0943	102	1.58549e-44	9.26109	22.5452	101
GO:0000166	MF	nucleotide binding	14228	4.03952e-31	1.40045	1516.4	1904	8.6722e-33	1.41749	1484.76	1880					2.23542e-33	1.39039	1747.72	2175	6.38836e-38	1.42836	1688.64	2140					4.16175e-38	1.41037	1861.92	2333	2.12573e-41	1.43517	1826.3	2315					2.1918e-33	1.37987	1854.17	2292	1.07682e-36	1.40652	1809.75	2266
GO:0052638	MF	indole-3-butyrate beta-glucosyltransferase activity	183	2.39808e-36	7.67714	19.5039	87	4.7926e-37	7.86232	19.0969	87					2.38938e-40	8.13724	22.4792	97	1.24475e-41	8.46539	21.7192	97					1.33434e-41	8.26302	23.948	101	2.36768e-42	8.45038	23.4898	101					7.55952e-41	8.12086	23.8482	100	8.8504e-42	8.35244	23.2769	100
GO:0042402	BP	cellular biogenic amine catabolic process	857	1.84543e-39	3.70717	63.4031	180	1.59066e-39	3.73598	62.084	178					6.97006e-43	3.71994	72.9578	201	1.76988e-40	3.63699	70.5279	193	7.38029e-05	3.82053	3.56063	13	2.97323e-43	3.66877	77.7568	209	3.72205e-41	3.58654	76.2642	203	8.29174e-05	4.80598	2.19885	10	1.285e-39	3.49525	77.4531	202	2.4651e-37	3.40681	75.6046	195
GO:0006569	BP	tryptophan catabolic process	593	3.23281e-39	3.68916	63.6691	180	2.73505e-39	3.71833	62.3378	178					1.42582e-42	3.69897	73.3081	201	3.3471e-40	3.61791	70.8443	193					6.25261e-43	3.64783	78.1319	209	7.30313e-41	3.56731	76.6104	203					2.52985e-39	3.4761	77.812	202	4.76926e-37	3.38785	75.962	195
GO:0047251	MF	thiohydroximate beta-D-glucosyltransferase activity	178	9.91291e-36	7.74083	18.971	85	2.05219e-36	7.9275	18.5751	85					6.99038e-40	8.25593	21.865	95	3.84945e-41	8.58879	21.1258	95					3.31532e-41	8.40549	23.2936	99	6.06491e-42	8.59604	22.848	99					1.9224e-40	8.25542	23.1966	98	2.33868e-41	8.49079	22.6409	98
GO:0043900	BP	regulation of multi-organism process	1560	6.34529e-45	3.30181	91.5562	239	6.24792e-45	3.32469	89.6071	236					7.6393e-44	3.12329	105.582	258	5.02806e-43	3.12583	101.964	251					2.34459e-41	2.98005	112.538	263	6.28559e-42	3.01681	110.321	261					4.59668e-47	3.18204	112.092	274	1.49937e-46	3.18653	109.378	269
GO:0052641	MF	benzoic acid glucosyltransferase activity	179	1.69098e-35	7.65835	19.0776	85	3.50927e-36	7.84304	18.6795	85					1.31039e-39	8.1575	21.9878	95	7.24971e-41	8.4864	21.2444	95					6.46647e-41	8.30028	23.4245	99	1.18631e-41	8.48844	22.9764	99					3.70561e-40	8.15336	23.327	98	4.524e-41	8.38582	22.7681	98
GO:0052639	MF	salicylic acid glucosyltransferase (ester-forming) activity	179	1.69098e-35	7.65835	19.0776	85	3.50927e-36	7.84304	18.6795	85					1.31039e-39	8.1575	21.9878	95	7.24971e-41	8.4864	21.2444	95					6.46647e-41	8.30028	23.4245	99	1.18631e-41	8.48844	22.9764	99					3.70561e-40	8.15336	23.327	98	4.524e-41	8.38582	22.7681	98
GO:0042631	BP	cellular response to water deprivation	802	5.96708e-37	3.08639	86.109	214	2.64366e-38	3.16233	84.3084	214					3.35934e-41	3.12414	99.1451	242	1.12297e-42	3.21232	95.813	240					2.02266e-43	3.15061	105.669	256	2.01752e-43	3.16816	103.611	253					3.0979e-43	3.14738	105.236	255	1.4502e-43	3.18118	102.734	252
GO:0080002	MF	UDP-glucose:4-aminobenzoate acylglucosyltransferase activity	197	2.65098e-33	6.6985	20.996	87	5.48277e-34	6.86008	20.5579	87					2.24693e-39	7.43892	24.1989	100	1.11015e-40	7.73902	23.3807	100					1.99108e-40	7.50325	25.78	104	3.43789e-41	7.67343	25.2868	104					1.36315e-40	7.53972	25.6727	104	1.49909e-41	7.75483	25.0576	104
GO:0052640	MF	salicylic acid glucosyltransferase (glucoside-forming) activity	181	4.84749e-35	7.49856	19.2907	85	1.01093e-35	7.67939	18.8882	85					4.51944e-39	7.96753	22.2335	95	2.52378e-40	8.28877	21.4818	95					2.41033e-40	8.09756	23.6862	99	4.44706e-41	8.28113	23.2331	99					1.34964e-39	7.95662	23.5876	98	1.6594e-40	8.18348	23.0225	98
GO:0018874	BP	benzoate metabolic process	180	4.98147e-35	7.51382	19.3262	85	1.03499e-35	7.69554	18.9221	85					4.17782e-39	8.00161	22.252	95	2.3706e-40	8.32247	21.5042	95					2.28018e-40	8.13224	23.7163	99	4.07671e-41	8.32012	23.2544	99					1.28962e-39	7.98891	23.6192	98	1.60984e-40	8.21511	23.0576	98
GO:0071475	BP	cellular hyperosmotic salinity response	181	8.40608e-35	7.43543	19.4336	85	1.75084e-35	7.61525	19.0272	85					7.72799e-39	7.90843	22.3756	95	4.40555e-40	8.22556	21.6236	95					4.38295e-40	8.03293	23.848	99	7.85907e-41	8.21852	23.3836	99					2.45055e-39	7.89253	23.7504	98	3.06988e-40	8.11599	23.1857	98
GO:0051707	BP	response to other organism	9207	9.51004e-31	2.22828	157.869	309	6.78788e-08	3.3034	11.9424	33					3.16839e-36	2.27159	183.926	360	1.60056e-36	2.30299	176.725	351					7.95359e-43	2.37598	197.168	396	4.60462e-41	2.35265	192.561	385					4.79177e-34	2.18462	196.009	370	3.86924e-08	3.13592	14.831	38
GO:0010150	BP	leaf senescence	1047	7.32871e-35	2.77477	103.241	237	2.20558e-35	2.81095	101.072	235					2.07198e-36	2.71834	118.945	263	4.7447e-38	2.79967	114.931	261					6.41822e-40	2.7855	126.791	282	1.36358e-40	2.82214	124.312	280					8.44814e-40	2.78476	126.269	281	8.10869e-41	2.83604	123.255	279
GO:0046482	BP	para-aminobenzoic acid metabolic process	418	7.67248e-33	4.02132	44.8797	135	8.72114e-34	4.11922	43.9413	135					3.66558e-37	4.14981	51.6742	153	6.48472e-39	4.31734	49.9375	153					4.66253e-40	4.27126	55.0744	163	3.87497e-41	4.37061	54.0019	163					3.31824e-42	4.42456	54.8489	166	6.56291e-43	4.50486	53.5449	165
GO:0016144	BP	S-glycoside biosynthetic process	1189	1.02119e-34	2.54715	127.66	274	8.28315e-34	2.53411	124.991	268					1.22741e-39	2.59175	146.987	313	1.04877e-36	2.53204	142.047	299	0.000524496	2.95173	4.94001	14	5.56513e-42	2.61207	156.659	332	3.61361e-39	2.54883	153.608	321	0.000276894	3.80543	3.05067	11	6.22424e-42	2.61357	156.018	331	2.87634e-38	2.52957	152.308	317	2.61693e-05	4.00382
GO:0051094	BP	positive regulation of developmental process	1462	1.71737e-38	2.46007	156.972	327	1.01449e-38	2.48036	153.689	323					2.45773e-35	2.29321	180.736	351	4.02313e-36	2.33257	174.662	345					4.67992e-39	2.34584	192.629	377	2.5786e-38	2.3398	188.878	370					7.18314e-37	2.29666	191.84	370	1.26235e-37	2.32831	187.279	366
GO:0070370	BP	cellular heat acclimation	566	2.49319e-39	3.78723	60.7702	175	1.56859e-40	3.87992	59.4995	175					2.95192e-35	3.41172	69.9703	182	3.33147e-37	3.54993	67.6187	182					2.55593e-35	3.35281	74.5744	189	1.80599e-36	3.43102	73.1222	189					4.33681e-36	3.39627	74.2691	190	5.70047e-37	3.46532	72.5034	189
GO:0072359	BP	circulatory system development	615	2.83336e-35	3.41778	66.0312	177	1.92008e-36	3.50146	64.6505	177					1.20765e-34	3.244	76.0278	191	1.20227e-36	3.37555	73.4726	191					1.54185e-37	3.32326	81.0305	204	8.91307e-39	3.4009	79.4526	204					9.44967e-37	3.28971	80.6988	202	3.43831e-37	3.33337	78.7802	200
GO:0001944	BP	vasculature development	615	2.83336e-35	3.41778	66.0312	177	1.92008e-36	3.50146	64.6505	177					1.20765e-34	3.244	76.0278	191	1.20227e-36	3.37555	73.4726	191					1.54185e-37	3.32326	81.0305	204	8.91307e-39	3.4009	79.4526	204					9.44967e-37	3.28971	80.6988	202	3.43831e-37	3.33337	78.7802	200
GO:1905957	BP	regulation of cellular response to alcohol	1095	5.47686e-34	2.60572	117.568	257	4.77486e-35	2.65623	115.109	256					1.16364e-35	2.55875	135.366	286	4.78332e-37	2.62488	130.817	283					7.54116e-39	2.61023	144.274	306	4.54572e-40	2.65944	141.464	305					1.7287e-35	2.51414	143.683	297	3.61569e-36	2.55014	140.267	294
GO:0009741	BP	response to brassinosteroid	1102	5.97319e-32	2.54203	116.778	251	1.4034e-32	2.57852	114.285	249					2.14285e-36	2.58244	134.744	287	9.56858e-36	2.58688	130.131	279					7.19973e-41	2.6697	143.646	310	7.43249e-41	2.68363	140.797	306					8.09027e-34	2.46541	143.03	292	1.71121e-34	2.50128	139.583	289
GO:0002229	BP	defense response to oomycetes	351	9.09486e-36	5.08644	33.3474	117	3.23487e-35	5.06728	32.6487	115					2.27647e-35	4.82653	38.4055	125	1.80579e-35	4.88678	37.1126	123					4.80705e-38	4.9887	40.9323	133	1.47807e-37	4.97062	40.1339	131					3.96516e-34	4.62685	40.7644	127	1.65836e-34	4.69486	39.7936	126
GO:0042493	BP	response to drug	1403	4.13226e-33	2.51363	120.505	261	4.46149e-34	2.56277	117.47	259					3.32131e-34	2.4415	139.754	291	2.86907e-35	2.49971	134.276	286					1.00512e-36	2.46614	149.499	311	1.86061e-37	2.50219	146.023	308					5.52434e-40	2.55421	149.411	319	4.54869e-39	2.54948	145.319	311
GO:0036211	BP	protein modification process	15054	8.54618e-27	1.35648	1616.31	1982	2.00846e-29	1.381	1582.52	1964					2.9758e-31	1.36576	1861.01	2283	3.35821e-36	1.4059	1798.47	2249					1.03803e-34	1.3781	1983.47	2442	1.60069e-38	1.4061	1944.84	2426					4.8577e-28	1.33346	1975.35	2383	5.5592e-32	1.36475	1928.39	2362
GO:0009808	BP	lignin metabolic process	1355	4.11213e-38	3.856	56.2376	165	4.38535e-38	3.88189	55.0391	163					2.69181e-34	3.47261	64.9848	172	1.61032e-34	3.52185	62.7623	169					1.16527e-35	3.48216	69.2711	181	1.09805e-35	3.50364	67.9138	179					1.9835e-36	3.52777	69.0012	182	3.61746e-36	3.53883	67.3343	179
GO:0008061	MF	chitin binding	104	1.90667e-39	15.3121	11.0842	67	5.04828e-40	15.6805	10.8529	67					1.0385e-36	13.591	12.775	68	1.17243e-37	14.1372	12.3431	68					3.26878e-37	13.7745	13.6098	70	9.25946e-38	14.0858	13.3494	70					3.35846e-36	13.2519	13.5531	69	7.08225e-37	13.6286	13.2284	69
GO:0071289	BP	cellular response to nickel ion	60	7.52523e-39	41.8462	6.44207	50	2.67162e-39	42.8537	6.30736	50					2.02813e-37	40.4089	7.41734	51	3.67875e-38	42.0213	7.16806	51					4.86419e-36	37.5481	7.90542	51	1.82597e-36	38.4113	7.75147	51					3.96525e-36	37.7267	7.87305	51	1.19538e-36	38.7897	7.68587	51
GO:0006032	BP	chitin catabolic process	99	1.63061e-36	14.666	10.6294	63	4.68017e-37	15.0197	10.4072	63					4.98444e-34	13.054	12.2386	64	6.52183e-35	13.5756	11.8273	64					1.35704e-34	13.2691	13.0439	66	4.05864e-35	13.5746	12.7899	66					2.02466e-31	11.6612	12.9905	63	5.01947e-32	11.9902	12.6817	63
GO:0046348	BP	amino sugar catabolic process	99	1.63061e-36	14.666	10.6294	63	4.68017e-37	15.0197	10.4072	63					4.98444e-34	13.054	12.2386	64	6.52183e-35	13.5756	11.8273	64					1.35704e-34	13.2691	13.0439	66	4.05864e-35	13.5746	12.7899	66					2.02466e-31	11.6612	12.9905	63	5.01947e-32	11.9902	12.6817	63
GO:0033612	MF	receptor serine/threonine kinase binding	616	1.62465e-34	3.38414	65.6524	175	1.15351e-35	3.46675	64.2825	175					2.22866e-32	3.13648	75.6676	186	2.60287e-34	3.26432	73.1093	186					2.97627e-33	3.12285	80.6117	195	2.20197e-34	3.19439	79.0695	195					5.37026e-34	3.1622	80.276	196	6.39237e-35	3.22862	78.3528	195
GO:0022898	BP	regulation of transmembrane transporter activity	773	5.0324e-36	3.09956	82.9953	207	2.4557e-37	3.17576	81.2599	207					5.79375e-33	2.85017	95.5601	219	4.00392e-35	2.96614	92.3485	219					9.64972e-36	2.91031	101.848	234	4.44941e-37	2.97853	99.8648	234					1.25523e-34	2.86982	101.431	231	9.22393e-36	2.93368	99.0196	230
GO:0007568	BP	aging	1558	2.55984e-35	2.38014	156.425	318	6.65264e-36	2.40928	153.141	315					7.87609e-34	2.25794	180.143	346	1.36856e-34	2.29645	174.064	340					1.99573e-36	2.28578	192.023	369	3.80595e-37	2.31405	188.269	366					4.01719e-36	2.28105	191.149	367	7.54652e-37	2.31192	186.627	363
GO:0000162	BP	tryptophan biosynthetic process	276	3.85736e-34	5.32661	29.6335	107	3.27431e-34	5.37218	29.0139	106					1.18777e-33	5.04301	34.1198	114	2.62033e-34	5.16705	32.9731	113					1.02891e-36	5.27819	36.3649	122	4.11429e-36	5.24242	35.6568	120					4.88615e-34	4.99715	36.216	118	1.27009e-33	4.98737	35.355	116
GO:0046686	BP	response to cadmium ion	3255	6.33028e-34	1.8459	349.482	574	1.65779e-34	1.86355	342.175	567					1.4619e-33	1.78752	402.391	638	1.74097e-34	1.81359	388.867	625					1.04786e-39	1.85109	428.869	694	1.33906e-40	1.87073	420.517	687					8.71487e-34	1.77008	427.113	669	7.1652e-34	1.77957	416.958	657
GO:0010008	CC	endosome membrane	951	7.89324e-34	2.76123	100.819	231	3.70044e-35	2.82666	98.7892	231					2.37738e-32	2.60377	115.882	249	2.97372e-34	2.69477	111.989	248					9.36434e-37	2.70765	123.518	270	3.21021e-38	2.77044	121.143	270					1.33847e-33	2.60483	123.09	262	4.79573e-34	2.63656	120.163	259
GO:0010204	BP	defense response signaling pathway. resistance gene-independent	590	2.08289e-38	3.65607	63.347	178	4.85035e-39	3.71494	62.0224	177					1.09479e-33	3.2619	72.9372	184	4.34088e-35	3.36685	70.4859	183					3.87589e-33	3.17586	77.7366	190	2.87177e-34	3.24996	76.2228	190					6.60908e-35	3.26736	77.4184	193	8.37078e-36	3.33456	75.5777	192
GO:0010112	BP	regulation of systemic acquired resistance	310	4.45719e-33	4.82754	33.284	113	3.23604e-33	4.87545	32.5881	112					8.70399e-33	4.58978	38.3229	121	1.55802e-33	4.70935	37.035	120					8.74668e-37	4.87888	40.8447	131	2.69634e-36	4.86017	40.0493	129					3.00293e-34	4.6463	40.6774	127	1.26289e-34	4.71426	39.7103	126
GO:0009072	BP	aromatic amino acid family metabolic process	1566	8.33493e-34	2.56197	121.741	263	1.67516e-34	2.59989	119.148	261					5.77005e-38	2.58835	140.212	299	1.35182e-36	2.5723	135.413	289					7.39347e-37	2.51366	149.44	309	6.98066e-35	2.46959	146.476	300					1.13933e-33	2.4246	148.766	300	1.85833e-32	2.40382	145.18	292
GO:0071446	BP	cellular response to salicylic acid stimulus	224	9.3943e-32	5.9731	22.4907	89	1.68998e-32	6.12883	21.9816	89					1.39608e-31	5.67741	25.9531	95	7.8147e-33	5.9181	25.026	95					8.22759e-31	5.46163	27.7164	97	1.51303e-31	5.59628	27.1365	97					1.4367e-35	6.12568	27.5849	103	1.54159e-36	6.30914	26.887	103
GO:0019757	BP	glycosinolate metabolic process	1409	1.22458e-30	2.34895	138.811	280	6.9572e-30	2.33945	135.915	274									4.02294e-33	2.35471	154.48	308	3.08281e-05	3.24332	5.85406	18	3.00097e-38	2.43178	170.414	343	4.00635e-36	2.38845	167.102	333					1.74411e-37	2.41478	169.657	340	3.14835e-34	2.34344	165.645	326	1.07783e-05	3.88604
GO:0052542	BP	defense response by callose deposition	293	2.46064e-29	4.66781	30.3918	102	4.15047e-30	4.78486	29.7327	102					8.25234e-35	5.01059	35.1139	118	7.40138e-35	5.07093	33.8911	116					6.67297e-35	4.92435	37.4467	122	9.11937e-36	5.04128	36.6965	122					3.42476e-37	5.1619	37.2949	125	2.78595e-38	5.31121	36.3887	125
GO:0033609	BP	oxalate metabolic process	76	4.91139e-34	19.2895	8.15995	53	9.67747e-31	16.4779	7.98933	50	0.000691727	18.6072	0.170622	3	9.74066e-39	24.7689	9.3953	59	1.63759e-35	20.7724	9.07954	56					6.08788e-40	26.9735	10.0135	61	2.65282e-36	21.8558	9.81853	58					4.77965e-40	27.102	9.97253	61	1.65402e-36	22.0712	9.73544	58
GO:1902221	BP	erythrose 4-phosphate/phosphoenolpyruvate family amino acid metabolic process	126	5.19502e-30	8.92892	13.5283	65	1.51968e-30	9.14431	13.2455	65					5.36809e-35	10.1684	15.5764	74	5.38751e-36	10.5752	15.0529	74					3.97788e-35	10.0929	16.6014	76	1.02537e-35	10.3255	16.2781	76					2.99192e-34	9.81007	16.5334	75	5.8481e-35	10.0872	16.1403	75
GO:0048654	BP	anther morphogenesis	525	5.3989e-33	3.56919	56.3681	156	4.84205e-34	3.65633	55.1894	156					8.54601e-31	3.29383	64.9017	165	5.3377e-32	3.39631	62.7205	164					1.05559e-32	3.34018	69.1724	175	1.05721e-32	3.35883	67.8254	173					2.13121e-32	3.32716	68.8892	174	3.71447e-33	3.39236	67.2514	173
GO:0009733	BP	response to auxin	2945	9.86982e-35	1.90715	316.198	534	2.82944e-34	1.9085	309.586	524					7.3742e-32	1.80513	364.068	583	1.29312e-31	1.81368	351.832	567					3.79045e-35	1.83284	388.024	625	1.71895e-35	1.84531	380.468	617					9.69192e-37	1.85814	386.436	629	7.77689e-37	1.86877	377.248	618
GO:0031012	CC	extracellular matrix	201	2.57396e-34	6.77138	21.3087	89	1.66886e-32	6.51748	20.8797	86					7.79861e-38	7.0662	24.4925	99	7.03709e-35	6.64714	23.6695	94					5.67969e-38	6.97039	26.1062	102	9.59124e-34	6.3213	25.6043	96	1.26191e-05	12.699	0.501931	6	5.90189e-39	7.14019	26.0158	103	7.64628e-35	6.51031	25.3971	97	4.08572e-05	10.2272
GO:0046564	MF	oxalate decarboxylase activity	73	2.5275e-34	20.9003	7.78023	52	6.29808e-31	17.6381	7.6179	49	0.000598136	19.599	0.162335	3	7.12189e-38	25.6075	8.9671	57	1.3657e-34	21.2403	8.66393	54					9.46762e-38	25.8429	9.55301	58	3.9113e-34	20.8745	9.37025	55	0.000843041	17.3643	0.182761	3	7.4955e-38	25.9679	9.51323	58	2.42304e-34	21.0948	9.28532	55
GO:0048656	BP	anther wall tapetum formation	518	3.55859e-33	3.60478	55.6165	155	3.21253e-34	3.69278	54.4536	155					1.6539e-30	3.29921	64.0364	163	1.08338e-31	3.40145	61.8842	162					1.83807e-32	3.34939	68.2501	173	1.89824e-32	3.36735	66.921	171					3.7408e-32	3.33597	67.9707	172	6.74342e-33	3.40095	66.3547	171
GO:0017046	MF	peptide hormone binding	485	2.72192e-34	3.81175	51.6906	150	2.54598e-35	3.90448	50.612	150					3.20219e-30	3.39862	59.5759	155	6.9205e-32	3.53663	57.5617	155					2.24422e-31	3.40618	63.4686	163	2.34588e-32	3.48394	62.2544	163					3.99306e-32	3.45502	63.2044	164	8.03322e-33	3.52114	61.6901	163
GO:1901071	BP	glucosamine-containing compound metabolic process	111	1.8749e-34	11.8434	11.9178	65	5.28569e-35	12.1291	11.6686	65					7.87384e-32	10.4711	13.7221	66	1.0074e-32	10.8897	13.2609	66					3.48199e-32	10.4924	14.625	68	1.03039e-32	10.734	14.3402	68					2.67312e-29	9.41644	14.5651	65	6.53976e-30	9.68215	14.2189	65
GO:0001101	BP	response to acid chemical	1518	1.26424e-37	2.59279	126.914	282	3.76358e-37	2.60022	123.586	276					4.81137e-38	2.48654	148.517	314	2.26084e-37	2.49745	142.642	304					2.20509e-40	2.49751	159.279	335	1.81617e-38	2.46504	155.588	325					3.45072e-38	2.44322	158.967	329	2.88035e-38	2.46461	154.522	323
GO:0046395	BP	carboxylic acid catabolic process	2353	8.61811e-34	2.01114	252.636	447	9.64264e-34	2.02021	247.354	440					5.15224e-35	1.97008	290.883	500	1.52799e-34	1.97652	281.107	486					4.86383e-37	1.97796	310.024	531	1.91589e-35	1.9588	303.987	518					2.65486e-32	1.89707	308.755	513	8.7943e-32	1.89722	301.414	502
GO:1901528	BP	hydrogen peroxide mediated signaling pathway involved in stomatal movement	485	6.25398e-34	3.77919	52.0734	150	5.86292e-35	3.87138	50.9845	150					6.51314e-30	3.37313	59.9568	155	1.45809e-31	3.50935	57.9418	155					4.98097e-31	3.3787	63.9021	163	5.03669e-32	3.4573	62.6577	163					9.02322e-32	3.42687	63.6405	164	1.85839e-32	3.49177	62.1275	163
GO:2000604	BP	negative regulation of secondary growth	485	6.25398e-34	3.77919	52.0734	150	5.86292e-35	3.87138	50.9845	150					6.51314e-30	3.37313	59.9568	155	1.45809e-31	3.50935	57.9418	155					4.98097e-31	3.3787	63.9021	163	5.03669e-32	3.4573	62.6577	163					9.02322e-32	3.42687	63.6405	164	1.85839e-32	3.49177	62.1275	163
GO:0090548	BP	response to nitrate starvation	485	6.25398e-34	3.77919	52.0734	150	5.86292e-35	3.87138	50.9845	150					6.51314e-30	3.37313	59.9568	155	1.45809e-31	3.50935	57.9418	155					4.98097e-31	3.3787	63.9021	163	5.03669e-32	3.4573	62.6577	163					9.02322e-32	3.42687	63.6405	164	1.85839e-32	3.49177	62.1275	163
GO:1902025	BP	nitrate import	485	6.25398e-34	3.77919	52.0734	150	5.86292e-35	3.87138	50.9845	150					6.51314e-30	3.37313	59.9568	155	1.45809e-31	3.50935	57.9418	155					4.98097e-31	3.3787	63.9021	163	5.03669e-32	3.4573	62.6577	163					9.02322e-32	3.42687	63.6405	164	1.85839e-32	3.49177	62.1275	163
GO:0010584	BP	pollen exine formation	683	4.59332e-33	3.15336	72.63	184	9.91841e-34	3.20615	71.11	183					1.87451e-30	2.90469	83.72	195	1.67846e-30	2.93538	80.89	191					7.89135e-33	2.95921	89.24	208	4.04611e-32	2.94379	87.5	204					4.85643e-33	2.97133	88.93	208	1.34997e-32	2.97161	86.8	204
GO:0010234	BP	anther wall tapetum cell fate specification	487	1.04717e-33	3.75664	52.2881	150	9.86597e-35	3.84828	51.1948	150					1.08355e-29	3.3527	60.2041	155	2.44858e-31	3.48809	58.1807	155					8.54258e-31	3.35773	64.1656	163	8.68884e-32	3.43584	62.9161	163					1.55907e-31	3.40554	63.903	164	3.21392e-32	3.47009	62.3837	163
GO:0007172	BP	signal complex assembly	487	1.04717e-33	3.75664	52.2881	150	9.86597e-35	3.84828	51.1948	150					1.08355e-29	3.3527	60.2041	155	2.44858e-31	3.48809	58.1807	155					8.54258e-31	3.35773	64.1656	163	8.68884e-32	3.43584	62.9161	163					1.55907e-31	3.40554	63.903	164	3.21392e-32	3.47009	62.3837	163
GO:0010068	BP	protoderm histogenesis	492	9.99989e-34	3.7376	52.8249	151	9.31341e-35	3.82878	51.7204	151					1.13986e-29	3.33433	60.8222	156	2.53511e-31	3.469	58.7781	156					9.67753e-31	3.33728	64.8244	164	9.76239e-32	3.41492	63.5621	164					1.77407e-31	3.38455	64.559	165	3.59787e-32	3.44897	63.0241	164
GO:0010480	BP	microsporocyte differentiation	492	9.99989e-34	3.7376	52.8249	151	9.31341e-35	3.82878	51.7204	151					1.13986e-29	3.33433	60.8222	156	2.53511e-31	3.469	58.7781	156					9.67753e-31	3.33728	64.8244	164	9.76239e-32	3.41492	63.5621	164					1.77407e-31	3.38455	64.559	165	3.59787e-32	3.44897	63.0241	164
GO:0009945	BP	radial axis specification	488	1.35317e-33	3.74546	52.3955	150	1.27808e-34	3.83683	51.2999	150					1.39558e-29	3.34257	60.3277	155	3.16852e-31	3.47756	58.3002	155					1.117e-30	3.34734	64.2974	163	1.13945e-31	3.42521	63.0453	163					2.04615e-31	3.39497	64.0342	164	4.21998e-32	3.45936	62.5117	163
GO:0048527	BP	lateral root development	546	1.37961e-37	3.77705	57.9311	167	2.75666e-35	3.67049	56.6941	161					1.27247e-37	3.61458	66.8007	181	2.56045e-37	3.6354	64.5611	177					1.16504e-36	3.4959	71.2395	186	9.89209e-37	3.52	69.8246	184					3.79084e-33	3.3125	70.9566	179	1.95301e-33	3.35132	69.2425	177
GO:0009698	BP	phenylpropanoid metabolic process	2288	7.57661e-26	2.49903	96.0182	205	1.89087e-23	2.41606	93.9508	196	0.000688081	2.90976	5.13663	14	4.36692e-33	2.6784	109.954	242	7.38356e-30	2.58616	106.151	229	0.000665281	2.31738	9.50609	21	3.91845e-35	2.70325	117.244	257	3.00272e-32	2.61688	114.924	247	9.31374e-05	3.11428	5.87043	17	1.23301e-37	2.79209	116.763	262	4.01229e-34	2.6891	113.921	250	0.000115341	2.83904
GO:1901529	BP	positive regulation of anion channel activity	490	2.25343e-33	3.72331	52.6102	150	2.13901e-34	3.81414	51.5101	150					2.30848e-29	3.32251	60.575	155	5.29053e-31	3.45668	58.5391	155					1.90392e-30	3.32675	64.5609	163	1.95359e-31	3.40415	63.3037	163					3.51346e-31	3.37403	64.2966	164	7.25318e-32	3.43809	62.7679	163
GO:1903793	BP	positive regulation of anion transport	490	2.25343e-33	3.72331	52.6102	150	2.13901e-34	3.81414	51.5101	150					2.30848e-29	3.32251	60.575	155	5.29053e-31	3.45668	58.5391	155					1.90392e-30	3.32675	64.5609	163	1.95359e-31	3.40415	63.3037	163					3.51346e-31	3.37403	64.2966	164	7.25318e-32	3.43809	62.7679	163
GO:0048645	BP	animal organ formation	624	5.55901e-33	3.47854	59.2261	161	4.6861e-34	3.56381	57.9833	161					1.58948e-30	3.19902	68.208	170	8.86409e-32	3.30018	65.9081	169					5.42029e-29	3.1839	66.8499	164	5.6611e-30	3.25832	65.5417	164					1.85391e-31	3.19504	72.3883	178	1.01383e-31	3.2307	70.6775	176
GO:0045851	BP	pH reduction	525	5.3989e-33	3.56919	56.3681	156	4.84205e-34	3.65633	55.1894	156					9.207e-30	3.23504	64.9017	163	1.81431e-31	3.3658	62.7205	163					4.03813e-30	3.19697	69.1724	170	3.91104e-31	3.2714	67.8254	170					2.3423e-31	3.26943	68.8892	172	4.2431e-32	3.33331	67.2514	171
GO:0050403	MF	trans-zeatin O-beta-D-glucosyltransferase activity	196	6.6231e-28	5.83465	20.8894	80	9.59592e-28	5.84922	20.4535	79					4.32891e-32	6.24599	24.076	91	3.03424e-33	6.49772	23.2621	91					4.00888e-33	6.30372	25.6492	95	8.43869e-34	6.44658	25.1585	95					1.80345e-32	6.2054	25.5424	94	1.65884e-32	6.25223	24.9304	93
GO:0050502	MF	cis-zeatin O-beta-D-glucosyltransferase activity	196	6.6231e-28	5.83465	20.8894	80	9.59592e-28	5.84922	20.4535	79					4.32891e-32	6.24599	24.076	91	3.03424e-33	6.49772	23.2621	91					4.00888e-33	6.30372	25.6492	95	8.43869e-34	6.44658	25.1585	95					1.80345e-32	6.2054	25.5424	94	1.65884e-32	6.25223	24.9304	93
GO:0050162	MF	oxalate oxidase activity	76	6.31839e-33	18.2868	8.09997	52	1.09779e-29	15.6775	7.93096	49	0.000672785	18.7928	0.169006	3	3.52181e-36	21.5631	9.33561	57	4.31014e-33	18.343	9.01998	54					5.41094e-36	21.5346	9.9456	58	1.3836e-32	17.8915	9.75533	55	0.000947666	16.65	0.190271	3	4.29172e-36	21.6388	9.90419	58	8.60499e-33	18.0803	9.66691	55
GO:0032411	BP	positive regulation of transporter activity	493	4.81012e-33	3.69056	52.9323	150	4.60014e-34	3.78059	51.8255	150					4.87662e-29	3.29285	60.9458	155	1.13344e-30	3.42583	58.8975	155					4.20475e-30	3.29634	64.9562	163	4.35249e-31	3.37303	63.6913	163					7.84513e-31	3.34309	64.6903	164	1.62201e-31	3.40666	63.1522	163
GO:0048281	BP	inflorescence morphogenesis	517	1.0078e-32	3.58103	55.5091	154	9.29578e-34	3.66843	54.3485	154					4.55849e-29	3.21908	63.9128	160	9.73768e-31	3.34916	61.7648	160					5.52518e-30	3.21328	68.1183	168	5.47225e-31	3.28807	66.7919	168					1.04813e-30	3.25773	67.8395	169	1.99996e-31	3.32087	66.2266	168
GO:0060548	BP	negative regulation of cell death	497	1.15304e-32	3.71024	50.8086	146	1.01206e-33	3.80598	49.6808	146					1.16788e-28	3.30113	58.7177	151	2.50429e-30	3.44001	56.6538	151					9.69445e-30	3.30333	62.6686	159	9.18238e-31	3.38466	61.3713	159					1.74816e-30	3.35186	62.3885	160	3.37979e-31	3.41942	60.8332	159
GO:0010227	BP	floral organ abscission	620	3.59261e-32	3.24431	66.568	172	2.78041e-33	3.32369	65.1761	172					9.77916e-29	2.94131	76.6459	180	4.71827e-30	3.03612	74.0699	179					4.95237e-30	2.95279	81.6893	190	1.21235e-30	2.99842	80.0985	189					8.72993e-30	2.9442	81.3549	189	1.24128e-30	3.005	79.4207	188
GO:0009809	BP	lignin biosynthetic process	640	3.15511e-33	3.25579	68.277	177	2.48492e-33	3.28267	66.847	175					4.50655e-29	2.92111	78.6704	184	2.02397e-30	3.01547	76.0347	183					4.18781e-34	3.10518	83.8765	202	8.61727e-34	3.10763	82.2502	199					6.42635e-32	3.00713	83.5213	197	7.98001e-33	3.0699	81.5399	196
GO:2000027	BP	regulation of animal organ morphogenesis	570	1.62454e-32	3.63718	53.4427	150	1.55988e-33	3.72621	52.3213	150					1.65852e-28	3.24368	61.5476	155	3.89787e-30	3.37509	59.4722	155					1.55671e-29	3.24546	65.6037	163	1.62378e-30	3.32119	64.322	163					2.8796e-30	3.29222	65.3197	164	6.07009e-31	3.3544	63.7759	163
GO:0006559	BP	L-phenylalanine catabolic process	96	4.65748e-33	13.3561	10.3073	59	1.45914e-33	13.678	10.0918	59					5.64414e-33	13.0151	11.8677	62	7.87428e-34	13.5351	11.4689	62					2.18025e-31	12.0927	12.6487	62	7.07787e-32	12.371	12.4024	62					1.72451e-31	12.1503	12.5969	62	4.34939e-32	12.493	12.2974	62
GO:0034767	BP	positive regulation of ion transmembrane transport	499	2.14017e-32	3.62676	53.5765	150	2.07757e-33	3.71523	52.4563	150					2.12263e-28	3.23509	61.6876	155	5.07422e-30	3.36574	59.6143	155					1.99645e-29	3.23715	65.7467	163	2.10319e-30	3.31246	64.4664	163					3.80677e-30	3.28289	65.4776	164	7.89652e-31	3.34549	63.9208	163
GO:0010067	BP	procambium histogenesis	511	1.09103e-31	3.53923	54.8649	151	1.0654e-32	3.62558	53.7177	151					3.62553e-28	3.1845	63.171	157	8.47422e-30	3.31314	61.0479	157					4.03366e-29	3.18234	67.3278	165	4.20436e-30	3.25639	66.0167	165					7.80718e-30	3.22679	67.0522	166	1.57098e-30	3.28887	65.458	165
GO:0009650	BP	UV protection	526	3.02e-31	3.46134	56.4755	153	2.91796e-32	3.54582	55.2946	153					3.84508e-28	3.13945	65.0254	160	8.56779e-30	3.26631	62.84	160					5.24528e-29	3.13202	69.3042	168	5.3337e-30	3.20492	67.9546	168					1.02641e-29	3.17512	69.0204	169	1.97128e-30	3.23689	67.3795	168
GO:0010148	BP	transpiration	550	4.47082e-32	3.43333	59.0523	159	3.97103e-33	3.51718	57.8175	159					9.93215e-28	3.05165	67.9923	164	2.11572e-29	3.17502	65.7072	164					6.02045e-29	3.06343	72.4663	173	5.85741e-30	3.13478	71.0552	173					3.80811e-30	3.1312	72.1697	175	6.64153e-31	3.19326	70.4538	174
GO:0030155	BP	regulation of cell adhesion	503	5.69051e-32	3.58542	54.006	150	5.57939e-33	3.67289	52.8767	150					5.55721e-28	3.19769	62.1821	155	1.35361e-29	3.32683	60.0922	155					5.53112e-29	3.19885	66.2737	163	5.89541e-30	3.27327	64.9832	163					1.06986e-29	3.24393	66.0024	164	2.22451e-30	3.30591	64.4332	163
GO:0080190	BP	lateral growth	504	7.25114e-32	3.57524	54.1134	150	7.12729e-33	3.66245	52.9819	150					7.05324e-28	3.18848	62.3057	155	1.72608e-29	3.31725	60.2117	155					7.11892e-29	3.18942	66.4055	163	7.61002e-30	3.26362	65.1124	163					1.38189e-29	3.23434	66.1337	164	2.87505e-30	3.29616	64.5613	163
GO:0010152	BP	pollen maturation	559	1.15501e-30	3.32565	60.0186	158	1.07467e-31	3.40686	58.7636	158					2.59043e-28	3.06071	69.1049	167	5.15445e-29	3.12949	66.7824	165					1.76847e-29	3.06846	73.6521	176	1.6162e-29	3.08732	72.2179	174					3.33549e-29	3.05735	73.3506	175	5.86584e-30	3.11814	71.6067	174
GO:0009729	BP	detection of brassinosteroid stimulus	510	3.05032e-31	3.5153	54.7576	150	3.04337e-32	3.60106	53.6126	150					2.89482e-27	3.13427	63.0474	155	7.28626e-29	3.26085	60.9285	155					3.1729e-28	3.13395	67.196	163	3.45183e-29	3.20686	65.8875	163					6.29077e-29	3.17793	66.921	164	1.31387e-29	3.23884	65.3299	163
GO:0042446	BP	hormone biosynthetic process	2839	2.2642e-27	2.41215	111.281	232	7.69831e-27	2.40906	108.701	227					1.4376e-31	2.45528	128.658	267	5.84328e-33	2.42126	138.889	286					9.36623e-30	2.39744	131.012	265	3.88964e-31	2.41285	134.555	274					5.86499e-33	2.35835	153.516	306	2.24998e-32	2.35793	149.502	299
GO:0010268	BP	brassinosteroid homeostasis	554	4.27333e-30	3.30754	59.4817	156	4.1199e-31	3.3883	58.238	156					2.42402e-27	3.02015	68.4868	164	1.65548e-28	3.11466	66.1851	163					5.2876e-30	3.10931	72.9934	176	4.88865e-30	3.12821	71.5719	174					9.61032e-29	3.04567	72.6945	173	1.74923e-29	3.10594	70.9662	172
GO:0046527	MF	glucosyltransferase activity	935	8.33301e-28	2.54921	99.6509	215	3.39254e-28	2.57949	97.5717	213					9.58542e-30	2.52378	114.853	241	5.61209e-32	2.62734	110.97	241					3.07576e-31	2.53463	122.357	255	1.46354e-32	2.59309	120.016	255					1.03589e-30	2.51909	121.848	253	1.57756e-31	2.56346	118.928	251
GO:0045184	BP	establishment of protein localization	6056	4.9974e-32	1.59097	650.219	934	6.74396e-34	1.618	636.623	927					1.74227e-28	1.51541	748.657	1030	2.37937e-30	1.54415	723.496	1011					1.75947e-29	1.51143	797.92	1092	1.7729e-31	1.53695	782.382	1085					1.8702e-31	1.53298	794.654	1099	2.34645e-32	1.54813	775.761	1082
GO:0009759	BP	indole glucosinolate biosynthetic process	236	4.66533e-29	5.27038	25.3388	91	5.19411e-29	5.30123	24.809	90					5.76024e-28	4.90534	29.1749	96	2.07554e-28	5.01243	28.1944	95					1.14264e-30	5.15063	31.0946	103	5.94914e-30	5.08947	30.4891	101					1.05573e-28	4.91179	30.9673	100	7.64951e-29	4.96324	30.2311	99
GO:0045548	MF	phenylalanine ammonia-lyase activity	46	1.12525e-29	40.023	4.90261	38	5.13749e-30	40.9822	4.80032	38					1.50657e-30	47.8304	5.6505	40	3.89986e-31	49.7469	5.45946	40					1.80609e-29	44.4728	6.0197	40	8.46669e-30	45.4749	5.90454	40					1.5335e-29	44.6876	5.99464	40	5.92328e-30	45.954	5.85102	40
GO:0048658	BP	anther wall tapetum development	587	1.35503e-29	3.18994	63.0249	161	4.1163e-30	3.23946	61.7071	160					1.27616e-26	2.90414	72.5663	169	8.03643e-28	2.99615	70.1275	168					4.29227e-28	2.92929	77.3413	179	3.62606e-28	2.94883	75.8352	177					8.84947e-29	2.96752	77.0247	180	1.45107e-29	3.0275	75.1934	179
GO:0009942	BP	longitudinal axis specification	519	7.19018e-31	3.46183	55.7239	151	2.54214e-31	3.51271	54.5587	150					2.27267e-26	3.05632	64.16	155	5.96671e-28	3.17975	62.0037	155					9.09445e-28	3.08205	68.3819	164	9.92824e-29	3.15376	67.0502	164					5.74095e-28	3.09689	68.1019	164	1.20666e-28	3.15648	66.4828	163
GO:0009749	BP	response to glucose	1000	2.1002e-28	2.50186	107.368	228	1.15105e-27	2.48921	105.123	223					3.07287e-28	2.40446	123.622	250	1.0073e-27	2.40769	119.468	243					6.08708e-31	2.4558	131.757	268	3.93062e-31	2.47432	129.191	265					1.4305e-25	2.27836	131.218	253	2.36673e-26	2.31863	128.098	251
GO:0006022	BP	aminoglycan metabolic process	132	2.4783e-30	8.63908	14.1725	67	7.01648e-31	8.84753	13.8762	67					1.34553e-27	7.58503	16.3182	68	1.75506e-28	7.88828	15.7697	68					1.8173e-29	7.96315	17.3919	72	5.21929e-30	8.14662	17.0532	72					3.1952e-25	6.86833	17.3207	67	7.96156e-26	7.06219	16.9089	67
GO:0015833	BP	peptide transport	5893	2.82835e-31	1.59394	625.558	901	1.77661e-33	1.62551	612.382	896					4.2689e-27	1.50977	719.95	989	2.45412e-29	1.54358	695.594	973					9.70305e-29	1.51329	767.797	1053	7.40813e-31	1.54085	752.628	1047					8.50594e-30	1.52573	764.503	1055	1.22222e-31	1.55121	746.474	1044
GO:0009682	BP	induced systemic resistance	336	3.74824e-27	4.05768	35.9146	109	1.08569e-26	4.04357	35.1586	107					5.5296e-31	4.21477	41.3538	124	4.7876e-28	4.00165	39.9548	117					1.14866e-32	4.27942	44.0833	131	8.89651e-30	4.05661	43.2193	125					1.57945e-28	3.9318	43.9066	124	1.54558e-26	3.7891	42.856	119
GO:0035556	BP	intracellular signal transduction	2004	2.31332e-27	1.99849	200.728	357	2.55953e-28	2.03247	196.042	354					2.12723e-27	1.94373	227.99	392	3.93831e-29	1.99916	219.523	387					3.01734e-27	1.91289	243.433	411	6.85329e-29	1.95758	238.133	410					1.25955e-28	1.94364	242.794	415	4.4098e-30	1.98596	236.549	412
GO:0080062	MF	cytokinin 9-beta-glucosyltransferase activity	161	2.03039e-23	5.86821	17.1591	66	6.32476e-24	6.00937	16.8011	66					1.21739e-27	6.43429	19.7768	76	1.30761e-28	6.69317	19.1081	76					4.44134e-29	6.61008	21.069	80	1.18288e-29	6.75965	20.6659	80					2.19996e-28	6.47828	20.9812	79	4.28824e-29	6.66262	20.4786	79
GO:0047807	MF	cytokinin 7-beta-glucosyltransferase activity	161	2.03039e-23	5.86821	17.1591	66	6.32476e-24	6.00937	16.8011	66					1.21739e-27	6.43429	19.7768	76	1.30761e-28	6.69317	19.1081	76					4.44134e-29	6.61008	21.069	80	1.18288e-29	6.75965	20.6659	80					2.19996e-28	6.47828	20.9812	79	4.28824e-29	6.66262	20.4786	79
GO:0016139	BP	glycoside catabolic process	213	8.96468e-23	4.74623	22.8693	77	2.44373e-23	4.86091	22.3911	77					4.75981e-27	5.13154	26.3316	89	3.9831e-28	5.3372	25.4466	89					1.41055e-28	5.24953	28.0642	94	3.1101e-29	5.37076	27.5177	94					5.40914e-28	5.17435	27.9493	93	8.71785e-29	5.32079	27.2848	93
GO:0051649	BP	establishment of localization in cell	6231	2.10121e-30	1.56452	669.009	948	1.74778e-32	1.59372	655.02	942					3.11721e-27	1.49454	770.291	1048	3.6584e-29	1.5237	744.403	1029					2.61686e-28	1.49202	820.978	1112	3.85247e-30	1.51567	804.99	1104					2.80219e-28	1.49261	817.617	1108	1.45899e-29	1.51158	798.178	1093
GO:0006898	BP	receptor-mediated endocytosis	551	2.43322e-29	3.27251	59.1596	154	2.44282e-30	3.35239	57.9226	154					2.9964e-25	2.91128	68.1159	159	7.80826e-27	3.02892	65.8267	159					6.36139e-27	2.95185	72.5981	169	6.80214e-28	3.02057	71.1844	169					1.18801e-26	2.94044	72.3009	168	2.37622e-27	2.99811	70.5819	167
GO:0005496	MF	steroid binding	531	1.68477e-29	3.34898	56.5932	150	1.76516e-30	3.43046	55.4124	150					1.63999e-25	2.98051	65.2264	155	4.39582e-27	3.10156	63.0212	155					2.17272e-26	2.97807	69.4883	163	2.58946e-27	3.04606	68.1589	163					4.54699e-27	3.0196	69.199	164	9.42359e-28	3.07859	67.5412	163
GO:0015020	MF	glucuronosyltransferase activity	272	3.23481e-22	4.04618	28.9894	88	3.25112e-22	4.07393	28.3845	87					7.8044e-26	4.25715	33.4117	101	2.32476e-26	4.35897	32.282	100					4.39366e-28	4.41523	35.5948	108	8.5833e-29	4.51543	34.9138	108					3.0905e-28	4.4367	35.4466	108	1.80406e-28	4.4931	34.5974	107
GO:0051020	MF	GTPase binding	736	6.91402e-26	2.71628	78.4418	178	6.14577e-27	2.78263	76.8051	178					1.79533e-25	2.59301	90.408	194	7.25085e-27	2.67957	87.3514	193					1.22239e-29	2.72828	96.3153	212	8.69058e-31	2.79091	94.4726	212					3.2031e-25	2.54228	95.9142	201	4.08779e-26	2.59739	93.6164	200
GO:0051555	BP	flavonol biosynthetic process	236	1.09856e-23	4.58161	25.185	83	1.28218e-23	4.60508	24.6578	82					9.17543e-27	4.76272	29.0236	94	6.87646e-28	4.95491	28.0416	94					3.84298e-30	5.09218	30.936	102	3.86984e-30	5.12061	30.3296	101					1.69433e-27	4.76981	30.8154	98	2.53866e-28	4.90569	30.078	98
GO:0042401	BP	cellular biogenic amine biosynthetic process	403	3.07227e-29	3.83014	43.2692	126	9.22394e-28	3.7423	42.3645	122					1.25533e-29	3.69471	49.8198	137	1.05933e-27	3.59117	48.1454	131					4.42924e-33	3.87165	53.0981	148	6.04256e-30	3.66998	52.0641	141					4.7639e-27	3.44728	52.8807	137	1.90773e-26	3.42764	51.6234	134
GO:0016710	MF	trans-cinnamate 4-monooxygenase activity	202	2.21805e-25	5.31958	21.5289	78	3.12046e-25	5.33404	21.0797	77					1.23465e-25	5.12487	24.8131	84	6.2218e-26	5.22278	23.9742	83					1.66405e-29	5.60242	26.4344	92	1.21362e-28	5.50324	25.9286	90					5.47289e-26	5.08886	26.3243	87	5.13808e-26	5.12836	25.6936	86
GO:0071705	BP	nitrogen compound transport	6146	1.21642e-25	1.53555	605.29	848	5.11317e-28	1.57143	592.197	845					6.77789e-26	1.5026	701.714	961	7.27708e-29	1.54595	677.397	949					1.56504e-27	1.50595	750.346	1026	8.59518e-30	1.53584	735.289	1021					9.17167e-28	1.5097	746.605	1023	4.5618e-30	1.54104	728.836	1015
GO:0080018	MF	anthocyanin 5-O-glucosyltransferase activity	173	1.15653e-20	5.08184	18.4381	65	3.79785e-21	5.20408	18.0534	65					1.10757e-26	5.90894	21.2508	78	1.16276e-27	6.14673	20.5323	78					5.95649e-28	6.03114	22.6393	82	1.56965e-28	6.16763	22.2062	82					4.46782e-28	6.0604	22.5451	82	8.3546e-29	6.23291	22.0049	82
GO:0050505	MF	hydroquinone glucosyltransferase activity	155	3.45208e-22	5.78199	16.5197	63	1.1376e-22	5.92103	16.175	63					1.56223e-26	6.40442	19.0397	73	1.83586e-27	6.662	18.396	73					4.88627e-28	6.60499	20.2838	77	1.36787e-28	6.75439	19.8957	77					2.44388e-27	6.46705	20.1993	76	5.07157e-28	6.65102	19.7154	76
GO:0006984	BP	ER-nucleus signaling pathway	84	2.94258e-19	8.35573	9.01889	42	1.33875e-19	8.5567	8.83031	42					1.66379e-24	10.4811	10.3843	50	3.50527e-25	10.8993	10.0353	50					1.82433e-28	12.5682	11.0676	55	6.70348e-29	12.8572	10.8521	55					1.48072e-28	12.628	11.0223	55	4.34635e-29	12.984	10.7602	55
GO:0042178	BP	xenobiotic catabolic process	185	7.1508e-23	5.21855	19.863	71	2.09772e-23	5.34454	19.4477	71					2.11846e-26	5.56496	22.8701	81	2.12747e-27	5.78778	22.1015	81					1.67136e-27	5.64496	24.375	85	4.1677e-28	5.7752	23.9004	85					7.0607e-27	5.54897	24.2752	84	1.3235e-27	5.70586	23.6981	84
GO:0010223	BP	secondary shoot formation	568	2.75772e-28	3.16576	60.9849	155	9.15796e-29	3.21384	59.7097	154					4.23604e-25	2.86429	70.2175	162	9.38495e-26	2.92802	67.8576	160					2.72098e-25	2.82527	74.8379	169	3.05783e-26	2.89105	73.3806	169					6.0256e-26	2.86323	74.5316	170	1.17909e-26	2.91989	72.7596	169
GO:0047215	MF	indole-3-acetate beta-glucosyltransferase activity	172	4.11817e-20	5.00296	18.3315	64	1.38128e-20	5.12328	17.949	64					4.10328e-26	5.83247	21.128	77	4.45942e-27	6.06717	20.4136	77					2.17696e-27	5.95691	22.5085	81	5.84932e-28	6.09171	22.0778	81					1.63976e-27	5.98581	22.4147	81	3.142e-28	6.15618	21.8777	81
GO:0046275	BP	flavonoid catabolic process	157	1.14366e-21	5.61145	16.8567	63	3.78562e-22	5.74678	16.5043	63					6.30889e-26	6.20562	19.4087	73	7.60272e-27	6.45387	18.7564	73					2.25208e-27	6.38853	20.6858	77	6.20828e-28	6.5358	20.283	77					1.09669e-26	6.25662	20.6012	76	2.32529e-27	6.43337	20.1114	76
GO:1900000	BP	regulation of anthocyanin catabolic process	157	1.14366e-21	5.61145	16.8567	63	3.78562e-22	5.74678	16.5043	63					6.30889e-26	6.20562	19.4087	73	7.60272e-27	6.45387	18.7564	73					2.25208e-27	6.38853	20.6858	77	6.20828e-28	6.5358	20.283	77					1.09669e-26	6.25662	20.6012	76	2.32529e-27	6.43337	20.1114	76
GO:0080110	BP	sporopollenin biosynthetic process	296	1.01759e-27	4.41851	31.7809	102	3.78343e-27	4.39022	31.1163	100					1.50432e-26	4.11213	36.5922	108	1.58536e-26	4.15273	35.3624	106					6.45555e-28	4.16759	39.0001	114	2.05594e-27	4.14261	38.2406	112					1.94676e-24	3.83756	38.8404	108	1.09357e-24	3.88861	37.917	107
GO:0009960	BP	endosperm development	809	6.20153e-29	2.74096	86.8605	198	4.11574e-30	2.80826	85.0443	198					5.83578e-25	2.4736	100.01	207	7.68795e-27	2.57413	96.6493	207					2.28246e-25	2.45031	106.591	217	1.73037e-26	2.50766	104.516	217					8.5584e-27	2.50992	106.155	220	8.53337e-28	2.56551	103.631	219
GO:0000041	BP	transition metal ion transport	501	5.52917e-23	3.03767	52.8795	131	8.20226e-23	3.04569	51.7863	129					6.3625e-25	3.0333	60.9677	147	2.05312e-25	3.09354	58.929	145					2.16531e-28	3.18365	65.0598	160	8.40842e-28	3.16625	63.8114	157					1.26407e-27	3.14302	64.7348	158	9.90945e-28	3.17028	63.2279	156
GO:0004867	MF	serine-type endopeptidase inhibitor activity	141	5.72604e-32	8.57684	15.0276	71	1.50932e-32	8.78329	14.714	71					5.44191e-29	7.50752	17.32	72	4.81756e-29	7.58987	16.7344	71					5.45386e-29	7.38867	18.4517	74	1.56893e-29	7.55574	18.0987	74					6.73047e-25	6.43786	18.3749	69	1.06063e-24	6.43467	17.9347	68
GO:0010431	BP	seed maturation	1500	2.234e-24	2.06036	161.052	293	7.88792e-25	2.08382	157.684	290					4.53481e-26	2.03997	185.434	330	3.83445e-25	2.03097	179.201	319					1.15134e-29	2.10173	197.635	357	2.31416e-28	2.07853	193.787	348					1.08113e-24	1.97754	196.826	340	2.26696e-24	1.97934	192.147	333
GO:0030003	BP	cellular cation homeostasis	1603	6.84118e-27	2.08798	172.111	316	1.38452e-24	2.03586	168.512	304	0.000290453	3.55084	3.59878	12	7.80911e-29	2.06871	198.167	356	6.7744e-26	2.01104	191.507	338	0.000155559	2.8381	6.66008	18	2.73155e-24	2.03035	176.869	312	2.4085e-25	1.96299	207.094	356	7.54016e-05	3.63469	4.11289	14	1.68489e-31	2.1038	210.342	380	1.8913e-28	2.04286	205.341	364	5.05398e-05	3.40112
GO:0071702	BP	organic substance transport	6823	1.34947e-24	1.81161	259.886	424	1.05444e-23	1.80159	253.838	413					1.067e-31	1.9002	295.752	495	4.41637e-28	1.83894	290.171	475					1.68183e-27	1.79068	321.155	511	2.30983e-26	1.77729	314.201	498					2.82843e-28	1.80663	319.509	512	1.8061e-26	1.78243	311.403	495
GO:0005768	CC	endosome	2840	7.78362e-23	1.71391	301.078	469	2.20903e-24	1.75117	295.017	468					3.30562e-21	1.6394	346.063	516	3.39197e-23	1.68707	334.435	511					4.71077e-27	1.7246	368.864	569	3.70609e-28	1.74953	361.772	565					2.65948e-25	1.69572	367.586	560	6.91747e-26	1.71338	358.845	552
GO:0055082	BP	cellular chemical homeostasis	1780	2.35669e-27	2.03772	190.093	342	6.29775e-25	1.9862	186.193	329	0.000161495	3.5734	3.90014	13	2.04205e-29	2.02041	219.006	386	6.54627e-26	1.95368	211.7	365	6.01007e-07	3.3755	7.96468	25	3.82495e-28	1.96405	233.359	400	3.78066e-25	1.90351	228.886	384	1.2416e-05	3.86784	4.47217	16	3.56879e-31	2.0323	232.553	409	4.05665e-28	1.97502	227.092	392	4.08588e-05	3.32177
GO:0046916	BP	cellular transition metal ion homeostasis	891	2.09355e-25	2.65884	81.1269	181	4.55561e-23	2.56489	79.4241	173	0.000971563	4.19237	2.00032	8	3.27621e-28	2.67861	93.4225	205	1.97905e-25	2.58264	90.2712	194					2.18456e-29	2.5118	117.395	243	6.0999e-25	2.50896	97.6464	203	0.000535049	4.12673	2.28608	9	1.66898e-29	2.6901	99.1391	216	1.16914e-26	2.58806	96.7729	206
GO:0047720	MF	indoleacetaldoxime dehydratase activity	204	2.44257e-24	5.12636	21.742	77	3.40874e-24	5.14038	21.2884	76					1.39179e-24	4.93746	25.0587	83	7.09604e-25	5.03209	24.2115	82					1.23889e-27	5.28676	26.6961	90	8.47107e-27	5.19384	26.1854	88					3.09372e-24	4.80334	26.5849	85	2.92117e-24	4.84066	25.948	84
GO:0022611	BP	dormancy process	1203	9.30997e-24	2.18785	129.163	247	2.55359e-24	2.21844	126.463	245					7.86677e-26	2.17936	148.718	279	1.13843e-24	2.16086	143.72	269					2.39012e-29	2.25055	158.504	302	2.58663e-28	2.23088	155.417	295					1.57629e-24	2.10985	157.855	287	3.73173e-24	2.10994	154.102	281
GO:0009850	BP	auxin metabolic process	1146	9.69302e-25	2.41248	101.461	210	9.81224e-25	2.42624	99.3134	207					1.5195e-28	2.4635	116.858	241	5.32639e-26	2.39296	112.883	229					1.62603e-29	2.45714	124.585	254	1.06233e-27	2.40616	122.13	246					7.69611e-28	2.40152	124.082	249	5.89857e-26	2.3492	121.098	240
GO:0009726	BP	detection of endogenous stimulus	552	3.26364e-27	3.14586	59.267	150	3.61526e-28	3.22261	58.0278	150					2.51244e-23	2.80072	68.2395	155	7.69859e-25	2.91384	65.9461	155					4.61312e-24	2.7936	72.7298	163	5.67427e-25	2.8586	71.3135	163					3.67617e-25	2.85692	72.4321	165	7.79841e-26	2.91269	70.71	164
GO:0010106	BP	cellular response to iron ion starvation	524	9.67507e-28	3.25586	56.2607	146	4.14966e-26	3.17647	55.0843	141					2.34577e-29	3.2148	64.7781	162	5.85618e-27	3.10731	62.601	154					3.00149e-27	3.03899	69.0406	164	2.64827e-25	2.94449	67.6962	158					6.15998e-28	3.0812	68.758	165	1.07753e-25	2.97383	67.1233	158
GO:0055065	BP	metal ion homeostasis	1529	6.84291e-26	2.091	164.165	302	3.85599e-24	2.05206	160.733	292					5.61922e-29	2.10268	189.019	344	3.9998e-27	2.07173	182.666	330					8.93526e-27	2.01779	201.456	353	2.98733e-25	1.98762	197.533	343					1.35024e-30	2.11372	200.632	364	2.19217e-28	2.07087	195.862	351
GO:0009934	BP	regulation of meristem structural organization	575	3.61408e-27	3.08474	61.7365	154	3.85189e-28	3.16004	60.4456	154					4.97986e-24	2.79089	71.0829	161	1.12633e-24	2.85303	68.6939	159					3.3358e-24	2.75266	75.7602	168	1.10493e-24	2.79275	74.2849	167					2.13837e-24	2.76592	75.4501	168	4.38341e-25	2.82061	73.6563	167
GO:0016711	MF	flavonoid 3'-monooxygenase activity	211	1.15381e-24	5.06129	22.4881	79	1.54273e-24	5.07836	22.0189	78					4.22859e-24	4.76097	25.9186	84	2.0658e-24	4.85483	25.0423	83					9.61724e-28	5.17792	27.6121	92	6.16163e-27	5.09314	27.0839	90					1.02072e-23	4.62663	27.4972	86	9.25759e-24	4.66511	26.8384	85
GO:1901657	BP	glycosyl compound metabolic process	1836	2.95857e-10	1.60841	155.83	233	1.29045e-09	1.58808	152.545	226									2.52969e-25	1.92107	219.343	373	0.000286048	2.61396	7.62814	19	5.76007e-29	1.96262	241.906	414	3.39579e-27	1.93186	237.195	402					1.56565e-12	1.63622	190.509	285	1.74596e-26	1.91936	235.188	397	7.35954e-05	3.15779
GO:0004672	MF	protein kinase activity	721	1.21894e-17	2.39225	69.5149	145	2.14282e-17	2.39474	67.8325	142					1.70214e-19	2.39613	80.4282	165	5.19757e-20	2.4477	77.302	162					5.15901e-25	2.61866	85.6574	186	6.98032e-25	2.62872	83.7476	183					2.5938e-18	2.29896	85.6915	169	2.20179e-18	2.31877	83.327	166
GO:1901700	BP	response to oxygen-containing compound	3584	2.79549e-31	1.88799	288.244	486	3.41143e-30	1.88049	280.372	472					6.68269e-29	1.78334	335.854	537	2.20097e-27	1.77264	322.188	514					9.81929e-30	1.7714	359.848	570	1.3056e-28	1.76161	351.347	555					2.68307e-26	1.714	359.974	556	1.76263e-26	1.72727	349.52	544
GO:0009504	CC	cell plate	687	1.953e-24	2.72607	72.8313	166	2.20683e-25	2.79011	71.3651	166					5.62702e-21	2.45557	83.7131	173	1.53795e-22	2.55476	80.9004	173					1.49664e-23	2.53768	89.2288	187	1.58649e-24	2.59601	87.5133	187					5.76283e-25	2.60556	88.9196	190	8.70577e-26	2.66015	86.8051	189
GO:0009817	BP	defense response to fungus. incompatible interaction	683	8.12879e-27	2.84138	73.3322	172	1.78406e-26	2.84209	71.7988	169					3.71268e-28	2.79246	84.4341	191	9.87408e-28	2.7992	81.5964	186					1.7449e-26	2.66921	89.99	195	4.14445e-27	2.7116	88.2376	194					2.3963e-29	2.80123	89.6216	201	2.36314e-29	2.81975	87.4908	198
GO:0006857	BP	oligopeptide transport	609	1.39926e-19	2.87059	50.586	120	1.13743e-21	2.71915	64.0198	146					9.79327e-24	3.02994	58.2321	140	1.19597e-24	3.1189	56.2878	139					6.74397e-25	3.04917	62.0931	148	5.13426e-27	2.84314	78.6774	179					1.19662e-23	2.97462	61.8104	145	1.23197e-25	2.78002	78.0116	175
GO:0071466	BP	cellular response to xenobiotic stimulus	196	3.52267e-21	4.75846	21.0441	71	1.06171e-21	4.87334	20.6041	71					2.22599e-24	5.03174	24.23	81	2.35256e-25	5.23322	23.4157	81					2.38564e-25	5.08461	25.8244	85	6.1415e-26	5.20192	25.3215	85					9.15135e-25	5.00306	25.7186	84	1.78308e-25	5.14452	25.1072	84
GO:0040009	BP	regulation of growth rate	205	5.56404e-24	5.04353	22.0104	77	7.65872e-24	5.058	21.5502	76					1.52708e-23	4.76248	25.3426	82	7.9907e-24	4.85266	24.4909	81					1.64635e-26	5.09625	27.0102	89	1.05033e-25	5.00902	26.4842	87					3.46581e-23	4.63023	26.8996	84	3.30841e-23	4.6653	26.2601	83
GO:0051260	BP	protein homooligomerization	742	4.32557e-25	2.66407	79.6669	178	1.07513e-25	2.70875	78.0011	177					1.12367e-22	2.45531	91.7278	189	3.61854e-23	2.4997	88.645	186					9.06128e-24	2.46403	97.7637	200	2.10737e-24	2.50404	95.8599	199					1.37166e-23	2.45871	97.3634	199	1.19796e-23	2.4763	95.0486	196
GO:0046409	MF	p-coumarate 3-hydroxylase activity	196	1.85079e-23	5.12682	20.8894	74	2.71919e-23	5.13641	20.4535	73					3.65478e-23	4.85816	24.076	79	2.06689e-23	4.94674	23.2621	78					2.85807e-26	5.23347	25.6492	86	2.04461e-25	5.13279	25.1585	84					6.82334e-23	4.73467	25.5424	81	6.90337e-23	4.76722	24.9304	80
GO:0034551	BP	mitochondrial respiratory chain complex III assembly	46	1.38306e-18	15.648	4.93892	30	7.61674e-19	16.0238	4.83565	30					5.16158e-23	22.6457	5.68663	35	1.63658e-23	23.5478	5.49551	35					8.15571e-25	27.1984	6.06082	37	4.03644e-25	27.8228	5.9428	37					1.74107e-23	23.927	6.03601	36	7.56726e-24	24.6002	5.8925	36
GO:0103100	MF	UDP-glucose: 6-methylthiohexylhydroximate S-glucosyltransferase activity	32	2.38821e-20	36.4526	3.41051	26	1.39884e-20	37.325	3.33935	26					6.62491e-22	50.1511	3.93078	28	2.5712e-22	52.1579	3.79789	28					1.15948e-24	99.9577	4.18762	30	6.52502e-25	102.208	4.10751	30					6.89316e-23	64.7195	4.17018	29	3.44359e-23	66.5515	4.07028	29
GO:0103101	MF	UDP-glucose:7-methylthioheptylhydroximate S-glucosyltransferase activity	32	2.38821e-20	36.4526	3.41051	26	1.39884e-20	37.325	3.33935	26					6.62491e-22	50.1511	3.93078	28	2.5712e-22	52.1579	3.79789	28					1.15948e-24	99.9577	4.18762	30	6.52502e-25	102.208	4.10751	30					6.89316e-23	64.7195	4.17018	29	3.44359e-23	66.5515	4.07028	29
GO:0103102	MF	UDP-glucose:8-methylthiooctylhydroximate S-glucosyltransferase activity	32	2.38821e-20	36.4526	3.41051	26	1.39884e-20	37.325	3.33935	26					6.62491e-22	50.1511	3.93078	28	2.5712e-22	52.1579	3.79789	28					1.15948e-24	99.9577	4.18762	30	6.52502e-25	102.208	4.10751	30					6.89316e-23	64.7195	4.17018	29	3.44359e-23	66.5515	4.07028	29
GO:0103103	MF	UDP-glucose: 9-methylthiononylhydroximate S-glucosyltransferase activity	32	2.38821e-20	36.4526	3.41051	26	1.39884e-20	37.325	3.33935	26					6.62491e-22	50.1511	3.93078	28	2.5712e-22	52.1579	3.79789	28					1.15948e-24	99.9577	4.18762	30	6.52502e-25	102.208	4.10751	30					6.89316e-23	64.7195	4.17018	29	3.44359e-23	66.5515	4.07028	29
GO:0102659	MF	UDP-glucose: 4-methylthiobutylhydroximate S-glucosyltransferase activity	32	2.38821e-20	36.4526	3.41051	26	1.39884e-20	37.325	3.33935	26					6.62491e-22	50.1511	3.93078	28	2.5712e-22	52.1579	3.79789	28					1.15948e-24	99.9577	4.18762	30	6.52502e-25	102.208	4.10751	30					6.89316e-23	64.7195	4.17018	29	3.44359e-23	66.5515	4.07028	29
GO:0090704	MF	nicotinate-O-glucosyltransferase activity	32	2.38821e-20	36.4526	3.41051	26	1.39884e-20	37.325	3.33935	26					6.62491e-22	50.1511	3.93078	28	2.5712e-22	52.1579	3.79789	28					1.15948e-24	99.9577	4.18762	30	6.52502e-25	102.208	4.10751	30					6.89316e-23	64.7195	4.17018	29	3.44359e-23	66.5515	4.07028	29
GO:0103099	MF	UDP-glucose:5-methylthiopentylhydroximate S-glucosyltransferase activity	32	2.38821e-20	36.4526	3.41051	26	1.39884e-20	37.325	3.33935	26					6.62491e-22	50.1511	3.93078	28	2.5712e-22	52.1579	3.79789	28					1.15948e-24	99.9577	4.18762	30	6.52502e-25	102.208	4.10751	30					6.89316e-23	64.7195	4.17018	29	3.44359e-23	66.5515	4.07028	29
GO:0046622	BP	positive regulation of organ growth	201	1.69789e-22	4.88327	21.5809	74	2.40656e-22	4.89432	21.1297	73					7.66368e-23	4.72216	24.8481	80	4.21988e-23	4.8094	24.013	79					7.76269e-26	5.06817	26.4831	87	5.06388e-25	4.97728	25.9674	85					3.40878e-23	4.69113	26.3747	83	3.34134e-23	4.72498	25.7477	82
GO:0042335	BP	cuticle development	862	2.92106e-25	2.51997	92.551	198	2.21355e-26	2.58186	90.6158	198					4.19692e-22	2.30103	106.562	209	8.90635e-23	2.3484	102.981	206					1.95311e-23	2.31819	113.574	222	8.67577e-24	2.34316	111.363	220					6.2608e-23	2.30064	113.11	220	1.63173e-23	2.33725	110.42	218
GO:0010305	BP	leaf vascular tissue pattern formation	837	1.61722e-26	2.60193	89.8668	197	3.15101e-27	2.64773	87.9877	196					2.1887e-23	2.37807	103.472	208	1.93409e-24	2.44247	99.9944	206					4.44883e-24	2.36835	110.281	219	1.17467e-23	2.36297	108.133	215					2.62634e-24	2.37982	109.829	219	6.88586e-25	2.41729	107.218	217
GO:0009690	BP	cytokinin metabolic process	274	1.22402e-20	3.84692	29.347	86	3.10904e-21	3.94038	28.7307	86					1.53263e-23	3.9894	33.8173	98	1.19617e-24	4.14943	32.6807	98					5.83352e-27	4.27172	36.0224	107	1.14447e-27	4.37032	35.322	107					1.31038e-24	4.03147	35.8863	103	1.96699e-25	4.14611	35.0299	103
GO:0051792	BP	medium-chain fatty acid biosynthetic process	199	8.43436e-23	4.96156	21.3662	74	1.20844e-22	4.97217	20.9194	73					1.71465e-22	4.70151	24.6009	79	9.68386e-23	4.78726	23.7741	78					1.68469e-25	5.05377	26.2196	86	1.11109e-24	4.96102	25.7091	84					3.41559e-22	4.57707	26.1123	81	3.42924e-22	4.60867	25.4915	80
GO:0009718	BP	anthocyanin-containing compound biosynthetic process	564	8.9947e-24	2.91478	60.5554	145	1.02634e-23	2.92975	59.2892	143					1.23622e-23	2.79223	69.723	158	2.42394e-23	2.80229	67.3797	154					9.29955e-25	2.80536	74.3109	167	1.08124e-25	2.87066	72.8638	167					4.70612e-24	2.77043	74.0067	165	8.02654e-24	2.77567	72.2472	162
GO:0055067	BP	monovalent inorganic cation homeostasis	900	1.96539e-24	2.44564	96.631	202	9.32835e-25	2.47305	94.6105	200					1.13707e-23	2.328	111.26	220	4.61364e-24	2.36345	107.521	216					4.95765e-23	2.26778	118.581	228	4.72365e-23	2.2793	116.272	225					1.80573e-25	2.36167	118.096	234	9.22098e-26	2.38669	115.288	231
GO:1901616	BP	organic hydroxy compound catabolic process	460	1.73015e-25	3.31601	49.3892	130	2.81529e-25	3.32324	48.3565	128					7.72e-25	3.13678	56.8663	140	2.92989e-25	3.19575	54.9551	138					1.34661e-25	3.12949	60.6082	147	1.85631e-25	3.13773	59.428	145					2.48746e-23	2.98788	60.3601	142	7.56303e-24	3.04129	58.925	141
GO:0046244	BP	salicylic acid catabolic process	45	1.1928e-25	29.2324	4.83155	35	1.5915e-24	26.4319	4.73052	34					1.85167e-26	32.9266	5.56301	37	1.6529e-25	29.6075	5.37604	36					5.0005e-24	26.4603	5.92906	36	2.52415e-24	27.0678	5.8136	36					4.33613e-24	26.5861	5.90479	36	1.8781e-24	27.334	5.7644	36
GO:0051240	BP	positive regulation of multicellular organismal process	1430	6.57207e-25	2.21461	131.013	253	3.7218e-25	2.23472	128.264	250					3.48676e-22	2.05443	150.941	271	1.06752e-22	2.08717	145.838	266					3.58997e-24	2.08621	160.842	290	7.36923e-24	2.08597	157.715	285					1.86332e-23	2.06626	160.249	287	4.47497e-24	2.09649	156.421	284
GO:1901141	BP	regulation of lignin biosynthetic process	122	2.26583e-26	8.10346	13.0989	60	6.06116e-26	8.02972	12.825	59					9.33432e-26	7.61895	15.0819	63	6.14433e-24	7.17794	14.575	60					4.23343e-25	7.31615	16.0743	64	7.49268e-24	7.00717	15.7613	62					4.49139e-26	7.59783	16.0085	65	6.57711e-25	7.31326	15.6279	63
GO:0098656	BP	anion transmembrane transport	1699	1.38348e-19	1.85541	182.332	305	4.40011e-20	1.87804	178.517	302					1.53332e-23	1.90473	209.926	354	1.65197e-23	1.91781	202.866	345					3.40192e-23	1.87132	223.748	370	1.37843e-23	1.88848	219.388	366					4.59759e-24	1.89406	222.831	372	1.1242e-23	1.89397	217.53	364
GO:0043090	BP	amino acid import	450	2.49186e-23	3.19933	48.3155	124	3.98903e-24	3.27711	47.3052	124					2.35777e-24	3.13745	55.6301	137	9.7336e-24	3.12686	53.7604	133					3.5299e-26	3.20035	59.2906	146	1.55757e-26	3.24115	58.136	145					5.97253e-22	2.92731	59.0479	137	1.97419e-22	2.97868	57.644	136
GO:1900384	BP	regulation of flavonol biosynthetic process	106	9.33893e-27	9.37512	11.381	56	3.04332e-26	9.24322	11.143	55					1.28279e-24	8.2956	13.104	57	2.27774e-25	8.62686	12.6636	57					5.71618e-26	8.64606	13.9662	60	1.99851e-26	8.84503	13.6943	60					3.22747e-24	8.04569	13.9091	58	9.41716e-25	8.27256	13.5784	58
GO:0046424	MF	ferulate 5-hydroxylase activity	204	3.06302e-22	4.81069	21.742	74	4.30915e-22	4.8221	21.2884	73					7.227e-22	4.54662	25.0587	79	3.97262e-22	4.63204	24.2115	78					8.44526e-25	4.878	26.6961	86	5.38144e-24	4.78996	26.1854	84					1.44035e-21	4.42612	26.5849	81	1.40232e-21	4.45905	25.948	80
GO:0016830	MF	carbon-carbon lyase activity	630	1.97192e-24	2.82196	67.1445	157	5.2862e-24	2.81623	65.7435	154					1.97663e-25	2.76155	77.3873	174	7.2498e-25	2.75912	74.7709	169					8.18851e-26	2.73365	82.4438	182	1.34852e-24	2.68756	80.8665	177					3.77866e-25	2.70407	82.1005	180	3.54795e-24	2.67308	80.1336	175
GO:0046274	BP	lignin catabolic process	91	4.32654e-25	10.2012	9.77047	50	1.65728e-25	10.4468	9.56617	50					3.01989e-25	9.9434	11.2496	53	5.91815e-25	9.88366	10.8716	52					5.72171e-23	8.83137	11.9899	52	2.29581e-23	9.03443	11.7564	52					5.2022e-24	9.28323	11.9408	53	1.54593e-23	9.12345	11.6569	52
GO:0009055	MF	electron transfer activity	1937	1.03615e-24	1.92654	206.443	355	1.43915e-24	1.93216	202.135	349					3.52144e-28	1.94571	237.935	407	4.37867e-25	1.89072	229.891	386	7.1939e-05	2.75919	8.04433	21	6.71688e-27	1.89237	253.482	422	1.58736e-25	1.86995	248.632	411					4.60837e-25	1.85403	252.426	414	3.37966e-25	1.86616	246.379	407
GO:0009612	BP	response to mechanical stimulus	332	1.5338e-24	3.84075	35.5768	104	1.15504e-24	3.87867	34.8309	103					7.98919e-25	3.70159	40.9678	113	1.73508e-25	3.79876	39.5874	112					9.40055e-25	3.62748	43.6657	117	1.72694e-25	3.71166	42.8132	117					6.67294e-25	3.64443	43.4914	117	3.12898e-25	3.69835	42.4548	116
GO:0009626	BP	plant-type hypersensitive response	1570	9.80316e-24	2.05435	155.503	284	1.33097e-24	2.09143	151.932	282					2.64014e-20	1.88954	180.025	304	1.59982e-21	1.93978	173.499	300					3.73024e-22	1.91442	192.274	326	8.72555e-23	1.94042	188.16	323					3.62847e-22	1.9165	191.447	325	1.65817e-22	1.93645	186.552	320
GO:0042542	BP	response to hydrogen peroxide	1670	9.82526e-20	1.94137	155.271	270	1.08879e-20	1.9808	151.981	269					1.27615e-22	1.96594	178.9	310	1.87456e-23	2.00463	172.811	305					1.27601e-25	2.01965	190.735	335	3.52808e-26	2.0433	186.975	332					2.42235e-22	1.93322	189.945	323	7.4355e-23	1.95741	185.373	319
GO:0010497	BP	plasmodesmata-mediated intercellular transport	102	5.36457e-24	8.7007	10.9515	52	1.21185e-21	7.91723	10.7225	49					9.14819e-26	9.03359	12.6095	57	1.11583e-23	8.34015	12.1857	54					2.7036e-25	8.73611	13.4392	58	5.88424e-23	7.93079	13.1775	55					1.88656e-24	8.43359	13.3842	57	3.0752e-22	7.69851	13.066	54
GO:0055114	BP	oxidation-reduction process	6643	7.05215e-26	1.49578	713.996	976	1.47259e-25	1.49694	699.066	957					5.67791e-27	1.47638	822.089	1106	7.15317e-24	1.44924	794.46	1056	2.90102e-05	1.98939	27.6292	50	2.41197e-27	1.46713	874.77	1168	3.15344e-26	1.45949	857.724	1142					5.05049e-23	1.4216	871.089	1137	2.23542e-23	1.43013	850.363	1116
GO:0006855	BP	drug transmembrane transport	433	1.86052e-18	2.89448	46.4902	111	3.39867e-18	2.89244	45.5181	109					4.21165e-25	3.2473	53.5285	135	6.07363e-25	3.26878	51.7295	132					5.32316e-24	3.11495	57.0508	138	8.24598e-24	3.11906	55.9398	136					3.36157e-26	3.26659	56.8172	142	3.62067e-25	3.21892	55.4664	138
GO:0009920	BP	cell plate formation involved in plant-type cell wall biogenesis	203	2.08876e-16	3.94188	21.7957	65	7.38098e-17	4.03698	21.3399	65					3.40299e-21	4.45541	25.0953	78	4.17615e-22	4.63376	24.2519	78					9.72799e-23	4.59087	26.7467	83	2.6741e-23	4.69678	26.2258	83					7.43561e-23	4.61279	26.6372	83	1.5266e-23	4.74321	26.0039	83
GO:0046345	BP	abscisic acid catabolic process	254	1.14961e-23	4.37095	27.2714	87	1.22269e-23	4.39821	26.7012	86					1.37328e-22	4.05913	31.4001	92	5.21544e-23	4.14978	30.3448	91					6.49612e-25	4.24446	33.4663	99	2.66249e-24	4.19951	32.8146	97					1.41334e-22	3.98743	33.3293	95	1.01986e-22	4.03127	32.5369	94
GO:0055072	BP	iron ion homeostasis	765	3.5421e-25	2.63581	82.1363	182	1.09066e-23	2.58231	80.4189	176					8.3745e-26	2.56351	94.5711	201	6.1889e-24	2.50495	91.3927	192					1.33729e-23	2.42851	100.794	204	6.20889e-22	2.36822	98.8313	197					8.36375e-26	2.52419	100.381	209	3.9495e-23	2.42539	97.9949	199
GO:0016115	BP	terpenoid catabolic process	289	8.10276e-25	4.17676	31.0293	96	1.26489e-23	4.07889	30.3805	93					1.07413e-22	3.7837	35.7269	100	1.26946e-22	3.81537	34.5261	98					1.13083e-24	3.90862	38.0778	107	1.41245e-23	3.82236	37.3363	104					4.70188e-23	3.75386	37.9219	104	1.07093e-22	3.74451	37.0203	102
GO:0043621	MF	protein self-association	810	1.40858e-24	2.55639	86.3286	187	1.2115e-25	2.61891	84.5273	187					2.13251e-21	2.32619	99.498	197	3.15586e-21	2.33892	96.134	192					4.4385e-20	2.23464	105.999	202	2.55236e-20	2.25523	103.971	200					4.30819e-22	2.32183	105.558	207	1.31406e-22	2.35731	103.029	205
GO:0016998	BP	cell wall macromolecule catabolic process	168	2.71676e-21	5.28437	18.0378	65	8.81143e-22	5.41185	17.6606	65					9.15337e-19	4.61524	20.7686	66	1.5244e-19	4.79973	20.0706	66					1.71094e-23	5.3504	22.1352	75	5.0947e-24	5.47372	21.7041	75					2.16627e-19	4.64251	22.0446	69	5.79391e-20	4.77358	21.5204	69
GO:0009800	BP	cinnamic acid biosynthetic process	49	5.6869e-21	17.2198	5.26102	33	2.9391e-21	17.6335	5.15101	33					1.78271e-21	17.7922	6.0575	35	5.73042e-22	18.5009	5.85391	35					4.53309e-23	20.3978	6.45609	37	2.26283e-23	20.866	6.33037	37					7.45999e-22	18.4045	6.42966	36	3.27624e-22	18.9223	6.27679	36
GO:0050734	MF	hydroxycinnamoyltransferase activity	73	1.45496e-23	12.0811	7.78023	43	6.30137e-24	12.3709	7.6179	43					3.66558e-22	10.8866	8.9671	44	9.18459e-23	11.323	8.66393	44					4.43081e-22	10.7232	9.55301	45	2.00477e-22	10.9649	9.37025	45					3.37108e-23	11.4239	9.51323	46	1.2106e-23	11.7478	9.28532	46
GO:0071456	BP	cellular response to hypoxia	236	1.56217e-25	4.81107	25.3388	86	1.78953e-25	4.83714	24.809	85					1.15105e-22	4.24889	29.1749	88	9.0647e-22	4.18194	28.1944	85					1.21405e-22	4.16752	31.0946	91	5.45254e-22	4.11222	30.4891	89					9.1164e-23	4.18743	30.9673	91	1.26801e-21	4.07795	30.2311	88
GO:0008202	BP	steroid metabolic process	282	6.81845e-20	3.71299	30.0379	86	2.52652e-19	3.67551	29.4106	84					2.89028e-23	3.90343	34.5961	99	1.45304e-22	3.87061	33.4419	96					4.35431e-24	3.91263	36.9212	104	1.49242e-23	3.88038	36.2102	102					4.48795e-23	3.81585	36.7372	102	4.18296e-22	3.74356	35.8715	99
GO:0009581	BP	detection of external stimulus	370	4.29098e-22	3.41754	39.7261	107	1.02421e-21	3.40802	38.8954	105					1.58312e-22	3.31026	45.7403	117	1.20461e-21	3.27204	44.203	113					8.38118e-23	3.2724	48.7501	122	5.60115e-22	3.22556	47.8007	119					2.02748e-21	3.16767	48.5505	119	9.23619e-21	3.1367	47.3962	116
GO:0008843	MF	endochitinase activity	23	8.15639e-21	184.98	2.45131	22	5.13767e-21	189.404	2.40016	22					1.82919e-19	157.512	2.82525	22	8.61341e-20	163.811	2.72973	22					4.74288e-21		3.00985	23	3.03984e-21		2.95227	23					6.6725e-19	147.181	2.99732	22	3.92465e-19	151.344	2.92551	22
GO:0005783	CC	endoplasmic reticulum	5038	1.1715e-20	1.49759	534.096	738	2.21646e-20	1.49817	523.344	724					3.09739e-19	1.44674	613.896	821	8.31275e-20	1.46196	593.27	801					4.11809e-19	1.43247	654.345	866	3.81966e-19	1.43667	641.764	852					8.13133e-21	1.45652	652.077	874	1.36669e-21	1.47192	636.571	861
GO:0016705	MF	oxidoreductase activity. acting on paired donors. with incorporation or reduction of molecular oxygen	927	2.87095e-21	2.3032	97.4638	195	7.83996e-21	2.29751	95.4141	191					2.83016e-22	2.26133	112.431	218	1.64572e-19	2.16961	108.62	205	4.15277e-05	3.16727	5.99275	18	1.03462e-22	2.70132	73.2759	161	8.23604e-22	2.66509	71.9092	157	7.83699e-05	3.8392	3.61265	13	1.78426e-19	2.52353	73.0636	153	1.20281e-19	2.5492	71.3064	151
GO:0010338	BP	leaf formation	221	1.02978e-19	4.2175	23.7283	74	1.32651e-19	4.23154	23.2321	73					3.20112e-19	3.97165	27.3205	79	1.69465e-19	4.04928	26.4023	78					8.56664e-22	4.22863	29.1183	86	4.24051e-21	4.16282	28.5513	84					7.40452e-19	3.85639	28.9991	81	6.78141e-19	3.88816	28.3096	80
GO:0044433	CC	cytoplasmic vesicle part	1247	1.99351e-19	2.02242	132.199	238	1.60825e-20	2.07041	129.538	238					3.79159e-18	1.91749	151.951	259	9.32187e-20	1.98577	146.845	258					7.02928e-21	1.97953	161.963	281	4.3836e-22	2.02551	158.849	281					1.81474e-18	1.90398	161.401	272	5.49027e-19	1.93054	157.563	269
GO:0009593	BP	detection of chemical stimulus	681	2.11153e-21	2.58169	72.3143	158	2.60905e-22	2.6448	70.801	158					3.22399e-18	2.32577	83.2612	165	1.1746e-19	2.4199	80.4606	165					3.34734e-19	2.33876	88.7445	175	1.0707e-19	2.37455	87.015	174					3.87237e-20	2.38709	88.3809	177	4.47817e-20	2.39827	86.278	174
GO:0009556	BP	microsporogenesis	692	8.22165e-22	2.57586	74.2985	162	2.56188e-22	2.61717	72.7449	161					1.75023e-18	2.31701	85.5467	169	1.44104e-19	2.39158	82.6716	168					1.16259e-18	2.29009	91.1758	177	3.67725e-19	2.3254	89.4003	176					3.29651e-19	2.31893	90.8026	178	1.54394e-19	2.34862	88.6437	176
GO:0009846	BP	pollen germination	1011	4.47654e-22	2.2554	108.549	213	7.95356e-23	2.29681	106.279	212					3.44517e-18	2.03337	124.982	223	1.325e-19	2.10372	120.782	222					1.20366e-18	2.02218	133.206	235	2.26921e-19	2.05788	130.612	234					1.90766e-20	2.09006	132.661	240	3.9894e-21	2.12618	129.507	238
GO:0009643	BP	photosynthetic acclimation	114	6.81543e-23	7.53028	12.2399	54	2.51238e-23	7.71168	11.984	54					7.32992e-21	6.64514	14.093	55	1.45971e-21	6.91044	13.6193	55					1.44097e-19	6.17446	15.0203	55	5.77202e-20	6.31648	14.7278	55					1.87354e-20	6.42638	14.9588	56	5.94097e-21	6.60756	14.6032	56
GO:0071453	BP	cellular response to oxygen levels	245	3.061e-24	4.53808	26.3051	86	3.38392e-24	4.56438	25.7551	85					2.15471e-21	4.00472	30.2875	88	1.48616e-20	3.94612	29.2696	85					2.5003e-21	3.92337	32.2805	91	1.02335e-20	3.87439	31.6518	89					1.88782e-21	3.94211	32.1483	91	2.26879e-20	3.8436	31.384	88
GO:0009742	BP	brassinosteroid mediated signaling pathway	775	3.7097e-20	2.40055	81.6669	169	1.02831e-20	2.4417	79.9165	168					5.5524e-18	2.21354	94.1698	180	8.46327e-19	2.271	90.9418	178					5.63966e-19	2.2255	100.342	191	1.47327e-19	2.26249	98.3413	190					9.84605e-18	2.1707	100.035	187	1.74392e-18	2.21778	97.6138	186
GO:0043295	MF	glutathione binding	57	4.76098e-17	10.7731	6.07497	32	2.57057e-17	11.0312	5.94822	32					1.80581e-20	13.265	7.00171	37	5.52732e-21	13.7964	6.76499	37					1.23924e-20	13.3359	7.4592	38	6.26169e-21	13.6363	7.3165	38					1.36983e-19	12.3937	7.42814	37	5.97491e-20	12.7448	7.25018	37
GO:0047172	MF	shikimate O-hydroxycinnamoyltransferase activity	69	9.71365e-23	12.339	7.35392	41	4.36766e-23	12.6348	7.20048	41					2.01871e-20	10.503	8.47575	41	5.58368e-21	10.9239	8.1892	41					2.10523e-20	10.3756	9.02956	42	1.00668e-20	10.6095	8.85681	42					1.67188e-21	11.086	8.99196	43	6.43574e-22	11.4003	8.77653	43
GO:0047205	MF	quinate O-hydroxycinnamoyltransferase activity	69	9.71365e-23	12.339	7.35392	41	4.36766e-23	12.6348	7.20048	41					2.01871e-20	10.503	8.47575	41	5.58368e-21	10.9239	8.1892	41					2.10523e-20	10.3756	9.02956	42	1.00668e-20	10.6095	8.85681	42					1.67188e-21	11.086	8.99196	43	6.43574e-22	11.4003	8.77653	43
GO:0033218	MF	amide binding	906	2.52787e-20	2.2729	96.5601	191	5.85178e-21	2.31273	94.5454	190					9.921e-19	2.12935	111.29	206	2.20655e-19	2.17384	107.528	203					1.25961e-17	2.05398	118.562	212	1.45635e-18	2.10115	116.294	212					7.93393e-18	2.06409	118.068	212	1.10592e-18	2.11037	115.24	211
GO:0009416	BP	response to light stimulus	7264	3.58538e-22	1.43514	771.044	1019	3.05503e-22	1.44036	754.792	1001					1.70897e-21	1.39991	888.735	1147	4.04851e-20	1.39019	858.675	1104					1.4886e-22	1.40005	947.686	1220	9.21473e-22	1.39493	929.204	1194					2.07806e-21	1.38827	943.968	1208	1.4231e-20	1.38312	921.344	1177
GO:0080134	BP	regulation of response to stress	5061	3.91157e-308	3.97515	543.388	1464	1.99110766019048e-315	4.06435	532.026	1458					1.26457e-21	2.99404	51.7131	126	1.38569e-22	3.09599	49.7327	125					1.54838e-21	2.9312	55.2306	131	1.81989e-21	2.94611	53.967	129					2.93592e-20	2.84794	55.0607	128	8.21257e-21	2.90832	53.5532	127
GO:0030414	MF	peptidase inhibitor activity	269	1.38541e-22	4.11345	28.6696	88	1.40497e-22	4.14129	28.0714	87					3.66228e-23	3.99706	33.0431	96	3.11474e-21	3.82824	31.926	91					9.35336e-25	4.09202	35.2022	102	3.56189e-24	4.05314	34.5287	100					3.50757e-20	3.61239	35.0556	94	4.55221e-17	3.30333	34.2158	87	2.45278e-05	8.78799
GO:0034293	BP	sexual sporulation	710	1.25996e-20	2.49051	76.2311	162	3.97107e-21	2.53061	74.6372	161					2.44639e-17	2.23924	87.7719	169	2.11832e-18	2.31146	84.822	168					1.80773e-17	2.21207	93.5474	177	5.82298e-18	2.24633	91.7258	176					5.36391e-18	2.23979	93.1645	178	2.50009e-18	2.26876	90.9495	176
GO:0048878	BP	chemical homeostasis	1274	3.61007e-20	2.04485	132.585	241	1.25891e-20	2.07046	129.961	239					2.58697e-18	1.91825	152.965	261	5.49649e-19	1.95457	147.985	257					2.46106e-18	1.89299	163.251	274	1.52098e-18	1.90704	160.263	271					3.5151e-19	1.92209	162.466	276	2.27268e-19	1.93755	158.769	272
GO:0009646	BP	response to absence of light	407	3.38894e-22	3.26985	43.6987	114	2.07636e-22	3.30805	42.785	113					2.91972e-20	2.9923	50.3143	120	1.7934e-21	3.11267	48.6233	120					2.28464e-20	2.94792	53.6251	125	1.32271e-20	2.98114	52.5808	124					1.621e-20	2.96206	53.4055	125	1.96157e-20	2.97555	52.1358	123
GO:0009991	BP	response to extracellular stimulus	3123	2.91945e-15	2.37278	61.0416	126	5.92254e-16	2.43083	59.7521	126					2.11357e-19	2.524	70.7218	150	2.17179e-20	2.6038	68.2972	149					3.88307e-19	2.46639	75.5528	156	1.43995e-19	2.50305	74.0363	155					1.54822e-18	2.43611	75.2077	154	3.96789e-19	2.48444	73.3825	153
GO:1901136	BP	carbohydrate derivative catabolic process	475																	1.72337e-18	2.70681	56.3853	126					7.74418e-19	2.65927	62.2173	135	3.85525e-19	2.69294	60.9968	134									1.90856e-19	2.7188	60.4975	134
GO:0015691	BP	cadmium ion transport	165	3.13154e-16	4.41425	17.7157	57	1.21812e-16	4.52064	17.3453	57					2.93761e-17	4.40388	20.3977	63	5.42173e-18	4.57987	19.7122	63					3.61946e-17	4.30711	21.7399	65	1.33946e-17	4.40629	21.3165	65					1.35162e-20	4.90898	21.6509	70	8.57109e-20	4.801	21.1361	68
GO:0006826	BP	iron ion transport	629	4.09774e-21	2.63682	67.5343	150	1.90153e-19	2.5586	66.1222	144					2.27317e-21	2.55111	77.7585	165	3.342e-19	2.45862	75.1451	156					2.18208e-19	2.40802	82.8751	167	1.45536e-17	2.32341	81.2613	160					2.40525e-20	2.45988	82.5358	169	2.78418e-18	2.3666	80.5735	161	0.000879559	4.23751
GO:2000280	BP	regulation of root development	435	8.68234e-22	3.14143	46.5417	118	4.92414e-21	3.10557	45.5617	115					1.38062e-20	2.92929	53.6178	126	6.06586e-20	2.91183	51.8042	122					9.74098e-19	2.75027	57.1622	127	4.14981e-18	2.72033	56.0422	124					2.99582e-20	2.8585	56.914	130	2.62379e-19	2.81138	55.5522	126
GO:0034284	BP	response to monosaccharide	1487	5.9705e-19	1.90305	159.656	273	1.26632e-17	1.8694	156.318	264					1.57913e-17	1.80505	183.826	298	6.72605e-16	1.76656	177.648	284					1.1741e-19	1.84414	195.923	321	4.79524e-19	1.8339	192.107	314					1.38819e-15	1.72592	195.121	304	1.71692e-15	1.73071	190.482	298
GO:0019761	BP	glucosinolate biosynthetic process	1189	2.23106e-15	2.02155	101.406	183	1.07473e-14	2.00018	99.2732	178					8.29014e-20	2.13862	116.881	217	2.90318e-17	2.05276	112.921	204	0.000524496	2.95173	4.94001	14	1.80798e-20	2.13267	124.562	229	1.46036e-18	2.06859	122.136	220	0.000276894	3.80543	3.05067	11	2.39891e-21	2.16754	124.088	231	2.41958e-18	2.06383	121.119	218	2.61693e-05	4.00382
GO:0048471	CC	perinuclear region of cytoplasm	240	2.42103e-12	3.08473	25.4432	64	9.86989e-13	3.15622	24.931	64					1.23938e-16	3.49301	29.2448	78	1.7837e-17	3.63254	28.2621	78					2.44523e-18	3.63203	31.1716	84	7.37285e-19	3.71458	30.5723	84					7.20358e-18	3.57984	31.0636	83	1.66898e-18	3.68089	30.3249	83
GO:0004568	MF	chitinase activity	79	8.04925e-19	8.66627	8.39695	40	3.78588e-19	8.87463	8.22121	40					1.59309e-17	7.75818	9.68181	41	4.59489e-18	8.06984	9.35361	41					2.06108e-17	7.58987	10.3149	42	1.01122e-17	7.76133	10.1171	42					1.32766e-16	7.24722	10.273	41	5.57885e-17	7.45309	10.0263	41
GO:0042802	MF	identical protein binding	996	9.07934e-16	2.0284	102.561	186	9.6429e-16	2.03776	100.337	183					3.55741e-16	1.97973	118.54	208	7.28955e-17	2.02376	114.451	205					5.8362e-19	2.06112	126.311	227	2.16938e-18	2.0484	123.831	222					3.55337e-18	2.03251	125.92	224	3.65633e-18	2.04329	122.839	220
GO:0061135	MF	endopeptidase regulator activity	206	2.83879e-21	4.63776	21.9552	73	8.36165e-22	4.74943	21.4971	73					5.18935e-19	4.11631	25.3044	75	3.05206e-19	4.19222	24.4489	74					8.80087e-22	4.4236	26.9578	82	2.54554e-22	4.52372	26.4421	82					2.14371e-16	3.68506	26.8456	73	2.95264e-15	3.55253	26.2024	70
GO:0009641	BP	shade avoidance	293	2.22481e-16	3.25607	31.4588	82	7.20254e-16	3.2219	30.801	80					2.67059e-16	3.11501	36.2214	89	1.05583e-15	3.084	35.004	86					1.3834e-18	3.28578	38.6048	97	1.30811e-17	3.20735	37.853	94					1.13839e-16	3.10044	38.4467	93	2.44189e-16	3.08793	37.5327	91
GO:0048830	BP	adventitious root development	260	1.99483e-16	3.45933	27.9156	76	2.21768e-16	3.47685	27.3319	75					3.50819e-16	3.28791	32.1418	82	1.64236e-16	3.35855	31.0616	81					3.18537e-18	3.45391	34.2568	89	1.10793e-17	3.41341	33.5897	87					1.04366e-15	3.18034	34.1166	84	8.33925e-16	3.21266	33.3054	83
GO:0097708	CC	intracellular vesicle	3345	1.18614e-14	1.49463	354.615	494	5.55698e-16	1.52755	347.476	493					7.33269e-13	1.42734	407.599	544	1.34768e-14	1.47037	393.904	539					8.01395e-18	1.51072	434.455	604	7.25964e-19	1.53383	426.102	600					7.74303e-16	1.47488	432.949	591	2.54205e-16	1.48914	422.654	582
GO:0009628	BP	response to abiotic stimulus	15043	1.87962e-20	1.31944	1483.49	1784	9.95039e-20	1.31594	1450.36	1742					2.24198e-18	1.27928	1715.85	2017	5.00772e-17	1.27092	1657.76	1942	0.000688898	1.53397	69.8981	94	5.57293e-21	1.29312	1838.09	2172	3.48222e-20	1.28906	1801	2125					1.65398e-20	1.28984	1828.06	2157	7.87219e-20	1.28721	1784.43	2104
GO:0071944	CC	cell periphery	2497	4.63748e-17	1.70448	218.133	341	3.19009e-16	1.69003	212.927	331					4.81518e-21	1.7491	254.196	402									4.97935e-19	1.68073	271.849	415	5.86863e-17	1.63932	265.46	398					6.42142e-19	1.67869	271.423	414					8.14104e-05	1.7406
GO:0042435	BP	indole-containing compound biosynthetic process	171	1.91677e-16	4.38566	18.0171	58	7.27607e-17	4.49222	17.6367	58					3.9558e-16	4.14046	20.7583	62	7.8103e-17	4.30435	20.0655	62					1.08646e-15	4.68314	17.0724	54	4.62549e-17	4.24161	21.7082	65					1.02408e-16	4.1645	22.0559	65	1.31945e-16	4.17528	21.5344	64
GO:0034599	BP	cellular response to oxidative stress	560	1.69183e-15	2.413	60.126	125	3.472e-16	2.47169	58.8687	125					5.71253e-15	2.29464	69.2285	136	3.82616e-16	2.38713	66.9019	136					2.62311e-15	2.28004	73.7839	143	5.20728e-16	2.33299	72.3471	143					8.07682e-16	2.31286	73.4818	144	1.07472e-16	2.3787	71.7348	144
GO:0006744	BP	ubiquinone biosynthetic process	312	1.15982e-15	3.08677	33.4987	84	1.08312e-15	3.10967	32.7983	83					6.69306e-16	2.9861	38.5702	92	2.45544e-16	3.05775	37.2739	91					5.05517e-19	3.22585	41.1082	102	1.33344e-18	3.20434	40.3077	100					1.17553e-16	3.00877	40.9399	97	7.44964e-17	3.04749	39.9665	96
GO:0045735	MF	nutrient reservoir activity	295	6.67431e-22	3.83512	31.4407	92	1.24354e-19	3.62207	30.7846	87	0.000545798	7.9667	0.656009	5	6.47638e-20	3.47331	36.2369	96	1.04538e-17	3.2856	35.0118	90					2.33292e-22	3.64734	38.6046	104	3.30823e-20	3.45787	37.8661	99	0.00093043	7.04734	0.738554	5	1.18144e-17	3.19347	38.4439	95	7.78252e-16	3.03372	37.5229	90
GO:0051049	BP	regulation of transport	1813																	1.48005e-17	1.73162	216.595	340					1.44399e-17	1.70096	238.875	367	1.79457e-17	1.70453	234.224	361					1.85623e-16	1.67311	237.897	361	2.09135e-16	1.67883	232.241	354
GO:0006714	BP	sesquiterpenoid metabolic process	556	5.6705e-15	2.38478	59.6965	123	1.73074e-14	2.36567	58.4482	120					9.69824e-17	2.40903	68.734	140	1.19574e-15	2.36267	66.424	134					3.04249e-18	2.45884	73.2569	150	1.95728e-17	2.42372	71.8303	146					2.10021e-18	2.47067	72.957	150	5.57647e-17	2.40196	71.2224	144
GO:0009620	BP	response to fungus	1155	3.2321e-14	1.92304	107.524	188	6.35132e-15	1.96496	104.894	187					2.79482e-13	1.82145	125.141	207	2.3027e-14	1.88158	120.385	205					6.15367e-15	1.86255	133.787	224	5.77617e-16	1.91094	130.869	224					6.46215e-19	2.01242	133.229	237	2.17956e-19	2.04173	129.734	234
GO:0042351	BP	'de novo' GDP-L-fucose biosynthetic process	50	4.79769e-12	8.33869	5.36839	25	3.00057e-12	8.53883	5.25614	25					1.8593e-16	11.6053	6.18112	31	7.01146e-17	12.0674	5.97338	31					1.01099e-16	11.7532	6.58785	32	5.66479e-17	12.0229	6.45956	32					8.96011e-17	11.809	6.56088	32	4.40864e-17	12.1411	6.40489	32
GO:1900140	BP	regulation of seedling development	980	6.75315e-17	2.06679	105.22	193	7.74983e-18	2.11752	103.02	193					1.19499e-14	1.90885	121.15	206	2.85417e-15	1.94913	117.078	203					1.14485e-16	1.96504	129.122	223	5.06542e-17	1.98726	126.607	221					7.72847e-15	1.89332	128.593	216	1.199e-15	1.93585	125.536	215
GO:1901430	BP	positive regulation of syringal lignin biosynthetic process	59	1.74369e-19	12.1774	6.3347	35	1.06051e-18	11.6274	6.20224	34					1.48769e-18	11.1391	7.29372	36	5.46828e-16	9.38861	7.04859	33					1.12424e-18	11.1242	7.77366	37	6.46746e-17	9.86486	7.62228	35					1.05331e-17	10.4008	7.74184	36	4.76222e-16	9.28896	7.55777	34
GO:1901064	BP	syringal lignin metabolic process	59	1.74369e-19	12.1774	6.3347	35	1.06051e-18	11.6274	6.20224	34					1.48769e-18	11.1391	7.29372	36	5.46828e-16	9.38861	7.04859	33					1.12424e-18	11.1242	7.77366	37	6.46746e-17	9.86486	7.62228	35					1.05331e-17	10.4008	7.74184	36	4.76222e-16	9.28896	7.55777	34
GO:0000302	BP	response to reactive oxygen species	575	2.95254e-14	2.48418	50.0449	107	6.76841e-15	2.54816	48.9318	107					1.42889e-15	2.48441	57.72	121	9.97999e-17	2.58875	55.6903	121					6.39632e-18	2.60036	61.5176	132	1.15205e-18	2.66351	60.259	132					3.59953e-20	2.74794	61.3575	137	1.08374e-20	2.80043	59.8298	136
GO:0048481	BP	plant ovule development	1457	1.34833e-19	1.93406	156.435	271	6.04294e-20	1.95422	153.164	268					1.95308e-16	1.78069	180.118	289	8.24629e-17	1.80448	174.064	283					1.39347e-15	1.73299	191.97	300	1.03438e-15	1.74333	188.232	296					4.65723e-16	1.74901	191.184	301	3.44113e-16	1.76098	186.639	296
GO:0009911	BP	positive regulation of flower development	770	1.95228e-17	2.26043	82.6732	163	6.33578e-18	2.29733	80.9445	162					3.31746e-15	2.07627	95.1892	173	1.38866e-15	2.11135	91.9901	170					1.68134e-15	2.06105	101.453	182	2.3578e-15	2.063	99.4772	179					2.36517e-15	2.05585	101.038	181	1.05882e-15	2.08361	98.6353	179
GO:0009992	BP	cellular water homeostasis	137	2.23752e-18	5.44153	14.7094	54	6.85113e-16	4.91953	14.4018	50	0.000272043	13.696	0.307569	4	8.90022e-18	5.07843	16.9363	57	1.15844e-15	4.67418	16.3671	53					8.25005e-21	5.64254	18.0507	63	2.66514e-18	5.12603	17.6992	59	0.000450868	11.9404	0.351507	4	1.36423e-16	4.7411	17.9768	57	2.10977e-14	4.31459	17.5494	53	0.000935328	9.77429
GO:0000304	BP	response to singlet oxygen	91	1.45977e-13	5.72019	9.77047	37	7.59931e-14	5.85769	9.56617	37					2.0301e-15	6.10168	11.2496	42	6.02552e-16	6.34494	10.8716	42					5.3258e-16	6.1944	11.9899	44	2.5595e-16	6.33672	11.7564	44					2.80891e-15	5.95492	11.9408	43	1.17648e-15	6.12259	11.6569	43
GO:0043288	BP	apocarotenoid metabolic process	502	5.01978e-16	2.55117	53.8986	117	7.34949e-16	2.5544	52.7716	115					2.78941e-16	2.47417	62.0584	129	1.9427e-15	2.43961	59.9727	124					1.19697e-17	2.52154	66.142	138	9.51119e-17	2.47674	64.854	134					2.15172e-17	2.50807	65.8712	137	2.97496e-16	2.45006	64.3051	132
GO:1902644	BP	tertiary alcohol metabolic process	502	5.01978e-16	2.55117	53.8986	117	7.34949e-16	2.5544	52.7716	115					2.78941e-16	2.47417	62.0584	129	1.9427e-15	2.43961	59.9727	124					1.19697e-17	2.52154	66.142	138	9.51119e-17	2.47674	64.854	134					2.15172e-17	2.50807	65.8712	137	2.97496e-16	2.45006	64.3051	132
GO:0016740	MF	transferase activity	16203	2.33596e-08	1.25677	657.484	786	1.95509e-08	1.26142	641.127	769					7.90823e-13	1.31632	762.027	940	1.31142e-13	1.33451	731.802	913					2.76953e-13	1.314	812.402	999	2.01375e-13	1.31936	794.03	980					2.99779e-10	1.266	814.18	974	9.84216e-11	1.27754	791.541	954
GO:0050577	MF	GDP-L-fucose synthase activity	45	1.63414e-11	8.78854	4.79603	23	1.05898e-11	8.99878	4.69596	23					3.96825e-15	11.7977	5.52766	28	1.63339e-15	12.2698	5.34078	28					1.75912e-15	12.074	5.88884	29	1.04905e-15	12.3457	5.77618	29					1.5734e-15	12.1322	5.86432	29	8.21917e-16	12.4757	5.72383	29
GO:0015802	BP	basic amino acid transport	181	4.42893e-16	4.15602	19.4012	60	1.6642e-16	4.25644	18.9945	60					9.55727e-22	4.25557	27.815	84	1.96892e-21	4.25903	26.8802	82					1.16951e-16	3.99425	23.8158	68	4.22426e-17	4.08643	23.3511	68					1.49319e-15	3.82607	23.7207	66	4.52669e-16	3.93425	23.1557	66
GO:0009880	BP	embryonic pattern specification	714	2.59206e-17	2.31376	76.6606	154	9.28964e-18	2.35029	75.0576	153					1.91643e-13	2.0338	88.2664	158	1.11238e-14	2.116	85.2999	158					6.27539e-14	2.0309	94.0745	167	1.12992e-14	2.07819	92.2425	167					4.40174e-14	2.04069	93.6893	167	1.12353e-14	2.08228	91.4619	166
GO:0009725	BP	response to hormone	2899	1.13289e-16	1.79771	166.915	275	5.32984e-15	1.75402	162.637	263					2.63206e-17	1.75964	194.5	312	1.07748e-15	1.72643	186.902	296					1.44955e-18	1.77011	208.19	334	2.36061e-16	1.71711	203.364	319					3.41911e-17	1.7333	207.848	328	1.3663e-15	1.69751	201.927	314
GO:0071214	BP	cellular response to abiotic stimulus	1033	3.34367e-13	1.87864	109.938	187	1.82155e-13	1.89927	107.626	185					3.27654e-17	1.98683	126.562	222	5.43536e-15	1.91265	122.288	209	0.000936854	2.4915	7.11711	17	1.38188e-17	1.97345	135.019	234	4.2756e-17	1.96323	132.372	229					6.48291e-17	1.94992	134.441	231	1.22938e-16	1.94925	131.232	226
GO:0009408	BP	response to heat	2470	1.02219e-17	1.65169	265.198	402	8.98622e-19	1.68284	259.653	400					3.68854e-14	1.52969	305.347	432	4.09265e-15	1.56085	295.085	425					2.71517e-14	1.51816	325.44	456	4.17435e-15	1.54153	319.102	453					3.8478e-15	1.53866	324.107	459	2.52223e-15	1.54859	316.402	451
GO:1901699	BP	cellular response to nitrogen compound	327	6.17667e-14	2.84888	35.1093	83	5.66134e-14	2.87041	34.3751	82					4.39747e-14	2.75233	40.4245	91	5.77329e-15	2.86269	39.0659	91					1.22816e-14	2.75726	43.0845	96	3.5995e-15	2.82096	42.2455	96					1.17857e-15	2.85359	42.9081	98	2.46954e-16	2.93441	41.888	98
GO:0016840	MF	carbon-nitrogen lyase activity	129	1.81612e-15	4.99405	13.7486	48	8.00231e-16	5.11391	13.4618	48					8.91619e-16	4.84639	15.846	52	2.11316e-16	5.04086	15.3102	52					2.62259e-15	4.65341	16.8813	53	1.16221e-15	4.75841	16.5584	53					2.20068e-15	4.67592	16.8111	53	7.90636e-16	4.80862	16.4083	53
GO:0048364	BP	root development	5413	1.99919e-12	1.75268	133.778	215	8.25695e-12	1.73457	130.954	209					1.08106e-16	1.43677	539.745	720	8.43485e-15	1.4115	521.326	687					2.44383e-13	1.71815	165.034	257	1.32038e-12	1.69748	161.811	250					4.93647e-15	1.39827	573.294	747	1.18803e-14	1.39614	559.546	729
GO:0098657	BP	import into cell	855	8.95519e-16	2.10408	91.7994	171	1.27512e-16	2.15558	89.8799	171					1.26093e-13	1.93724	105.697	182	4.49564e-14	1.9729	102.145	179					2.83606e-14	1.94128	112.652	193	1.68731e-14	1.95958	110.458	191					1.41665e-13	1.91092	112.191	190	1.12532e-13	1.92511	109.524	187
GO:0009944	BP	polarity specification of adaxial/abaxial axis	855	3.97455e-15	2.07276	91.7994	169	1.26674e-15	2.10751	89.8799	168					3.29972e-12	1.86884	105.697	177	1.7568e-13	1.94455	102.145	177					3.95227e-13	1.88864	112.652	189	6.5039e-14	1.93273	110.458	189					1.8551e-12	1.85854	112.191	186	4.18898e-13	1.89833	109.524	185
GO:0048508	BP	embryonic meristem development	718	8.89884e-16	2.22898	76.8326	150	1.46288e-16	2.28374	75.2152	150					2.48339e-13	2.02555	88.5213	158	1.43086e-14	2.10791	85.5282	158					1.70211e-13	2.00612	94.3604	166	3.12463e-14	2.05309	92.512	166					1.17621e-13	2.01636	93.9508	166	3.03462e-14	2.05775	91.7034	165
GO:2000022	BP	regulation of jasmonic acid mediated signaling pathway	105	6.77694e-15	5.56857	11.2736	42	3.24443e-15	5.70252	11.0379	42					3.34198e-14	5.13494	12.9803	44	9.78564e-15	5.3397	12.5441	44					1.51765e-12	4.58737	13.8345	43	7.76226e-13	4.69276	13.5651	43					2.03806e-15	5.38815	13.7778	47	8.02666e-16	5.53992	13.4503	47
GO:0034976	BP	response to endoplasmic reticulum stress	2021	2.97205e-14	1.89795	115.342	198	3.60546e-15	1.94593	112.856	198					5.28199e-15	1.87146	132.99	223	1.58451e-15	1.9061	128.328	219					1.05133e-14	1.83554	141.904	233	2.10303e-15	1.86982	139.025	232					2.25286e-13	1.78552	141.168	227	1.06088e-13	1.80718	137.7	224
GO:0009864	BP	induced systemic resistance. jasmonic acid mediated signaling pathway	151	5.4481e-13	4.01393	16.2125	49	2.47302e-13	4.11057	15.8735	49					7.21246e-15	4.2	18.667	56	1.63768e-15	4.36771	18.0396	56					6.60455e-15	4.12981	19.8953	58	2.74915e-15	4.22484	19.5079	58					2.27878e-14	4.03403	19.8139	57	7.99596e-15	4.14778	19.3428	57
GO:0004602	MF	glutathione peroxidase activity	84	1.10183e-16	7.299	8.95259	39	5.38374e-17	7.47397	8.7658	39					1.98325e-15	6.51816	10.3183	40	6.10777e-16	6.77935	9.96946	40					2.70638e-15	6.35738	10.9925	41	1.37939e-15	6.50065	10.7822	41					2.34024e-15	6.38809	10.9467	41	1.00304e-15	6.56915	10.6845	41
GO:0042181	BP	ketone biosynthetic process	383	9.25582e-16	2.7009	45.846	104	1.71512e-15	2.69566	44.8874	102					7.93806e-16	2.60355	52.7868	114	4.9369e-16	2.64307	51.0127	112					2.84287e-16	2.71343	50.4115	111	5.32738e-16	2.70568	49.4282	109					1.86529e-16	2.60944	56.0299	120	1.55034e-14	2.59269	49.0147	105
GO:2001147	MF	camalexin binding	60	3.597e-17	10.2879	6.39471	33	1.91066e-17	10.5344	6.26128	33					2.68242e-16	9.37219	7.37022	34	9.35604e-17	9.74748	7.12104	34					1.84011e-15	8.71465	7.85179	34	1.02421e-15	8.91089	7.70157	34					1.62158e-15	8.75672	7.81909	34	7.76616e-16	9.00473	7.63177	34
GO:2001227	MF	quercitrin binding	60	3.597e-17	10.2879	6.39471	33	1.91066e-17	10.5344	6.26128	33					2.68242e-16	9.37219	7.37022	34	9.35604e-17	9.74748	7.12104	34					1.84011e-15	8.71465	7.85179	34	1.02421e-15	8.91089	7.70157	34					1.62158e-15	8.75672	7.81909	34	7.76616e-16	9.00473	7.63177	34
GO:1901661	BP	quinone metabolic process	383	3.5821e-14	2.68745	41.1219	93	7.64863e-14	2.67405	40.262	91					7.80003e-14	2.55757	47.3474	101	6.33254e-14	2.58847	45.7561	99					3.05669e-16	2.7102	50.4629	111	5.73315e-16	2.70236	49.4802	109					3.06342e-14	2.55192	50.2563	106	1.65027e-14	2.58981	49.0615	105
GO:0043410	BP	positive regulation of MAPK cascade	95	9.15836e-11	4.65076	10.1999	34	5.16476e-11	4.76252	9.98666	34					7.3998e-14	5.4038	11.7441	41	2.32498e-14	5.61921	11.3494	41					2.21673e-14	5.47047	12.5169	43	1.10204e-14	5.59615	12.2732	43					1.04294e-13	5.26668	12.4657	42	4.55239e-14	5.41496	12.1693	42
GO:0019295	BP	coenzyme M biosynthetic process	36	2.81867e-14	14.7519	3.86524	23	1.78705e-14	15.1059	3.78442	23					2.9202e-15	16.1564	4.45041	25	2.02411e-14	14.7813	4.30083	24					4.61091e-17	19.8254	4.74325	27	8.23041e-15	15.3597	4.65088	25					7.49468e-16	17.2614	4.72383	26	6.74117e-15	15.5107	4.61152	25
GO:0000186	BP	activation of MAPKK activity	60	1.06727e-10	6.37658	6.44207	26	6.67719e-11	6.52964	6.30736	26					1.97119e-13	7.60219	7.41734	31	7.7777e-14	7.9049	7.16806	31					1.89961e-14	8.07997	7.90542	33	1.07059e-14	8.2654	7.75147	33					1.33165e-13	7.59021	7.87305	32	6.78105e-14	7.80367	7.68587	32
GO:0046368	BP	GDP-L-fucose metabolic process	57	1.76887e-10	6.51386	6.11996	25	1.12483e-10	6.6702	5.992	25					3.07758e-14	8.47979	7.04648	31	1.19796e-14	8.81744	6.80965	31					2.14856e-14	8.46127	7.51015	32	1.22796e-14	8.65544	7.3639	32					1.91215e-14	8.50146	7.4794	32	9.63744e-15	8.74055	7.30158	32
GO:0042044	BP	fluid transport	1345	6.59991e-16	1.85205	144.41	242	1.3881e-15	1.84875	141.39	237					9.20562e-12	1.65389	166.272	252	1.07121e-11	1.66138	160.684	245					9.47448e-15	1.73966	177.213	278	4.54961e-14	1.72291	173.762	271					9.22275e-14	1.70757	176.488	273	2.63536e-13	1.69914	172.292	266
GO:0045165	BP	cell fate commitment	715	1.48459e-14	2.16476	76.503	146	2.6664e-15	2.2179	74.8928	146					1.43751e-12	1.98667	88.1399	155	3.93936e-13	2.03289	85.1601	153					4.76039e-13	1.98518	93.9637	164	3.75599e-13	1.99908	92.1235	162					6.65636e-13	1.9793	93.5559	163	1.81498e-13	2.01967	91.3184	162
GO:0045927	BP	positive regulation of growth	285	1.34844e-13	2.98947	30.5998	75	1.41297e-13	3.00608	29.96	74					1.07124e-13	2.88179	35.2324	82	4.9417e-14	2.94574	34.0483	81					1.9632e-15	3.01209	37.5507	89	5.60579e-15	2.98117	36.8195	87					1.17877e-13	2.83119	37.397	85	8.91595e-14	2.86232	36.5079	84
GO:0000325	CC	plant-type vacuole	328	6.75605e-14	2.85896	34.4796	82	1.5607e-12	2.73422	33.8087	78					1.45164e-14	2.81136	39.6631	91	1.29706e-13	2.74562	38.3503	87					4.79035e-16	2.89884	42.3031	98	3.47394e-15	2.83452	41.5068	95					1.21777e-16	2.95645	42.1197	99	6.99786e-16	2.90558	41.1544	96
GO:0009856	BP	pollination	2000	2.65739e-12	1.58116	211.645	311	1.3813e-12	1.59584	207.117	307					4.97221e-15	1.62057	244.344	363	8.11946e-15	1.62455	235.94	352					5.36195e-14	1.58529	252.986	368	8.78728e-13	1.55648	247.948	356					1.04182e-17	1.67217	259.259	393	1.05827e-16	1.65426	252.985	381
GO:0051179	BP	localization	1149	3.9888e-16	2.08183	95.7593	178	4.37367e-16	2.0918	93.5995	175					1.31458e-16	2.02877	111.349	200	3.87716e-14	1.87123	122.026	206					4.53457e-15	1.86796	135.224	226	1.21974e-14	1.8591	132.486	221					9.06349e-13	1.77889	134.178	216	9.1412e-13	1.78733	130.951	212
GO:1901363	MF	heterocyclic compound binding	26715	6.85946e-12	1.18694	2830.4	3097	8.2167e-13	1.19794	2771.07	3047					7.18559e-12	1.1747	3263.76	3547	1.61816e-13	1.19258	3152.96	3454					1.38503e-12	1.17603	3477.88	3779	5.09838e-14	1.18994	3411.09	3729					6.34282e-09	1.14163	3463.35	3708	6.11573e-11	1.16327	3380.05	3654
GO:0051186	BP	cofactor metabolic process	6011	2.00787e-15	1.38248	632.816	818	5.37769e-15	1.37959	619.454	800					1.24313e-17	1.38925	729.805	942	4.747e-16	1.37312	704.85	903					2.95282e-15	1.34597	777.768	978	4.5378e-14	1.33186	762.547	952					4.18978e-14	1.32999	775.025	966	2.61204e-13	1.32171	756.264	939
GO:0009734	BP	auxin-activated signaling pathway	1216	1.11904e-15	1.89411	130.559	223	8.20786e-16	1.90802	127.829	220					1.99411e-12	1.71812	150.325	235	3.19894e-12	1.72094	145.273	228					2.16442e-13	1.73441	160.216	251	1.38988e-13	1.74782	157.097	248					2.37044e-15	1.8062	159.561	258	5.27178e-15	1.80231	155.767	252
GO:0048440	BP	carpel development	1706	3.1661e-15	1.72402	183.169	289	1.22083e-15	1.74404	179.339	286					1.5829e-13	1.62873	210.9	315	7.60658e-14	1.64818	203.812	308					1.96618e-13	1.60862	224.777	331	1.80956e-13	1.61493	220.4	326					1.16073e-13	1.61651	223.857	331	6.10379e-14	1.63134	218.535	326
GO:0010075	BP	regulation of meristem growth	1622	1.18241e-13	1.69319	174.151	271	1.80296e-14	1.72725	170.509	270					8.91196e-12	1.58989	200.515	294	7.86773e-13	1.63394	193.776	291					1.08034e-12	1.60288	213.71	314	2.60532e-13	1.62745	209.548	312					1.50968e-13	1.63051	212.835	317	2.47297e-13	1.63049	207.775	310
GO:0010102	BP	lateral root morphogenesis	1066	3.25606e-15	1.94572	114.454	200	7.84136e-16	1.98096	112.061	199					4.09243e-13	1.80611	130.852	213	1.86553e-13	1.82943	127.352	210					1.14228e-13	1.80309	140.453	227	2.71361e-14	1.8348	137.718	226					2.46692e-13	1.79113	139.878	225	7.04281e-14	1.82139	136.552	223
GO:0006082	BP	organic acid metabolic process	11184	1.21299e-13	10.2552	4.61706	25	7.30032e-14	10.5124	4.51514	25					3.17952e-14	10.3608	5.31709	27	1.4098e-13	9.89944	5.13665	26	0.000219089	1.67557	46.4668	70	8.26058e-120	1.91105	1473.57	2274	9.50996e-15	10.7122	5.56686	28					1.4661e-14	10.5077	5.6621	28	8.32243e-14	9.91032	5.53011	27	8.42355e-05	1.86814
GO:0015696	BP	ammonium transport	179	1.04824e-15	4.11939	19.1906	59	4.01474e-16	4.21888	18.7885	59					3.86612e-14	3.69064	22.094	61	8.27957e-15	3.83732	21.3551	61					3.75629e-15	3.78256	23.5561	65	1.44394e-15	3.8698	23.0966	65					4.31596e-14	3.6197	23.4569	63	1.41133e-14	3.72201	22.8982	63
GO:0038023	MF	signaling receptor activity	832	5.12346e-11	1.90578	83.1093	144	3.81267e-11	1.92304	81.2064	142					5.6556e-14	1.99834	96.316	171	8.86286e-15	2.05527	92.7749	169					1.69832e-12	1.89851	102.63	174	5.52085e-13	1.93125	100.487	173					2.51366e-12	1.89122	102.315	173	2.04527e-12	1.90608	99.6807	170
GO:0016131	BP	brassinosteroid metabolic process	868	5.31988e-13	1.95807	93.1952	164	2.86503e-12	1.92955	91.2465	159					5.40549e-16	2.03697	107.304	192	5.92115e-15	2.00527	103.698	184					4.46218e-15	1.96863	114.365	198	3.8709e-14	1.9347	112.138	192					2.28687e-14	1.93873	113.897	195	1.2834e-13	1.91427	111.189	189
GO:0071554	BP	cell wall organization or biogenesis	5829	2.47272e-13	1.68167	174.46	270	8.29335e-17	1.96662	122.987	217					1.75742e-11	2.22052	55.6275	107	2.28824e-12	2.30779	53.7941	107					1.13957e-13	2.34822	59.3598	118	3.0636e-14	2.40046	58.2466	118					2.83565e-11	2.17298	59.1124	111	1.47827e-11	2.20671	57.7301	110
GO:0043455	BP	regulation of secondary metabolic process	345	9.36488e-16	2.9582	37.0419	90	2.36198e-15	2.93851	36.2673	88					1.26575e-12	2.55652	42.6497	91	8.40942e-12	2.50133	41.2163	87					1.66389e-13	2.59455	45.4561	97	3.51818e-13	2.5783	44.571	95					1.81367e-14	2.68303	45.2701	99	2.12681e-13	2.60382	44.1938	95
GO:1901140	BP	p-coumaryl alcohol transport	46	4.06205e-13	9.92766	4.93892	25	2.51639e-13	10.1659	4.83565	25					1.11361e-13	10.103	5.68663	27	4.81455e-14	10.5051	5.49551	27					5.26716e-13	9.38942	6.06082	27	3.26517e-13	9.60477	5.9428	27					4.47278e-15	11.3278	6.03601	29	2.35736e-15	11.6463	5.8925	29
GO:0048443	BP	stamen development	1661	6.40023e-13	1.65965	178.338	273	2.901e-13	1.67773	174.609	270					1.23611e-12	1.61001	205.337	304	6.85126e-13	1.62761	198.436	297					4.91861e-12	1.57442	218.848	317	1.92715e-12	1.59226	214.587	314					7.321e-13	1.60132	217.952	320	6.92261e-13	1.60842	212.771	314
GO:0009624	BP	response to nematode	986	6.92285e-11	1.78761	105.865	173	1.44119e-10	1.77915	103.651	169					1.61379e-15	1.94178	121.892	210	3.90404e-14	1.89734	117.795	200					1.48696e-13	1.83549	129.912	213	1.37245e-13	1.8441	127.383	210					1.11011e-15	1.92416	129.381	220	5.94007e-14	1.86259	126.304	210
GO:0021700	BP	developmental maturation	3232	1.62455e-11	1.43182	342.358	461	1.42057e-11	1.43756	335.043	453					3.47347e-12	1.41987	394.897	525	5.33643e-11	1.39908	381.454	502					1.6666e-15	1.47593	420.977	575	1.45571e-14	1.46142	412.711	560					4.46839e-11	1.38446	419.266	545	2.8691e-10	1.36988	409.148	528
GO:0051302	BP	regulation of cell division	786	2.36577e-14	2.10698	81.955	153	8.92739e-15	2.14053	80.2393	152					4.7585e-11	1.86604	94.3775	158	3.46601e-12	1.94155	91.2023	158					4.04014e-13	1.93352	103.561	177	7.14544e-14	1.9786	101.544	177					1.43479e-13	1.9573	103.137	178	1.14505e-12	1.93812	97.7979	168
GO:0071219	BP	cellular response to molecule of bacterial origin	44	1.02338e-13	10.973	4.72418	25	6.30956e-14	11.2364	4.6254	25					2.54795e-13	10.2683	5.43938	26	1.13471e-13	10.6769	5.25657	26					1.14003e-13	10.4944	5.79731	27	7.02759e-14	10.7351	5.68441	27					1.03068e-13	10.5442	5.77357	27	5.69974e-14	10.8406	5.63631	27
GO:0046864	BP	isoprenoid transport	68	3.30434e-13	6.99082	7.30101	31	1.87402e-13	7.15873	7.14835	31					3.35123e-13	6.70626	8.40632	33	1.26905e-13	6.97335	8.1238	33					2.01332e-12	6.23228	8.95947	33	1.16059e-12	6.37531	8.785	33					3.99052e-14	7.04571	8.92279	35	1.92353e-14	7.24392	8.71065	35
GO:0080168	BP	abscisic acid transport	68	3.30434e-13	6.99082	7.30101	31	1.87402e-13	7.15873	7.14835	31					3.35123e-13	6.70626	8.40632	33	1.26905e-13	6.97335	8.1238	33					2.01332e-12	6.23228	8.95947	33	1.16059e-12	6.37531	8.785	33					3.99052e-14	7.04571	8.92279	35	1.92353e-14	7.24392	8.71065	35
GO:0065008	BP	regulation of biological quality	6861	1.01558e-15	1.38731	640.708	828	2.55115e-14	1.36961	625.471	801					3.18148e-15	1.35265	749.601	946	8.71388e-14	1.3372	722.525	905	4.60065e-05	1.72445	53.4552	81	7.97181e-14	1.32382	792.088	982	1.32906e-12	1.30846	775.755	954					4.80261e-13	1.31234	791.54	975	1.22886e-12	1.30987	770.932	949
GO:0009955	BP	adaxial/abaxial pattern specification	945	3.79749e-12	1.87022	101.463	172	1.27243e-12	1.9021	99.341	171					7.73923e-10	1.70615	116.823	182	5.15105e-11	1.77531	112.897	182					3.04747e-10	1.70633	124.51	193	5.94765e-11	1.74618	122.086	193					1.09984e-09	1.68056	124.001	190	2.76445e-10	1.71706	121.052	189
GO:0042221	BP	response to chemical	21238	4.84549e-13	1.55395	247.37	358	1.22713e-11	2.70066	29.4089	70					1.93552e-13	1.52309	289.602	410	9.31265e-13	1.51561	278.267	393					1.76103e-13	1.50674	310.783	435	1.22042e-12	1.49151	303.658	422	7.04432e-05	1.81913	54.4913	79	6.19549e-13	1.49273	311.69	433	1.68518e-12	1.48877	302.622	420
GO:0004058	MF	aromatic-L-amino-acid decarboxylase activity	31	5.65625e-14	17.6521	3.30393	21	3.7169e-14	18.0743	3.235	21					9.40927e-13	15.0312	3.80795	21	4.77422e-13	15.6322	3.6792	21					3.26388e-12	13.978	4.05676	21	2.23445e-12	14.2923	3.97915	21					3.00753e-12	14.0454	4.03987	21	1.86858e-12	14.4426	3.94308	21
GO:0004837	MF	tyrosine decarboxylase activity	31	5.65625e-14	17.6521	3.30393	21	3.7169e-14	18.0743	3.235	21					9.40927e-13	15.0312	3.80795	21	4.77422e-13	15.6322	3.6792	21					3.26388e-12	13.978	4.05676	21	2.23445e-12	14.2923	3.97915	21					3.00753e-12	14.0454	4.03987	21	1.86858e-12	14.4426	3.94308	21
GO:0002215	BP	defense response to nematode	122	5.86188e-13	4.54593	13.0989	43	1.32532e-12	4.48949	12.825	42					1.97422e-13	4.46172	15.0819	47	4.9494e-12	4.17475	14.575	44					4.71757e-13	4.2919	16.0743	48	9.90047e-13	4.24121	15.7613	47					4.04909e-13	4.31232	16.0085	48	7.26737e-13	4.28299	15.6279	47
GO:1901695	BP	tyramine biosynthetic process	31	6.55205e-14	17.506	3.3284	21	4.30252e-14	17.9259	3.25881	21					1.06698e-12	14.9217	3.83229	21	5.43784e-13	15.5152	3.7035	21					3.73026e-12	13.8683	4.08447	21	2.53687e-12	14.1862	4.00493	21					3.44218e-12	13.9341	4.06774	21	2.14708e-12	14.3256	3.97103	21
GO:0009615	BP	response to virus	1579	3.63987e-10	2.69107	27.734	63	1.50354e-10	2.75793	27.1366	63					1.45314e-10	2.6361	32.0053	70	8.41292e-11	2.69003	30.9074	69					8.74125e-13	2.84953	34.1312	78	9.00699e-13	2.86358	33.4484	77					1.11564e-10	2.609	33.9644	73	3.57593e-11	2.68439	33.1381	73
GO:0010309	MF	acireductone dioxygenase [iron(II)-requiring] activity	40	6.5211e-12	10.2738	4.26314	22	4.27542e-12	10.5195	4.17419	22					1.1765e-11	9.68513	4.91348	23	5.74997e-12	10.0725	4.74736	23					4.58537e-12	9.98663	5.23453	24	3.01141e-12	10.2113	5.13438	24					4.18761e-12	10.0348	5.21273	24	2.46917e-12	10.3187	5.08785	24
GO:0044282	BP	small molecule catabolic process	3351	2.79583e-13	1.46153	359.789	492	2.16304e-13	1.46854	352.266	484					2.58333e-12	1.41263	414.259	548	1.38422e-12	1.42486	400.336	534					1.52036e-14	1.44614	441.518	593	5.09065e-14	1.43962	432.92	580					2.42713e-11	1.38118	439.71	570	2.68722e-11	1.38424	429.256	558
GO:0071366	BP	cellular response to indolebutyric acid stimulus	50	4.79769e-12	8.33869	5.36839	25	3.00057e-12	8.53883	5.25614	25					1.74915e-12	8.34543	6.18112	27	7.69953e-13	8.67759	5.97338	27					7.98495e-12	7.75596	6.58785	27	5.00579e-12	7.93385	6.45956	27					1.00376e-13	9.16951	6.56088	29	5.36318e-14	9.42731	6.40489	29
GO:0080027	BP	response to herbivore	112	8.22259e-10	3.95254	12.0252	36	1.86451e-09	3.8834	11.7737	35					2.34341e-12	4.4353	13.8457	43	6.37172e-11	4.10988	13.3804	40					2.2665e-13	4.61122	14.7568	46	5.18593e-13	4.54518	14.4694	45					8.99542e-13	4.46421	14.6964	45	7.71083e-12	4.25769	14.347	43
GO:0008194	MF	UDP-glycosyltransferase activity	898	2.61816e-12	1.91119	94.924	164	1.81695e-12	1.92828	92.9323	162					1.08428e-11	1.82495	109.41	180	1.08416e-12	1.88647	105.679	179					1.56607e-12	1.84176	116.554	192	2.65809e-13	1.88446	114.296	192					6.78506e-12	1.81355	116.062	189	7.89741e-13	1.86617	113.261	189
GO:0019375	BP	galactolipid biosynthetic process	464	2.85173e-13	2.42184	49.8186	104	1.89538e-13	2.44953	48.777	103					1.04905e-11	2.21865	57.3608	110	6.6004e-12	2.25249	55.433	108					3.89988e-13	2.28996	61.1352	119	5.53694e-13	2.28975	59.9447	117					2.94736e-13	2.30094	60.8849	119	7.26914e-13	2.28582	59.4374	116
GO:0006862	BP	nucleotide transport	296	1.06134e-12	2.84016	31.7809	75	3.71782e-13	2.90877	31.1163	75					3.55599e-13	2.77986	36.5922	83	4.57266e-13	2.79452	35.3624	81					5.33541e-13	2.71497	39.0001	86	1.79196e-13	2.77763	38.2406	86					8.33122e-12	2.59469	38.8404	83	2.36824e-12	2.66807	37.917	83
GO:1990055	MF	phenylacetaldehyde synthase activity	30	3.61319e-13	16.8092	3.19736	20	2.42492e-13	17.2112	3.13064	20					5.21569e-12	14.3137	3.68511	20	2.7389e-12	14.8859	3.56052	20					1.69843e-11	13.3109	3.92589	20	1.18538e-11	13.6102	3.85079	20					1.57156e-11	13.375	3.90955	20	1.00033e-11	13.7533	3.81588	20
GO:0045926	BP	negative regulation of growth	259	1.08568e-12	3.02396	27.4359	68	3.98542e-13	3.0984	26.8503	68					3.97904e-12	2.83463	31.6568	73	1.80503e-11	2.78275	30.573	70					2.98788e-11	2.68383	33.7482	74	3.18463e-11	2.69472	33.079	73					2.43942e-11	2.6972	33.6037	74	7.61768e-12	2.77436	32.7938	74
GO:0004601	MF	peroxidase activity	672	2.77005e-13	2.1386	71.323	135	6.00846e-13	2.12919	69.8268	132					8.12387e-14	2.09803	82.2523	151	9.83122e-13	2.05271	79.4581	144					7.00574e-13	2.01678	87.6427	155	5.1969e-12	1.976	85.9582	150					5.01452e-13	2.02668	87.2761	155	1.27991e-12	2.01462	85.1754	151
GO:0071323	BP	cellular response to chitin	30	8.47045e-11	12.4988	3.22103	18	5.95387e-11	12.7985	3.15368	18					5.87678e-12	14.2095	3.70867	20	3.09911e-12	14.7746	3.58403	20					1.37549e-12	15.4095	3.95271	21	9.32844e-13	15.7627	3.87574	21					1.26852e-12	15.4826	3.93653	21	7.8858e-13	15.9176	3.84294	21
GO:1901137	BP	carbohydrate derivative biosynthetic process	5636	1.50077e-12	1.33875	622.2	785	9.69915e-13	1.34533	609.18	772					1.24159e-10	1.2902	694.945	849	6.16774e-11	1.30006	671.47	826					2.85017e-13	1.32482	740.413	921	5.16093e-13	1.32365	725.916	903					1.07519e-11	1.30036	737.777	905	4.95781e-11	1.29248	720.15	880
GO:0016903	MF	oxidoreductase activity. acting on the aldehyde or oxo group of donors	433	2.85945e-14	2.57212	46.1485	101	3.42676e-13	2.49825	45.1856	97					6.12382e-14	2.45101	53.1884	110	2.44577e-13	2.42587	51.3902	106					3.62613e-12	2.27765	56.6637	110	2.9886e-11	2.21603	55.5797	106					1.19692e-12	2.31702	56.4278	111	7.61735e-12	2.26792	55.0759	107
GO:0019222	BP	regulation of metabolic process	3735	2.89928e-14	1.46569	393.39	536	2.41816e-15	1.49297	384.495	532					7.02745e-12	1.38892	451.777	587	7.11018e-12	1.39763	430.496	563					4.772e-11	1.36022	483.077	616	1.11867e-11	1.37696	472.71	609					4.12425e-10	1.34282	475.032	600	1.08977e-10	1.35954	463.006	591
GO:1900056	BP	negative regulation of leaf senescence	82	1.15804e-13	6.2159	8.80416	35	6.18317e-14	6.36528	8.62007	35					7.07583e-12	5.29689	10.137	35	2.64251e-12	5.5079	9.79634	35					8.4693e-12	5.17381	10.8041	36	4.74853e-12	5.29258	10.5937	36					7.50818e-12	5.19839	10.7598	36	3.69457e-12	5.34465	10.504	36
GO:0016614	MF	oxidoreductase activity. acting on CH-OH group of donors	1110	3.5475e-10	1.70557	118.302	186	6.03705e-10	1.70126	115.834	182					2.45178e-12	1.75488	136.349	217	2.99247e-12	1.76283	131.739	211					1.18081e-11	1.70642	145.258	225	3.20391e-12	1.73572	142.479	224					7.92602e-12	1.71483	144.653	225	7.11863e-12	1.72435	141.188	221
GO:0044267	BP	cellular protein metabolic process	19398	2.53078e-07	1.14556	2082.72	2268	1.05961e-08	1.1649	2039.17	2244					1.54937e-08	1.15121	2398.03	2615	2.30498e-11	1.18457	2317.43	2572					2.25811e-10	1.16667	2555.82	2807	1.51239e-12	1.18953	2506.05	2785					2.40622e-06	1.12049	2545.36	2729	3.65627e-08	1.1445	2484.84	2699
GO:0009967	BP	positive regulation of signal transduction	150	2.24395e-07	2.89026	15.8076	38	1.29157e-07	2.96112	15.47	38					4.51045e-10	3.31275	18.2237	47	1.40338e-10	3.44679	17.6015	47					1.02689e-10	3.37556	19.4197	50	4.99554e-11	3.45464	19.0335	50					3.09834e-10	3.28736	19.3557	49	1.32684e-10	3.38088	18.8901	49
GO:0008559	MF	xenobiotic transmembrane transporting ATPase activity	105	2.46983e-08	3.68651	11.1907	32	1.49409e-08	3.77481	10.9572	32					6.74469e-13	4.77961	12.8979	42	1.0445e-12	4.77632	12.4618	41					5.53202e-12	4.44399	13.7406	42	2.92308e-12	4.54415	13.4778	42					4.82151e-12	4.46546	13.6834	42	9.87193e-12	4.41208	13.3556	41
GO:0010023	BP	proanthocyanidin biosynthetic process	113	3.15504e-12	4.57491	12.1326	40	7.53419e-12	4.50538	11.8789	39					6.08959e-11	4.05163	13.9693	41	2.07622e-11	4.21315	13.4998	41					1.11897e-10	3.91168	14.8885	42	5.98677e-11	4.00154	14.5986	42					5.71434e-12	4.23787	14.8276	44	4.56239e-11	4.04093	14.4751	42
GO:0015692	BP	lead ion transport	54	4.14591e-11	7.18806	5.79786	25	2.61771e-11	7.36058	5.67663	25					1.90437e-11	7.1086	6.67561	27	8.53475e-12	7.39153	6.45125	27					8.39141e-11	6.60648	7.11488	27	5.31978e-11	6.75801	6.97633	27					1.4641e-12	7.70187	7.08575	29	7.93049e-13	7.91841	6.91728	29
GO:0003700	MF	DNA-binding transcription factor activity	4859	6.4564e-10	1.31848	517.865	648	1.15452e-09	1.3162	507.06	634					2.43639e-13	1.36112	596.865	762	3.43448e-12	1.34639	576.686	731					2.88341e-12	1.333	635.864	797	1.41033e-12	1.34121	623.699	786					5.29052e-12	1.32904	633.216	792	1.76675e-12	1.34089	618.046	779
GO:0006598	BP	polyamine catabolic process	264	3.86866e-08	2.40399	28.3451	59	1.10238e-07	2.35478	27.7524	57					1.84603e-11	2.72431	32.6363	73	5.63495e-10	2.57013	31.5394	68					2.44802e-12	2.77879	34.7838	78	5.34737e-11	2.63892	34.1065	74					1.53519e-11	2.69082	34.6414	76	1.3154e-11	2.71565	33.8178	75
GO:0010103	BP	stomatal complex morphogenesis	1017	2.51238e-11	1.79518	109.193	179	8.17764e-12	1.82643	106.91	178					3.93568e-09	1.64311	125.724	190	7.89802e-10	1.68724	121.499	188					5.99367e-09	1.6167	133.997	199	1.25789e-09	1.65449	131.387	199					7.12052e-09	1.61417	133.448	198	2.95293e-09	1.6392	130.276	196
GO:0045551	MF	cinnamyl-alcohol dehydrogenase activity	172	1.82163e-12	3.65158	18.3315	52	3.03352e-12	3.63648	17.949	51					3.52604e-10	3.10752	21.128	52	1.01655e-10	3.23222	20.4136	52					3.59115e-10	3.05183	22.5085	54	1.75401e-10	3.12071	22.0778	54					3.07807e-10	3.0666	22.4147	54	3.94955e-10	3.06882	21.8777	53
GO:0035304	BP	regulation of protein dephosphorylation	612	1.01227e-09	1.95946	65.7091	116	2.92083e-10	2.00707	64.3351	116					4.18515e-10	1.92621	75.6569	130	9.092e-11	1.984	73.1142	129					1.31943e-10	1.93277	80.6353	138	6.78891e-11	1.95892	79.065	137					4.86192e-09	1.83297	80.3051	132	1.08145e-09	1.88509	78.3959	132
GO:0030007	BP	cellular potassium ion homeostasis	135	1.78022e-08	3.26865	14.4946	38	1.00602e-08	3.34724	14.1916	38					1.36827e-11	3.80178	16.689	47	1.61568e-11	3.82532	16.1281	46					3.40961e-11	3.64979	17.7872	48	6.33617e-11	3.61388	17.4408	47					2.94928e-11	3.66715	17.7144	48	4.7245e-11	3.64948	17.2932	47
GO:0000170	MF	sphingosine hydroxylase activity	17	3.56063e-10	27.2912	1.81183	13	2.73118e-10	27.9432	1.77403	13					8.3301e-11	33.3784	2.08823	14	5.21256e-11	34.712	2.01763	14					1.97115e-10	31.0413	2.22467	14	1.51581e-10	31.7389	2.18211	14					1.86245e-10	31.1909	2.21541	14	1.3392e-10	32.0724	2.16233	14
GO:0004709	MF	MAP kinase kinase kinase activity	97	1.73518e-07	3.58536	10.3381	29	1.10443e-07	3.6712	10.1224	29					1.483e-09	4.04391	11.9152	35	5.8805e-10	4.20587	11.5123	35					1.15079e-10	4.2917	12.6937	38	6.49466e-11	4.38839	12.4509	38					1.01733e-10	4.31243	12.6409	38	4.95351e-11	4.43462	12.338	38
GO:0048041	BP	focal adhesion assembly	11	2.01009e-09	83.2495	1.18105	10	1.63067e-09	85.2437	1.15635	10					8.10261e-09	70.974	1.35985	10	5.77989e-09	73.7935	1.31414	10					2.0664e-10		1.44933	11	1.66423e-10		1.4211	11					1.45987e-08	66.2818	1.44339	10	1.15122e-08	68.1417	1.40908	10
GO:0034333	BP	adherens junction assembly	11	2.01009e-09	83.2495	1.18105	10	1.63067e-09	85.2437	1.15635	10					8.10261e-09	70.974	1.35985	10	5.77989e-09	73.7935	1.31414	10					2.0664e-10		1.44933	11	1.66423e-10		1.4211	11					1.45987e-08	66.2818	1.44339	10	1.15122e-08	68.1417	1.40908	10
GO:0007044	BP	cell-substrate junction assembly	11	2.01009e-09	83.2495	1.18105	10	1.63067e-09	85.2437	1.15635	10					8.10261e-09	70.974	1.35985	10	5.77989e-09	73.7935	1.31414	10					2.0664e-10		1.44933	11	1.66423e-10		1.4211	11					1.45987e-08	66.2818	1.44339	10	1.15122e-08	68.1417	1.40908	10
GO:0003714	MF	transcription corepressor activity	103	8.98208e-10	4.14541	10.9776	34	5.16223e-10	4.24472	10.7485	34					2.37006e-09	3.84918	12.6522	36	9.28877e-10	4.00336	12.2245	36					1.28693e-08	3.57905	13.4789	36	7.71374e-09	3.65967	13.221	36					4.56505e-11	4.25186	13.4228	40	2.14733e-11	4.37236	13.1012	40
GO:0016036	BP	cellular response to phosphate starvation	677	2.09187e-11	2.01271	72.688	131	2.11991e-11	2.02219	71.1681	129					3.23081e-10	1.87949	83.6923	141	4.36611e-10	1.88471	80.8796	137					4.30088e-11	1.90688	89.1995	151	7.38495e-11	1.90085	87.4624	148					1.63491e-11	1.93267	88.8343	152	7.74192e-11	1.90296	86.7222	147
GO:0010466	BP	negative regulation of peptidase activity	51	4.43593e-10	6.87523	5.45607	23	2.9069e-10	7.04103	5.34137	23					1.71777e-10	6.85645	6.28647	25	8.17238e-11	7.13047	6.07421	25					6.75668e-10	6.37114	6.7013	25	4.43256e-10	6.51785	6.57022	25					6.20349e-10	6.40068	6.67448	25	3.7196e-10	6.57957	6.5166	25
GO:0009819	BP	drought recovery	116	1.51557e-10	4.06612	12.4547	38	3.40416e-10	4.00236	12.1942	37					3.87153e-11	4.03862	14.3402	42	5.39402e-11	4.04442	13.8582	41					2.90738e-10	3.75291	15.2838	42	6.01649e-10	3.69727	14.9862	41					2.55727e-10	3.77075	15.2212	42	4.64614e-10	3.73366	14.8594	41
GO:0097159	MF	organic cyclic compound binding	26229	4.98843e-08	1.14665	2742.4	2950	1.05297e-08	1.15632	2683.69	2900					2.65724e-08	1.14025	3169.27	3395	1.51868e-09	1.15618	3059.63	3302					7.93683e-09	1.14187	3378.04	3619	6.03548e-10	1.15467	3311.95	3569					7.86404e-06	1.10711	3363.26	3547	2.17547e-07	1.1277	3281.23	3494
GO:0042344	BP	indole glucosinolate catabolic process	75	2.55354e-10	5.25806	8.05258	29	8.23179e-10	5.08726	7.88421	28					1.01546e-11	5.5879	9.27168	33	1.23841e-10	5.20875	8.96007	31					2.94323e-10	4.91786	9.88177	32	8.81155e-10	4.76212	9.68934	31					1.64689e-12	5.81203	9.84132	35	2.67664e-11	5.36438	9.60734	33
GO:0099402	BP	plant organ development	2924	6.87177e-10	1.41775	302.106	404	4.68816e-10	1.42644	295.916	398					1.52012e-09	1.38203	349.268	455	1.27092e-09	1.38972	338.115	443	0.000475637	1.66888	40.0685	61	9.48673e-10	1.37633	372.99	483	1.02333e-09	1.37861	366.043	475					2.45724e-09	1.36607	372.045	479	1.03607e-09	1.37969	363.397	472
GO:0071902	BP	positive regulation of protein serine/threonine kinase activity	128	4.4179e-07	3.01642	13.7431	34	2.69472e-07	3.08891	13.4557	34					4.54466e-09	3.35224	15.8237	41	1.65805e-09	3.48588	15.2919	41					2.62831e-09	3.34479	16.8649	43	1.43451e-09	3.42163	16.5365	43					7.80566e-09	3.24395	16.7958	42	3.81557e-09	3.33528	16.3965	42
GO:0004497	MF	monooxygenase activity	445	2.75173e-11	2.29067	47.8905	96	4.65232e-11	2.28397	46.8846	94					1.11386e-11	2.24155	55.2354	107	4.07888e-10	2.13438	53.3654	100	0.000768154	3.12913	3.98271	12	5.00873e-11	2.17474	57.4896	108	3.731e-10	2.11466	56.4067	104	0.000168088	4.39831	2.40092	10	1.60736e-08	1.97195	57.3114	100	9.43753e-09	2.00207	55.9312	99
GO:0007275	BP	multicellular organism development	18341	4.66838e-10	1.18424	1940.68	2161	3.4246e-10	1.18772	1898.98	2119					5.21556e-11	1.18273	2239.62	2487	2.88342e-10	1.17757	2163.26	2397					3.31633e-11	1.17954	2387.19	2644	7.38304e-11	1.17758	2340.08	2590					5.44775e-09	1.15621	2377.72	2602	3.11006e-09	1.16069	2320.31	2546
GO:1901160	BP	primary amino compound metabolic process	39	3.89905e-11	9.72429	4.18734	21	2.60933e-11	9.95756	4.09979	21					5.5291e-10	8.28873	4.82127	21	2.91993e-10	8.6184	4.65924	21					1.80223e-09	7.7036	5.13852	21	1.25312e-09	7.88018	5.03846	21					1.67082e-09	7.74014	5.11748	21	1.07062e-09	7.95758	4.99582	21
GO:0051403	BP	stress-activated MAPK cascade	61	3.10336e-08	5.04466	6.54943	23	2.08739e-08	5.1657	6.41249	23					6.40132e-10	5.64441	7.54096	27	2.96019e-10	5.86906	7.28752	27					4.80865e-10	5.60556	8.03717	28	3.03992e-10	5.73414	7.88066	28					7.39924e-11	6.01638	8.00427	29	4.10464e-11	6.18553	7.81397	29
GO:0004338	MF	glucan exo-1.3-beta-glucosidase activity	108	4.88996e-11	4.38579	11.5105	37	1.18739e-10	4.30816	11.2703	36					1.71707e-10	4.05041	13.2664	39	1.04014e-09	3.88299	12.8179	37					1.10604e-09	3.76607	14.1332	39	6.2938e-10	3.85093	13.8628	39					2.49153e-10	3.93889	14.0744	40	4.818e-10	3.89151	13.7372	39
GO:0061025	BP	membrane fusion	905	1.08586e-10	1.81694	97.1678	161	4.16256e-11	1.84702	95.1361	160					3.89157e-10	1.73902	111.878	177	2.76239e-10	1.75793	108.118	173					6.516e-10	1.70768	119.24	185	2.38957e-10	1.73544	116.918	184					2.7091e-10	1.72783	118.752	186	2.13148e-10	1.74063	115.929	183
GO:0072722	BP	response to amitrole	10	2.02474e-10		1.07368	10	1.63886e-10		1.05123	10					8.29755e-10		1.23622	10	5.89387e-10		1.19468	10					1.56985e-09		1.31757	10	1.28946e-09		1.29191	10					1.50672e-09		1.31218	10	1.18435e-09		1.28098	10
GO:0071470	BP	cellular response to osmotic stress	627	2.21757e-09	1.92192	67.3196	117	2.52811e-09	1.92681	65.912	115					1.88384e-11	1.9982	77.5112	137	2.99769e-11	2.0006	74.9062	133					7.25856e-10	1.87301	82.6116	138	7.23482e-10	1.88053	81.0029	136					1.49703e-10	1.91762	82.2734	140	2.14603e-10	1.91735	80.3174	137
GO:0051607	BP	defense response to virus	1318	2.09004e-10	1.64858	141.511	216	3.20701e-11	1.68919	138.552	216					4.17429e-08	1.51253	162.934	230	6.05077e-09	1.55722	157.458	228					1.11637e-07	1.47984	173.656	240	2.21468e-08	1.5146	170.274	240					6.31982e-09	1.53395	172.945	246	1.14346e-09	1.57004	168.833	245
GO:0050794	BP	regulation of cellular process	22204	0.000206278	1.11018	1758.42	1878	9.53401e-05	1.11801	1715.06	1840					7.76643e-08	1.15119	2208.89	2404	3.18005e-08	1.15899	2124.2	2322					9.42503e-09	1.15786	2358.85	2574	1.36593e-09	1.16932	2305.58	2531					4.80951e-07	1.13676	2349.92	2537	9.16779e-08	1.14788	2287.1	2484
GO:0010252	BP	auxin homeostasis	166	3.16637e-10	3.29826	17.8231	47	1.5619e-10	3.37765	17.4504	47					3.44599e-10	3.15686	20.5213	51	1.01642e-10	3.28285	19.8316	51					1.04663e-09	3.01745	21.8717	52	5.20148e-10	3.08684	21.4457	52					2.8928e-10	3.11786	21.7821	53	1.19303e-10	3.20575	21.2642	53
GO:0016999	BP	antibiotic metabolic process	3569	3.34713e-10	1.59316	160.74	239	4.5355e-10	1.59427	157.096	234					2.50567e-10	1.56018	185.499	269	1.00031e-09	1.54698	178.766	258					5.81426e-10	1.53081	198.216	282	2.21773e-09	1.51445	194.017	274					1.43766e-09	1.51742	197.444	279	6.4639e-10	1.53615	192.424	275
GO:0032501	BP	multicellular organismal process	3163	2.94113e-09	1.39169	320.345	420	4.05257e-09	1.39182	313.218	411					2.05218e-10	1.39633	370.172	484	1.54772e-10	1.40553	357.908	471					6.59515e-09	1.34704	395.022	501	4.17751e-09	1.35526	387.381	494					1.43983e-11	1.41216	395.343	520	1.89816e-11	1.41406	385.39	508
GO:0003156	BP	regulation of animal organ formation	71	8.206e-09	4.81699	7.62311	26	5.26947e-09	4.93262	7.46372	26					7.39028e-09	4.62817	8.77719	28	3.43885e-09	4.8124	8.4822	28					6.66068e-09	4.56148	9.35474	29	4.23421e-09	4.66613	9.17258	29					2.47825e-10	5.1455	9.31645	31	3.47848e-09	4.712	9.09495	29
GO:0030244	BP	cellulose biosynthetic process	985	3.40489e-09	1.70089	105.757	166	7.53177e-10	1.7425	103.546	166					1.23557e-06	1.521	121.768	173	1.40205e-07	1.58261	117.676	173					2.3975e-08	1.59782	129.781	191	5.49533e-09	1.63514	127.253	191					1.77083e-08	1.60554	129.249	191	4.76414e-09	1.64057	126.176	190
GO:0050691	BP	regulation of defense response to virus by host	48	5.31566e-09	6.48191	5.15365	21	3.63353e-09	6.6374	5.04589	21					1.72255e-09	6.53704	5.93387	23	8.7668e-10	6.7971	5.73445	23					3.55669e-08	5.58709	6.32433	22	2.47927e-08	5.71518	6.20118	22					1.95736e-12	8.53523	6.29844	27	1.0973e-12	8.77515	6.1487	27
GO:0090696	BP	post-embryonic plant organ development	2591	7.75566e-12	1.49007	278.19	388	6.35423e-11	1.46953	272.373	376					6.38327e-12	1.46205	320.306	437	1.17756e-10	1.43593	309.541	417					3.49875e-10	1.40522	341.382	450	8.36129e-10	1.39859	334.734	440					2.22215e-09	1.38441	339.985	443	1.55365e-09	1.39275	331.902	435
GO:0017004	BP	cytochrome complex assembly	148	2.02911e-06	2.6805	15.8904	36	1.23868e-06	2.74493	15.5582	36					1.62824e-08	3.00968	18.2961	44	5.79343e-09	3.12971	17.6812	44					1.2202e-08	2.98193	19.5	46	6.58932e-09	3.05046	19.1203	46					3.23278e-08	2.90215	19.4202	45	1.5591e-08	2.98389	18.9585	45
GO:0010266	BP	response to vitamin B1	25	1.51896e-11	17.7053	2.68419	17	1.75882e-10	15.1651	2.62807	16					9.02113e-12	18.2659	3.09056	18	1.19168e-09	13.1267	2.98669	16					5.08251e-09	11.7341	3.29392	16	3.80211e-09	12.0029	3.22978	16					3.76781e-10	14.0942	3.28044	17	3.3533e-09	12.1208	3.20245	16
GO:0009835	BP	fruit ripening	97	1.3865e-08	3.91724	10.4147	31	8.42676e-09	4.01133	10.1969	31					7.04567e-09	3.83727	11.9914	34	2.92544e-09	3.99012	11.5884	34					9.43755e-09	3.73058	12.7804	35	5.64373e-09	3.81622	12.5315	35					2.80638e-11	4.46703	12.7281	39	2.67696e-10	4.21088	12.4255	37
GO:0004022	MF	alcohol dehydrogenase (NAD) activity	180	3.93321e-08	2.80548	19.1841	45	1.70782e-07	2.70418	18.7839	43					2.08822e-09	2.9129	22.1107	52	1.90032e-09	2.94808	21.3631	51					1.98806e-07	2.67942	20.5293	45	1.13343e-07	2.7399	20.1362	45					1.94024e-09	2.8715	23.4573	54	2.39963e-09	2.87512	22.8953	53
GO:0048513	BP	animal organ development	1458	1.67698e-10	1.61719	156.542	235	3.85955e-11	1.64847	153.269	234					9.84036e-09	1.51085	180.241	254	6.28581e-09	1.52658	174.184	248					2.46258e-09	1.52007	192.102	271	2.12869e-09	1.52696	188.361	267					2.06183e-08	1.48498	191.315	265	2.81784e-08	1.48459	186.767	259
GO:0005388	MF	calcium-transporting ATPase activity	77	1.07819e-08	4.53989	8.20654	27	6.86056e-09	4.64856	8.03532	27					1.19466e-08	4.32584	9.45845	29	5.46033e-09	4.49897	9.13867	29					1.16703e-08	4.25027	10.0765	30	7.43053e-09	4.34595	9.88369	30					5.01123e-10	4.75921	10.0345	32	2.6881e-10	4.89398	9.7941	32
GO:0009871	BP	jasmonic acid and ethylene-dependent systemic resistance. ethylene mediated signaling pathway	49	5.11909e-08	5.74653	5.26102	20	3.59008e-08	5.88437	5.15101	20					9.98138e-08	5.32758	6.0575	21	5.50909e-08	5.53948	5.85391	21					9.88457e-09	5.8417	6.45609	23	6.75718e-09	5.97563	6.33037	23					1.36209e-06	4.5741	6.42966	20	9.27188e-07	4.70259	6.27679	20
GO:0048518	BP	positive regulation of biological process	2141	5.40786e-08	1.42544	220.824	298	1.39089e-08	1.45137	215.915	296					5.62908e-08	1.39784	255.258	337	9.82557e-09	1.42997	246.523	332					6.08443e-09	1.41837	271.781	362	1.30949e-09	1.44308	266.33	360					9.67332e-07	1.3444	271.104	346	2.32596e-07	1.37046	264.366	343
GO:0080142	BP	regulation of salicylic acid biosynthetic process	15	2.12518e-11	54.1334	1.61052	13	1.62182e-11	55.4306	1.57684	13					4.00574e-09	28.3954	1.85434	12	2.69166e-09	29.5236	1.79201	12					8.39341e-09	26.3926	1.97635	12	6.68175e-09	26.9971	1.93787	12					8.00356e-09	26.5177	1.96826	12	6.05422e-09	27.262	1.92147	12
GO:0009694	BP	jasmonic acid metabolic process	154	4.54334e-10	3.41294	16.2188	44	2.72118e-09	3.27739	15.8711	42					1.05185e-10	3.39016	18.7026	49	1.24367e-09	3.21802	18.064	46					9.44895e-09	2.96232	19.9479	47	4.49133e-08	2.84847	19.5525	45					8.12001e-10	3.1676	19.8411	49	1.11244e-08	2.97329	19.3571	46
GO:0071241	BP	cellular response to inorganic substance	359	2.63276e-09	2.28349	38.545	77	2.41789e-09	2.29979	37.7391	76					2.43444e-08	2.10932	44.3804	82	5.2411e-09	2.19382	42.8889	82					9.04722e-08	2.02237	47.3007	84	3.80339e-08	2.06904	46.3796	84					3.62782e-08	2.06399	47.1071	85	1.21433e-08	2.12237	45.9871	85
GO:0010030	BP	positive regulation of seed germination	144	2.84472e-06	2.67753	15.461	35	1.76052e-06	2.74189	15.1377	35					6.20931e-08	2.92861	17.8016	42	7.174e-08	2.9436	17.2033	41					1.44953e-09	3.20443	18.973	47	7.56946e-10	3.27808	18.6035	47					3.88614e-08	2.92261	18.8953	44	1.8998e-08	3.00491	18.4461	44
GO:0009893	BP	positive regulation of metabolic process	4021	2.47125e-08	1.31023	432.37	540	7.94428e-09	1.3255	423.329	534					2.4055e-08	1.29148	497.827	612	6.33535e-08	1.2858	481.096	590					4.39703e-09	1.30019	529.489	653	3.09257e-09	1.30614	519.172	643					2.55936e-08	1.28361	527.379	644	1.65413e-08	1.29096	514.833	632
GO:0016629	MF	12-oxophytodienoate reductase activity	37	5.60328e-08	7.13976	3.9434	17	4.09916e-08	7.31043	3.86113	17					6.80912e-08	6.7775	4.54497	18	3.98397e-08	7.04842	4.39131	18					2.67475e-08	7.02343	4.84194	19	1.94435e-08	7.18135	4.7493	19					2.49691e-08	7.05728	4.82178	19	1.67235e-08	7.25685	4.70626	19
GO:0009288	CC	bacterial-type flagellum	132	1.65351e-05	2.59504	13.9938	31	2.97143e-05	2.54369	13.7121	30					2.669e-08	3.14352	16.0846	40	1.02352e-08	3.26855	15.5442	40					5.02491e-08	3.02766	17.1444	41	2.90838e-08	3.09617	16.8148	41					3.72778e-10	3.49158	17.085	45	1.69398e-10	3.58974	16.6787	45
GO:0001539	BP	cilium or flagellum-dependent cell motility	107	1.79673e-05	2.81255	11.4884	27	3.57165e-05	2.73874	11.2481	26					3.25428e-08	3.45625	13.2276	35	1.35993e-08	3.59395	12.783	35					4.75966e-08	3.35064	14.098	36	2.86249e-08	3.42756	13.8235	36					2.21227e-10	3.96598	14.0403	40	1.06298e-10	4.07761	13.7065	40
GO:0004970	MF	ionotropic glutamate receptor activity	60	4.66492e-07	4.52402	6.39471	21	3.27941e-07	4.63222	6.26128	21					5.49451e-08	4.77143	7.37022	24	2.82341e-08	4.96229	7.12104	24					3.91293e-08	4.75454	7.85179	25	2.65397e-08	4.86152	7.70157	25					1.70007e-07	4.45839	7.81909	24	1.07224e-07	4.58454	7.63177	24
GO:0022835	MF	transmitter-gated channel activity	60	4.66492e-07	4.52402	6.39471	21	3.27941e-07	4.63222	6.26128	21					5.49451e-08	4.77143	7.37022	24	2.82341e-08	4.96229	7.12104	24					3.91293e-08	4.75454	7.85179	25	2.65397e-08	4.86152	7.70157	25					1.70007e-07	4.45839	7.81909	24	1.07224e-07	4.58454	7.63177	24
GO:0071555	BP	cell wall organization	4177	7.87748e-09	1.31665	448.475	562	5.31586e-09	1.32382	439.098	553					4.22224e-09	1.30322	516.371	639	3.53346e-08	1.28669	499.016	612					3.39441e-09	1.29688	550.349	677	2.28407e-08	1.28125	539.632	658					1.01277e-09	1.30846	548.096	679	6.25535e-09	1.29479	535.065	658
GO:0008810	MF	cellulase activity	157	3.63821e-07	2.78016	16.7328	39	6.07001e-07	2.75008	16.3837	38					3.15691e-08	2.87924	19.2854	45	9.80455e-08	2.8106	18.6334	43					8.6472e-09	2.93518	20.5455	48	4.6219e-09	3.00138	20.1525	48					7.55709e-09	2.94937	20.46	48	1.04594e-08	2.94246	19.9698	47
GO:0016835	MF	carbon-oxygen lyase activity	510	0.000183299	1.58935	54.355	81	0.000153686	1.6036	53.2209	80					4.61864e-07	1.79494	62.6469	102	3.15283e-07	1.82135	60.5288	100					0.000204609	1.62222	50.79	76	0.000188463	1.63181	49.8144	75					5.71531e-10	2	66.4623	117	1.13285e-09	1.98843	64.87	114
GO:0005272	MF	sodium channel activity	53	2.11985e-07	5.09177	5.64866	20	1.50076e-07	5.21353	5.5308	20					8.87719e-08	5.07847	6.51036	22	4.77676e-08	5.28156	6.29025	22					5.44769e-08	5.10249	6.93575	23	3.78778e-08	5.21727	6.80306	23					2.54297e-07	4.74536	6.90687	22	1.65481e-07	4.8796	6.7414	22
GO:0071311	BP	cellular response to acetate	53	2.39151e-07	5.04965	5.69049	20	1.69289e-07	5.17077	5.57151	20					9.95315e-08	5.0415	6.55199	22	5.38122e-08	5.24204	6.33178	22					6.1903e-08	5.06247	6.98312	23	4.27867e-08	5.17853	6.84713	23					2.8714e-07	4.70779	6.95453	22	1.87628e-07	4.84006	6.78919	22
GO:0071260	BP	cellular response to mechanical stimulus	53	2.39151e-07	5.04965	5.69049	20	1.69289e-07	5.17077	5.57151	20					9.95315e-08	5.0415	6.55199	22	5.38122e-08	5.24204	6.33178	22					6.1903e-08	5.06247	6.98312	23	4.27867e-08	5.17853	6.84713	23					2.8714e-07	4.70779	6.95453	22	1.87628e-07	4.84006	6.78919	22
GO:0046658	CC	anchored component of plasma membrane	517	4.01804e-08	1.9352	54.809	96	1.50736e-08	1.98025	53.7056	96					7.1833e-09	1.93747	62.9981	109	1.225e-07	1.8521	60.8814	102					5.79151e-08	1.84203	67.1489	111	2.07729e-08	1.88403	65.8579	111					8.99398e-10	1.98024	66.9162	117	3.52147e-09	1.94623	65.3249	113
GO:0005230	MF	extracellular ligand-gated ion channel activity	62	8.70607e-07	4.30319	6.60787	21	6.14851e-07	4.40611	6.46999	21					1.15343e-07	4.52015	7.61589	24	5.97955e-08	4.70096	7.35841	24					8.51693e-08	4.49739	8.11351	25	5.80783e-08	4.59858	7.95829	25					3.51233e-07	4.2236	8.07973	24	2.23007e-07	4.3431	7.88616	24
GO:0035235	BP	ionotropic glutamate receptor signaling pathway	58	2.73382e-07	4.72927	6.22733	21	1.91291e-07	4.84272	6.09712	21					1.40608e-07	4.66853	7.1701	23	7.47976e-08	4.85427	6.92912	23					9.72935e-08	4.6613	7.6419	24	6.66822e-08	4.76818	7.49309	24					4.16569e-07	4.35948	7.61062	23	2.6937e-07	4.48198	7.42968	23
GO:0015086	MF	cadmium ion transmembrane transporter activity	80	4.73392e-07	3.82009	8.52628	25	3.17727e-07	3.9115	8.34838	25					1.31529e-07	3.85467	9.82696	28	6.33125e-08	4.00893	9.49472	28					4.92961e-07	3.58437	10.4691	28	3.30518e-07	3.66505	10.2688	28					2.97647e-08	4.01433	10.4255	30	1.70391e-08	4.12799	10.1757	30
GO:0004640	MF	phosphoribosylanthranilate isomerase activity	12	1.01266e-08	41.9704	1.27894	10	8.23706e-09	42.9727	1.25226	10					4.05601e-08	35.746	1.47404	10	2.89953e-08	37.1736	1.42421	10					7.51571e-08	33.2441	1.57036	10	6.22693e-08	33.9909	1.54031	10					7.21651e-08	33.4042	1.56382	10	5.69834e-08	34.348	1.52635	10
GO:0010951	BP	negative regulation of endopeptidase activity	117	4.82785e-11	4.1737	12.562	39	2.55291e-11	4.27405	12.2994	39					3.00022e-09	3.55633	14.4638	39	1.12484e-09	3.69808	13.9777	39					5.22918e-09	3.43401	15.4156	40	2.95862e-09	3.51288	15.1154	40					1.60537e-08	3.32052	15.3525	39	9.24576e-08	3.1571	14.9874	37
GO:0004834	MF	tryptophan synthase activity	26	6.12842e-07	8.39604	2.77104	13	4.79761e-07	8.59664	2.71322	13					4.37725e-08	9.75329	3.19376	15	2.74035e-08	10.143	3.08578	15					1.03114e-07	9.07031	3.40244	15	7.94442e-08	9.27417	3.33735	15					9.86733e-09	10.6952	3.38827	16	7.02396e-08	9.37164	3.3071	15
GO:0035885	MF	exochitinase activity	8	1.65903e-08		0.852628	8	1.40139e-08		0.834838	8					5.16838e-08		0.982696	8	3.92471e-08		0.949472	8					8.57727e-08		1.04691	8	7.34868e-08		1.02688	8					8.29557e-08		1.04255	8	6.83223e-08		1.01757	8
GO:0030145	MF	manganese ion binding	406	2.12407e-07	2.00428	43.2709	78	1.52151e-06	1.92265	42.368	74					7.39868e-08	1.9865	49.8718	88	1.33593e-07	1.97662	48.1857	85					4.67106e-09	2.06829	53.1304	96	1.61767e-08	2.02863	52.114	93					8.25928e-10	2.13597	52.9092	98	4.95597e-09	2.0791	51.6416	94
GO:0048046	CC	apoplast	2151	1.88068e-10	1.50122	228.035	321	1.87422e-09	1.47309	223.444	310					8.55865e-12	1.50975	262.106	368	2.96323e-07	1.37285	253.299	330	4.98618e-14	4.9001	8.80661	38	6.26158e-10	1.44234	279.376	377	1.18662e-07	1.37376	274.004	356	1.18243e-07	4.34691	5.37141	21	1.80513e-11	1.48738	278.408	385	3.70618e-08	1.392	271.787	357	1.6123e-10	4.76972
GO:0009705	CC	plant-type vacuole membrane	918	7.53931e-10	1.76978	97.3204	158	1.75134e-08	1.69954	95.3612	150	0.000847311	4.28941	1.9592	8	1.22211e-09	1.71223	111.861	175	2.24159e-08	1.65498	108.103	165					5.682e-09	1.65861	119.232	181	4.90857e-08	1.61425	116.939	174					9.64803e-11	1.74797	118.818	188	1.01656e-08	1.65326	115.993	176	3.23701e-05	4.48742
GO:0015431	MF	glutathione S-conjugate-exporting ATPase activity	52	1.60786e-05	4.07886	5.54208	17	1.21707e-05	4.17636	5.42645	17					1.05417e-08	5.67634	6.38752	23	5.43415e-09	5.90337	6.17157	23					3.52059e-08	5.27853	6.80488	23	2.4413e-08	5.39726	6.6747	23					3.25338e-08	5.30398	6.77655	23	2.05315e-08	5.45404	6.6142	23
GO:0010290	MF	chlorophyll catabolite transmembrane transporter activity	52	1.60786e-05	4.07886	5.54208	17	1.21707e-05	4.17636	5.42645	17					1.05417e-08	5.67634	6.38752	23	5.43415e-09	5.90337	6.17157	23					3.52059e-08	5.27853	6.80488	23	2.4413e-08	5.39726	6.6747	23					3.25338e-08	5.30398	6.77655	23	2.05315e-08	5.45404	6.6142	23
GO:0016701	MF	oxidoreductase activity. acting on single donors with incorporation of molecular oxygen	229
GO:0008324	MF	cation transmembrane transporter activity	2403	3.45028e-08	1.40036	256.108	340	1.84907e-07	1.37908	250.764	329									7.19833e-08	1.3739	281.148	366					1.44752e-07	1.34858	310.004	396	1.32526e-06	1.31956	304.065	382									1.19236e-08	1.38395	305.652	399
GO:0042973	MF	glucan endo-1.3-beta-D-glucosidase activity	140	3.856e-09	3.36618	14.921	40	7.27471e-09	3.32692	14.6097	39					2.12227e-08	3.0708	17.1972	42	7.75401e-08	2.98012	16.6158	40					1.2806e-07	2.85516	18.3208	42	7.44807e-08	2.91951	17.9703	42					3.81859e-08	2.96793	18.2446	43	5.75724e-08	2.95029	17.8075	42
GO:0080031	MF	methyl salicylate esterase activity	41	2.04206e-06	5.37464	4.36972	16	1.5429e-06	5.50309	4.27854	16					4.7726e-07	5.59843	5.03632	18	2.8415e-07	5.82222	4.86604	18					2.18896e-07	5.74605	5.36539	19	1.60826e-07	5.87525	5.26274	19					2.04817e-07	5.77375	5.34305	19	1.39013e-07	5.93702	5.21504	19
GO:0042981	BP	regulation of apoptotic process	110	3.06037e-05	2.71075	11.8105	27	2.10344e-05	2.77584	11.5635	27					2.32298e-06	2.9156	13.5985	32	1.10307e-06	3.03172	13.1414	32					1.05591e-07	3.21464	14.4933	36	6.40362e-08	3.28844	14.211	36					9.51672e-08	3.22991	14.4339	36	5.15148e-08	3.32079	14.0908	36
GO:0010181	MF	FMN binding	182	1.11103e-06	2.52367	19.3973	42	1.66835e-06	2.50438	18.9926	41					1.87924e-07	2.56694	22.3563	48	1.78025e-07	2.59456	21.6005	47					1.90795e-07	2.52432	23.8171	50	1.04536e-07	2.58127	23.3614	50					1.67655e-07	2.53653	23.7179	50	7.85057e-08	2.60851	23.1497	50
GO:0005234	MF	extracellularly glutamate-gated ion channel activity	61	6.39965e-07	4.41084	6.50129	21	4.50927e-07	4.51634	6.36564	21					3.68099e-07	4.33129	7.49306	23	1.97427e-07	4.50453	7.23972	23					2.65659e-07	4.317	7.98265	24	1.84649e-07	4.41412	7.82993	24					1.05736e-06	4.04716	7.94941	23	6.87602e-07	4.16166	7.75896	23
GO:0050789	BP	regulation of biological process	1116	3.21465e-11	2.07714	62.6009	117	5.19388e-11	2.07763	60.8397	114					4.15255e-10	1.92992	73.0053	127	6.58333e-07	1.55739	111.105	162					1.56971e-07	1.56467	123.682	180	6.66609e-07	1.5367	120.452	173					1.03097e-07	1.57426	123.762	181	1.93271e-06	1.51106	119.975	170
GO:0060560	BP	developmental growth involved in morphogenesis	4265	2.21127e-07	1.27772	457.924	560	1.16729e-07	1.28757	448.349	552					7.26719e-09	1.29493	527.249	649	8.75112e-08	1.27445	509.529	620					1.43958e-09	1.30159	561.943	693	5.44596e-08	1.26986	551	667					2.80179e-09	1.2961	559.643	688	2.53467e-08	1.27839	546.337	665
GO:0051674	BP	localization of cell	116	8.22415e-05	2.52776	12.4547	27	0.000150675	2.4645	12.1942	26					3.05307e-07	3.07176	14.3402	35	1.32811e-07	3.19414	13.8582	35					4.63275e-07	2.97324	15.2838	36	2.85677e-07	3.0415	14.9862	36					3.50007e-09	3.49579	15.2212	40	1.73428e-09	3.59419	14.8594	40
GO:1901606	BP	alpha-amino acid catabolic process	485	6.69161e-07	1.86072	51.2437	87	2.72037e-07	1.90622	50.1596	87					8.74002e-08	1.88443	59.0461	100	1.63501e-08	1.95959	57.0706	100					5.28584e-07	1.7941	62.9688	102	3.91699e-07	1.81207	61.7563	101					4.50882e-07	1.80121	62.7548	102	1.45319e-07	1.85162	61.2785	102
GO:0010230	BP	alternative respiration	13	4.25813e-08	27.7489	1.39578	10	3.46998e-08	28.4136	1.3666	10					1.66087e-07	23.6572	1.60709	10	1.19483e-07	24.597	1.55308	10					3.06456e-07	21.989	1.71284	10	2.53722e-07	22.4925	1.67949	10					2.94623e-07	22.0932	1.70583	10	2.33825e-07	22.7132	1.66527	10
GO:0010359	BP	regulation of anion channel activity	276	6.68057e-07	2.20611	29.2388	57	3.32223e-07	2.26034	28.6147	57					2.97672e-07	2.17687	33.7371	64	8.45951e-08	2.26544	32.5822	64					1.0412e-08	2.32203	35.966	71	4.51922e-09	2.37646	35.2528	71					2.39007e-07	2.15885	35.812	67	9.60394e-08	2.22057	34.9488	67
GO:0080030	MF	methyl indole-3-acetate esterase activity	43	4.2647e-06	4.97635	4.58288	16	3.23685e-06	5.09529	4.48725	16					1.12503e-06	5.15038	5.28199	18	6.7566e-07	5.35626	5.10341	18					5.5084e-07	5.26703	5.62712	19	4.06863e-07	5.38546	5.51946	19					5.16007e-07	5.29242	5.60368	19	3.52547e-07	5.44209	5.46943	19
GO:0048366	BP	leaf development	2518	5.81571e-09	1.41808	264.697	355	4.89787e-09	1.42462	259.023	349					6.60982e-07	1.32779	305.273	386	2.99172e-07	1.34446	294.784	377					5.1607e-07	1.32224	325.319	409	8.85533e-07	1.31739	318.861	400					2.51934e-06	1.29997	324.087	402	1.18979e-06	1.31429	316.173	396
GO:0071230	BP	cellular response to amino acid stimulus	59	1.74416e-06	4.27236	6.3347	20	1.25194e-06	4.37484	6.20224	20					9.15353e-07	4.22353	7.29372	22	5.08096e-07	4.39155	7.04859	22					6.4347e-07	4.2183	7.77366	23	4.52143e-07	4.31501	7.62228	23					2.51605e-06	3.94397	7.74184	22	1.67712e-06	4.05478	7.55777	22
GO:0022804	MF	active transmembrane transporter activity	1389	3.68597e-05	1.38438	146.79	194	2.17951e-05	1.40122	143.695	192
GO:0008398	MF	sterol 14-demethylase activity	19	5.21342e-08	14.3926	2.02499	12	4.1118e-08	14.7365	1.98274	12					2.55141e-07	12.2577	2.3339	12	1.73966e-07	12.7473	2.255	12					5.14611e-07	11.3996	2.4864	12	4.15607e-07	11.6557	2.43883	12					4.91416e-07	11.4545	2.47605	12	3.75735e-07	11.7782	2.41673	12
GO:0015398	MF	high-affinity secondary active ammonium transmembrane transporter activity	19	5.21342e-08	14.3926	2.02499	12	4.1118e-08	14.7365	1.98274	12					1.11756e-09	20.0264	2.3339	14	1.73966e-07	12.7473	2.255	12					5.14611e-07	11.3996	2.4864	12	4.15607e-07	11.6557	2.43883	12					4.91416e-07	11.4545	2.47605	12	3.75735e-07	11.7782	2.41673	12
GO:0045229	BP	external encapsulating structure organization	4463	7.54589e-08	2.30782	30.2032	61	8.33947e-08	2.31506	29.5594	60					9.025e-08	2.21794	34.8116	67	2.97861e-07	2.17065	33.6661	64					9.36517e-08	2.18272	37.1202	70	4.81223e-07	2.10535	36.4232	67					3.7649e-07	2.11172	36.947	68	3.44582e-07	2.12778	36.0902	67
GO:0006790	BP	sulfur compound metabolic process	4117	7.25808e-08	1.30768	406.162	507	8.39953e-08	1.309	397.583	497									5.35655e-08	1.29756	448.794	555					1.01697e-07	1.27846	494.073	602	1.65449e-06	1.24957	484.394	580	0.000149826	2.48153	10.5632	24	4.77684e-06	1.23987	473.111	563	7.2914e-05	1.20626	461.831	538	3.68472e-05	2.46539
GO:0006164	BP	purine nucleotide biosynthetic process	2293	8.52146e-07	1.35907	246.194	319	6.63029e-07	1.36664	241.046	314					9.96308e-06	1.29799	283.466	352	2.08954e-06	1.32816	273.939	347					1.08208e-07	1.35751	302.119	388	4.76737e-08	1.37198	296.235	384					7.79038e-06	1.2943	300.882	372	4.7037e-06	1.30551	293.728	366
GO:0080032	MF	methyl jasmonate esterase activity	44	6.03864e-06	4.79854	4.68945	16	4.59361e-06	4.91323	4.59161	16					1.68502e-06	4.95221	5.40483	18	1.01637e-06	5.15016	5.2221	18					8.50325e-07	5.05627	5.75798	19	6.29734e-07	5.16996	5.64782	19					7.97013e-07	5.08064	5.734	19	5.46336e-07	5.22432	5.59663	19
GO:0015294	MF	solute:cation symporter activity	759													3.58295e-06	2.05964	32.4562	59	4.77787e-08	1.70658	90.0812	141					6.64487e-07	1.60529	99.3251	147	5.87815e-07	1.61386	97.4249	145					4.00146e-08	1.68286	98.9116	152	2.09369e-07	1.64522	96.5419	146
GO:0009712	BP	catechol-containing compound metabolic process	121	0.000174614	2.39311	12.9915	27									8.77476e-09	3.38263	14.9583	39	1.31093e-07	3.13097	14.4556	36					1.42923e-06	2.79811	15.9426	36	8.93612e-07	2.86235	15.6321	36					4.40342e-07	2.92427	15.8773	37	7.28275e-07	2.89051	15.4998	36
GO:0044249	BP	cellular biosynthetic process	27032	5.38821e-06	1.11896	2851.16	3024									6.00532e-08	1.13527	3290.79	3512	7.43804e-08	1.13635	3178.68	3395					3.89099e-07	1.12229	3502.97	3715	1.63661e-07	1.12775	3434.66	3652					1.14114e-05	1.10423	3490.51	3672	4.82791e-06	1.11029	3407.33	3595
GO:2001080	MF	chitosan binding	7	9.30548e-06	50.3374	0.74605	6	8.21647e-06	51.539	0.730483	6					4.21061e-07		0.859859	7	3.30939e-07		0.830788	7					6.55887e-07		0.916042	7	5.72909e-07		0.898517	7					6.37001e-07		0.912228	7	5.37521e-07		0.890373	7
GO:0044459	CC	plasma membrane part	2160	1.31082e-10	1.50507	228.989	323	1.6992e-10	1.50621	224.379	317					5.81898e-07	1.35597	263.203	339	1.54697e-06	1.34561	254.359	326					4.69082e-07	1.34942	280.545	359	2.49717e-07	1.36192	275.151	355					2.98374e-09	1.42157	279.573	373	7.24658e-09	1.41397	272.924	363
GO:0032491	BP	detection of molecule of fungal origin	7	9.71977e-06	49.9225	0.751574	6	8.58011e-06	51.1178	0.735859	6					4.40288e-07		0.865357	7	3.46554e-07		0.836273	7					6.87921e-07		0.922299	7	5.99424e-07		0.904338	7					6.68441e-07		0.918523	7	5.64791e-07		0.896685	7
GO:0032499	BP	detection of peptidoglycan	7	9.71977e-06	49.9225	0.751574	6	8.58011e-06	51.1178	0.735859	6					4.40288e-07		0.865357	7	3.46554e-07		0.836273	7					6.87921e-07		0.922299	7	5.99424e-07		0.904338	7					6.68441e-07		0.918523	7	5.64791e-07		0.896685	7
GO:0002429	BP	immune response-activating cell surface receptor signaling pathway	7	9.71977e-06	49.9225	0.751574	6	8.58011e-06	51.1178	0.735859	6					4.40288e-07		0.865357	7	3.46554e-07		0.836273	7					6.87921e-07		0.922299	7	5.99424e-07		0.904338	7					6.68441e-07		0.918523	7	5.64791e-07		0.896685	7
GO:0002752	BP	cell surface pattern recognition receptor signaling pathway	7	9.71977e-06	49.9225	0.751574	6	8.58011e-06	51.1178	0.735859	6					4.40288e-07		0.865357	7	3.46554e-07		0.836273	7					6.87921e-07		0.922299	7	5.99424e-07		0.904338	7					6.68441e-07		0.918523	7	5.64791e-07		0.896685	7
GO:0031640	BP	killing of cells of other organism	61	1.55001e-07	4.70088	6.54943	22	5.09517e-07	4.47929	6.41249	21					9.04084e-08	4.60858	7.54096	24	4.09529e-06	3.87687	7.28752	21					6.64751e-08	4.58612	8.03717	25	9.06817e-07	4.08777	7.88066	23					1.19401e-06	4.01511	8.00427	23	1.22826e-05	3.57959	7.81397	21
GO:0046189	BP	phenol-containing compound biosynthetic process	129	0.000190567	2.36558	13.0093	27									1.2198e-08	3.29988	15.0201	39	1.6198e-07	3.07114	14.4812	36					1.93495e-06	2.73209	16.0477	36	1.17418e-06	2.79911	15.7116	36					6.05801e-07	2.85346	15.9763	37	9.58648e-07	2.8265	15.5784	36
GO:0048438	BP	floral whorl development	3191	9.5894e-08	1.33182	342.611	435	1.30085e-07	1.3311	335.447	426					1.0625e-07	1.31028	394.479	492	3.58735e-07	1.29996	381.221	473					2.07012e-06	1.26558	420.436	509	4.40928e-06	1.25798	412.249	497					2.79525e-07	1.29085	418.715	515	6.33595e-07	1.28387	408.76	501
GO:0008281	MF	sulfonylurea receptor activity	45	0.000161773	3.79116	4.79603	14	0.000129118	3.88175	4.69596	14					8.64045e-08	5.72402	5.52766	20	4.84779e-08	5.95288	5.34078	20					2.47406e-07	5.32299	5.88884	20	1.79758e-07	5.44269	5.77618	20					2.3094e-07	5.34865	5.86432	20	1.54555e-07	5.49992	5.72383	20
GO:0051238	BP	sequestering of metal ion	138	9.9035e-07	2.83379	14.8168	35	6.04316e-07	2.90189	14.5069	35					1.25358e-06	2.7015	17.0599	38	5.36391e-07	2.80917	16.4865	38					2.2121e-06	2.60287	18.1825	39	1.35677e-06	2.66265	17.8284	39					2.92597e-08	3.00643	18.108	43	1.3435e-07	2.88579	17.6775	41
GO:1901564	BP	organonitrogen compound metabolic process	27966					0.000491178	1.09103	2605.69	2731					1.14328e-05	1.10853	3168.4	3343	7.15367e-07	1.12748	2969.94	3164					2.62935e-07	1.12707	3280.27	3491	1.92505e-08	1.1412	3216.95	3446					0.000329895	1.08496	3270.1	3413	4.74686e-05	1.0989	3193.89	3356
GO:0004714	MF	transmembrane receptor protein tyrosine kinase activity	226	7.04909e-08	2.51608	24.0867	52	3.56608e-08	2.57651	23.5842	52					4.48538e-07	2.30538	27.7612	55	1.46955e-07	2.39793	26.8226	55					1.45071e-06	2.19534	29.5751	56	7.86552e-07	2.24491	29.0093	56					2.38311e-07	2.31256	29.4519	58	1.04187e-07	2.37824	28.7463	58
GO:0015671	BP	oxygen transport	17	1.44625e-07	15.2632	1.82525	11	1.16182e-07	15.6289	1.78709	11					7.03128e-06	10.1381	2.10158	10	5.144e-06	10.5409	2.03095	10					8.81712e-08	15.8351	2.23987	12	9.69516e-07	12.3716	2.19625	11					1.13627e-06	12.152	2.2307	11	8.88944e-07	12.493	2.17766	11
GO:0010055	BP	atrichoblast differentiation	214	3.56178e-08	2.61241	22.9767	51	1.79567e-08	2.67533	22.4963	51					4.88214e-07	2.34208	26.4552	53	1.65631e-07	2.43559	25.5661	53					1.50042e-06	2.23139	28.196	54	8.16187e-07	2.28272	27.6469	54					2.39222e-07	2.35509	28.0806	56	1.07161e-07	2.4215	27.4129	56
GO:0002764	BP	immune response-regulating signaling pathway	27	4.57136e-05	5.84715	2.84386	11	3.7335e-05	5.99057	2.78288	11					6.36542e-07	7.80212	3.27903	14	4.13027e-07	8.118	3.16657	14					1.39047e-06	7.25487	3.49404	14	1.08613e-06	7.42471	3.42435	14					1.33926e-06	7.28048	3.48335	14	9.9139e-07	7.4882	3.39901	14
GO:0006694	BP	steroid biosynthetic process	1161	8.90394e-06	1.47756	115.236	161	9.71201e-06	1.47978	112.835	158					3.75792e-08	1.55168	143.526	207	1.66951e-07	1.52819	138.702	198					1.60189e-06	1.45727	152.97	209	4.35506e-06	1.43834	149.991	203					6.63017e-08	1.52598	152.344	216	2.20325e-07	1.50633	148.722	209
GO:0016491	MF	oxidoreductase activity	2014	2.14411e-08	1.44926	211.762	290	2.09799e-08	1.45397	207.376	285					1.89888e-05	1.32721	219.202	278	1.11015e-05	1.34255	212.209	272					5.77474e-06	1.32051	262.14	330	5.28155e-06	1.32466	257.338	325					2.5284e-06	1.33481	261.416	332	1.68925e-09	1.43766	267.67	361
GO:0015399	MF	primary active transmembrane transporter activity	1001	3.62978e-07	1.58389	106.685	158	2.65006e-07	1.59766	104.459	156					1.60981e-07	1.56718	122.96	179	6.52738e-08	1.5972	118.803	176					4.89674e-08	1.57853	130.994	191	3.12189e-08	1.59344	128.488	189					1.45672e-07	1.55499	130.449	188	1.07566e-07	1.56786	127.323	185
GO:0004965	MF	G protein-coupled GABA receptor activity	50	3.82344e-05	3.95135	5.32893	16	2.94798e-05	4.04579	5.21774	16					1.42197e-05	4.02326	6.14185	18	8.80187e-06	4.18409	5.9342	18					1.9066e-06	4.43545	6.54316	20	1.40379e-06	4.53519	6.41798	20					3.20166e-05	3.75947	6.51591	18	2.29975e-05	3.86578	6.35981	18
GO:0006888	BP	ER to Golgi vesicle-mediated transport	572	2.26446e-07	1.81556	61.4144	102	8.23202e-08	1.85959	60.1302	102					9.60442e-07	1.71631	70.712	111	5.77128e-07	1.74507	68.3355	109					2.55434e-07	1.74083	75.365	119	9.01127e-08	1.78116	73.8974	119					8.94707e-06	1.61976	75.0564	112	2.98929e-06	1.66573	73.272	112
GO:0010037	BP	response to carbon dioxide	63	5.50473e-06	3.87468	6.76417	20	3.98787e-06	3.96762	6.62273	20					8.06168e-07	4.08463	7.78821	23	4.38376e-07	4.24713	7.52646	23					2.46303e-06	3.79621	8.30069	23	1.74969e-06	3.88325	8.13905	23					2.82443e-08	4.66313	8.26671	26	1.71196e-08	4.7942	8.07016	26
GO:0051273	BP	beta-glucan metabolic process	1282	1.44745e-06	1.47688	137.645	192	3.59082e-07	1.51315	134.767	192					0.000131819	1.34192	158.484	203	2.5936e-05	1.38812	153.157	202					8.41506e-06	1.39745	168.912	223	2.20576e-06	1.43021	165.623	223					2.52341e-05	1.37313	168.221	219	7.60602e-06	1.40461	164.221	218
GO:0042284	MF	sphingolipid delta-4 desaturase activity	12	2.87368e-07	25.1783	1.27894	9	2.39249e-07	25.7796	1.25226	9					9.82778e-07	21.4447	1.47404	9	7.30139e-07	22.301	1.42421	9					1.69579e-06	19.9439	1.57036	9	1.43598e-06	20.3919	1.54031	9					1.63597e-06	20.0399	1.56382	9	1.32764e-06	20.6061	1.52635	9
GO:0009674	MF	potassium:sodium symporter activity	35	1.02941e-06	6.29805	3.73025	15	7.85215e-07	6.44856	3.65242	15					1.05909e-06	6.023	4.29929	16	6.63362e-07	6.2637	4.15394	16					2.48368e-06	5.60119	4.58021	16	1.91716e-06	5.72709	4.49259	16					5.65834e-08	7.07845	4.56114	18	3.86923e-08	7.2786	4.45187	18
GO:0030170	MF	pyridoxal phosphate binding	410	2.45881e-06	1.88592	43.6972	75	2.20884e-06	1.89963	42.7854	74					8.7669e-07	1.87654	50.3632	85	2.07901e-07	1.95216	48.6604	85					3.24306e-06	1.79671	53.6539	87	1.48333e-06	1.83741	52.6274	87					2.74345e-06	1.80543	53.4305	87	1.91606e-06	1.82962	52.1504	86
GO:0051213	MF	dioxygenase activity	561
GO:0007585	BP	respiratory gaseous exchange	15	3.64427e-07	16.6488	1.61052	10	2.9831e-07	17.0476	1.57684	10					1.37561e-06	14.1939	1.85434	10	9.97987e-07	14.7577	1.79201	10					2.49648e-06	13.193	1.97635	10	2.07776e-06	13.495	1.93787	10					2.40274e-06	13.2555	1.96826	10	1.9191e-06	13.6274	1.92147	10
GO:0008517	MF	folic acid transmembrane transporter activity	65	0.000354382	2.97353	6.9276	17	0.000276149	3.04461	6.78306	17					3.25938e-07	4.1892	7.9844	24	1.71217e-07	4.35677	7.71446	24					1.04567e-06	3.89557	8.5061	24	7.34618e-07	3.98321	8.34337	24					9.69087e-07	3.91436	8.47069	24	6.21475e-07	4.02511	8.26775	24
GO:0046467	BP	membrane lipid biosynthetic process	586	3.54214e-09	1.80299	83.1027	137	3.18431e-09	1.81369	81.365	135					2.86417e-06	1.66895	72.3077	111	1.72587e-06	1.6972	69.8749	109					4.89851e-07	1.70992	77.0705	120	5.43616e-07	1.71253	75.5715	118					3.89159e-07	1.71883	76.7279	120	6.11446e-07	1.71129	74.9204	117
GO:0042398	BP	cellular modified amino acid biosynthetic process	391	0.000258016	1.66351	41.9808	65	0.000424913	1.64066	41.103	63					1.07668e-06	1.88987	48.3363	82	7.15706e-06	1.81507	46.7118	77					5.52566e-07	1.89449	51.517	87	3.22004e-06	1.82414	50.5138	83					2.37582e-07	1.93202	51.3061	88	1.6427e-07	1.9574	50.0863	87
GO:1901701	BP	cellular response to oxygen-containing compound	4732	4.44048e-89	2.3528	457.279	889	7.13977e-92	2.39701	446.719	882					1.2522e-07	1.40771	226.448	302	1.02667e-06	1.37943	217.741	286					6.03313e-08	1.40679	242.246	322	3.19457e-07	1.38454	236.804	311					9.5122e-06	1.3237	241.091	305	1.15031e-05	1.32429	234.462	297
GO:0006883	BP	cellular sodium ion homeostasis	65	9.35458e-06	3.70235	6.97891	20	6.80812e-06	3.79116	6.83298	20					5.89497e-06	3.63384	8.03545	22	3.35899e-06	3.7784	7.76539	22					4.56131e-06	3.61532	8.5642	23	3.25796e-06	3.69821	8.39743	23					1.54436e-05	3.3933	8.52914	22	1.04997e-05	3.48864	8.32636	22
GO:0102360	MF	daphnetin 3-O-glucosyltransferase activity	44	0.000483069	3.51988	4.68945	13									8.21209e-06	4.50324	5.40483	17	5.14627e-06	4.68323	5.2221	17					1.56782e-07	5.54487	5.75798	20	1.13611e-07	5.66956	5.64782	20					1.81388e-05	4.20801	5.734	17	1.31279e-05	4.32699	5.59663	17
GO:0102425	MF	myricetin 3-O-glucosyltransferase activity	44	0.000483069	3.51988	4.68945	13									8.21209e-06	4.50324	5.40483	17	5.14627e-06	4.68323	5.2221	17					1.56782e-07	5.54487	5.75798	20	1.13611e-07	5.66956	5.64782	20					1.81388e-05	4.20801	5.734	17	1.31279e-05	4.32699	5.59663	17
GO:0010244	BP	response to low fluence blue light stimulus by blue low-fluence system	48													8.037e-06	4.26041	5.93387	18	4.95147e-06	4.42982	5.73445	18					9.82279e-07	4.71517	6.32433	20	7.1579e-07	4.82325	6.20118	20					4.29618e-06	4.34491	6.29844	19	2.99463e-06	4.46695	6.1487	19
GO:0001558	BP	regulation of cell growth	1454	5.99739e-07	1.46416	156.113	216	1.28781e-07	1.50024	152.848	216					2.6747e-06	1.40593	179.747	239	3.02568e-07	1.45581	173.706	238					2.17315e-05	1.35152	191.575	246	5.5696e-06	1.38328	187.844	246					1.19256e-05	1.36492	190.79	247	3.01859e-06	1.39722	186.254	246
GO:0040011	BP	locomotion	339	0.000252127	1.7217	36.3977	58	0.000797731	1.65357	35.6366	55					7.32404e-07	1.98824	41.908	74	1.70051e-06	1.96095	40.4995	71					2.04329e-06	1.91193	44.6656	76	7.16924e-06	1.85689	43.7958	73					1.75145e-06	1.92105	44.4828	76	6.98947e-07	1.97534	43.4252	76
GO:0043405	BP	regulation of MAP kinase activity	200	8.11595e-05	2.08433	21.4736	40	0.000110917	2.06786	21.0245	39					1.796e-06	2.30801	24.7245	49	3.82377e-06	2.27142	23.8935	47					4.74809e-06	2.20323	26.3514	50	6.19384e-06	2.1939	25.8382	49					2.0738e-05	2.09667	26.2435	48	5.12558e-05	2.03856	25.6196	46
GO:0030288	CC	outer membrane-bounded periplasmic space	72													8.60291e-06	3.38924	8.77343	23	4.84954e-06	3.52377	8.47864	23					7.28492e-06	3.35597	9.35149	24	5.19954e-06	3.43177	9.17169	24					2.31883e-05	3.16272	9.31909	23	1.56638e-05	3.25143	9.09748	23
GO:0010059	BP	positive regulation of atrichoblast fate specification	208	2.48351e-07	2.50394	22.3325	48	1.32343e-07	2.56422	21.8655	48					2.55591e-06	2.25078	25.7135	50	9.46295e-07	2.34061	24.8493	50					6.93649e-06	2.14709	27.4054	51	3.96457e-06	2.19646	26.8718	51					1.19851e-06	2.27142	27.2933	53	5.70548e-07	2.33545	26.6444	53
GO:0008106	MF	alcohol dehydrogenase (NADP+) activity	77	0.000368525	2.75067	8.20654	19	0.000806553	2.62257	8.03532	18					8.09132e-07	3.6487	9.45845	26	1.57428e-06	3.57806	9.13867	25					9.18526e-06	3.19925	10.0765	25	6.51951e-06	3.27123	9.88369	25					8.53189e-06	3.21468	10.0345	25	5.54095e-06	3.30565	9.7941	25
GO:0005358	MF	high-affinity glucose:proton symporter activity	6	1.4629e-06		0.639471	6	1.28899e-06		0.626128	6					3.42997e-06		0.737022	6	2.79023e-06		0.712104	6					5.01495e-06		0.785179	6	4.46599e-06		0.770157	6					4.89093e-06		0.781909	6	4.22849e-06		0.763177	6
GO:0016231	MF	beta-N-acetylglucosaminidase activity	6	1.4629e-06		0.639471	6	1.28899e-06		0.626128	6					3.42997e-06		0.737022	6	2.79023e-06		0.712104	6					5.01495e-06		0.785179	6	4.46599e-06		0.770157	6					4.89093e-06		0.781909	6	4.22849e-06		0.763177	6
GO:0009679	MF	hexose:proton symporter activity	6	1.4629e-06		0.639471	6	1.28899e-06		0.626128	6					3.42997e-06		0.737022	6	2.79023e-06		0.712104	6					5.01495e-06		0.785179	6	4.46599e-06		0.770157	6					4.89093e-06		0.781909	6	4.22849e-06		0.763177	6
GO:0009889	BP	regulation of biosynthetic process	12370	0.000108025	1.12394	1328.14	1445	3.93842e-05	1.13388	1300.37	1424					5.39425e-06	1.13936	1529.21	1677	5.0256e-06	1.14201	1477.81	1624					2.70558e-05	1.12388	1629.83	1769	5.14044e-06	1.13702	1598.1	1749					7.14027e-05	1.11666	1623.16	1754	2.4217e-05	1.12626	1584.57	1723
GO:0008667	MF	2.3-dihydro-2.3-dihydroxybenzoate dehydrogenase activity	117	0.000531896	2.28235	12.4697	25	0.000927518	2.21902	12.2095	24					1.02976e-07	3.18314	14.3719	36	1.40108e-06	2.92514	13.886	33					1.16399e-05	2.61519	15.311	33	7.73312e-06	2.67408	15.0181	33					3.85276e-06	2.74042	15.2472	34	6.36652e-06	2.70224	14.8819	33
GO:0019199	MF	transmembrane receptor protein kinase activity	53	1.81094e-06	4.67387	5.26396	18	1.2925e-06	4.79649	5.14276	18					3.43373e-06	4.30131	6.10436	19	1.95316e-06	4.48826	5.87881	19					8.80012e-06	4.00021	6.5065	19	6.45115e-06	4.09811	6.37005	19					8.47297e-06	4.01208	6.48965	19	5.76929e-06	4.13367	6.32189	19
GO:0070328	BP	triglyceride homeostasis	6	1.52916e-06		0.644207	6	1.34701e-06		0.630736	6					3.56376e-06		0.741734	6	2.90269e-06		0.716806	6					5.22415e-06		0.790542	6	4.64256e-06		0.775147	6					5.0971e-06		0.787305	6	4.41168e-06		0.768587	6
GO:0055091	BP	phospholipid homeostasis	6	1.52916e-06		0.644207	6	1.34701e-06		0.630736	6					3.56376e-06		0.741734	6	2.90269e-06		0.716806	6					5.22415e-06		0.790542	6	4.64256e-06		0.775147	6					5.0971e-06		0.787305	6	4.41168e-06		0.768587	6
GO:1900910	BP	positive regulation of olefin metabolic process	6																									5.22415e-06		0.790542	6	4.64256e-06		0.775147	6					0.000207695	33.1225	0.787305	5	0.000184684	34.0515	0.768587	5
GO:0010365	BP	positive regulation of ethylene biosynthetic process	6																									5.22415e-06		0.790542	6	4.64256e-06		0.775147	6					0.000207695	33.1225	0.787305	5	0.000184684	34.0515	0.768587	5
GO:0051501	BP	diterpene phytoalexin metabolic process	26	6.67597e-07	8.32671	2.79156	13	5.22476e-07	8.52626	2.73319	13					3.36053e-06	7.0985	3.21418	13	2.27814e-06	7.38059	3.10616	13					9.4979e-07	7.6984	3.42568	14	7.44845e-07	7.87474	3.35897	14					6.58515e-06	6.62906	3.41166	13	5.02371e-06	6.81514	3.33054	13
GO:0030162	BP	regulation of proteolysis	357	5.30722e-08	2.14838	38.3303	73	2.25899e-08	2.20027	37.5288	73					3.60851e-07	1.99103	44.1332	78	1.87823e-07	2.03662	42.6499	77					2.21289e-06	1.88032	47.0372	79	1.03357e-06	1.92369	46.1213	79					3.61938e-06	1.85845	46.8447	78	5.36617e-06	1.84825	45.7309	76
GO:0005887	CC	integral component of plasma membrane	852	7.42943e-10	1.80371	90.3235	149	6.70401e-09	1.755	88.5052	143					5.8734e-06	1.52427	103.819	148	1.35954e-05	1.50727	100.331	142					6.11828e-07	1.57119	110.659	161	1.22723e-06	1.55744	108.532	157					1.53302e-08	1.66454	110.276	168	6.68704e-08	1.63518	107.653	162
GO:0009239	BP	enterobactin biosynthetic process	117	0.000593156	2.26347	12.562	25									1.2093e-07	3.1599	14.4638	36	1.62234e-06	2.90321	13.9777	33					1.34307e-05	2.59465	15.4156	33	8.87276e-06	2.6542	15.1154	33					4.48829e-06	2.71868	15.3525	34	7.40554e-06	2.68031	14.9874	33
GO:0019290	BP	siderophore biosynthetic process	117	0.000593156	2.26347	12.562	25									1.2093e-07	3.1599	14.4638	36	1.62234e-06	2.90321	13.9777	33					1.34307e-05	2.59465	15.4156	33	8.87276e-06	2.6542	15.1154	33					4.48829e-06	2.71868	15.3525	34	7.40554e-06	2.68031	14.9874	33
GO:0098771	BP	inorganic ion homeostasis	90	1.10599e-05	3.14428	9.34942	24	7.74137e-06	3.21924	9.15447	24					1.32496e-05	2.98755	10.7939	26	7.13215e-06	3.10691	10.4284	26					1.41235e-05	2.92469	11.5236	27	9.87179e-06	2.99078	11.3016	27					4.0498e-06	3.10372	11.4546	28	2.53996e-06	3.18965	11.1852	28
GO:0010063	BP	positive regulation of trichoblast fate specification	211	3.89746e-07	2.45773	22.6546	48	2.09179e-07	2.5169	22.1809	48					3.94921e-06	2.20873	26.0843	50	1.48182e-06	2.29688	25.2077	50					1.06331e-05	2.10672	27.8007	51	6.12808e-06	2.15517	27.2593	51					1.90991e-06	2.22818	27.6869	53	9.18491e-07	2.29099	27.0286	53
GO:0010455	BP	positive regulation of cell fate commitment	211	3.89746e-07	2.45773	22.6546	48	2.09179e-07	2.5169	22.1809	48					3.94921e-06	2.20873	26.0843	50	1.48182e-06	2.29688	25.2077	50					1.06331e-05	2.10672	27.8007	51	6.12808e-06	2.15517	27.2593	51					1.90991e-06	2.22818	27.6869	53	9.18491e-07	2.29099	27.0286	53
GO:0072511	BP	divalent inorganic cation transport	1529	3.17974e-06	1.41722	164.165	221	6.71923e-06	1.40494	160.733	215					1.76504e-05	1.35637	189.019	244	3.2307e-05	1.34853	182.666	235					8.93926e-06	1.36051	201.456	260	1.50259e-05	1.35292	197.533	254					4.23487e-07	1.41964	200.632	268	2.16284e-06	1.3932	195.862	258
GO:0019759	BP	glycosinolate catabolic process	113	2.06752e-06	3.01318	12.1326	30	4.15308e-06	2.94673	11.8789	29					4.80957e-07	3.05928	13.9693	34	2.10485e-06	2.91929	13.4998	32					5.98292e-06	2.72456	14.8885	33	1.09977e-05	2.66893	14.5986	32					2.03378e-07	3.10391	14.8276	36	1.09783e-06	2.93689	14.4751	34
GO:0015238	MF	drug transmembrane transporter activity	408	6.15151e-05	1.68881	47.8307	75	3.08424e-05	1.72967	46.8283	75					7.40169e-08	1.92882	55.0932	95	7.40524e-06	1.80423	47.5067	78					2.23071e-06	1.82388	52.3969	86	3.55533e-06	1.81012	51.388	84					5.6717e-09	1.99951	58.4656	103	5.25727e-08	1.92763	57.0649	98
GO:0031347	BP	regulation of defense response	496													2.40067e-05	1.68482	54.4643	85	1.78384e-05	1.71041	52.3882	83					3.08438e-05	1.65406	58.1553	89	1.30858e-05	1.69791	56.8404	89					3.05507e-06	1.75166	58.0092	93	9.6124e-07	1.80746	56.4405	93
GO:0006664	BP	glycolipid metabolic process	692	1.00228e-07	1.75648	74.2985	120	1.04624e-07	1.76247	72.7449	118					5.55412e-06	1.58687	85.5467	126	2.78067e-06	1.6184	82.6716	124					2.89163e-06	1.59125	91.1758	134	2.76262e-06	1.59773	89.4003	132					1.43067e-06	1.61392	90.8026	135	2.90859e-06	1.59832	88.6437	131
GO:0046677	BP	response to antibiotic	163	2.21085e-05	2.4389	15.4113	33	1.35824e-05	2.50453	15.0467	33					1.95455e-06	2.56747	17.8429	39	5.40465e-06	2.50109	17.1779	37					9.3486e-06	2.3843	19.0472	39	1.37081e-05	2.36313	18.6286	38					3.45854e-06	2.4748	18.9856	40	1.16016e-05	2.38286	18.4926	38
GO:0002697	BP	regulation of immune effector process	74	6.37602e-06	3.52491	7.94522	22	4.52414e-06	3.60948	7.77908	22					5.28242e-06	3.40961	9.14806	24	2.90162e-06	3.54528	8.8406	24					5.02446e-05	2.97687	9.75001	23	3.67717e-05	3.04513	9.56015	23					1.85187e-08	4.27738	9.7101	29	1.07357e-08	4.39765	9.47924	29
GO:0072550	MF	triferuloylspermidine meta-hydroxylase activity	11	3.48021e-05	14.6831	1.17236	7	3.02817e-05	15.0336	1.1479	7					8.83248e-05	12.5062	1.35121	7	7.05504e-05	13.0055	1.30552	7					9.77529e-06	17.7259	1.43949	8	8.4383e-06	18.124	1.41196	8					9.46974e-06	17.8113	1.4335	8	7.87267e-06	18.3144	1.39916	8
GO:0072551	MF	diferuloyl mono-(hydroxyferuloyl) spermidine meta-hydroxylase activity	11	3.48021e-05	14.6831	1.17236	7	3.02817e-05	15.0336	1.1479	7					8.83248e-05	12.5062	1.35121	7	7.05504e-05	13.0055	1.30552	7					9.77529e-06	17.7259	1.43949	8	8.4383e-06	18.124	1.41196	8					9.46974e-06	17.8113	1.4335	8	7.87267e-06	18.3144	1.39916	8
GO:0072552	MF	monoferuloyl di-(hydroxyferuloyl) spermidine meta-hydroxylase activity	11	3.48021e-05	14.6831	1.17236	7	3.02817e-05	15.0336	1.1479	7					8.83248e-05	12.5062	1.35121	7	7.05504e-05	13.0055	1.30552	7					9.77529e-06	17.7259	1.43949	8	8.4383e-06	18.124	1.41196	8					9.46974e-06	17.8113	1.4335	8	7.87267e-06	18.3144	1.39916	8
GO:0072547	MF	tricoumaroylspermidine meta-hydroxylase activity	11	3.48021e-05	14.6831	1.17236	7	3.02817e-05	15.0336	1.1479	7					8.83248e-05	12.5062	1.35121	7	7.05504e-05	13.0055	1.30552	7					9.77529e-06	17.7259	1.43949	8	8.4383e-06	18.124	1.41196	8					9.46974e-06	17.8113	1.4335	8	7.87267e-06	18.3144	1.39916	8
GO:0072548	MF	dicoumaroyl monocaffeoyl spermidine meta-hydroxylase activity	11	3.48021e-05	14.6831	1.17236	7	3.02817e-05	15.0336	1.1479	7					8.83248e-05	12.5062	1.35121	7	7.05504e-05	13.0055	1.30552	7					9.77529e-06	17.7259	1.43949	8	8.4383e-06	18.124	1.41196	8					9.46974e-06	17.8113	1.4335	8	7.87267e-06	18.3144	1.39916	8
GO:0072549	MF	monocoumaroyl dicaffeoyl spermidine meta-hydroxylase activity	11	3.48021e-05	14.6831	1.17236	7	3.02817e-05	15.0336	1.1479	7					8.83248e-05	12.5062	1.35121	7	7.05504e-05	13.0055	1.30552	7					9.77529e-06	17.7259	1.43949	8	8.4383e-06	18.124	1.41196	8					9.46974e-06	17.8113	1.4335	8	7.87267e-06	18.3144	1.39916	8
GO:0090558	BP	plant epidermis development	3965	4.4273e-05	1.22018	425.713	502	5.96403e-05	1.21799	416.812	491					0.000117706	1.19339	490.163	566	0.00026899	1.18427	473.689	544					6.42318e-06	1.22507	522.416	615	5.28362e-06	1.22934	512.243	605					9.78388e-05	1.19094	520.278	599	0.000236839	1.18055	507.908	581
GO:2000067	BP	regulation of root morphogenesis	236	9.0807e-07	2.30092	25.3388	51	4.82465e-07	2.35633	24.809	51					5.08781e-06	2.11045	29.1749	54	1.83337e-06	2.19472	28.1944	54					1.53261e-05	2.00854	31.0946	55	8.66916e-06	2.05475	30.4891	55					3.03104e-06	2.1154	30.9673	57	1.42403e-06	2.17507	30.2311	57
GO:0009916	MF	alternative oxidase activity	17	1.79733e-06	11.9906	1.81183	10	1.47826e-06	12.2769	1.77403	10					6.63362e-06	10.2123	2.08823	10	4.84283e-06	10.6201	2.01763	10					1.18003e-05	9.49752	2.22467	10	9.90243e-06	9.71087	2.18211	10					1.13621e-05	9.54326	2.21541	10	9.11566e-06	9.81288	2.16233	10
GO:0046149	BP	pigment catabolic process	437	0.000278142	1.61875	46.9197	71	0.000149916	1.65785	45.9386	71					2.64392e-05	1.69381	54.023	84	7.49811e-06	1.76169	52.2073	84					5.21171e-05	1.64422	57.5778	87	2.55191e-05	1.68218	56.4566	87					8.74295e-06	1.72449	57.3421	90	6.00039e-06	1.74833	55.9788	89
GO:0072488	BP	ammonium transmembrane transport	39	5.76107e-06	5.20468	4.18734	15	4.43378e-06	5.32944	4.09979	15					2.07317e-07	6.08721	4.82127	18	4.20801e-06	5.13536	4.65924	16					1.49881e-05	4.59052	5.13852	16	1.16439e-05	4.69569	5.03846	16					2.83528e-06	5.12396	5.11748	17	2.0253e-06	5.26785	4.99582	17
GO:0033473	BP	indoleacetic acid conjugate metabolic process	35	6.86937e-06	5.55117	3.75787	14	5.3614e-06	5.68422	3.6793	14					6.69973e-06	5.32451	4.32678	15	4.37412e-06	5.53616	4.18137	15					1.46981e-05	4.94885	4.61149	15	1.15489e-05	5.06222	4.52169	15					1.39784e-05	4.97232	4.59261	15	1.04021e-05	5.11192	4.48342	15
GO:0031225	CC	anchored component of membrane	804	4.02367e-08	1.72616	84.7504	135	1.95748e-07	1.68766	83.0215	130					1.71954e-06	1.57892	97.4289	143	2.99594e-06	1.57126	94.1946	138					2.04058e-05	1.49051	103.909	145	2.6938e-05	1.48613	101.886	142					3.78135e-05	1.4723	103.474	143	2.70463e-05	1.48781	101.028	141
GO:0042430	BP	indole-containing compound metabolic process	36	6.80472e-06	5.50562	3.7354	14	5.27089e-06	5.64133	3.65481	14					6.77739e-06	5.26473	4.30647	15	4.41637e-06	5.47451	4.16076	15					1.50528e-05	4.88839	4.5952	15	1.1847e-05	4.99941	4.50607	15					1.43842e-05	4.90933	4.57812	15	1.06965e-05	5.04726	4.46871	15
GO:1903888	BP	regulation of plant epidermal cell differentiation	214	6.04114e-07	2.4132	22.9767	48	3.26551e-07	2.47129	22.4963	48					6.02312e-06	2.16821	26.4552	50	2.29036e-06	2.25475	25.5661	50					1.6084e-05	2.06784	28.196	51	9.34665e-06	2.1154	27.6469	51					3.00105e-06	2.18655	28.0806	53	1.45794e-06	2.24819	27.4129	53
GO:0090628	BP	plant epidermal cell fate specification	214	6.04114e-07	2.4132	22.9767	48	3.26551e-07	2.47129	22.4963	48					6.02312e-06	2.16821	26.4552	50	2.29036e-06	2.25475	25.5661	50					1.6084e-05	2.06784	28.196	51	9.34665e-06	2.1154	27.6469	51					3.00105e-06	2.18655	28.0806	53	1.45794e-06	2.24819	27.4129	53
GO:0009631	BP	cold acclimation	322	1.64284e-05	1.91134	34.5724	60	8.6934e-06	1.95744	33.8495	60					3.35211e-06	1.94106	39.8064	69	8.12595e-06	1.90751	38.4686	66					2.08902e-06	1.93952	42.4257	73	4.00767e-06	1.91399	41.5996	71					3.54903e-06	1.91414	42.2521	72	1.48922e-06	1.96821	41.2475	72
GO:0010071	BP	root meristem specification	228	1.73282e-06	2.28438	24.4799	49	9.46142e-07	2.33939	23.968	49					1.76711e-05	2.04895	28.1859	51	6.88467e-06	2.13073	27.2386	51					2.32963e-05	2.00162	30.0406	53	1.34674e-05	2.04766	29.4556	53					4.64335e-06	2.11171	29.9176	55	2.24092e-06	2.17126	29.2063	55
GO:0016709	MF	oxidoreductase activity. acting on paired donors. with incorporation or reduction of molecular oxygen. NAD(P)H as one donor. and incorporation of one atom of oxygen	268	0.000190831	1.85473	28.2864	48	0.000224237	1.85122	27.6923	47					9.00008e-06	1.99892	32.6351	58	5.41161e-05	1.89912	31.5222	54					7.9397e-07	2.11336	34.758	64	8.16032e-06	1.98599	34.0926	60					1.32362e-05	1.95011	34.6352	60	2.53264e-05	1.92001	33.7995	58
GO:0042659	BP	regulation of cell fate specification	217	9.2523e-07	2.37024	23.2988	48	5.03704e-07	2.42731	22.8116	48					9.07118e-06	2.12916	26.8261	50	3.49568e-06	2.21414	25.9245	50					2.40173e-05	2.03037	28.5913	51	1.40728e-05	2.07706	28.0345	51					4.65185e-06	2.14644	28.4742	53	2.28292e-06	2.20695	27.7972	53
GO:0008144	MF	drug binding	1345	1.31299e-05	1.73902	49.4295	80	9.38353e-06	1.76333	48.168	79					2.07991e-05	1.66994	57.425	89	4.17301e-06	1.75087	55.0783	89					4.67298e-05	1.61682	61.2094	92	1.97145e-05	1.6599	59.8181	92					3.18339e-05	1.63216	61.4135	93	1.71912e-05	1.66669	59.6048	92
GO:0017119	CC	Golgi transport complex	119	5.01911e-06	2.8501	12.6156	30	3.33144e-06	2.91586	12.3616	30					2.83438e-05	2.54439	14.5005	31	1.44536e-05	2.64549	14.0133	31					3.82057e-05	2.46937	15.4559	32	2.59708e-05	2.52519	15.1588	32					4.99982e-06	2.6969	15.4024	34	2.20632e-05	2.54888	15.0361	32
GO:0046943	MF	carboxylic acid transmembrane transporter activity	702	0.000162142	1.49819	74.8181	106	0.000113286	1.51718	73.257	105					1.94853e-06	1.61718	86.2316	129	4.14936e-06	1.60233	83.3162	124					4.3593e-06	1.57553	91.8659	134	6.76586e-06	1.56643	90.1084	131					8.97516e-06	1.55371	91.4834	132	6.89671e-06	1.56807	89.2917	130
GO:0010018	BP	far-red light signaling pathway	77	3.62647e-06	3.54902	8.26732	23	9.22905e-06	3.41244	8.09445	22					3.67679e-05	3.02495	9.51892	23	2.12502e-05	3.1453	9.19901	23					3.06828e-06	3.36628	10.1453	26	2.1195e-06	3.44348	9.94772	26					3.08946e-05	3.0035	10.1038	24	2.07069e-05	3.08791	9.86353	24
GO:0044070	BP	regulation of anion transport	373	0.000140866	1.72142	39.5148	63	7.66208e-05	1.76378	38.6714	63					1.78905e-05	1.78418	45.594	74	5.34779e-06	1.85687	44.0331	74					4.40568e-06	1.82971	48.6062	80	2.05422e-06	1.87265	47.6423	80					2.31916e-05	1.75125	48.3981	77	9.86221e-06	1.80138	47.2316	77
GO:0055062	BP	phosphate ion homeostasis	97	7.18315e-05	2.73896	10.4147	24	5.13241e-05	2.8047	10.1969	24					3.30841e-05	2.73993	11.9914	27	1.79328e-05	2.84899	11.5884	27					3.69827e-05	2.6793	12.7804	28	2.58165e-05	2.74076	12.5315	28					4.01414e-06	2.97117	12.7281	30	2.44654e-06	3.05472	12.4255	30
GO:0051865	BP	protein autoubiquitination	87	3.2981e-05	2.99399	9.341	23	2.35646e-05	3.06584	9.14568	23					0.000103096	2.70546	10.7551	24	5.99118e-05	2.81311	10.3937	24					1.19869e-05	2.97127	11.4629	27	8.32398e-06	3.03942	11.2396	27					1.11122e-05	2.98537	11.4159	27	7.10219e-06	3.0693	11.1445	27
GO:0015180	MF	L-alanine transmembrane transporter activity	25	0.000730754	4.71993	2.66446	9	0.000625713	4.83264	2.60887	9					8.09886e-05	5.61677	3.07092	11	5.88414e-05	5.84111	2.9671	11					3.63051e-06	7.20411	3.27158	13	2.91393e-06	7.36599	3.20899	13					0.000706748	4.45292	3.25796	10	0.000581338	4.57873	3.1799	10
GO:0015185	MF	gamma-aminobutyric acid transmembrane transporter activity	18	0.000270317	6.71252	1.91841	8	0.000233304	6.87279	1.87839	8					1.32733e-05	8.9356	2.21107	10	9.73059e-06	9.29246	2.13631	10					2.50368e-06	10.4485	2.35554	11	2.06116e-06	10.6832	2.31047	11					0.000172205	6.6793	2.34573	9	0.000142392	6.86799	2.28953	9
GO:0008107	MF	galactoside 2-alpha-L-fucosyltransferase activity	18													1.32733e-05	8.9356	2.21107	10	9.73059e-06	9.29246	2.13631	10					2.34211e-05	8.31019	2.35554	10	1.9704e-05	8.49687	2.31047	10					0.000172205	6.6793	2.34573	9	0.000142392	6.86799	2.28953	9
GO:0046942	BP	carboxylic acid transport	434	7.28811e-05	1.70353	44.868	71	3.7153e-05	1.74535	43.9113	71					1.73979e-05	1.72709	51.7783	82	4.84211e-06	1.79699	50.0135	82					3.52725e-05	1.67431	55.3077	85	1.70729e-05	1.71335	54.2153	85					2.98032e-05	1.68341	55.0491	85	1.22283e-05	1.73119	53.7304	85
GO:0051176	BP	positive regulation of sulfur metabolic process	25													0.000461365	4.7305	3.09056	10	0.000348865	4.91843	2.98669	10					2.65068e-05	6.08959	3.29392	12	2.16684e-05	6.22905	3.22978	12					2.54171e-05	6.11845	3.28044	12	0.000119193	5.35344	3.20245	11
GO:0015812	BP	gamma-aminobutyric acid transport	18	0.000284585	6.65717	1.93262	8	0.000245583	6.8166	1.89221	8					1.40579e-05	8.87072	2.2252	10	1.03276e-05	9.22312	2.15042	10					2.68115e-06	10.3667	2.37163	11	2.19983e-06	10.6041	2.32544	11					0.000181723	6.62656	2.36192	9	0.000150516	6.81249	2.30576	9
GO:0004089	MF	carbonate dehydratase activity	64	6.44041e-06	3.81813	6.82102	20	4.67582e-06	3.90944	6.6787	20					1.48787e-05	3.49368	7.86157	21	8.7271e-06	3.63338	7.59578	21					3.89462e-05	3.24887	8.37524	21	2.91159e-05	3.32194	8.21501	21					6.97374e-07	4.01228	8.34037	24	4.4574e-07	4.12581	8.14055	24
GO:0090057	BP	root radial pattern formation	33	2.98641e-06	6.13571	3.54314	14	2.32028e-06	6.28276	3.46905	14					7.98158e-05	4.61349	4.07954	13	5.57336e-05	4.79683	3.94243	13					6.08762e-06	5.49891	4.34798	15	4.75785e-06	5.62488	4.26331	15					5.78307e-06	5.52498	4.33018	15	4.2757e-06	5.6801	4.22723	15
GO:0005992	BP	trehalose biosynthetic process	83					0.000842488	2.53124	8.72519	19					1.31032e-06	3.42571	10.2607	27	2.38424e-06	3.36949	9.91581	26					1.32875e-06	3.36209	10.9358	28	8.92791e-07	3.43922	10.7229	28					4.14364e-06	3.19883	10.8911	27	2.61346e-06	3.28875	10.6321	27
GO:0007030	BP	Golgi organization	1604	2.71237e-05	1.36045	172.218	224	6.96275e-06	1.39401	168.617	224					0.000611866	1.26723	198.29	242	0.000194978	1.29923	191.626	239					5.78036e-05	1.31335	211.338	265	3.68925e-05	1.32557	207.223	262					0.000103192	1.30138	210.473	262	6.74051e-05	1.31389	205.469	258
GO:0009691	BP	cytokinin biosynthetic process	131	6.62787e-06	2.69465	14.0652	32	4.26385e-06	2.75938	13.7711	32					0.000569526	2.10961	16.1945	30	0.000715852	2.09942	15.6503	29					4.03058e-06	2.60038	17.2602	37	6.80906e-06	2.56062	16.924	36					6.03913e-05	2.32575	17.1895	34	3.70103e-05	2.39118	16.7808	34
GO:0004758	MF	serine C-palmitoyltransferase activity	7	0.000239559	20.9707	0.74605	5	0.000216458	21.4712	0.730483	5					2.14834e-05	42.8753	0.859859	6	1.7546e-05	44.5869	0.830788	6					3.11693e-05	39.8757	0.916042	6	2.78245e-05	40.7711	0.898517	6					3.04145e-05	40.0676	0.912228	6	2.63743e-05	41.1992	0.890373	6
GO:0003861	MF	3-isopropylmalate dehydratase activity	7													0.000472957	17.8623	0.859859	5	0.000401281	18.5752	0.830788	5					3.11693e-05	39.8757	0.916042	6	2.78245e-05	40.7711	0.898517	6					3.04145e-05	40.0676	0.912228	6	2.63743e-05	41.1992	0.890373	6
GO:0004708	MF	MAP kinase kinase activity	30													0.00055212	4.13833	3.68511	11	0.000409488	4.30362	3.56052	11					4.41116e-05	5.08482	3.92589	13	3.58636e-05	5.19909	3.85079	13					0.00020966	4.4537	3.90955	12	0.000166028	4.57956	3.81588	12
GO:0022610	BP	biological adhesion	1351	1.81636e-05	1.40467	145.054	194	7.40655e-06	1.4303	142.021	193					0.000288369	1.31249	167.014	210	0.000201818	1.32662	161.401	205					0.000296615	1.30321	178.004	222	0.000130693	1.32641	174.537	221					0.000414803	1.2951	177.275	220	0.000348222	1.30278	173.06	216
GO:0009094	BP	L-phenylalanine biosynthetic process	30													0.000125966	4.73138	3.70867	12	9.01981e-05	4.91939	3.58403	12					8.51106e-06	5.77341	3.95271	14	6.74615e-06	5.90566	3.87574	14					4.54075e-05	5.06894	3.93653	13	3.50876e-05	5.21123	3.84294	13
GO:0015297	MF	antiporter activity	606													1.8207e-05	1.59146	74.4392	110	2.9791e-05	1.58191	71.9225	106					1.60501e-05	1.57986	79.3031	116	2.85358e-05	1.56378	77.7859	113					1.05504e-06	1.67416	78.9729	121	4.38937e-06	1.63294	77.0809	116
GO:0043169	MF	cation binding	411	6.93488e-07	1.96896	41.4819	74	1.21471e-06	1.95228	40.5626	72					6.21838e-06	1.80691	48.0592	79	3.53918e-05	1.73515	46.3775	74					5.65512e-05	1.68092	51.176	79	5.01671e-05	1.69281	50.167	78					7.55526e-07	1.8791	50.9966	86	3.44467e-06	1.82187	49.7036	82
GO:0097237	BP	cellular response to toxic substance	173	6.59505e-07	2.62113	18.386	41	2.68124e-06	2.51508	17.9964	39					9.45887e-06	2.30423	21.1839	42	5.21181e-05	2.17521	20.4629	39					1.95658e-05	2.20869	22.5853	43	6.11548e-05	2.12168	22.1401	41					7.61835e-06	2.28882	22.4917	44	2.23895e-05	2.21212	21.9504	42
GO:0034279	MF	syn-pimara-7.15-diene synthase activity	5	1.37345e-05		0.532893	5	1.23598e-05		0.521774	5					2.79376e-05		0.614185	5	2.35226e-05		0.59342	5					3.83409e-05		0.654316	5	3.48102e-05		0.641798	5					3.75491e-05		0.651591	5	3.32607e-05		0.635981	5
GO:0003796	MF	lysozyme activity	5	1.37345e-05		0.532893	5	1.23598e-05		0.521774	5					2.79376e-05		0.614185	5	2.35226e-05		0.59342	5					3.83409e-05		0.654316	5	3.48102e-05		0.641798	5					3.75491e-05		0.651591	5	3.32607e-05		0.635981	5
GO:1901684	BP	arsenate ion transmembrane transport	5	0.000606969	33.2727	0.536839	4	0.000558859	34.0691	0.525614	4					2.88427e-05		0.618112	5	2.431e-05		0.597338	5					3.96689e-05		0.658785	5	3.59532e-05		0.645956	5					3.88634e-05		0.656088	5	3.44571e-05		0.640489	5
GO:0042546	BP	cell wall biogenesis	2083													1.77139e-05	1.30297	257.505	321	2.66689e-05	1.30004	248.851	310					3.52937e-05	1.28243	274.45	337	3.68521e-05	1.28407	269.105	331					0.000243149	1.24639	273.326	328	0.000149346	1.25866	266.828	323
GO:0030001	BP	metal ion transport	3527	3.64948e-05	1.30029	235.166	294	0.000163074	1.27306	230.28	283	0.000375363	2.60515	7.91822	19	1.97568e-05	1.29254	271.276	336	0.000153251	1.2588	262.106	318	0.000401229	2.09894	14.6538	29	1.88509e-05	1.28516	289.381	356	8.53728e-05	1.2608	283.825	344					1.54301e-07	1.36069	287.975	371	2.75548e-06	1.32058	281.215	354	8.96713e-05	2.55304
GO:0051365	BP	cellular response to potassium ion starvation	179	0.000159102	2.09835	19.2188	36	0.000484855	2.0008	18.817	34					6.33945e-05	2.11157	22.1284	41	0.00014022	2.05824	21.3847	39					5.813e-05	2.0887	23.5845	43	3.65541e-05	2.13669	23.1252	43					0.000470812	1.90934	23.4879	40	0.00028808	1.9631	22.9295	40
GO:0004425	MF	indole-3-glycerol-phosphate synthase activity	10	1.39486e-05	19.5777	1.06579	7	1.21111e-05	20.0451	1.04355	7					3.59576e-05	16.6752	1.22837	7	2.86066e-05	17.3409	1.18684	7					5.47053e-05	15.5084	1.30863	7	4.81382e-05	15.8567	1.2836	7					5.32155e-05	15.5831	1.30318	7	4.53197e-05	16.0232	1.27196	7
GO:0032953	BP	regulation of (1->3)-beta-D-glucan biosynthetic process	10	0.000218599	12.48	1.07368	6	0.000194186	12.7788	1.05123	6					3.75131e-05	16.5542	1.23622	7	2.98879e-05	17.2116	1.19468	7					5.72258e-05	15.3872	1.31757	7	5.02428e-05	15.7394	1.29191	7					5.56939e-05	15.4601	1.31218	7	4.74926e-05	15.8938	1.28098	7
GO:0008509	MF	anion transmembrane transporter activity	1380	0.000906723	1.29462	149.743	187	0.000798845	1.3012	146.618	184					3.87946e-06	1.41095	169.374	226	1.87568e-05	1.38198	163.641	215					1.78773e-05	1.36699	180.454	234	2.59079e-05	1.36177	176.998	229					6.9084e-06	1.38828	179.702	236	2.76986e-05	1.36169	175.392	227
GO:0009098	BP	leucine biosynthetic process	31													0.000182464	4.48229	3.83229	12	0.000131199	4.66039	3.7035	12					7.18561e-05	4.76467	4.08447	13	5.83751e-05	4.8738	4.00493	13					1.29982e-05	5.45947	4.06774	14	9.80912e-06	5.61273	3.97103	14
GO:0009226	BP	nucleotide-sugar biosynthetic process	163													0.000170082	2.08648	20.1504	37	8.43516e-05	2.16963	19.4732	37					4.96575e-06	2.36783	21.4764	43	2.98827e-06	2.42223	21.0582	43					0.000266204	2.01706	21.3885	38	0.000162966	2.07383	20.8799	38
GO:0015809	BP	arginine transport	44	1.2869e-06	5.2444	4.72418	17	9.565e-07	5.37014	4.6254	17																	4.6561e-06	4.56923	5.79731	18	3.50801e-06	4.67394	5.68441	18					1.98734e-05	4.17473	5.77357	17	1.44292e-05	4.29196	5.63631	17
GO:0070588	BP	calcium ion transmembrane transport	158	0.00013926	2.20022	16.9641	33	9.32155e-05	2.25308	16.6094	33					0.000190882	2.09654	19.5323	36	9.61669e-05	2.18008	18.8759	36					2.93737e-05	2.23929	20.8176	40	1.86218e-05	2.29073	20.4122	40					4.65609e-06	2.40378	20.7324	42	2.51926e-06	2.47147	20.2395	42
GO:0042626	MF	ATPase activity. coupled to transmembrane movement of substances	663	1.41651e-05	1.6094	70.4581	106	1.58626e-05	1.61111	68.9814	104					1.98098e-05	1.56024	81.1563	118	1.09862e-05	1.58963	78.4084	116					3.45709e-05	1.52567	86.4859	123	3.56083e-05	1.52909	84.8235	121					1.8246e-05	1.54868	86.1241	124	1.50672e-05	1.56107	84.0607	122
GO:0009966	BP	regulation of signal transduction	2008													0.000298263	1.39216	107.982	143	8.76344e-05	1.43876	104.174	142					7.26852e-05	1.42546	115.141	155	2.57439e-05	1.46031	112.777	155					0.000259001	1.38642	114.722	151	0.000117849	1.41586	111.886	150
GO:0009617	BP	response to bacterium	803	7.12067e-05	1.52442	74.7088	108	6.70256e-05	1.53276	72.9048	106					9.04442e-06	1.55802	86.9206	127	6.0719e-06	1.58072	83.6784	124					0.000128257	1.45401	93.0896	128	7.3787e-05	1.47773	91.0332	127					6.988e-05	1.47582	92.648	129	5.02984e-05	1.49266	90.2385	127
GO:1902290	BP	positive regulation of defense response to oomycetes	40	4.08564e-05	4.48327	4.29471	14	3.22492e-05	4.59073	4.20491	14					0.000190747	3.82189	4.94489	14	0.000132098	3.97379	4.7787	14					9.51825e-05	3.95875	5.27028	15	7.57849e-05	4.04944	5.16765	15					9.07746e-05	3.97752	5.2487	15	6.86453e-05	4.08919	5.12391	15
GO:0010298	MF	dihydrocamalexic acid decarboxylase activity	28	0.00040131	4.66215	2.9842	10	0.000338067	4.77349	2.92193	10					5.27635e-05	5.36193	3.43944	12	3.73709e-05	5.57612	3.32315	12					9.88464e-05	4.98656	3.66417	12	8.1694e-05	5.0986	3.59407	12					9.48669e-05	5.01058	3.64891	12	7.4652e-05	5.15217	3.56149	12
GO:0002213	BP	defense response to insect	194	3.996e-05	2.16576	20.8293	40	5.58723e-05	2.14811	20.3938	39					0.000197167	1.96362	23.9827	42	0.000193144	1.98	23.1767	41					4.32512e-06	2.23356	25.5608	49	5.74927e-06	2.22267	25.0631	48					8.76695e-06	2.18305	25.4562	48	1.03618e-05	2.18256	24.851	47
GO:0015174	MF	basic amino acid transmembrane transporter activity	84	5.05731e-05	2.98055	8.95259	22	3.6701e-05	3.05184	8.7658	22					5.05e-05	2.8617	10.3183	24																					0.000129285	2.67395	10.9467	24	8.82581e-05	2.74961	10.6845	24
GO:0000987	MF	proximal promoter sequence-specific DNA binding	69	7.73454e-05	3.1912	7.35392	19	5.8108e-05	3.26751	7.20048	19					4.39471e-06	3.57754	8.47575	23	2.44097e-06	3.72063	8.1892	23					4.23971e-05	3.11405	9.02956	22	3.14308e-05	3.1841	8.85681	22					1.185e-05	3.34285	8.99196	23	7.91247e-06	3.43743	8.77653	23
GO:0035264	BP	multicellular organism growth	28	1.34889e-05	6.24388	3.0063	12	1.08529e-05	6.39349	2.94344	12					5.62325e-05	5.32298	3.46143	12	3.99304e-05	5.53449	3.34509	12					0.000105695	4.94754	3.68919	12	8.70812e-05	5.06085	3.61735	12					0.000101517	4.97099	3.67409	12	8.00646e-05	5.11051	3.58674	12
GO:0016621	MF	cinnamoyl-CoA reductase activity	95	1.37277e-06	3.33717	10.125	27	3.12774e-06	3.24229	9.9137	26					5.63287e-05	2.69605	11.6695	26	3.12501e-05	2.80392	11.275	26					0.000161436	2.50703	12.432	26	0.000117591	2.56345	12.1942	26					0.000386024	2.38732	12.3802	25	0.000265889	2.45488	12.0836	25
GO:0042754	BP	negative regulation of circadian rhythm	74	1.69436e-06	3.75797	7.94522	23	4.52414e-06	3.60948	7.77908	22					5.8241e-05	3.00446	9.14806	22	3.45038e-05	3.12398	8.8406	22					0.000150898	2.79233	9.75001	22	0.000112871	2.85634	9.56015	22					0.000403475	2.62718	9.7101	21	0.000290081	2.70099	9.47924	21
GO:0008195	MF	phosphatidate phosphatase activity	55	4.28281e-07	4.80065	5.86182	20	3.04602e-07	4.91545	5.73951	20																	4.02043e-05	3.51064	7.19747	19	3.06476e-05	3.58958	7.05978	19					9.95807e-06	3.81981	7.1675	20	6.88772e-06	3.92785	6.99579	20
GO:0044242	BP	cellular lipid catabolic process	1462	1.66581e-05	1.39002	156.972	208	2.58489e-05	1.38337	153.689	203					0.000180352	1.31136	180.736	227	0.000108772	1.32845	174.662	222					8.81938e-06	1.36949	192.629	250	1.58903e-05	1.36022	188.878	244					0.000332968	1.28854	191.84	237	0.000253233	1.29833	187.279	233
GO:0006690	BP	icosanoid metabolic process	37	1.46845e-05	5.0683	3.97261	14	1.15129e-05	5.18977	3.88954	14					1.5151e-05	4.8403	4.57403	15	4.92459e-05	4.49234	4.4203	14					3.2685e-05	4.49881	4.87501	15	0.000116859	4.1078	4.78007	14					0.000138433	4.03485	4.85505	14	0.000106495	4.14812	4.73962	14
GO:0047769	MF	arogenate dehydratase activity	21													0.000462712	5.36036	2.57958	9	0.000356702	5.57441	2.49236	9					1.89832e-05	7.31354	2.74813	11	1.57482e-05	7.47785	2.69555	11					0.000125181	6.07257	2.73668	10	0.0001017	6.24414	2.67112	10
GO:0004664	MF	prephenate dehydratase activity	21													0.000462712	5.36036	2.57958	9	0.000356702	5.57441	2.49236	9					1.89832e-05	7.31354	2.74813	11	1.57482e-05	7.47785	2.69555	11					0.000125181	6.07257	2.73668	10	0.0001017	6.24414	2.67112	10
GO:0031667	BP	response to nutrient levels	111	1.54169e-06	3.12258	11.3224	29	9.86648e-06	2.90619	11.0809	27					9.57109e-06	2.77183	13.1119	30	3.85946e-05	2.62631	12.6607	28					8.91895e-05	2.45491	14.0025	29	6.19782e-05	2.51244	13.7224	29					3.14477e-05	2.58441	13.9404	30	5.27733e-05	2.53797	13.6016	29
GO:0009686	BP	gibberellin biosynthetic process	288	0.000248439	1.79454	30.9219	51	0.000513164	1.75038	30.2754	49					4.31863e-06	1.99233	35.6032	63	0.000299309	1.74481	34.4067	55	3.14284e-05	7.01712	1.19657	8	2.09542e-06	2.00524	37.946	67	0.000212872	1.74156	37.2071	59	9.25409e-07	11.5884	0.738935	8	0.000320177	1.71049	37.7907	59	0.000535642	1.68397	36.8922	57
GO:1902531	BP	regulation of intracellular signal transduction	357													3.45778e-05	1.76631	44.1332	71	3.83971e-05	1.77234	42.6499	69					4.74352e-05	1.72908	47.0372	74	4.44694e-05	1.73867	46.1213	73					0.000127426	1.67808	46.8447	72	0.000182561	1.66543	45.7309	70
GO:0046593	MF	mandelonitrile lyase activity	42													8.09395e-05	3.9725	5.15915	15	5.42642e-05	4.13124	4.98473	15					0.000166927	3.69431	5.49625	15	0.000134067	3.77734	5.3911	15					0.000159228	3.71211	5.47337	15	0.000120842	3.81704	5.34224	15
GO:0065009	BP	regulation of molecular function	2888	1.51249e-06	1.31054	310.078	389	3.32422e-06	1.30175	303.594	379					1.37837e-06	1.29284	357.021	441	1.05154e-05	1.26803	345.022	420					1.51365e-05	1.25151	380.514	457	2.40909e-05	1.24677	373.104	447					6.35128e-05	1.23035	378.956	449	0.000160499	1.21781	369.947	435
GO:0034007	MF	S-linalool synthase activity	11													0.000911545	8.57449	1.35121	6	0.000756234	8.91678	1.30552	6																	9.46974e-06	17.8113	1.4335	8	0.000110852	12.0172	1.39916	7
GO:0006526	BP	arginine biosynthetic process	51	0.000209234	3.4691	5.47576	15	0.000165441	3.55226	5.36126	15					0.000291491	3.24499	6.30474	16	0.000196135	3.37399	6.09285	16					0.000181241	3.29919	6.7196	17	0.000142208	3.37479	6.58875	17					0.000172328	3.31484	6.6921	17	0.000127977	3.40792	6.53299	17
GO:0042744	BP	hydrogen peroxide catabolic process	560	2.9437e-06	1.7296	60.126	96	1.15109e-05	1.68214	58.8687	92					2.45161e-05	1.60512	69.2285	103	0.000183498	1.53115	66.9019	96					7.52975e-05	1.54496	73.7839	106	0.000326743	1.48877	72.3471	101					4.01229e-05	1.57067	73.4818	107	9.94231e-05	1.54041	71.7348	103
GO:0017153	MF	sodium:dicarboxylate symporter activity	188	8.17307e-05	2.12956	20.0368	38	5.22173e-05	2.18061	19.6187	38					0.000172502	1.99657	23.0934	41	8.13609e-05	2.0766	22.3126	41					0.000163068	1.97428	24.6023	43	0.000105598	2.01879	24.1316	43					0.000148566	1.98383	24.4998	43	8.57889e-05	2.04008	23.9129	43
GO:0046982	MF	protein heterodimerization activity	1074	9.38047e-05	1.41197	114.465	154	4.92404e-05	1.43519	112.077	153									0.000851334	1.32559	127.467	162					0.000396717	1.33506	140.547	179	0.00029145	1.347	137.858	177					0.000598851	1.32332	139.962	177	0.000353387	1.34268	136.609	175
GO:0033674	BP	positive regulation of kinase activity	205													0.000343779	1.88618	25.3426	43	0.000163511	1.9614	24.4909	43					0.000185968	1.9111	27.0102	46	0.000117595	1.95503	26.4842	46					0.000169148	1.92019	26.8996	46	9.61751e-05	1.97429	26.2601	46
GO:0008361	BP	regulation of cell size	478	9.96218e-07	1.84107	51.7513	87	9.12069e-06	1.75367	50.6692	82					3.43125e-06	1.74444	59.0671	94	7.18905e-05	1.62434	57.081	86					5.07737e-07	1.79744	62.9556	102	6.88472e-06	1.70232	61.7291	96					1.29752e-05	1.67181	62.6978	96	0.000454202	1.52034	61.2065	87	2.38243e-05	6.30311
GO:0008752	MF	FMN reductase activity	22	3.60885e-05	6.99391	2.34473	10	3.00094e-05	7.16094	2.2958	10					0.000697991	4.94794	2.70241	9	0.000540253	5.14552	2.61105	9					0.000209941	5.53975	2.87899	10	0.000178405	5.6642	2.82391	10					0.000202699	5.56643	2.867	10	0.000165191	5.7237	2.79832	10
GO:0050878	BP	regulation of body fluid levels	48	0.000469038	2.88873	7.08627	17	0.000366432	2.958	6.9381	17																	1.62801e-06	3.77292	8.69596	24	1.14055e-06	3.85944	8.52662	24					3.75435e-07	4.04561	8.66036	25	5.32957e-05	3.7407	6.14471	17
GO:0007596	BP	blood coagulation	48																									0.00027824	3.29894	6.32433	16	0.000221365	3.37452	6.20118	16					7.30662e-05	3.63581	6.29844	17	5.37409e-05	3.73791	6.1487	17
GO:0040008	BP	regulation of growth	1361	6.33452e-05	1.3758	142.943	188	7.43331e-05	1.3754	139.824	184					5.87295e-05	1.3542	165.001	213	0.000133416	1.3392	159.272	204					1.79468e-05	1.37147	176.05	229	4.83826e-05	1.35191	172.523	222					3.45638e-06	1.40786	175.336	233	2.02299e-05	1.37348	171.014	223
GO:0005802	CC	trans-Golgi network	1989																									0.000451289	1.2405	258.335	309	0.000257702	1.25437	253.368	306					0.000360317	1.24563	257.44	309	0.000191071	1.26145	251.318	305
GO:1990482	MF	sphingolipid alpha-glucuronosyltransferase activity	6																									0.00020497	33.226	0.785179	5	0.000186531	33.972	0.770157	5					0.00020084	33.3859	0.781909	5	0.000178421	34.3287	0.763177	5
GO:0004042	MF	acetyl-CoA:L-glutamate N-acetyltransferase activity	15	0.000460668	7.34104	1.59868	7	0.000404213	7.5163	1.56532	7									0.000891923	6.5023	1.78026	7					0.000233502	7.59631	1.96295	8	0.000203568	7.76691	1.92539	8					0.000226691	7.63288	1.95477	8	0.000190796	7.84848	1.90794	8
GO:0009899	MF	ent-kaurene synthase activity	15	0.000460668	7.34104	1.59868	7	0.000404213	7.5163	1.56532	7									0.000891923	6.5023	1.78026	7					0.000233502	7.59631	1.96295	8	0.000203568	7.76691	1.92539	8
GO:0008284	BP	positive regulation of cell proliferation	501	0.000342916	1.5624	53.7913	79	0.000291988	1.57595	52.6665	78					0.000685553	1.49483	61.9348	87	0.000571988	1.51129	59.8533	85					6.20596e-05	1.5885	66.0102	97	7.85405e-05	1.58346	64.7248	95					0.000342364	1.5145	65.74	93	0.000371938	1.51606	64.177	91
GO:0016210	MF	naringenin-chalcone synthase activity	44																									0.000301003	3.43941	5.75798	15	0.000242986	3.51672	5.64782	15					0.000995056	3.11766	5.734	14	0.000780521	3.20578	5.59663	14
GO:2000024	BP	regulation of leaf development	215	9.21002e-06	2.20809	23.0841	45	5.34826e-06	2.26123	22.6014	45					0.000135655	1.93466	26.5788	46	0.000246319	1.90133	25.6855	44					3.84369e-05	2.00243	28.3277	50	4.76631e-05	1.99516	27.7761	49					0.000274433	1.85676	28.2118	47	0.000157053	1.90907	27.541	47
GO:0015081	MF	sodium ion transmembrane transporter activity	415													0.000132016	1.69094	44.3843	69	0.000145619	1.69607	42.8798	67					0.000100251	1.68678	47.2868	73	0.000279468	1.63649	46.3797	70					1.55704e-05	1.78362	47.0947	76	2.24889e-05	1.77334	45.9636	74
GO:0052716	MF	hydroquinone:oxygen oxidoreductase activity	49	2.88439e-05	4.07116	5.22235	16	2.21898e-05	4.16846	5.11338	16					4.24042e-05	3.79929	6.01901	17	0.000106881	3.60553	5.81552	16					0.000335716	3.22416	6.41229	16	0.000268695	3.29664	6.28962	16					9.01091e-05	3.55021	6.38559	17	0.000241767	3.33129	6.23261	16
GO:0052747	MF	sinapyl alcohol dehydrogenase activity	49	0.000117071	3.70388	5.22235	15	9.21458e-05	3.7924	5.11338	15					0.000558917	3.15426	6.01901	15	0.000385872	3.2803	5.81552	15					0.000335716	3.22416	6.41229	16	0.000268695	3.29664	6.28962	16					9.01091e-05	3.55021	6.38559	17	6.62784e-05	3.65059	6.23261	17
GO:0009715	BP	chalcone biosynthetic process	44																									0.000324483	3.41249	5.79731	15	0.000261079	3.49066	5.68441	15									0.000837996	3.17985	5.63631	14
GO:0031930	BP	mitochondria-nucleus signaling pathway	35	3.72692e-05	4.91961	3.75787	13	2.9766e-05	5.0375	3.6793	13					0.000161802	4.19394	4.32678	13	0.000113933	4.36061	4.18137	13					0.00030811	3.8981	4.61149	13	0.000252927	3.98738	4.52169	13					0.000295714	3.91658	4.59261	13	0.000232157	4.02652	4.48342	13
GO:0043565	MF	sequence-specific DNA binding	2288	0.000158971	1.26627	243.852	298	0.000227635	1.26139	238.764	291					0.000140221	1.2523	281.051	339	0.00026525	1.2437	271.549	326					1.12426e-05	1.2891	299.415	369	2.30753e-05	1.2795	293.687	360					1.33088e-05	1.28685	298.168	367	1.0711e-05	1.2935	291.025	360
GO:0044237	BP	cellular metabolic process	39320																	0.000112421	1.1407	1297.24	1401									0.000825961	1.1146	1411.23	1503
GO:0001135	MF	RNA polymerase II transcription regulator recruiting activity	123	1.32593e-06	2.95643	13.1092	32	2.55294e-06	2.90031	12.8356	31					0.000851675	2.1084	15.1089	28	0.00049417	2.19278	14.5981	28					8.8452e-05	2.34032	16.0962	32	6.10035e-05	2.39302	15.7882	32					8.16676e-05	2.35162	16.0291	32	5.11099e-05	2.41822	15.6451	32
GO:0033984	MF	indole-3-glycerol-phosphate lyase activity	19	0.000423339	6.10219	2.02499	8	0.000366146	6.24789	1.98274	8					0.00018313	6.43265	2.3339	9	0.000140033	6.68952	2.255	9					0.000298782	5.98246	2.4864	9	0.000257475	6.11684	2.43883	9					4.20501e-05	7.42228	2.47605	10	0.000239991	6.18108	2.41673	9
GO:0015148	MF	D-xylose transmembrane transporter activity	40	0.000168359	4.04161	4.26314	13	0.000135967	4.13817	4.17419	13					0.000178167	3.84987	4.91348	14	0.000123012	4.00369	4.74736	14					0.000348288	3.5803	5.23453	14	0.000284313	3.66076	5.13438	14					8.38209e-05	4.00921	5.21273	15	6.32088e-05	4.12255	5.08785	15
GO:0015591	MF	D-ribose transmembrane transporter activity	40	0.000168359	4.04161	4.26314	13	0.000135967	4.13817	4.17419	13					0.000178167	3.84987	4.91348	14	0.000123012	4.00369	4.74736	14					0.000348288	3.5803	5.23453	14	0.000284313	3.66076	5.13438	14					8.38209e-05	4.00921	5.21273	15	6.32088e-05	4.12255	5.08785	15
GO:0015575	MF	mannitol transmembrane transporter activity	40	0.000168359	4.04161	4.26314	13	0.000135967	4.13817	4.17419	13					0.000178167	3.84987	4.91348	14	0.000123012	4.00369	4.74736	14					0.000348288	3.5803	5.23453	14	0.000284313	3.66076	5.13438	14					8.38209e-05	4.00921	5.21273	15	6.32088e-05	4.12255	5.08785	15
GO:0015576	MF	sorbitol transmembrane transporter activity	40	0.000168359	4.04161	4.26314	13	0.000135967	4.13817	4.17419	13					0.000178167	3.84987	4.91348	14	0.000123012	4.00369	4.74736	14					0.000348288	3.5803	5.23453	14	0.000284313	3.66076	5.13438	14					8.38209e-05	4.00921	5.21273	15	6.32088e-05	4.12255	5.08785	15
GO:0010413	BP	glucuronoxylan metabolic process	850	3.82402e-05	1.49618	91.2626	129	3.47076e-05	1.50419	89.3543	127					8.34981e-05	1.44132	105.079	143	0.000120979	1.43589	101.547	138					0.000338214	1.38419	111.993	147	0.000409295	1.38102	109.813	144
GO:0003854	MF	3-beta-hydroxy-delta5-steroid dehydrogenase activity	158	0.000121116	2.2186	16.8394	33	0.00018732	2.18508	16.488	32					0.000362425	2.0363	19.4082	35	0.000406474	2.04048	18.7521	34					0.000570303	1.96371	20.6764	36	0.000395996	2.00795	20.2808	36					0.000252538	2.04503	20.5903	37	0.000332635	2.0291	20.097	36
GO:0016102	BP	diterpenoid biosynthetic process	12	7.81113e-05	11.6853	1.28489	7	6.81505e-05	11.9633	1.25818	7					0.00019322	9.96913	1.47866	7	0.000155894	10.3564	1.42999	7					0.000290215	9.26649	1.57598	7	0.000257308	9.47021	1.54647	7					0.0002843	9.30111	1.57088	7	0.000244003	9.56118	1.53364	7
GO:0008374	MF	O-acyltransferase activity	319	8.55383e-09	2.09326	46.6347	87	6.8555e-09	2.11285	45.6604	86					8.46406e-08	1.93772	53.7458	93	3.43399e-08	1.98769	51.939	92					2.97926e-06	1.88732	45.0794	76	9.62692e-05	1.74804	40.8507	65					4.73534e-08	1.93608	57.0238	98	5.7647e-08	1.93829	55.6687	96
GO:0004957	MF	prostaglandin E receptor activity	9													0.000206581	14.2913	1.10553	6	0.000170054	14.8618	1.06816	6					0.000295167	13.2914	1.17777	6	0.000264756	13.5899	1.15524	6					0.000288319	13.3554	1.17286	6	0.000251515	13.7326	1.14477	6
GO:0009685	BP	gibberellin metabolic process	9	9.47401e-05	16.6916	0.963665	6	8.4045e-05	17.0886	0.943638	6					0.000210261	14.2404	1.10899	6	0.000174005	14.7935	1.0725	6					0.000301162	13.2368	1.18198	6	0.000270768	13.5278	1.15985	6					1.85645e-05	23.2539	1.17816	7	1.57895e-05	23.9042	1.15023	7
GO:0002540	BP	leukotriene production involved in inflammatory response	9	9.62328e-05	16.6403	0.96631	6	8.53073e-05	17.0387	0.946105	6					0.000214158	14.1876	1.1126	6	0.000176513	14.751	1.07521	6					0.000306689	13.1876	1.18581	6	0.000274566	13.4894	1.16272	6					0.000299695	13.25	1.18096	6	0.000261733	13.6217	1.15288	6
GO:0042218	BP	1-aminocyclopropane-1-carboxylate biosynthetic process	9													0.000214158	14.1876	1.1126	6	0.000176513	14.751	1.07521	6					0.000306689	13.1876	1.18581	6	0.000274566	13.4894	1.16272	6					0.000299695	13.25	1.18096	6	0.000261733	13.6217	1.15288	6
GO:0002532	BP	production of molecular mediator involved in inflammatory response	9	9.62328e-05	16.6403	0.96631	6	8.53073e-05	17.0387	0.946105	6					0.000214158	14.1876	1.1126	6	0.000176513	14.751	1.07521	6					0.000306689	13.1876	1.18581	6	0.000274566	13.4894	1.16272	6					0.000299695	13.25	1.18096	6	0.000261733	13.6217	1.15288	6
GO:0052865	BP	1-deoxy-D-xylulose 5-phosphate biosynthetic process	9	9.62328e-05	16.6403	0.96631	6	8.53073e-05	17.0387	0.946105	6					0.000214158	14.1876	1.1126	6	0.000176513	14.751	1.07521	6					0.000306689	13.1876	1.18581	6	0.000274566	13.4894	1.16272	6					0.000299695	13.25	1.18096	6	0.000261733	13.6217	1.15288	6
GO:0045121	CC	membrane raft	4	0.000126219		0.424054	4	0.000116356		0.415517	4					0.00022033		0.487413	4	0.000192173		0.471036	4					0.000284407		0.519527	4	0.000263154		0.509539	4					0.000280484		0.517727	4	0.000254737		0.505415	4
GO:0098589	CC	membrane region	4	0.000126219		0.424054	4	0.000116356		0.415517	4					0.00022033		0.487413	4	0.000192173		0.471036	4					0.000284407		0.519527	4	0.000263154		0.509539	4					0.000280484		0.517727	4	0.000254737		0.505415	4
GO:0005901	CC	caveola	4	0.000126219		0.424054	4	0.000116356		0.415517	4					0.00022033		0.487413	4	0.000192173		0.471036	4					0.000284407		0.519527	4	0.000263154		0.509539	4					0.000280484		0.517727	4	0.000254737		0.505415	4
GO:0072507	BP	divalent inorganic cation homeostasis	330	0.000220409	1.74158	35.4314	57	0.000127278	1.78357	34.6905	57					0.000299513	1.67776	40.7954	63	0.000116505	1.74483	39.4243	63									0.000335106	1.65815	42.6331	65					0.000174407	1.69185	43.3018	67	8.59588e-05	1.73962	42.2723	67
GO:0018580	MF	nitronate monooxygenase activity	4													0.000227532		0.491348	4	0.000198282		0.474736	4					0.000293099		0.523453	4	0.000271302		0.513438	4					0.000288247		0.521273	4	0.000261597		0.508785	4
GO:0016002	MF	sulfite reductase activity	4													0.000227532		0.491348	4	0.000198282		0.474736	4					0.000293099		0.523453	4	0.000271302		0.513438	4					0.000288247		0.521273	4	0.000261597		0.508785	4
GO:0050311	MF	sulfite reductase (ferredoxin) activity	4													0.000227532		0.491348	4	0.000198282		0.474736	4					0.000293099		0.523453	4	0.000271302		0.513438	4					0.000288247		0.521273	4	0.000261597		0.508785	4
GO:0045552	MF	dihydrokaempferol 4-reductase activity	70	7.82908e-06	3.60015	7.4605	21	2.08122e-05	3.43997	7.30483	20					0.00020704	2.86081	8.59859	20	0.000129407	2.9752	8.30788	20					0.000480807	2.66037	9.16042	20	0.000372964	2.72019	8.98517	20									0.000922014	2.55982	8.90373	19
GO:0010324	BP	membrane invagination	4	0.000132794		0.429471	4	0.000122029		0.420491	4					0.00023341		0.494489	4	0.000203573		0.47787	4					0.000301192		0.527028	4	0.000278404		0.516765	4					0.00029629		0.52487	4	0.000269097		0.512391	4
GO:0080169	BP	cellular response to boron-containing substance deprivation	4	0.000132794		0.429471	4	0.000122029		0.420491	4					0.00023341		0.494489	4	0.000203573		0.47787	4					0.000301192		0.527028	4	0.000278404		0.516765	4					0.00029629		0.52487	4	0.000269097		0.512391	4
GO:0045792	BP	negative regulation of cell size	4													0.00023341		0.494489	4	0.000203573		0.47787	4					0.000301192		0.527028	4	0.000278404		0.516765	4					0.00029629		0.52487	4	0.000269097		0.512391	4
GO:0009814	BP	defense response. incompatible interaction	540	0.000959476	1.52101	50.5157	73									0.000495739	1.51917	58.6134	84	0.000912592	1.49774	56.3804	80					0.000107176	1.57346	62.5906	92	0.000316874	1.53029	61.175	88					0.000953847	1.47289	62.4979	87
GO:0048316	BP	seed development	3472	0.000184515	1.21599	360.822	425	0.000165983	1.21996	352.92	417					8.25472e-05	1.21475	416.816	489	0.000115374	1.21299	402.477	472					8.54274e-05	1.20836	444.08	518	0.000176087	1.19935	435.341	505					0.000764187	1.17456	442.877	505
GO:0071669	BP	plant-type cell wall organization or biogenesis	3152					0.000965244	1.19486	331.347	385					3.96291e-05	1.23337	389.658	463	0.000213204	1.21027	376.562	441					0.000103373	1.21272	415.298	486	0.000363523	1.19451	407.211	471					1.23381e-05	1.24391	413.598	494	2.12396e-05	1.23881	403.764	481
GO:0010243	BP	response to organonitrogen compound	429	0.000939255	1.59023	40.6299	61									3.48568e-05	1.72615	47.0815	75	5.64302e-05	1.71439	45.3302	72					0.000294991	1.59747	50.3951	75	0.000254433	1.61113	49.308	74					1.0218e-05	1.76282	50.2389	81	7.02167e-05	1.6792	48.9304	76
GO:0070482	BP	response to oxygen levels	451	0.000337096	1.59984	48.029	72	0.000181427	1.63866	47.0194	72					2.25652e-05	1.6905	55.3729	86	3.39567e-05	1.68232	53.5122	83					0.000210738	1.56986	59.0349	86	0.000178095	1.58281	57.8868	85					6.8227e-05	1.62343	58.7908	88	4.86066e-05	1.64543	57.3986	87
GO:0010304	BP	PSII associated light-harvesting complex II catabolic process	165	6.4161e-05	2.24424	17.7157	35	0.000220092	2.13336	17.3453	33					1.96884e-05	2.27454	20.3977	40	4.9018e-05	2.21095	19.7122	38					1.63866e-05	2.25599	21.7399	42	0.000118389	2.09114	21.3165	39					0.000164509	2.0539	21.6509	39	0.000442553	1.9716	21.1361	37
GO:0005217	MF	intracellular ligand-gated ion channel activity	92	0.000215017	2.63956	9.80522	22	0.000158875	2.70271	9.60064	22					0.000611954	2.38411	11.301	23	0.000375203	2.47947	10.9189	23					0.000241161	2.48237	12.0394	25	0.000178049	2.53822	11.8091	25					0.000573232	2.35905	11.9893	24	0.000401578	2.4258	11.702	24
GO:0010262	BP	somatic embryogenesis	32	6.63544e-05	4.99478	3.43577	12	5.38658e-05	5.11446	3.36393	12					0.000259222	4.2581	3.95592	12	0.000187165	4.4273	3.82296	12					0.000471539	3.95777	4.21622	12	0.000392537	4.04841	4.13412	12					0.000453886	3.97653	4.19896	12	0.000362501	4.08814	4.09913	12
GO:0001666	BP	response to hypoxia	433	0.000279047	1.62418	46.106	70	0.000150742	1.66358	45.1369	70					2.53914e-05	1.70153	53.1559	83	4.02493e-05	1.69046	51.3697	80					0.000224422	1.58014	56.6713	83	0.000193998	1.59229	55.5692	82					7.18047e-05	1.63579	56.437	85	5.25811e-05	1.65707	55.1005	84
GO:0015175	MF	neutral amino acid transmembrane transporter activity	98													1.24624e-05	2.8626	12.038	28	0.000151939	2.54786	11.631	25					1.41788e-05	2.79725	12.8246	29	2.81801e-05	2.72178	12.5792	28					0.000638211	2.28909	12.7712	25
GO:0045937	BP	positive regulation of phosphate metabolic process	214													0.000873898	1.78664	26.4552	43	0.00043212	1.85789	25.5661	43					0.000511896	1.80845	28.196	46	0.000331676	1.85002	27.6469	46					0.000467987	1.81705	28.0806	46	0.000274092	1.86824	27.4129	46
GO:0004049	MF	anthranilate synthase activity	20	0.000639821	5.59358	2.13157	8	0.000554547	5.72714	2.08709	8					0.000296684	5.84776	2.45674	9	0.000227788	6.08128	2.37368	9					0.000480248	5.43851	2.61726	9	0.000414873	5.56067	2.56719	9					0.000465329	5.4647	2.60636	9	0.000387143	5.61907	2.54392	9
GO:0090353	MF	polygalacturonase inhibitor activity	24
GO:0005262	MF	calcium channel activity	138	0.000113807	2.33407	14.7078	30	7.78056e-05	2.38997	14.401	30					0.000591903	2.07284	16.9515	31	0.000327348	2.15583	16.3784	31					0.000381296	2.0914	18.0591	33	0.000267771	2.1385	17.7136	33					6.86204e-05	2.27274	17.9839	35	4.16292e-05	2.33712	17.5531	35
GO:0005618	CC	cell wall	1871	4.15037e-05	1.3343	187.381	240	9.08701e-05	1.31999	183.46	233					3.35797e-05	1.31749	216.419	273					1.46671e-05	3.10564	7.21681	21	0.000232106	1.2686	231.108	282	0.000514081	1.25311	226.704	274	0.000524327	2.22778	12.2311	25	0.000672774	1.24509	230.512	277					1.26348e-07	2.86721
GO:0046872	MF	metal ion binding	11213	0.000386429	1.11964	1152.09	1252	0.000277767	1.12418	1127.36	1229					0.000433059	1.11097	1332.65	1438	0.000442472	1.11252	1286.41	1390					0.000131702	1.11855	1420.38	1539	0.000111136	1.12105	1392.94	1512					0.000158565	1.11713	1415.13	1532	7.25493e-05	1.12516	1380.92	1503
GO:0098869	BP	cellular oxidant detoxification	161	6.13314e-06	2.4882	17.2862	37	2.42678e-05	2.37129	16.9248	35					5.83473e-05	2.1955	19.9032	38	0.000312048	2.05185	19.2343	35					0.000221926	2.04023	21.2129	38	0.000649547	1.94509	20.7998	36					9.44683e-05	2.12139	21.126	39	0.000266688	2.03534	20.6238	37
GO:0005313	MF	L-glutamate transmembrane transporter activity	42																	0.000826726	3.33254	4.98473	13					0.000166927	3.69431	5.49625	15	0.000134067	3.77734	5.3911	15
GO:0015334	MF	high-affinity oligopeptide transmembrane transporter activity	116	0.00046468	2.30747	12.3631	25									1.92723e-05	2.6103	14.2491	31	0.000176499	2.36749	13.7673	28					0.000382624	2.21783	15.1801	29	0.000638901	2.16439	14.8897	28					8.74022e-06	2.65952	15.1169	33	0.000552442	2.18717	14.7548	28	3.42476e-05	14.706
GO:0046885	BP	regulation of hormone biosynthetic process	247	7.23149e-05	1.96329	26.4788	47	0.000176381	1.90541	25.9242	45					0.00095605	1.71634	30.4982	48									0.000382722	1.76391	32.5079	52	0.000438422	1.76057	31.874	51
GO:0061458	BP	reproductive system development	10423	0.000191489	1.12738	1119.09	1224	8.26196e-05	1.13671	1095.69	1206					0.000540069	1.1098	1288.52	1391	0.000620413	1.11008	1245.21	1345					0.000460937	1.10828	1373.3	1480	0.000829229	1.10352	1346.56	1447
GO:0010117	BP	photoprotection	33	9.41031e-05	4.75685	3.54314	12	7.65616e-05	4.87084	3.46905	12					7.98158e-05	4.61349	4.07954	13	0.000262268	4.21641	3.94243	12					0.000652699	3.76924	4.34798	12	0.000544742	3.85556	4.26331	12					0.000628603	3.7871	4.33018	12	0.000503609	3.8934	4.22723	12
GO:0009150	BP	purine ribonucleotide metabolic process	2725																									0.000202057	1.21766	359.038	422	0.000118327	1.2286	352.046	417
GO:0006811	BP	ion transport	4265	3.60542e-06	1.31823	270.677	342	2.21402e-05	1.29075	264.838	329	0.000384699	2.09237	17.1879	32	1.77141e-06	1.30821	313.584	392					7.40586e-05	1.86684	31.8089	54	9.57889e-05	1.21985	390.731	460									4.49718e-06	1.26499	388.476	471	6.96104e-05	1.22782	379.105	449	7.58637e-07	2.3726
GO:0042406	CC	extrinsic component of endoplasmic reticulum membrane	84	1.4527e-05	3.18645	8.90514	23	3.4231e-05	3.06739	8.72586	22					0.000357343	2.56127	10.2357	22	0.000220035	2.66294	9.89175	22					0.000859543	2.38057	10.9101	22	0.000660688	2.43433	10.7003	22
GO:0000187	BP	activation of MAPK activity	38																									0.000770606	3.43016	5.00676	13	0.000637506	3.50872	4.90927	13
GO:0006882	BP	cellular zinc ion homeostasis	134	0.000424191	2.20066	14.3873	28	0.000301083	2.2535	14.0864	28					0.000386781	2.13779	16.5654	31	0.000211736	2.22292	16.0087	31									0.00081939	2.03229	17.3116	31					4.11867e-05	2.34597	17.5832	35	2.48206e-05	2.41197	17.1651	35
GO:1901683	MF	arsenate ion transmembrane transporter activity	25													0.000438005	4.76509	3.07092	10	0.000330492	4.9554	2.9671	10					0.000730813	4.43158	3.27158	10	0.000625673	4.53113	3.20899	10					0.000706748	4.45292	3.25796	10	0.000581338	4.57873	3.1799	10
GO:0005354	MF	galactose transmembrane transporter activity	48	0.000343788	3.45647	5.11577	14	0.000276206	3.53907	5.00903	14					0.000437028	3.2499	5.89618	15	0.000300466	3.37976	5.69683	15					0.000257106	3.32497	6.28143	16	0.000205254	3.39971	6.16126	16					0.000244934	3.34099	6.25528	16	0.000184464	3.43545	6.10542	16
GO:0052694	MF	jasmonoyl-isoleucine-12-hydroxylase activity	10																									0.00065586	9.96841	1.30863	6	0.000589683	10.1923	1.2836	6					0.000640975	10.0164	1.30318	6	0.000560808	10.2993	1.27196	6
GO:0030148	BP	sphingolipid biosynthetic process	188													0.000786367	1.8595	23.241	39	0.000797933	1.87123	22.4599	38					0.000736963	1.84177	24.7703	41	0.000956435	1.82547	24.2879	40					8.3844e-05	2.02809	24.6689	44	0.000416725	1.90263	24.0824	41
GO:2000037	BP	regulation of stomatal complex patterning	43																									0.000859924	3.18463	5.66555	14	0.000705209	3.25758	5.55522	14
GO:0036065	BP	fucosylation	25													0.000461365	4.7305	3.09056	10	0.000348865	4.91843	2.98669	10					0.0007718	4.39691	3.29392	10	0.000659101	4.49759	3.22978	10
GO:0009801	BP	cinnamic acid ester metabolic process	10													0.000479124	10.6405	1.23622	6	0.000396451	11.0631	1.19468	6					0.000680883	9.8905	1.31757	6	0.000611051	10.1169	1.29191	6					0.000665698	9.93735	1.31218	6	0.000583093	10.2161	1.28098	6
GO:0010334	MF	sesquiterpene synthase activity	34																									0.000835584	3.62622	4.44935	12	0.000701086	3.7077	4.36423	12					0.000196867	4.13584	4.43082	13	0.000645156	3.74666	4.32467	12
GO:0019419	BP	sulfate reduction	7																									3.24415e-05	39.564	0.922299	6	2.89014e-05	40.4695	0.904338	6					6.68441e-07		0.918523	7	5.64791e-07		0.896685	7
GO:1990069	BP	stomatal opening	189													5.05071e-05	2.09345	23.3646	43	4.95568e-05	2.11155	22.5794	42					0.000214635	1.94531	24.9021	43	0.000138694	1.99001	24.4171	43					0.000196093	1.95456	24.8001	43	0.000114527	2.0096	24.2105	43
GO:0019842	MF	vitamin binding	626	0.000440015	1.4875	66.7181	94	0.000516595	1.48496	65.3261	92					0.000399072	1.4615	76.896	106	0.000172904	1.5031	74.2962	105					0.00078449	1.42105	81.9203	110	0.000392895	1.45333	80.3531	110					0.000460113	1.44394	81.5792	111	0.000280635	1.46877	79.6248	110
GO:0016411	MF	acylglycerol O-acyltransferase activity	119																									0.000600515	2.14379	15.5727	29	0.000436862	2.19205	15.2748	29
GO:0031408	BP	oxylipin biosynthetic process	245	6.11017e-05	1.97973	26.3051	47	7.5028e-05	1.97397	25.7551	46					6.4947e-05	1.91565	30.2875	52	0.000203525	1.84769	29.2696	49					2.33419e-05	1.95845	32.2805	56	0.000104328	1.86583	31.6518	53					0.000530639	1.74477	32.1483	51	0.000552899	1.74953	31.384	50
GO:0015293	MF	symporter activity	97	7.52728e-08	1.68051	91.2312	142	6.32844e-08	1.69185	89.3277	140
GO:0004413	MF	homoserine kinase activity	30													0.00055212	4.13833	3.68511	11	0.000409488	4.30362	3.56052	11
GO:0017096	MF	acetylserotonin O-methyltransferase activity	49																									0.000335716	3.22416	6.41229	16	0.000890289	2.9993	6.28962	15									0.000809109	3.03082	6.23261	15
GO:0034330	BP	cell junction organization	30	0.000797745	4.16118	3.22103	10	0.000674902	4.26087	3.15368	10																					0.000851035	3.90598	3.87574	11
GO:0044212	MF	transcription regulatory region DNA binding	1058	3.04547e-05	1.44851	112.76	155	0.000152359	1.40431	110.407	148																	0.000134485	1.36907	138.453	180	0.000136117	1.37184	135.804	177					0.000209912	1.35705	137.877	178	0.000232532	1.35785	134.574	174
GO:0050736	MF	O-malonyltransferase activity	26	0.00019841	5.24509	2.77104	10	0.000166425	5.37035	2.71322	10					2.12362e-05	6.12812	3.19376	12	0.000480141	4.64561	3.08578	10									0.000900399	4.24786	3.33735	10					3.87655e-05	5.72657	3.38827	12	0.000837553	4.29248	3.3071	10
GO:0052873	MF	FMN reductase (NADPH) activity	14	0.000270602	8.3899	1.4921	7	0.000236945	8.5902	1.46097	7																	0.000967024	6.64602	1.83208	7	0.000859205	6.79527	1.79703	7					0.000942672	6.67801	1.82446	7	0.000812535	6.86663	1.78075	7
GO:0042939	BP	tripeptide transport	137	0.00061529	2.13998	14.7094	28									4.78583e-05	2.3455	16.9363	34	0.000320985	2.1599	16.3671	31					0.000802914	2.01188	18.0507	32									2.80544e-05	2.3654	17.9768	36					7.54071e-05	12.3695
GO:0016104	BP	triterpenoid biosynthetic process	137	0.000269245	2.23728	14.7094	29																					0.000802914	2.01188	18.0507	32									0.000748516	2.02144	17.9768	32
GO:0051174	BP	regulation of phosphorus metabolic process	1194													0.000552911	1.31503	147.605	186	0.000352973	1.33291	142.644	182					0.000893016	1.2926	157.318	195	0.00060837	1.30628	154.254	193
GO:1901420	BP	negative regulation of response to alcohol	476					0.000686775	1.54754	50.0384	73					0.000788399	1.50211	58.8442	83	0.00027583	1.56231	56.8666	83					0.000963086	1.4784	62.7163	87	0.00052493	1.51254	61.495	87									0.000625003	1.50588	60.9746	86
GO:0009788	BP	negative regulation of abscisic acid-activated signaling pathway	476					0.000686775	1.54754	50.0384	73					0.000788399	1.50211	58.8442	83	0.00027583	1.56231	56.8666	83					0.000963086	1.4784	62.7163	87	0.00052493	1.51254	61.495	87									0.000625003	1.50588	60.9746	86
GO:0010328	MF	auxin influx transmembrane transporter activity	50													0.000209603	3.36495	6.14185	16	0.000491264	3.18653	5.9342	15					0.000434198	3.12928	6.54316	16	0.000348403	3.19962	6.41798	16					0.000414101	3.14436	6.51591	16
GO:0009786	BP	regulation of asymmetric cell division	22	0.000253332	5.76151	2.36209	9	0.000215511	5.89952	2.3127	9					0.000731776	4.91203	2.71969	9	0.000567495	5.10714	2.62829	9																					0.000951245	4.71602	2.81815	9
GO:0050891	BP	multicellular organismal water homeostasis	18													0.000750507	5.67573	2.2252	8	0.00059459	5.90116	2.15042	8																					0.000954648	5.44928	2.30576	8
GO:0055089	BP	fatty acid homeostasis	18	0.000284585	6.65717	1.93262	8	0.000245583	6.8166	1.89221	8					0.000750507	5.67573	2.2252	8	0.00059459	5.90116	2.15042	8																					0.000954648	5.44928	2.30576	8
GO:0080092	BP	regulation of pollen tube growth	385	0.000165602	1.69487	41.3366	65	9.06175e-05	1.73577	40.4723	65					0.000373721	1.60805	47.5946	71	0.000137234	1.6724	45.995	71					0.000847247	1.54624	50.7264	73	0.000487435	1.58189	49.7386	73					0.000285522	1.6069	50.5188	75	0.00013667	1.65231	49.3177	75
GO:0042937	MF	tripeptide transmembrane transporter activity	122													5.54898e-05	2.43795	14.9861	31	0.000429731	2.21615	14.4794	28					0.000920459	2.07453	15.9653	29									2.74253e-05	2.47997	15.8988	33					4.3596e-05	13.9506
GO:0048367	BP	shoot system development	8188	0.000224095	1.13963	879.127	973	0.000188266	1.14289	860.745	955					0.000476226	1.12318	1012.22	1106									0.000780225	1.11454	1078.83	1171
GO:1901617	BP	organic hydroxy compound biosynthetic process	3954	0.000783959	1.28101	167.102	207	7.55425e-124	2.89627	375.496	854					0.000796462	1.26368	191.818	234
GO:0050662	MF	coenzyme binding	1949																									0.000417668	1.29553	176.381	219	0.000337327	1.30365	172.954	216
GO:0005950	CC	anthranilate synthase complex	11	0.000407584	10.1268	1.16615	6	0.00036436	10.3597	1.14267	6					0.000872665	8.65339	1.34038	6	0.000724709	8.99622	1.29535	6
GO:0005507	MF	copper ion binding	1095	0.000165356	1.39063	116.703	155	0.000179675	1.39183	114.268	152					0.000322723	1.34708	134.507	173	0.000592002	1.33376	129.959	166					0.000993389	1.30399	143.295	179	0.000989092	1.30668	140.554	176					6.55712e-05	1.38248	142.698	187	0.000259789	1.34813	139.28	179
GO:0008661	MF	1-deoxy-D-xylulose-5-phosphate synthase activity	11	0.000419679	10.0668	1.17236	6	0.000373647	10.3071	1.1479	6					0.000911545	8.57449	1.35121	6	0.000756234	8.91678	1.30552	6
GO:0018108	BP	peptidyl-tyrosine phosphorylation	99
GO:0006595	BP	polyamine metabolic process	111	0.000594823	2.30854	11.868	24									0.000836974	2.18399	13.6565	26									7.07313e-05	2.45909	14.5548	30	0.00012575	2.40087	14.2754	29					0.000909647	2.14297	14.498	27
GO:0007154	BP	cell communication	13491	1.12061e-212	2.50427	1209.85	2208	2.17597e-214	2.53248	1182.62	2176					8.99292e-296	2.57239	1763.97	3130	8.95727e-302	2.6268	1704.68	3067					3.60E-311	2.57469	1880.04	3318	6.59E-316	2.6096	1843.43	3282					3.13123e-306	2.55999	1872.34	3296	1.28E-310	2.59739	1827.83	3249
GO:0008152	BP	metabolic process	27644	1.5652e-11	1.23869	2690.57	2899	2.47539e-12	1.25275	2623.72	2838					4.14303e-15	1.2646	3112.38	3372									1.15242e-14	1.25065	3337.77	3601									6.03356e-11	1.20709	3342.51	3565	5.37667e-11	1.21057	3249.63	3470
GO:0036094	MF	small molecule binding	1589
GO:0015318	MF	inorganic molecular entity transmembrane transporter activity	3041	9.10913e-05	1.27491	248.202	305	0.000855205	1.23047	242.981	290									0.00059548	1.22654	272.991	324	0.000449283	2.1763	12.6292	26	0.000328036	1.2287	301.134	357					0.000240318	2.69439	7.61336	19					0.000619332	1.2189	292.695	345
GO:0044273	BP	sulfur compound catabolic process	160													0.00052225	1.98904	19.7796	35																					0.000375813	1.99576	20.9948	37	0.00099329	1.90945	20.4957	35
GO:0048838	BP	release of seed from dormancy	33																									0.00015451	4.28806	4.34798	13
GO:0052552	BP	modulation by organism of immune response of other organism involved in symbiotic interaction	33																									0.000652699	3.76924	4.34798	12
GO:0052556	BP	positive regulation by symbiont of host immune response	33																									0.000652699	3.76924	4.34798	12
GO:0052572	BP	response to host immune response	33																									0.000652699	3.76924	4.34798	12
GO:0008652	BP	cellular amino acid biosynthetic process	2251																									0.000330491	1.23045	296.585	352									0.000308751	1.23218	295.371	351	0.000999085	1.21072	288.348	338
GO:0016746	MF	transferase activity. transferring acyl groups	1646	4.59718e-05	1.34493	175.428	226	4.45693e-05	1.34897	171.768	222					4.30147e-05	1.32513	202.19	256	0.000116832	1.30794	195.354	245					0.000439143	1.26511	215.401	262	0.000820195	1.25224	211.28	255					0.000155737	1.28924	214.504	265	0.000490259	1.26577	209.365	255
GO:0016143	BP	S-glycoside metabolic process	220													0.000292183	1.87	26.6551	45
GO:0019760	BP	glucosinolate metabolic process	220													0.000292183	1.87	26.6551	45
GO:1901658	BP	glycosyl compound catabolic process	158	0.000597438	2.0507	16.839	31	0.000894051	2.0165	16.4832	30					0.000740621	1.96427	19.3875	34																					0.000523529	1.97408	20.5821	36
GO:0052033	BP	pathogen-associated molecular pattern dependent induction by symbiont of host innate immune response	21																									0.000781686	4.94623	2.7669	9
GO:0052305	BP	positive regulation by organism of innate immune response in other organism involved in symbiotic interaction	21																									0.000781686	4.94623	2.7669	9
GO:0052308	BP	pathogen-associated molecular pattern dependent modulation by organism of innate immune response in other organism involved in symbiotic interaction	21																									0.000781686	4.94623	2.7669	9
GO:0052167	BP	modulation by symbiont of host innate immune response	21																									0.000781686	4.94623	2.7669	9
GO:0052509	BP	positive regulation by symbiont of host defense response	21																									0.000781686	4.94623	2.7669	9
GO:0004953	MF	icosanoid receptor activity	39	0.000524974	3.7302	4.15656	12									0.000518967	3.57445	4.79064	13																					0.000916918	3.3402	5.08241	13
GO:0016679	MF	oxidoreductase activity. acting on diphenols and related substances as donors	166	0.000143782	2.16467	17.692	34	0.000216135	2.13483	17.3229	33					1.97235e-05	2.27305	20.3909	40	0.000239003	2.0611	19.7015	36					0.000177746	2.04412	21.7233	39	0.000519934	1.95174	21.3077	37					0.000341258	1.98543	21.6328	38
GO:0055085	BP	transmembrane transport	4673	6.6987e-05	1.19862	497.307	577	0.000167255	1.18782	486.887	561					7.49522e-05	1.18515	572.102	656					0.000178935	1.97878	21.2142	39	0.000566973	1.15359	610.151	684									5.58212e-05	1.18399	607.34	695	0.00040904	1.16006	592.943	668	0.000289024	2.11313
GO:0015299	MF	solute:proton antiporter activity	242													0.00028896	1.81777	29.7266	49																					1.16562e-05	2.01566	31.537	56	0.000186148	1.83717	30.7815	51
GO:1901615	BP	organic hydroxy compound metabolic process	4543																	1.35052e-163	2.88997	537.204	1179					1.82989e-156	2.74839	592.812	1241	1.06559e-158	2.78218	581.21	1230					3.3343e-158	2.76499	590.678	1242	4.57449e-158	2.78395	576.476	1222
GO:0032350	BP	regulation of hormone metabolic process	336																	9.33414e-06	1.8774	40.1411	68																	8.90861e-06	1.8446	44.0891	73	7.3392e-06	1.8634	43.0409	72
GO:0010375	BP	stomatal complex patterning	72																																					9.06829e-05	2.9179	9.44766	22	6.30788e-05	2.99988	9.22305	22
GO:0051973	BP	positive regulation of telomerase activity	14													0.000681885	7.09418	1.73071	7	0.000552013	7.37592	1.67255	7									0.000893893	6.745	1.80868	7					0.000125563	8.83487	1.83705	8	0.000105515	9.08274	1.79337	8
GO:0033587	BP	shikimate biosynthetic process	11													0.000943583	8.5123	1.35985	6	0.000783806	8.85031	1.31414	6					0.000139354	11.5402	1.44933	7	0.000122656	11.8043	1.4211	7					0.000135695	11.5949	1.44339	7	0.000116065	11.9201	1.40908	7
GO:0009961	BP	response to 1-aminocyclopropane-1-carboxylic acid	75	0.000808913	2.62939	8.05258	18	0.000630314	2.69244	7.88421	18					0.000216998	2.76125	9.27168	21	0.000134047	2.87109	8.96007	21																	0.000176324	2.75259	9.84132	22	0.00012385	2.82993	9.60734	22
GO:0001561	BP	fatty acid alpha-oxidation	4																																					0.00029629		0.52487	4	0.000269097		0.512391	4
GO:0046323	BP	glucose import	146	0.000159579	2.24635	15.6757	31	0.000108751	2.30031	15.3479	31																					0.00087367	1.97207	18.8619	33					0.000553417	2.01375	19.1578	34	0.00035624	2.07041	18.7023	34
GO:0060284	BP	regulation of cell development	395	0.000343325	1.64324	42.4103	65	0.000192295	1.6829	41.5235	65					0.000781402	1.55816	48.8308	71	0.000299754	1.62051	47.1897	71																	0.000621425	1.55642	51.8309	75	0.000307489	1.60041	50.5987	75
GO:0006561	BP	proline biosynthetic process	53					0.000897796	3.05984	5.57151	14																													0.000917902	2.86642	6.95453	16
GO:0060919	BP	auxin influx	53													0.000473634	3.06948	6.55199	16									0.000959965	2.85289	6.98312	16	0.000773751	2.91826	6.84713	16					0.000917902	2.86642	6.95453	16
GO:0019752	BP	carboxylic acid metabolic process	10557																									1.35206e-06	1.57647	100.304	147
GO:0072503	BP	cellular divalent inorganic cation homeostasis	257																									2.50508e-05	1.92657	33.8615	58
GO:0005975	BP	carbohydrate metabolic process	8202																									0.000423917	1.12093	1080.67	1178	0.000999362	1.1127	1059.63	1149
GO:0032787	BP	monocarboxylic acid metabolic process	7769																									0.000433829	1.16116	578.15	652
GO:0010015	BP	root morphogenesis	3431	0.000327362	1.20454	367.148	429	0.000377525	1.20404	359.417	420																	0.000492008	1.18033	450.89	516	0.000551502	1.18003	442.054	506
GO:0009064	BP	glutamine family amino acid metabolic process	329																									0.000523499	1.62698	43.348	65	0.000307371	1.66446	42.5039	65
GO:0009888	BP	tissue development	3166	0.000608731	1.20253	336.696	393	0.000670194	1.20265	329.678	385																	0.000556817	1.18648	413.202	475
GO:2000652	BP	regulation of secondary cell wall biogenesis	108																	0.000816877	2.22375	12.9025	25					0.000663425	2.20016	14.2298	27	0.000487457	2.25063	13.9527	27
GO:0010160	BP	formation of animal organ boundary	47																									0.000720836	3.09241	6.19258	15	0.000584525	3.16325	6.07199	15
GO:0010483	BP	pollen tube reception	77																									0.000759957	2.47458	10.1453	21	0.000585521	2.5313	9.94772	21
GO:0030187	BP	melatonin biosynthetic process	52																									0.000762443	2.93219	6.85136	16
GO:0016311	BP	dephosphorylation	1502																									0.00086742	1.2601	197.899	240	0.000495363	1.2766	194.045	238
GO:0032879	BP	regulation of localization	2077	2.68337e-15	1.65161	223.003	339	3.24166e-15	1.6557	218.34	333					5.38353e-14	1.57718	256.764	373
GO:0080181	BP	lateral root branching	7													0.00048757	17.7327	0.865357	5					0.000356299	96.5456	0.0290833	2
GO:0043269	BP	regulation of ion transport	638	0.000107136	1.5447	67.3671	98	0.000458717	1.48747	65.9165	93					0.000590122	1.44207	77.719	106
GO:0015695	BP	organic cation transport	81													0.000674578	2.48488	10.0134	21
GO:1903826	BP	arginine transmembrane transport	22													0.000731776	4.91203	2.71969	9	0.000567495	5.10714	2.62829	9
GO:0045492	BP	xylan biosynthetic process	912	0.000530498	1.38895	97.9194	130	0.000472981	1.39687	95.8719	128					0.000923674	1.34611	112.744	145
GO:0015795	BP	sorbitol transport	11	0.000437073	9.98386	1.18105	6	0.000389068	10.2229	1.15635	6					0.000943583	8.5123	1.35985	6	0.000783806	8.85031	1.31414	6
GO:0015797	BP	mannitol transport	11	0.000437073	9.98386	1.18105	6	0.000389068	10.2229	1.15635	6					0.000943583	8.5123	1.35985	6	0.000783806	8.85031	1.31414	6
GO:0015752	BP	D-ribose transmembrane transport	11	0.000437073	9.98386	1.18105	6	0.000389068	10.2229	1.15635	6					0.000943583	8.5123	1.35985	6	0.000783806	8.85031	1.31414	6
GO:0015753	BP	D-xylose transmembrane transport	11	0.000437073	9.98386	1.18105	6	0.000389068	10.2229	1.15635	6					0.000943583	8.5123	1.35985	6	0.000783806	8.85031	1.31414	6
GO:0023051	BP	regulation of signaling	2498	5.30087e-69	2.56138	268.205	567	7.26234e-72	2.62113	262.597	566
GO:0010646	BP	regulation of cell communication	2507	2.02046e-68	2.54911	269.171	567	2.81957e-71	2.60858	263.543	566
GO:0010508	BP	positive regulation of autophagy	62	0.000209346	3.14571	6.6568	17	0.000162094	3.22114	6.51761	17									0.000734159	2.78811	7.40699	17
GO:0042127	BP	regulation of cell proliferation	473	0.000222486	1.60402	50.6099	76	0.000115667	1.64295	49.5471	76
GO:0050810	BP	regulation of steroid biosynthetic process	86	0.000240561	2.69081	9.23363	21	0.000502456	2.584	9.04056	20
GO:0010422	BP	regulation of brassinosteroid biosynthetic process	86	0.000240561	2.69081	9.23363	21	0.000502456	2.584	9.04056	20
GO:0043470	BP	regulation of carbohydrate catabolic process	7	0.00024821	20.7979	0.751574	5	0.000224232	21.2958	0.735859	5
GO:0098754	BP	detoxification	276	0.000267516	1.82173	28.6707	48
GO:0046283	BP	anthocyanin-containing compound metabolic process	210	0.000382731	1.92597	22.2866	39	0.000249915	1.97255	21.8174	39
GO:0071215	BP	cellular response to abscisic acid stimulus	3315	0.000564454	2.02308	17.4583	32	0.00079853	1.99768	17.0523	31
GO:0043086	BP	negative regulation of catalytic activity	841	0.000567439	1.40381	90.2963	121
GO:0019370	BP	leukotriene biosynthetic process	12	0.000794632	8.31974	1.28841	6	0.000708819	8.51895	1.26147	6
GO:0010272	BP	response to silver ion	30	0.000797745	4.16118	3.22103	10	0.000674902	4.26087	3.15368	10
GO:0045087	BP	innate immune response	3236					6.929e-83	2.67557	287.03	630																																	8.63848e-87	2.55774	355.345	736
GO:0018958	BP	phenol-containing compound metabolic process	2252					3.27416e-21	3.89401	28.5269	86
GO:0042537	BP	benzene-containing compound metabolic process	2220
GO:0015849	BP	organic acid transport	1894
GO:0050801	BP	ion homeostasis	2778																																													0.000485952	2.453
GO:0065007	BP	biological regulation	32318
GO:0044706	BP	multi-multicellular organism process	3011
GO:0015711	BP	organic anion transport	2231																																													0.000697183	2.57901
GO:0052545	BP	callose localization	1442
GO:0042886	BP	amide transport	6561
GO:0032412	BP	regulation of ion transmembrane transporter activity	773
GO:0052547	BP	regulation of peptidase activity	168
GO:0045861	BP	negative regulation of proteolysis	174
GO:1901698	BP	response to nitrogen compound	2999					0	6.05074	279.217	1029
GO:0042592	BP	homeostatic process	6406																																	0.000431991	2.08075	16.4362	31
GO:0023056	BP	positive regulation of signaling	766
GO:0051346	BP	negative regulation of hydrolase activity	184
GO:1903959	BP	regulation of anion transmembrane transport	860
GO:0010647	BP	positive regulation of cell communication	778
GO:0000003	BP	reproduction	14020
GO:0019748	BP	secondary metabolic process	3316
GO:0014070	BP	response to organic cyclic compound	1825
GO:0006525	BP	arginine metabolic process	85
GO:0009699	BP	phenylpropanoid biosynthetic process	1399
GO:0009790	BP	embryo development	3313
GO:0009965	BP	leaf morphogenesis	1771
GO:1901605	BP	alpha-amino acid metabolic process	2883
GO:0010183	BP	pollen tube guidance	169
GO:0034762	BP	regulation of transmembrane transport	1175
GO:0034637	BP	cellular carbohydrate biosynthetic process	2970
GO:0009311	BP	oligosaccharide metabolic process	1071																					7.45654e-07	4.30603	4.44975	18
GO:0006935	BP	chemotaxis	178
GO:0009423	BP	chorismate biosynthetic process	31
GO:0019725	BP	cellular homeostasis	2353
GO:0048532	BP	anatomical structure arrangement	1859
GO:0009735	BP	response to cytokinin	1717									8.50262e-06	4.23159	3.85471	15									1.97128e-08	3.95489	7.13372	26									1.13397e-07	4.75538	4.40539	19									2.84701e-08	4.50809
GO:0010270	BP	photosystem II oxygen evolving complex assembly	15									0.000515789	69.2601	0.0336754	2									3.11177e-05	60.5488	0.0623214	3									7.38538e-06	98.8555	0.0384862	3									1.32506e-05	81.0071
GO:0030104	BP	water homeostasis	184																					1.33919e-05	9.69268	0.764476	7
GO:0015672	BP	monovalent inorganic cation transport	1652																					2.39194e-05	3.08356	6.86367	20																					0.000563834	3.08944
GO:0009269	BP	response to desiccation	254
GO:0042425	BP	choline biosynthetic process	11									0.000271775	100.048	0.0246953	2									1.14244e-05	90.8285	0.0457024	3									2.69855e-06	148.292	0.0282232	3
GO:0098739	BP	import across plasma membrane	59
GO:0000023	BP	maltose metabolic process	589																					2.35179e-07	6.0857	2.44715	14									0.000877685	4.82793	1.51123	7
GO:0010155	BP	regulation of proton transport	273																					0.000161019	6.44122	1.13425	7									0.000735234	7.43563	0.700449	5
GO:0034220	BP	ion transmembrane transport	3391
GO:0009807	BP	lignan biosynthetic process	65									0.000437626	21.912	0.145927	3																					0.000645214	19.1193	0.166774	3									5.37133e-05	21.3336
GO:0090358	BP	positive regulation of tryptophan metabolic process	14
GO:0010218	BP	response to far red light	629									9.66356e-05	5.98425	1.41212	8									2.95214e-06	5.25231	2.61334	13									4.04811e-05	5.89337	1.61386	9									0.000879559	4.23751
GO:0015793	BP	glycerol transport	73									2.35676e-05	26.4243	0.163887	4																					0.000905015	16.9323	0.1873	3
GO:0010114	BP	response to red light	853									0.000735002	4.38337	1.91501	8									7.04415e-05	3.83895	3.54401	13									2.48301e-06	5.87967	2.18858	12
GO:0098712	BP	L-glutamate import across plasma membrane	18
GO:0090354	BP	regulation of auxin metabolic process	82																					0.00039554	12.4524	0.34069	4
GO:0033240	BP	positive regulation of cellular amine metabolic process	20
GO:0015694	BP	mercury ion transport	21
GO:0010033	BP	response to organic substance	2490					9.46443e-37	2.20474	199.577	385													0.000106419	1.62652	67.9387	96
GO:0098542	BP	defense response to other organism	1917					1.78528e-34	2.27027	169.44	336																																	4.34268e-41	2.28696	210.221	410
GO:0019438	BP	aromatic compound biosynthetic process	16558					8.37301e-07	1.14932	1693.79	1858
GO:1901362	BP	organic cyclic compound biosynthetic process	16474					4.17684e-06	1.13945	1676.3	1828
GO:0009713	BP	catechol-containing compound biosynthetic process	121					0.000307117	2.3346	12.7199	26
GO:0006722	BP	triterpenoid metabolic process	143					0.000402364	2.17021	15.0326	29
GO:0019745	BP	pentacyclic triterpenoid biosynthetic process	128					0.000759477	2.17413	13.4557	26
GO:0006730	BP	one-carbon metabolic process	142					0.000797246	2.09509	14.9274	28
GO:0016192	BP	vesicle-mediated transport	3312					0.000975645	1.18992	348.167	403
GO:1900426	BP	positive regulation of defense response to bacterium	84					0.000982881	2.49226	8.83031	19
GO:0006720	BP	isoprenoid metabolic process	2306																					5.01931e-06	2.90728	9.58088	26									0.000322466	2.88777	5.91661	16
GO:0019252	BP	starch biosynthetic process	770																					5.33724e-06	4.6163	3.19917	14
GO:0008610	BP	lipid biosynthetic process	4947																					1.96271e-05	2.17165	20.5536	41									0.000393654	2.23664	12.6928	26
GO:0009830	BP	cell wall modification involved in abscission	91																					4.15116e-05	14.1663	0.378083	5									9.40371e-05	18.266	0.233483	4
GO:0032260	BP	response to jasmonic acid stimulus involved in jasmonic acid and ethylene-dependent systemic resistance	48																					4.91565e-05	22.0857	0.199429	4									0.000263791	26.3487	0.123156	3									1.6091e-05	29.5835
GO:0052576	BP	carbohydrate storage	3																					5.14632e-05	482.756	0.0124643	2																					2.9002e-05	645.104
GO:0098655	BP	cation transmembrane transport	1939																					7.36588e-05	2.75353	8.05608	21																					4.35791e-05	3.17728
GO:0016101	BP	diterpenoid metabolic process	333																					8.67021e-05	6.04152	1.38354	8									2.71741e-06	9.97729	0.854394	8
GO:0071482	BP	cellular response to light stimulus	552																					0.000121796	4.54673	2.29343	10
GO:0006869	BP	lipid transport	781																					0.000123521	3.8607	3.24487	12																					0.000851595	3.84488
GO:0005978	BP	glycogen biosynthetic process	66																					0.000171696	15.6696	0.274214	4
GO:0071332	BP	cellular response to fructose stimulus	6																					0.0002552	120.684	0.0249286	2
GO:0009638	BP	phototropism	74																					0.000267065	13.8772	0.307452	4
GO:0009637	BP	response to blue light	635																					0.00033437	3.99209	2.60405	10
GO:0071322	BP	cellular response to carbohydrate stimulus	629																					0.000344063	3.97662	2.61334	10
GO:0006656	BP	phosphatidylcholine biosynthetic process	33																					0.000353042	24.2131	0.137107	3									8.55992e-05	39.5318	0.0846697	3
GO:0043085	BP	positive regulation of catalytic activity	893																					0.000414768	3.36431	3.7102	12
GO:0009653	BP	anatomical structure morphogenesis	10066																					0.000497088	1.65419	41.8218	63
GO:0006568	BP	tryptophan metabolic process	661																					0.000505445	3.77936	2.7463	10
GO:0015843	BP	methylammonium transport	9																					0.000607449	68.9591	0.0373929	2
GO:0006098	BP	pentose-phosphate shunt	808																					0.000643565	3.40077	3.35705	11
GO:0016114	BP	terpenoid biosynthetic process	1223																					0.000688818	2.86727	5.08127	14									8.48517e-05	4.06088	3.13791	12
GO:0019288	BP	isopentenyl diphosphate biosynthetic process. methylerythritol 4-phosphate pathway	954																					0.000737943	3.1436	3.96364	12
GO:0006644	BP	phospholipid metabolic process	2019																					0.000892737	2.36825	8.38846	19
GO:0098660	BP	inorganic ion transmembrane transport	1569																					0.000994904	2.55682	6.51882	16									0.000797345	3.14221	4.02566	12
GO:0030639	BP	polyketide biosynthetic process	19																	0.000919795	5.3646	2.26988	8
GO:0006812	BP	cation transport	4996																																	4.14137e-06	2.73237	12.8185	31
GO:0009826	BP	unidimensional cell growth	3619																																	2.01686e-05	2.84716	9.28544	24
GO:0032989	BP	cellular component morphogenesis	5121																																	4.77078e-05	2.45351	13.1392	29
GO:0009309	BP	amine biosynthetic process	403																																	9.00832e-05	7.11506	1.034	7
GO:0016053	BP	organic acid biosynthetic process	7080																																	0.00053456	2.00979	18.1655	33
GO:0048589	BP	developmental growth	5638																																	0.000567911	2.11818	14.4657	28
GO:0071805	BP	potassium ion transmembrane transport	418																																	0.000783823	5.82593	1.07248	6
GO:0006813	BP	potassium ion transport	754																																	0.000793259	4.3198	1.93457	8
GO:0009825	BP	multidimensional cell growth	592																																	0.000903843	4.80296	1.51892	7
GO:0001505	BP	regulation of neurotransmitter levels	435																																	0.000962159	5.59367	1.1161	6
GO:0002240	BP	response to molecule of oomycetes origin	18																																	0.000974782	49.1408	0.0461835	2
GO:0015757	BP	galactose transmembrane transport	14																													0.000893893	6.745	1.80868	7
GO:0090449	BP	phloem glucosinolate loading	93																																													1.17235e-05	18.5662
GO:0090408	BP	phloem nitrate loading	93																																													1.17235e-05	18.5662
GO:0043201	BP	response to leucine	93																																													1.17235e-05	18.5662
GO:0080052	BP	response to histidine	93																																													1.17235e-05	18.5662
GO:0080053	BP	response to phenylalanine	93																																													1.17235e-05	18.5662
GO:0015850	BP	organic hydroxy compound transport	248																																													0.000139606	8.12222
GO:0010233	BP	phloem transport	157																																													0.000143069	10.7388
GO:0055076	BP	transition metal ion homeostasis	1107																																													0.000211814	3.65045
GO:0042938	BP	dipeptide transport	174																																													0.000230657	9.65615
GO:0015698	BP	inorganic anion transport	2239																																													0.000258686	2.73571
GO:0042128	BP	nitrate assimilation	188																																													0.000329318	8.9156
GO:0090066	BP	regulation of anatomical structure size	1171																																													0.000350927	3.4456
GO:0072348	BP	sulfur compound transport	201																																													0.000446832	8.32267
GO:0010351	BP	lithium ion transport	206																																													0.000499553	8.11505
GO:2001057	BP	reactive nitrogen species metabolic process	215																																													0.000606077	7.76623
GO:0006879	BP	cellular iron ion homeostasis	609																																													0.000714843	4.37982
GO:0010154	BP	fruit development	5813																																									4.72928e-26	1.4908	742.547	1009
GO:0046873	MF	metal ion transmembrane transporter activity	1282	2.99621e-06	1.46159	136.634	189	2.61064e-05	1.41237	133.783	180
GO:0015172	MF	acidic amino acid transmembrane transporter activity	66	1.08144e-05	3.65201	7.03418	20	7.88718e-06	3.73934	6.88741	20					2.52328e-05	3.33829	8.10724	21																					6.10796e-05	3.11934	8.601	21	4.26251e-05	3.20758	8.39495	21
GO:0004190	MF	aspartic-type endopeptidase activity	268	0.000239114	1.8345	28.563	48	0.000146248	1.87854	27.9671	48																	0.000445868	1.71941	35.0713	55	0.00087307	1.67809	34.4004	53
GO:0015077	MF	monovalent inorganic cation transmembrane transporter activity	1635	0.000249498	1.30574	174.256	219	0.000972316	1.27291	170.62	210
GO:0016702	MF	oxidoreductase activity. acting on single donors with incorporation of molecular oxygen. incorporation of two atoms of oxygen	166	0.000303751	2.09064	17.6486	33	0.000951774	1.9807	17.2793	31					0.00044346	1.98664	20.3467	36	0.000984897	1.92152	19.6569	34					7.88301e-05	2.11862	21.6774	40	0.00024115	2.02547	21.2615	38					7.18709e-05	2.12888	21.5869	40	9.2866e-05	2.11755	21.0683	39
GO:0003993	MF	acid phosphatase activity	180	0.000331064	2.0284	19.1841	35	0.000222312	2.07701	18.7839	35
GO:0016229	MF	steroid dehydrogenase activity	205	0.000507966	1.91224	21.8486	38	0.000675926	1.89491	21.3927	37
GO:0047787	MF	delta4-3-oxosteroid 5beta-reductase activity	8	0.00058244	13.9802	0.852628	5	0.00052733	14.3139	0.834838	5					7.69135e-05	21.4373	0.982696	6	6.30657e-05	22.2931	0.949472	6
GO:0004955	MF	prostaglandin receptor activity	12	0.000763563	8.38888	1.27894	6	0.000681205	8.58912	1.25226	6
GO:0048037	MF	cofactor binding	2706	0.0009137	1.21409	277.307	327									0.000341196	1.21951	320.395	378	0.000692498	1.20925	309.582	363																	0.000906863	1.19542	340.801	395	0.000619779	1.20488	332.427	388
GO:0015370	MF	solute:sodium symporter activity	219	0.000936762	1.82389	23.3043	39	0.000626851	1.8677	22.8171	39
GO:0003841	MF	1-acylglycerol-3-phosphate O-acyltransferase activity	21	0.000937404	5.16322	2.23815	8	0.000814174	5.2865	2.19145	8					0.000462712	5.36036	2.57958	9	0.000356702	5.57441	2.49236	9																	0.000720439	5.00922	2.73668	9	0.000601226	5.15073	2.67112	9
GO:0004888	MF	transmembrane signaling receptor activity	2593
GO:0016773	MF	phosphotransferase activity. alcohol group as acceptor	5887
GO:0016301	MF	kinase activity	6767
GO:0060089	MF	molecular transducer activity	3025
GO:0140096	MF	catalytic activity. acting on a protein	11789
GO:0004107	MF	chorismate synthase activity	6
GO:0042392	MF	sphingosine-1-phosphate phosphatase activity	9
GO:0050307	MF	sucrose-phosphate phosphatase activity	10
GO:0003824	MF	catalytic activity	13403
GO:0015291	MF	secondary active transmembrane transporter activity	1511													6.50194e-06	1.50978	108.212	153	5.88233e-06	1.52043	104.577	149					5.29188e-05	1.43567	115.336	156	4.36004e-05	1.44515	113.137	154					3.60145e-06	1.51294	114.783	162	1.19597e-05	1.48484	112.057	156
GO:0009940	MF	amino-terminal vacuolar sorting propeptide binding	21
GO:0003942	MF	N-acetyl-gamma-glutamyl-phosphate reductase activity	6
GO:0008792	MF	arginine decarboxylase activity	6
GO:0010333	MF	terpene synthase activity	101													2.59763e-06	3.02455	12.4065	30	0.000349407	2.55873	10.2002	22																	7.70051e-05	3.05489	8.72286	21	0.000170727	2.92739	8.51456	20
GO:0015075	MF	ion transmembrane transporter activity	1829													4.24167e-06	1.35344	222.925	287																					3.35655e-06	1.3485	236.622	303
GO:0010329	MF	auxin efflux transmembrane transporter activity	91													7.24702e-05	2.71	11.1782	25	0.000117041	2.66492	10.8002	24					0.000200282	2.52002	11.9085	25	0.000147484	2.57673	11.6807	25
GO:0016627	MF	oxidoreductase activity. acting on the CH-CH group of donors	506													0.000202771	1.55084	62.1555	90	0.000981851	1.48314	60.0541	84
GO:0005345	MF	purine nucleobase transmembrane transporter activity	73													0.000381792	2.69874	8.9671	20	0.000241686	2.80665	8.66393	20
GO:0022890	MF	inorganic cation transmembrane transporter activity	1417													0.00080148	1.27948	172.989	213																					0.000315152	1.29645	183.541	228					6.0512e-05	2.99098
GO:0015295	MF	solute:proton symporter activity	494													0.000857665	1.48903	60.6815	85
GO:0016838	MF	carbon-oxygen lyase activity. acting on phosphates	116																									6.50613e-05	2.42857	15.1727	31	4.49876e-05	2.48328	14.8823	31
GO:0016706	MF	oxidoreductase activity. acting on paired donors. with incorporation or reduction of molecular oxygen. 2-oxoglutarate as one donor. and incorporation of one atom each of oxygen into both donors	358																									0.000219142	1.64822	46.849	71	0.000592362	1.59694	45.9527	68					0.000543696	1.598	46.6539	69	0.000762086	1.58441	45.5362	67
GO:0004024	MF	alcohol dehydrogenase activity. zinc-dependent	23																									0.000327942	5.11353	3.00985	10	0.000279375	5.2284	2.95227	10
GO:0015181	MF	arginine transmembrane transporter activity	32																	0.000771977	3.89362	3.79789	11					0.000442582	3.98898	4.18762	12	0.000369491	4.07861	4.10751	12
GO:0015189	MF	L-lysine transmembrane transporter activity	32																	0.000771977	3.89362	3.79789	11					0.000442582	3.98898	4.18762	12	0.000369491	4.07861	4.10751	12
GO:0047763	MF	caffeate O-methyltransferase activity	52																									0.0007071	2.95533	6.80488	16
GO:0015926	MF	glucosidase activity	353																																					0.000601987	1.59687	46.0023	68
GO:0008171	MF	O-methyltransferase activity	151																																					0.000922618	1.94294	19.6781	34
GO:0030551	MF	cyclic nucleotide binding	81									1.13749e-06	30.4957	0.180125	5									1.21575e-06	19.5786	0.336392	6									2.03658e-06	26.9765	0.202789	5									2.30337e-07	26.2586
GO:0022838	MF	substrate-specific channel activity	719																					0.000242757	3.83619	2.98599	11									0.000496046	4.65503	1.80007	8									0.000477136	4.18254
GO:0022803	MF	passive transmembrane transporter activity	758																					0.000378414	3.63379	3.14796	11									0.000698911	4.4104	1.89771	8									0.000693791	3.96245
GO:0004185	MF	serine-type carboxypeptidase activity	189																					1.45506e-06	10.8787	0.784914	8									0.000121832	11.1247	0.473175	5									2.66597e-11	20.757
GO:0052667	MF	phosphomethylethanolamine N-methyltransferase activity	8									0.000136346	151.557	0.0177901	2									3.908e-06	145.411	0.0332239	3									8.55415e-07	243.334	0.0200286	3
GO:0005267	MF	potassium channel activity	375									2.31152e-05	8.90112	0.83391	7
GO:0022843	MF	voltage-gated cation channel activity	240									0.000212784	9.83926	0.533702	5																					0.000367296	8.7038	0.600857	5									0.000117243	8.39644
GO:0005242	MF	inward rectifier potassium channel activity	53									0.000232736	27.4468	0.117859	3																					0.000329392	24.3172	0.132689	3									0.000626438	19.4185
GO:0000234	MF	phosphoethanolamine N-methyltransferase activity	11									0.00026665	101.034	0.0244614	2									1.14086e-05	90.8777	0.0456828	3									2.50651e-06	152.077	0.0275393	3
GO:0015254	MF	glycerol channel activity	59									9.72281e-06	33.4926	0.131202	4																					0.000452102	21.7099	0.147711	3									0.000857446	17.3364
GO:0051993	MF	abscisic acid glucose ester beta-glucosidase activity	13																																													0.000739765	58.5974
GO:0070300	MF	phosphatidic acid binding	64									0.000406586	22.4937	0.142321	3									0.000152076	16.2017	0.265791	4
GO:0019137	MF	thioglucosidase activity	14																																													0.000861284	53.7135
GO:0016798	MF	hydrolase activity. acting on glycosyl bonds	1581																					0.000130376	2.88161	6.56587	18																					0.000499354	2.98368
GO:0015186	MF	L-glutamine transmembrane transporter activity	18
GO:0015097	MF	mercury ion transmembrane transporter activity	21
GO:0016314	MF	phosphatidylinositol-3.4.5-trisphosphate 3-phosphatase activity	21
GO:0015250	MF	water channel activity	94									6.13275e-05	20.4571	0.209033	4
GO:0015166	MF	polyol transmembrane transporter activity	119									0.000152963	16.004	0.264627	4
GO:0005216	MF	ion channel activity	625									0.000533228	5.28068	1.38985	7
GO:0015267	MF	channel activity	699									0.000878724	4.8414	1.51455	7
GO:0046910	MF	pectinesterase inhibitor activity	191									0.000914586	9.83157	0.424738	4
GO:0080066	MF	3-methylthiopropyl-desulfoglucosinolate sulfotransferase activity	31																					8.38726e-06	36.0213	0.128742	4									6.58126e-05	43.4378	0.0776107	3									2.71992e-06	48.1937
GO:0080067	MF	4-methylthiobutyl-desulfoglucosinolate sulfotransferase activity	31																					8.38726e-06	36.0213	0.128742	4									6.58126e-05	43.4378	0.0776107	3									2.71992e-06	48.1937
GO:0080068	MF	5-methylthiopentyl-desulfoglucosinolate sulfotransferase activity	31																					8.38726e-06	36.0213	0.128742	4									6.58126e-05	43.4378	0.0776107	3									2.71992e-06	48.1937
GO:0080069	MF	7-methylthioheptyl-desulfoglucosinolate sulfotransferase activity	31																					8.38726e-06	36.0213	0.128742	4									6.58126e-05	43.4378	0.0776107	3									2.71992e-06	48.1937
GO:0080070	MF	8-methylthiooctyl-desulfoglucosinolate sulfotransferase activity	31																					8.38726e-06	36.0213	0.128742	4									6.58126e-05	43.4378	0.0776107	3									2.71992e-06	48.1937
GO:0080071	MF	indol-3-yl-methyl-desulfoglucosinolate sulfotransferase activity	31																					8.38726e-06	36.0213	0.128742	4									6.58126e-05	43.4378	0.0776107	3									2.71992e-06	48.1937
GO:1990135	MF	flavonoid sulfotransferase activity	31																					8.38726e-06	36.0213	0.128742	4									6.58126e-05	43.4378	0.0776107	3									2.71992e-06	48.1937
GO:0004564	MF	beta-fructofuranosidase activity	93																					4.59713e-05	13.8524	0.386227	5																					0.000216946	14.6072
GO:0031219	MF	levanase activity	60																					0.000118245	17.36	0.249179	4																					0.000900508	17.032
GO:0103075	MF	indole-3-pyruvate monooxygenase activity	5																					0.000170451	160.995	0.0207649	2
GO:0080118	MF	brassinosteroid sulfotransferase activity	26																					0.000171662	31.6026	0.107978	3																					7.39799e-05	42.2309
GO:0080131	MF	hydroxyjasmonate sulfotransferase activity	27																					0.000192528	30.2854	0.112131	3																					1.532e-06	56.5786
GO:0005249	MF	voltage-gated potassium channel activity	221																					0.000348837	6.81557	0.917809	6
GO:0080041	MF	ADP-ribose pyrophosphohydrolase activity	7																					0.000355983	96.5943	0.0290709	2
GO:0015079	MF	potassium ion transmembrane transporter activity	529																					0.000415137	4.25408	2.19693	9									0.000403911	5.52943	1.32439	7
GO:0008238	MF	exopeptidase activity	454																					0.00068723	4.39756	1.88545	8																					2.37715e-07	8.30754
GO:0005261	MF	cation channel activity	454																					0.00068723	4.39756	1.88545	8
GO:0051670	MF	inulinase activity	42																					0.000721648	18.633	0.174425	3
GO:0016782	MF	transferase activity. transferring sulfur-containing groups	176																					0.000888966	7.11994	0.730925	5																					2.10169e-05	11.5684
GO:0090439	MF	tetraketide alpha-pyrone synthase activity	19																	0.000879961	5.40491	2.255	8
GO:0004954	MF	prostanoid receptor activity	15																	0.000891923	6.5023	1.78026	7
GO:0008236	MF	serine-type peptidase activity	890																																													5.46522e-06	4.97689
GO:0090448	MF	glucosinolate:proton symporter activity	93																																													1.17617e-05	18.5559
GO:0080054	MF	low-affinity nitrate transmembrane transporter activity	123																																													4.53287e-05	13.8322
GO:0016752	MF	sinapoyltransferase activity	41																																													0.000293026	25.5551
GO:0008233	MF	peptidase activity	2771																																													0.000473928	2.45895
GO:1901618	MF	organic hydroxy compound transmembrane transporter activity	218																																													0.000647098	7.65213
GO:0015078	MF	proton transmembrane transporter activity	944																																													0.000847537	3.53833
GO:0030312	CC	external encapsulating structure	4937																	8.9588e-72	2.03854	581.376	1003																					5.83213e-68	1.97067	623.809	1044
GO:0031224	CC	intrinsic component of membrane	568
GO:0090406	CC	pollen tube	810
GO:0043190	CC	ATP-binding cassette (ABC) transporter complex	25
GO:0042995	CC	cell projection	1062
GO:0005773	CC	vacuole	5398																																													7.26707e-09	3.00816
GO:0012511	CC	monolayer-surrounded lipid storage body	28	0.000384384	4.68992	2.96838	10																					0.000448653	4.33895	3.63669	11
GO:0042807	CC	central vacuole	24									2.0467e-07	96.0993	0.051221	4									0.000128945	35.1126	0.0982607	3									2.97976e-05	58.06	0.0599321	3									5.54721e-05	46.9207
GO:0009654	CC	photosystem II oxygen evolving complex	85
GO:0044421	CC	extracellular region part	480									0.000613506	6.12775	1.02442	6									0.000184452	4.76832	1.96521	9
GO:0009521	CC	photosystem	326									0.000710697	7.50406	0.695752	5
GO:0043674	CC	columella	21									0.000925045	49.8817	0.0448184	2
GO:0009501	CC	amyloplast	69																					0.000192869	15.1701	0.282499	4
GO:0030931	CC	heterotetrameric ADPG pyrophosphorylase complex	8																					0.000460143	81.6548	0.0327536	2
GO:0009523	CC	photosystem II	260																					0.000759659	5.8492	1.06449	6
GO:0080085	CC	signal recognition particle. chloroplast targeting	11																					0.00089654	54.4341	0.0450362	2
GO:0000145	CC	exocyst	142																													0.000861545	1.99643	18.0886	32									0.000750271	2.01516	17.9422	32
GO:0005764	CC	lysosome	181																																													0.000260062	9.3997
aGSEA for genes that are Fusarium responsive an each genotpye, bGSEA for genes that are Fusarium responsive across all genotypes
[truncated: 22 more columns]
