# Supplementary material for: Fusarium head blight resistance in European winter wheat: insights from genome-wide transcriptome analysis
Source: BMC Genomics. 2021 Jun 24;22:470. doi: 10.1186/s12864-021-07800-1 (PMC8228913; doi:10.1186/s12864-021-07800-1)
Supplement: Supplementary file 5 — Additional file 5. [file 12864_2021_7800_MOESM5_ESM.xlsx]

## Sheet: Article
Online Resource 5
Article title:	Fusarium head blight resistance in European winter wheat: Insights from genome-wide transcriptome analysis
Journal:	BMC Genomics
Authors:	Maria Buerstmayr, Christian Wagner, Tetyana Nosenko, Jimmy Omony, Barbara Steiner, Thomas Nussbaumer, Klaus F.X. Mayer, Hermann Buerstmayr
Name, affiliation, and email of corresponding author:	Maria Buerstmayr, Department of Agrobiotechnology Tulln, BOKU-University of Natural Resources and Life Sciences-Vienna, Konrad Lorenz Str. 20, 3430 Tulln, Austria e-mail: maria.buerstmayr@boku.ac.at
Content:	Table 5 Genes differentially expressed between resistance groups
	Table S5.1 Genes differentially expressed between resistance groups after Fg treatment
	Table S5.2 Genes differentially expressed between resistance groups after Mock treatment

## Sheet: TableS5.1
Table S5.1 Genes differentially expressed between resistance groups after Fg treatment
group						Sumai3|nonSumai3		Sumai3|Resistant		Sumai3|Moderate Resistant		Sumai3|Susceptible		Resistant|Moderate resistant		Resistent|Susceptible		Moderate resitant|Susceptible
GENE	Human readable gene description	Chrom	bp pos Start	baseMean		log2FC	padj	log2FC	padj	log2FC	padj	log2FC	padj	log2FC	padj	log2FC	padj	log2FC	padj
TraesCS2B01G216900	CsAtPR5	2B	203902727	15.5061		28.1885	8.5e-25	9.01251	0.00775932	8.95712	0.000965451	8.98419	0.00520248
TraesCS5B01G014800	Terpene synthase	5B	13919352	214.999		14.7335	7.42e-24	14.4854	1.05392e-09	14.8413	2.98248e-13	13.8597	4.26122e-09
TraesCSU01G091600	Maturase K	Un	81476659	16.6672		9.49237	0.00107527					24.6353	1.18993e-11			22.9781	6.14665e-14	22.5494	1.48389e-19
TraesCS4B01G085000	3-deoxy-manno-octulosonate cytidylyltransferase	4B	85361945	13.5295		9.11776	1.21e-06	26.3805	1.01357e-23	13.2731	5.58622e-08	26.3545	9.5856e-24	-13.1074	4.97577e-11			13.0814	8.41179e-11
TraesCS6B01G242200	tRNA/tmRNA (uracil-C(5))-methyltransferase	6B	426826775	11.1116		8.35532	3.09e-09	8.54733	3.58139e-06	8.44385	5.77937e-08	8.35871	4.43549e-06
TraesCS5A01G332600LC	Serine protease HTRA1	5A	425004681	6.10687		8.15446	2.6e-10	8.42052	0.000157048	8.36513	5.89286e-06	8.3922	0.000109148
TraesCS6B01G654100LC	Metastasis-associated protein MTA1	6B	632230841	8.57019		8.11505	0.00474121	7.99853	0.0142849	8.02329	0.00202458	8.05036	0.00908749
TraesCS5A01G176600LC	SPOC domain / Transcription elongation factor S-II protein	5A	193888982	4.97533		7.89529	4.71e-13	7.92721	0.000133871	7.87181	4.71411e-06	7.89888	9.36058e-05
TraesCS3B01G005000	receptor kinase 1	3B	3016080	4.59077		7.81123	3.24e-14	8.03083	0.000245924	7.9594	1.06102e-05	7.92235	0.000200415
TraesCS5A01G154600LC	Stress-associated endoplasmic reticulum protein 2	5A	155211668	9.35998		7.79267	3.86e-32	6.45791	2.09092e-08	8.35309	7.3509e-18	8.52527	6.31609e-14
TraesCS4B01G395200	FKBP-type peptidyl-prolyl cis-trans isomerase family protein	4B	669472683	7.65236		7.77907	1.3e-29	8.7091	1.94002e-12	8.46007	8.05015e-16	7.54239	1.25289e-09
TraesCS6B01G126100LC	DNA helicase	6B	70037772	6.59615		7.76312	6.25e-05	7.82789	0.00391335	7.7244	0.000409886	7.87971	0.00229683
TraesCS2B01G217000	rRNA N-glycosidase	2B	204776776	6.66892		7.73971	0.012534	7.78652	0.0222832	7.73113	0.0043445	7.7582	0.0160721
TraesCS5A01G210700	Serine protease HTRA1	5A	426269096	18.7119		7.52498	1.85e-06	12.3329	9.33457e-10	8.81933	8.24579e-07					-8.21629	2.456e-05
TraesCSU01G042000	disease resistance protein (TIR-NBS-LRR class)	Un	34214519	3.69587		7.49259	5.56e-18	7.62588	2.84325e-05	7.44224	1.0466e-06	7.59756	2.0607e-05
TraesCS5A01G210600	Serine protease HtrA-like	5A	426264130	11.9161		7.47441	0.000107846	26.2935	6.73727e-32	13.0579	3.36978e-10			-13.2356	2.244e-15	-22.4241	9.32917e-34	-9.18848	6.96288e-07
TraesCS5A01G210500	Serine protease HtrA-like	5A	425453904	24.8378		7.42489	1.03e-22	9.36573	1.32236e-19	8.64947	8.84139e-23	4.07238	0.000125217			-5.29335	1.24909e-07	-4.57709	7.35218e-09
TraesCS2B01G217100	CsAtPR5	2B	204916026	5.64855		7.39923	0.0172868	7.56833	0.026398	7.51294	0.00554745	7.54001	0.0192701
TraesCS6B01G463800LC	D-arabinono-1,4-lactone oxidase family protein	6B	428248555	5.00248		7.3204	2.25e-05	7.30963	0.000715533	7.31836	3.30869e-05	7.36146	0.000409403
TraesCS7B01G576400LC	Cleavage stimulation factor subunit 3	7B	601135067	7.28541		7.29146	8.2e-15	7.28224	7.95074e-07	7.1008	1.08643e-08	7.25021	6.10162e-07
TraesCS5A01G211300LC	stress response NST1-like protein	5A	257282460	3.23168		7.26646	9.99e-12	7.39624	9.48623e-05	7.30878	3.34917e-06	7.36791	6.74072e-05
TraesCS1B01G736800LC	Disease resistance protein (NBS-LRR class) family	1B	660913464	4.85258		7.08555	0.000495532	7.21762	0.00480414	7.17826	0.000476577	7.26945	0.00284015
TraesCS6B01G238800LC	Histone-lysine N-methyltransferase	6B	159541756	4.2765		6.90858	3.67e-10	6.7696	8.56881e-06	6.8745	5.80525e-08	6.74235	6.48997e-06
TraesCS7A01G363700	Transposon protein, putative, Mutator sub-class	7A	538355715	5.96722		6.8994	1.08e-07	6.35079	0.0317423			8.51306	0.00139878
TraesCS1B01G754000LC	hAT transposon superfamily	1B	669245478	3.82758		6.63127	2.64e-16	6.61957	5.88145e-08	6.57934	1.24794e-10	6.67034	3.03049e-08
TraesCS5A01G314000LC	D-alanine-D-alanine ligase family	5A	402120641	2.34866		6.61233	4.24e-13	6.51351	9.78401e-05	6.52223	2.31656e-06	6.48518	7.0237e-05
TraesCS5A01G314100LC	Translation initiation factor IF-2	5A	402122617	1.88099		6.44025	3.03e-07	6.65581	0.0020889	6.56835	0.000169858	6.54734	0.00159928
TraesCSU01G135900	ATP binding protein, putative	Un	121123132	18.9668		6.38765	0	6.42076	1.79626e-57	6.30154	1.21129e-78	6.68186	1.69846e-59
TraesCS7B01G339000	Glutamate dehydrogenase	7B	593342210	3.01511		6.34105	3.35e-05	6.45602	0.00219897	6.4968	0.000129291	6.4277	0.00144964
TraesCS3B01G228000LC	TPX2 (targeting protein for Xklp2) protein family	3B	168698478	1.61714		6.33063	9.52e-05	6.36659	0.0424505	6.31119	0.0110221	6.33827	0.0324243
TraesCS5A01G164800	chlorophyll A/B-binding protein 2	5A	353597941	6.99714		6.29697	0.000228198	7.60154	0.00100423	7.49806	6.86024e-05
TraesCS6B01G462700LC	NAC domain containing protein 16	6B	425606614	2.16324		6.25536	0.00392916	6.29806	0.018009	6.24266	0.00317696	6.26974	0.0128695
TraesCS2B01G429700	Type IV secretion system putative lipoprotein virB7	2B	617121638	2.31152		6.19605	0.0492762			6.18995	0.0232609
TraesCS3B01G204400LC	Annexin	3B	143527704	1.42582		6.13268	4.72e-07	6.23982	0.00790598	6.24854	0.000845321	6.29165	0.0047217
TraesCS3B01G545600LC	DNA mismatch repair protein MutS	3B	571311877	17.5072		6.06631	0.022291					12.5502	0.000443446
TraesCS3B01G545500LC	Protein FAR1-RELATED SEQUENCE 5	3B	571309673	22.2311		5.99556	0.0356049					27.9477	3.39416e-16			21.8364	9.67766e-14	22.5345	1.78622e-21
TraesCS6B01G500600LC	Retrotransposon protein, putative, Ty1-copia subclass	6B	469789393	3.5081		5.9892	0.00496874	6.98084	0.0104403	5.3851	0.0170481	6.95252	0.00714094
TraesCS5A01G332800LC	DNA-directed RNA polymerase subunit beta	5A	425250252	4.97052		5.97854	0.00140213	7.71897	0.00324333	7.74372	0.000245931
TraesCS4B01G481600LC	Cyclin-D5-2	4B	580889833	1.17656		5.96377	0.0447029
TraesCS1D01G063300LC	Pectin lyase-like superfamily protein	1D	33761208	1.86476		5.92582	0.0104905	6.00862	0.0304866	5.95322	0.00682663	5.98029	0.0227469
TraesCS2B01G623800LC	Translation initiation factor IF-2	2B	583396223	2.01218		5.86668	0.0129576	5.87736	0.040176	5.87006	0.00941767	5.92919	0.0278029
TraesCS6B01G582100LC	RNA chaperone ProQ	6B	560991268	2.14618		5.85735	4.43e-05	5.91623	0.00713876	6.03716	0.00055539	6.04821	0.00367582
TraesCS5A01G333000LC	S-adenosylmethionine synthase	5A	425328572	1.80484		5.79573	5.82e-06	6.05178	0.00545125	6.15668	0.000392595
TraesCS3B01G030400LC	TSA: Wollemia nobilis Ref_Wollemi_Transcript_4460_1009 transcribed RNA sequence	3B	12034574	1.89704		5.74924	1.27e-31	5.63938	1.14716e-08	5.80199	1.20701e-12	5.45084	2.80713e-08
TraesCS3B01G545400LC	Protein FAR1-RELATED SEQUENCE 5	3B	571309266	12.0952		5.7241	0.0278753					25.9725	3.39777e-16			20.5272	5.13758e-14	20.5656	1.37897e-20
AML47767	Terpene synthase	3B	8440000	1.04031		5.70947	1.77e-06	5.94313	0.0034381	5.88773	0.000302394	5.91481	0.00229156
TraesCS3B01G030500LC	telomerase reverse transcriptase	3B	12035409	1.39235		5.7054	6.76e-09	5.89452	0.000809936	5.55053	0.000108814	5.8662	0.000550145
TraesCS1D01G202100LC	Transposon Ty3-I Gag-Pol polyprotein	1D	179138126	3.94988		5.67037	0.000192816			6.76167	2.36975e-05	6.44887	0.000720734
TraesCSU01G108800LC	DnaA initiator-associating protein	Un	56308662	1.10689		5.66587	0.0306346
TraesCS6B01G627500LC	Protein FAR1-RELATED SEQUENCE 5	6B	611447830	1.89549		5.61887	3.65e-07	6.17284	0.000914027	5.63073	0.000217743	5.50193	0.00251952
TraesCS1B01G670100LC	AT hook motif-containing protein, putative	1B	628627199	2.90931		5.47669	4.35e-06	6.29649	0.000191845	4.95756	0.000453798	5.93595	0.000334911
TraesCSU01G207200LC	Auxin-induced protein	Un	112451869	2.05307		5.46464	6.81e-08	5.8731	0.000940481	5.47722	0.000153633	5.10079	0.00340874
TraesCS5B01G062900	DNA topoisomerase 2	5B	70560030	2.79261		5.42351	2.51e-17	5.38572	6.10318e-07	5.27157	3.92353e-09	5.18936	1.1912e-06
TraesCS6B01G463700LC	Replication A 70 kDa DNA-binding subunit	6B	427758487	1.74124		5.41274	7.55e-14	5.41939	4.04107e-06	5.42859	2.36902e-08	5.25003	6.29425e-06
TraesCS6B01G242100	tRNA/tmRNA (uracil-C(5))-methyltransferase	6B	426736276	1.25202		5.32933	0.0246436			5.50579	0.0139958	5.53286	0.0389659
TraesCS3B01G030200LC	ATP-dependent DNA helicase pif1	3B	12029980	2.06376		5.32026	2.14e-52	5.08477	4.07199e-12	5.28539	5.82583e-19	5.193	8.43387e-13
TraesCS4B01G132300	Alpha-L-arabinofuranosidase 1	4B	172388854	49.6524		5.31208	1.92e-19	7.73331	2.58541e-20	4.7452	1.32308e-10	7.78633	1.45882e-20	-2.98811	4.61127e-05			3.04113	8.73927e-05
TraesCS6D01G511300LC	NBS-LRR disease resistance protein-like protein	6D	468920835	2.2353		5.28615	0.00363095			6.1551	0.000103509	6.18217	0.00103817
TraesCS3D01G631600LC	Anthocyanin 5-aromatic acyltransferase	3D	600492775	5.85009		5.26999	6.48e-77	4.86092	1.01195e-22	5.45277	1.85828e-38	5.16325	2.81027e-24
TraesCS1B01G439100	Disease resistance protein (TIR-NBS-LRR class) family	1B	660914515	4.81103		5.26977	6.5e-19	5.52978	7.08705e-09	4.94074	4.50927e-10	5.82108	6.47221e-10
TraesCS6B01G196400	Nucleotide-binding, alpha-beta plait	6B	232744484	1.82396		5.25326	1.36e-11	5.33397	3.50758e-05	5.48941	2.11498e-07	5.26736	3.02589e-05
TraesCS1B01G220600LC	Ubiquitin carboxyl-terminal hydrolase-like protein	1B	162181785	2.96145		5.23114	2.36e-05			6.56666	1.01384e-05	6.77135	0.000111119
TraesCS6D01G402500	70 kDa heat shock protein	6D	470902210	8.66133		5.21946	0.0139542			7.96764	2.41839e-05			4.23199	0.0363172
TraesCS6B01G462600LC	S-adenosyl-L-methionine-dependent methyltransferases superfamily protein	6B	425604146	1.06116		5.18769	0.0211462			5.12394	0.0185447	5.18307	0.0464681
TraesCS6B01G462900LC	Protein FAR1-RELATED SEQUENCE 5	6B	426488259	1.09592		5.16844	0.0301714			5.39483	0.0214049
TraesCSU01G135300	Disease resistance protein	Un	116836686	1.11859		5.12431	0.00591214			5.58764	0.0349216
TraesCS6B01G685000LC	Arginine--tRNA ligase	6B	650777150	6.72254		5.07307	0.0103834	5.60975	0.0137657	7.59391	1.62511e-05
TraesCS6A01G294700	Protein kinase	6A	528919762	5.82708		5.04439	0.00178707	5.0575	0.0241024	4.74902	0.0082616	5.65742	0.00680267
TraesCS7B01G057000	winged-helix DNA-binding transcription factor family protein	7B	59644292	0.852762		5.02376	0.0268557			5.38613	0.0380016
TraesCS6B01G275800LC	Double Clp-N motif-containing P-loop nucleoside triphosphate hydrolases superfamily protein	6B	201200287	1.98369		5.01038	0.00683717	5.86351	0.0220264	4.82415	0.0211174
TraesCS6B01G275600LC	Retrotransposon protein, putative, unclassified, expressed	6B	201198875	1.99135		5.00754	0.00732782	6.024	0.0141444	5.38741	0.0065328
TraesCS3B01G027700	Octicosapeptide/Phox/Bem1p (PB1) domain-containing protein / tetratricopeptide repeat (TPR)-containing protein	3B	12026503	0.777855		4.96775	2.04e-06	4.99834	0.00640402	5.1353	0.000407079	5.13032	0.00313195
TraesCS1B01G034000LC	Leucine-rich repeat (LRR) family protein	1B	16841784	5.91266		4.95054	1.14e-05	3.62083	0.0391954	7.40222	1.50424e-08	4.58184	0.00415191	3.78138	0.00470981
TraesCS1B01G178200	Zinc finger protein 346	1B	322727360	1.45295		4.94741	0.000427514			5.29703	0.00746108	5.71569	0.0144642
TraesCS3B01G261600LC	Retrovirus-related Pol polyprotein from transposon TNT 1-94	3B	202595156	1.47256		4.91249	0.00291048			5.89515	0.0051516
TraesCS7B01G039300	Retrotransposon protein, putative, Ty3-gypsy subclass	7B	38658765	2.46333		4.90916	0.035755			5.93472	0.00687042	5.99385	0.0219946
TraesCS3B01G261800LC	Retrovirus-related Pol polyprotein from transposon TNT 1-94	3B	202600825	1.61203		4.88233	0.00299065			5.59871	0.00867284
TraesCS6B01G699900LC	CWF19-like protein 2	6B	660376452	1.00076		4.87638	0.0139907	4.88799	0.0300968	4.76847	0.00754286	4.61922	0.0318993
TraesCS1B01G753900LC	DNA-directed RNA polymerase subunit beta'	1B	669244588	0.880263		4.81515	0.00127411	4.69125	0.0199339	4.44349	0.0056036	4.50263	0.0190356
TraesCS1B01G034100LC	Disease resistance protein (NBS-LRR class) family	1B	16890544	1.5271		4.80339	0.000269671			5.65721	0.00183102	4.64045	0.0386488
TraesCS7B01G093900LC	Sodium-dependent serotonin transporter	7B	60347305	0.511494		4.80323	0.0474068
TraesCS2B01G435600LC	pantothenate kinase 2	2B	386132916	0.530794		4.77467	0.0397767
TraesCS6B01G463200LC	Cysteine--tRNA ligase	6B	426743084	0.931074		4.7633	0.0051141	4.90813	0.0175718	5.02906	0.00199946	4.95995	0.0110706
TraesCS6B01G196300	Nuclear pore complex protein NUP205	6B	232743055	0.879366		4.71056	1.8e-06	4.76705	0.00267167	4.92004	9.68114e-05	4.57434	0.00271811
TraesCS2B01G598300	F-box family protein	2B	781149316	3.00226		4.70437	3.33e-10	3.9645	0.000813123	5.01687	1.18548e-07	4.31548	0.000157444
TraesCSU01G199500	Pseudo-response regulator	Un	297413757	2.12012		4.69469	0.0438744			4.77873	0.0440651
TraesCS3B01G272100LC	Transposon Ty3-I Gag-Pol polyprotein	3B	219479970	2.22549		4.68888	0.000437869			6.21231	0.000160043
TraesCSU01G012800	NBS-LRR disease resistance protein-like protein	Un	15965003	4.89827		4.66437	0.00340853	7.08674	0.000362807	3.95159	0.0231639	6.81471	0.00043146
TraesCSU01G445000LC	Chalcone-flavonone isomerase family protein	Un	325811443	0.783597		4.65775	0.00336831			5.11392	0.0287908
TraesCS3B01G181800	Protein FAR1-RELATED SEQUENCE 3	3B	190888353	4.80093		4.65417	0.0271323			7.42739	0.000905743
TraesCS5A01G433700	Acetyltransferase (GNAT) domain protein	5A	617187437	1.26651		4.6267	1.53e-06	5.44683	0.00123716	5.244	0.000119378	5.25066	0.00125812
TraesCS6B01G317400LC	F-box and associated interaction domain protein	6B	246509653	0.777263		4.61362	0.00506859	4.69603	0.0320978	4.70475	0.00637628	4.66771	0.0241813
TraesCS6B01G242400	Epidermal p-coumarate 3-hydroxylase	6B	430188434	8.33205		4.59506	1.86e-69	4.63812	1.22059e-25	4.56109	1.63779e-34	4.77267	1.13727e-26
TraesCS1B01G439200	NBS-LRR-like resistance protein	1B	660961899	5.44607		4.58949	5.28e-22	4.73364	6.31102e-10	4.44966	3.96364e-12	4.8058	2.4283e-10
TraesCS2B01G331200LC	Transposase	2B	244701420	2.81245		4.5791	0.000312473			4.95414	0.000237313	6.35381	4.55364e-05
TraesCS3B01G135100LC	ARM repeat superfamily protein	3B	74020905	1.34811		4.57271	0.00476989			5.55379	0.00340245
TraesCS7A01G773100LC	Transposon Ty3-I Gag-Pol polyprotein	7A	719489909	1.22979		4.56785	0.0057728	5.04308	0.0126914	4.08494	0.0134236	5.0949	0.00771511
TraesCS5A01G514500LC	BSD domain-containing protein	5A	567946499	0.629602		4.54685	0.00826318			4.515	0.0485506
TraesCS3B01G272200LC	Pectin lyase-like superfamily protein	3B	219482399	1.50101		4.54565	0.00173723			5.71866	0.00180214
TraesCS3B01G272000LC	Transposon Ty3-I Gag-Pol polyprotein	3B	219479004	2.26231		4.54365	1.98e-05	3.57536	0.0442527	5.93871	8.57125e-06	3.57426	0.0330968
TraesCS1B01G033700	Benzyl alcohol O-benzoyltransferase	1B	16426497	1.52982		4.5295	2.63e-14	3.34287	0.00113679	5.12114	3.06826e-10	5.35386	3.30101e-08
TraesCS2B01G075200	Receptor-like protein kinase	2B	40904243	1.52618		4.52849	2.49e-06	4.85414	0.00195464	3.95493	0.00201199	4.96393	0.000917937
TraesCSU01G012600	NBS-LRR disease resistance protein-like protein	Un	15914899	22.559		4.51324	2.37e-22	5.29056	6.90682e-15	4.05559	5.87621e-12	5.19929	1.29098e-14
AML47770	Agglutinin	3B	8500000	0.881472		4.50489	0.00103915			4.70257	0.0087178	5.01824	0.0181576
TraesCS1D01G271500LC	Cardiolipin synthase B	1D	246674647	0.766716		4.49944	0.0251384			4.41967	0.0290458
TraesCS6B01G275700LC	P-loop containing nucleoside triphosphate hydrolases superfamily protein	6B	201199788	1.10618		4.47015	0.00723729	4.88445	0.0381676	4.60464	0.0138985
TraesCS1B01G035400	Disease resistance protein (NBS-LRR class) family	1B	16839553	1.31276		4.46619	1.27e-05			5.1436	0.000156464	4.1913	0.0121986
TraesCS6B01G375100	Delta(14)-sterol reductase	6B	648681052	1.41534		4.42168	0.0233781			5.21142	0.00475599
TraesCS6B01G685200LC	CENP-C	6B	650787704	2.08681		4.40002	0.00370082	4.40692	0.0276262	5.40884	0.000420905
TraesCS1A01G018100LC	U-box domain protein	1A	7697806	0.725769		4.38808	4.72e-06	3.63714	0.0359524	4.68914	0.000349752	4.70019	0.00278499
TraesCS6D01G516300LC	Scavenger receptor class A member 5	6D	470420049	1.66247		4.3719	1.12e-07	5.02815	2.86193e-06	4.82921	5.47689e-08	3.14351	0.00425928
TraesCS5B01G454400	HAT transposon superfamily, putative	5B	627397369	1.74993		4.36554	0.000848313			5.21016	0.00167127	6.21619	0.00129668
TraesCS4B01G308900	Alanine--tRNA ligase	4B	599550194	18.8552		4.34249	9.86e-13	4.25771	2.51649e-05	2.99939	0.000598747	5.36362	3.41498e-08					2.36423	0.0468954
TraesCS3B01G459500LC	CCAAT-binding transcription factor	3B	473397277	3.29109		4.30357	9.64e-05	6.13731	2.74267e-05	5.36295	1.20543e-05					-3.29953	0.0442214
TraesCS2B01G627800	transmembrane protein, putative (DUF594)	2B	799564898	1.04652		4.29871	0.038221
TraesCS6D01G517100LC	Receptor-like protein kinase	6D	470911546	1.47809		4.29374	0.0172376			5.45649	0.000980404
TraesCS2B01G628000	transmembrane protein, putative (DUF594)	2B	799605041	1.03956		4.28895	0.0109589
TraesCS4D01G354000LC	Sentrin-specific protease	4D	422224823	0.733836		4.27413	0.0340338			4.07219	0.023007
TraesCS3B01G193500	Vesicle-associated membrane protein, putative	3B	212884092	26.6834		4.26788	3.49e-19	3.42665	4.93533e-07	5.92283	9.32451e-26	3.23704	1.738e-06	2.49618	2.38011e-06			-2.68579	2.88703e-07
TraesCS5A01G430900LC	kinesin like protein for actin based chloroplast movement 2	5A	510212982	1.12665		4.16727	0.0459394
TraesCS5A01G497600LC	Cytochrome P450	5A	558307078	1.12195		4.15406	1.18e-08	4.77432	1.62092e-05	4.16358	5.75335e-06	4.74505	1.25565e-05
TraesCS3B01G023000LC	hAT transposon superfamily	3B	9062143	25.0685		4.15259	6.49e-23	4.15075	7.47116e-09	4.27043	4.36218e-12	3.71433	2.43344e-07
TraesCS5A01G000300	Armadillo repeat-containing protein 8	5A	28170	1.49641		4.12696	6.94e-09	4.52225	0.000179476	3.97094	5.5346e-05	4.92537	2.2007e-05
TraesCS7B01G038400	3'-N-debenzoyl-2'-deoxytaxol N-benzoyltransferase	7B	37419989	2.81014		4.10467	0.0138229			4.27735	0.0195783	6.05301	0.00363629
TraesCS1B01G756500LC	HAT transposon superfamily	1B	670176054	1.59989		4.09543	0.00513976			4.50427	0.0186107	5.89864	0.00714094
TraesCS3B01G275400LC	N-(5'-phosphoribosyl)anthranilate isomerase isoform 1	3B	223204758	6.81436		4.07675	0.000197661			5.60461	3.53055e-05	3.67022	0.029315
AML47763	Oxidoreductase NAD-binding domain	3B	8360000	7.79992		4.0674	9.52e-14	3.42786	4.40528e-05	3.93228	1.61555e-08	5.16625	9.98848e-11
TraesCS1D01G114400	DNA-directed RNA polymerase	1D	110504432	4.6848		4.01256	0.00674737			7.16962	9.00721e-07	6.93508	5.73391e-05	5.18774	0.000120962	4.9532	0.0052893
TraesCS4B01G616000LC	ATP-dependent DNA helicase PIF1	4B	672025372	0.821024		4.00538	0.0342172
TraesCS5A01G685800LC	Armadillo repeat-containing protein 8	5A	675530492	1.23123		3.98472	2.97e-07	2.40039	0.0194487	4.26565	4.6211e-08	4.32231	4.39275e-06	1.86526	0.0488825
TraesCS1D01G035800	Phospholipase D	1D	16610391	0.752408		3.96393	3.28e-05			4.84579	0.000283987	4.90252	0.00212857
TraesCS3B01G804800LC	zinc finger MYM-type-like protein	3B	782346911	0.799405		3.91032	0.000563079			3.78458	0.0222439	4.46428	0.0209704
TraesCS5D01G134300LC	pumilio 1	5D	108510038	3.11434		3.90355	0.027607
TraesCS7A01G055500LC	zinc finger MYM-type-like protein	7A	20188874	0.987667		3.88925	7.06e-09	3.69043	0.00293535	3.84701	7.99693e-05	3.52496	0.00306573
TraesCS5B01G173600LC	Elongation factor G	5B	158796796	0.638461		3.88327	0.00593047			3.73529	0.0266646	4.15794	0.0366759
TraesCS5B01G308800LC	Transposable element protein, putative, Retrotrans_gag	5B	337438152	1.02701		3.85866	0.00440654			4.37188	0.0101377	4.60898	0.0226658
TraesCS5A01G433800	Lipid transfer protein	5A	617188180	1.41864		3.85135	9.99e-21	4.80094	2.65318e-11	4.47229	1.52482e-14	4.62593	8.47849e-11
TraesCS1D01G028200	Disease resistance protein (TIR-NBS-LRR class) family	1D	11177049	14.2685		3.84086	9.52e-32	2.93741	3.12936e-09	4.34388	3.30536e-25	4.4825	2.2277e-20	1.40647	0.00147166	1.54509	0.00536162
TraesCS5A01G381700	Phosphatidic acid phosphatase (PAP2) family protein	5A	579411595	1.51544		3.83468	8.62e-18	4.29096	1.04005e-07	3.91166	2.40983e-09	3.85191	1.33707e-06
TraesCSU01G422800LC	NBS-LRR disease resistance protein-like protein	Un	316685199	5.22143		3.81479	2.13e-12	4.13202	2.71753e-06	3.71921	5.72641e-07	3.40082	0.000109148
TraesCS4B01G285900	Myosin-7	4B	569592004	1.67233		3.78526	4.7e-19	4.13818	3.45812e-09	3.97801	2.33996e-12	4.19146	1.65493e-09
AML47764	Terpene synthase	3B	8380000	1.38261		3.77849	2.33e-07	3.23896	0.00217141	4.06693	8.53317e-07	3.80721	0.000150261
TraesCS7B01G052400LC	Mitochondrial transcription termination factor-like	7B	32345396	1.63745		3.76523	5.19e-23	4.15825	1.09995e-09	3.55216	5.05281e-11	3.62728	4.87888e-08
TraesCS5D01G134200LC	Protein phosphatase 2A regulatory B subunit family protein	5D	108508121	3.13054		3.75053	0.0480249
TraesCSU01G533800LC	Glycosyltransferase	Un	370635126	5.83155		3.7399	0.00028508			4.45083	0.000339429
TraesCSU01G007300LC	Disease resistance protein RPP13	Un	2470205	2.43924		3.73875	1.89e-06			4.66658	1.20068e-06	3.21096	0.00586245	2.33843	0.0264121
TraesCS6B01G353100LC	Galactose oxidase/kelch repeat superfamily protein	6B	281821921	0.621167		3.72977	0.027289
TraesCS7B01G032200	Mitochondrial transcription termination factor-like	7B	32347218	1.78496		3.71646	2.37e-26	4.26218	3.57231e-11	3.77389	8.65795e-14	3.95214	3.73598e-10
TraesCS6D01G511200LC	Lecithine-cholesterol acyltransferase-like 4	6D	468901332	1.17842		3.67714	0.00654251			4.30099	0.000939548	4.84351	0.00161442
TraesCS1A01G034700LC	Unknown protein	1A	13352273	1.32767		3.67634	0.00117671			4.13947	0.00332429	3.95807	0.0204516
TraesCS6A01G294400	Ubiquitin system component Cue protein	6A	526161156	15.3098		3.67473	0.00385591			3.66259	0.0206596	3.77701	0.0439229
TraesCS3B01G519800LC	Double-stranded RNA-binding protein 1	3B	548081647	0.904807		3.66036	1.23e-14	3.40448	7.89335e-05	3.53636	2.49043e-07	4.05602	8.41629e-07
TraesCS1A01G069100	CsAtPR5	1A	50837516	1.10681		3.63543	3.46e-16	3.54112	1.4869e-05	4.0592	7.9306e-10	3.56193	9.41764e-06
TraesCS1B01G756400LC	HAT dimerization domain-containing protein	1B	670173726	2.48426		3.62661	0.0184508			4.26521	0.0249032	6.16742	0.00414446
TraesCS1A01G048400	Ankyrin repeat protein-like	1A	30139543	2.02644		3.57621	0.000370813	3.97622	0.0177036	3.15867	0.0200034	5.29955	0.000533022
TraesCS5B01G185800	Tetratricopeptide repeat (TPR)-like superfamily protein	5B	337437171	1.68227		3.53577	0.00452611			4.14037	0.00753255	4.84964	0.00750537
TraesCS1B01G264100	MEI2-like 2 protein	1B	464915567	1.48841		3.48094	0.000998753			3.60161	0.00948245	4.99672	0.00175875
TraesCS6B01G238600LC	3-oxoacyl-[acyl-carrier-protein] reductase FabG	6B	159427427	2.55354		3.46504	7.05e-15	3.51365	1.41765e-06	3.95667	4.63513e-11	2.92645	4.37721e-05
TraesCS1D01G012700	Fatty acyl-CoA reductase	1D	6591227	4.17288		3.46358	5.47e-05	4.83832	7.19476e-05	4.61357	4.45284e-06					-2.87742	0.0294415
TraesCS1A01G038300	Inorganic pyrophosphatase family protein	1A	21024514	3.54458		3.45891	2.72e-07	2.31328	0.0378714	3.919	3.4075e-06	5.40775	5.20861e-08			3.09447	0.00492168
TraesCS1A01G048200	CsAtPR5	1A	29993437	5.70897		3.41506	7.82e-32	2.87434	6.05937e-10	3.64521	2.19483e-20	3.72703	1.21055e-15
TraesCS6A01G510200LC	Cytochrome P450 family protein	6A	557920362	1.9564		3.4104	2.43e-07	3.75531	9.35518e-05	4.08187	1.40288e-07	2.14841	0.0255731
TraesCS1B01G208100LC	Lipase	1B	148128710	11.385		3.407	1.5e-60	3.14077	6.41808e-19	3.43547	9.78034e-30	3.63001	1.24087e-24
TraesCS3A01G674500LC	Transposon protein, putative, CACTA, En/Spm sub-class, expressed	3A	724158974	1.8923		3.40686	1.7e-11	3.15336	0.000189236	3.50138	2.64953e-07	3.50072	2.31698e-05
TraesCS6B01G061100	Cytochrome P450 family protein, expressed	6B	40491633	2.41959		3.40352	7.75e-06	5.00918	6.0441e-06	3.93784	1.79248e-05	3.23785	0.00340681
TraesCS7B01G648000LC	Voltage-dependent P/Q-type calcium channel subunit alpha-1A	7B	651561723	3.30152		3.402	0.00259049			3.88555	0.00677402	3.55162	0.0411691
TraesCS3B01G003600LC	Zinc finger MYM-type protein 1	3B	2395113	2.48192		3.38809	0.000227535	3.68784	0.0206347	3.04411	0.0184988	4.12065	0.00580514
TraesCS6D01G371700	Protein kinase superfamily protein	6D	456946314	1.57788		3.35822	0.00398417	3.98097	0.0242699	3.20979	0.0248278
TraesCS3B01G230400	Metal transporter, putative	3B	344949774	15.4901		3.35685	8.22e-05	3.56614	0.00578506	3.20216	0.00239987	3.5864	0.00350191
TraesCS7A01G103800LC	H-protein	7A	42789536	1.44703		3.35437	0.0310981					5.1916	0.00923448
TraesCS1D01G042500	Ankyrin repeat protein-like	1D	20968399	7.44344		3.33715	4.98e-20	2.83631	1.03428e-06	3.58947	1.27405e-13	3.07867	5.89947e-08
TraesCS3B01G146000	Ankyrin repeat protein-like	3B	135677683	2.33045		3.32866	6.46e-36	3.60794	6.99882e-15	3.41467	8.46317e-20	3.15131	1.89223e-12
TraesCS4B01G302000LC	P-loop containing nucleoside triphosphate hydrolases superfamily protein	4B	361071590	2.02536		3.32779	0.000153068			4.88044	7.47263e-07	4.78914	4.81868e-05	3.23246	0.00078139	3.14116	0.0140858
TraesCS2B01G096100LC	Transposon protein, putative, CACTA, En/Spm sub-class, expressed	2B	46336334	18.8816		3.32672	2.1e-14	2.8102	5.51829e-05	3.50141	1.0222e-09	3.47502	1.53713e-07
TraesCS2A01G134300LC	Methylenetetrahydrofolate--tRNA-(uracil-5-)-methyltransferase TrmFO	2A	79299564	1.62959		3.29231	0.000600973			4.63624	1.80709e-05	3.13685	0.0193899	2.82347	0.0125067
TraesCS1B01G417600	Translationally-controlled tumor protein-like protein	1B	642042173	4.46513		3.27565	3.26e-15	3.82129	6.59203e-09	3.01686	6.00033e-08	3.78466	6.40029e-09
TraesCS7B01G038000	Retrotransposon protein, putative, Ty3-gypsy subclass	7B	36991040	1.01189		3.27023	0.000357829			3.36107	0.00239501	3.7697	0.0042497
TraesCS6B01G238500LC	3-oxoacyl-[acyl-carrier-protein] synthase 3	6B	159423523	1.45395		3.26292	1.26e-07	3.67431	0.000254374	3.42655	2.03174e-05	2.68065	0.00620881
TraesCS3A01G457700LC	Leucine-rich repeat receptor-like protein kinase PXC2	3A	568144939	1.02579		3.25053	0.0443686			4.19604	0.0205711	4.60885	0.0313337
AML47768	Hypothetical Protein, Calcium binding	3B	8460000	21.2802		3.24739	1.06e-13	2.53444	0.000299303	3.2279	1.40186e-08	3.6476	1.76762e-08
TraesCS3B01G314500LC	Transposon protein, putative, CACTA, En/Spm sub-class, expressed	3B	281520420	5.15632		3.24665	7.07e-05	5.84749	6.15816e-07	2.69707	0.0091103	3.36928	0.00468222	-3.15042	0.00299263
TraesCS7B01G342100	F-box domain containing protein-like	7B	597186286	1.3103		3.24028	0.000229904	3.78458	0.00929261	2.48805	0.0396544	3.81773	0.00558203
TraesCS4A01G281900LC	Transposon protein, putative, CACTA, En/Spm sub-class	4A	402278609	2.98382		3.23819	4.88e-05	5.16336	1.24175e-05	2.88822	0.00423012	3.23152	0.00653294
TraesCS5D01G531300LC	B3 domain-containing protein	5D	496279711	0.767873		3.21463	0.00469278
TraesCS7B01G483400LC	Serine/threonine-protein kinase	7B	516262800	1.11084		3.19937	2.78e-12	3.50785	1.11554e-05	2.89201	7.08831e-06	3.14071	7.29106e-05
TraesCS5B01G095600LC	HAT transposon superfamily	5B	71997849	0.855635		3.19185	0.0477078
TraesCSU01G118000LC	Retrovirus-related Pol polyprotein from transposon TNT 1-94	Un	64328951	2.38585		3.18587	0.0148271	5.86411	0.00239097
TraesCS4A01G484100	F-box family protein	4A	738742090	0.771294		3.15897	0.0271144
TraesCS7A01G354800LC	Transposon protein, putative, Mutator sub-class	7A	275272109	1.1923		3.13783	2.45e-08	4.52539	9.37368e-07	3.19587	3.18418e-05	3.35935	0.000321417
TraesCS2B01G129700	NBS-LRR disease resistance protein-like protein	2B	97338532	7.93075		3.13169	3.43e-24	3.06297	1.96497e-10	3.0387	8.51203e-14	3.4744	3.63662e-13
TraesCS2D01G285800LC	GDT1-like protein	2D	251024310	1.6891		3.11998	0.0384286
TraesCS2B01G098600LC	ATP-dependent zinc metalloprotease FtsH 2	2B	46890631	2.0538		3.10797	0.00193803			3.3833	0.00703384
TraesCS1D01G113800	Gag polyprotein	1D	109979507	2.5462		3.10794	8.96e-07	3.2124	0.00127961	2.61736	0.00125867	4.24518	9.88256e-06
TraesCS2B01G085700LC	Lupus brain antigen 1-like protein	2B	41156487	1.25656		3.10646	0.0074349					4.31139	0.0108117
TraesCS2B01G832800LC	Cysteine-rich receptor-kinase-like protein	2B	753664905	0.966871		3.10053	0.0480574
TraesCS6D01G253300LC	Keratin, type I cytoskeletal 19	6D	213393306	0.889891		3.09927	0.000299857	3.66687	0.0122719	3.55331	0.00203483
TraesCS6B01G225700LC	Sister chromatid cohesion 1 protein 1	6B	151859345	1.92404		3.09444	0.0117785
TraesCS3B01G026900	E3 ubiquitin-protein ligase	3B	11659066	1.7568		3.08454	4.05e-06	3.75417	0.000973972	3.57374	8.95382e-05	2.72787	0.0144737
TraesCS5A01G119900	Transposon Ty3-I Gag-Pol polyprotein	5A	253596702	3.49855		3.07982	0.0229315					6.45893	0.00049537
TraesCS6D01G057200LC	F-box family protein	6D	24697120	2.11889		3.06723	0.0181907
TraesCS3A01G557800LC	N-(5'-phosphoribosyl)anthranilate isomerase	3A	660898016	0.857942		3.06372	0.041131			4.05056	0.0232444	4.31845	0.0418286
TraesCS2A01G563900	Receptor-kinase, putative	2A	764308980	137.411		3.06126	6.05e-06
TraesCS2B01G620800	Receptor kinase	2B	795051286	3.93012		3.054	1.5e-08	4.8267	2.46135e-08	2.76391	0.000153436	3.60645	2.18266e-05	-2.06278	0.0178231
TraesCS5A01G547400	RING/U-box superfamily protein	5A	701298386	44.86		3.05334	9.61e-14	3.51875	1.50407e-08	2.93501	7.40772e-08	2.76036	1.40095e-05
TraesCS5A01G210100LC	Transposon Ty3-G Gag-Pol polyprotein	5A	253593703	2.814		3.04563	0.0188313					6.25355	0.000501553
AML47759	PAP fibrilling domain containing protein	3B	8300000	4.58363		3.03443	4.04e-27	3.08916	2.09234e-11	3.17439	2.21191e-16	3.0858	1.33372e-11
TraesCS2A01G134200LC	Guanine nucleotide exchange factor SDC25	2A	79297471	0.968043		3.03401	0.000130443			3.79433	0.000157167	2.64311	0.0370307
TraesCS3B01G489600LC	Transposon protein, putative, Mutator sub-class	3B	512426454	11.2297		3.02886	0.0192269			3.76738	0.018461
TraesCS2B01G083700	Glycosyltransferase	2B	46677534	31.2202		3.02076	0.00121648			3.14577	0.00806907	3.15976	0.0247727
TraesCS3B01G314400LC	Transposon protein, putative, CACTA, En/Spm sub-class, expressed	3B	281418145	4.37244		3.0176	4.45e-09	4.86169	1.9411e-09	2.52667	0.000230137	2.95127	0.000233925	-2.33502	0.00251726
TraesCSU01G254900LC	F-box like protein	Un	190885868	3.23287		3.01298	0.0140037			3.10326	0.043976
TraesCS6B01G120500	Cytochrome P450 family protein	6B	115683135	2.98277		3.00914	0.000127523	2.90323	0.0227701	3.65385	0.00021588
TraesCS6B01G379700	Alpha/beta-hydrolase superfamily protein	6B	654736000	5.44778		3.00909	0.0252925			5.9001	2.59413e-06			4.42064	0.000153389			-3.3903	0.0445908
TraesCS3B01G459600LC	5'-3' exonuclease family protein	3B	473401511	3.65208		3.00756	0.00067479	5.14791	1.29687e-05	3.84044	9.47191e-05					-3.71831	0.00189428
TraesCSU01G118100LC	Dynactin subunit 1	Un	64330103	1.69786		3.00645	0.0137375	5.27024	0.00450247
TraesCS6D01G397500	calcium-dependent protein kinase 18	6D	469344082	1.89505		3.00584	7.81e-08	1.97424	0.0149268	3.83609	1.05163e-09	3.63551	2.3244e-06	1.86185	0.00921744
TraesCS6A01G049000LC	Protein VERNALIZATION INSENSITIVE 3	6A	20798304	0.554326		3.00013	0.0285081
TraesCS3B01G540800	Cellulose synthase-like protein	3B	779528069	4.38993		2.9874	1.57e-44	3.1025	2.37823e-15	2.85974	8.11561e-19	2.9975	1.11197e-14
TraesCS7B01G210500LC	Pol polyprotein	7B	162018336	0.797312		2.98446	2.38e-12	3.28925	1.07461e-05	2.71009	5.69836e-06	3.18502	1.50838e-05
TraesCS4B01G344000	MYB transcription factor	4B	637621553	0.763144		2.97032	0.0190451			3.52615	0.0438434
TraesCS1D01G300600LC	Zinc finger protein 136	1D	271862619	1.88613		2.96933	0.0371802	5.40845	0.00403404	3.23317	0.0453453
TraesCS7A01G217400	Embryogenesis transmembrane protein-like	7A	183916889	2.38177		2.96651	0.0424003
TraesCS5A01G119800	3'(2'),5'-bisphosphate nucleotidase 1	5A	253592929	83.734		2.95827	5.35e-08	2.92684	0.000292975	2.53925	0.000187499	6.32109	2.49044e-18			3.39425	1.0305e-06	3.78184	1.75916e-12
TraesCS4A01G711300LC	FAD/NAD(P)-binding oxidoreductase	4A	733764876	8.15857		2.95423	0.0266468					6.7469	2.84078e-05			4.61911	0.00589615	4.04275	0.0211322
TraesCS1A01G034900LC	Protein kinase family protein	1A	13486690	1.98371		2.95068	0.0143979			3.10916	0.0461268
TraesCS4B01G316100LC	RING finger protein	4B	381140445	1.19174		2.92311	0.0126978
TraesCS5A01G183900	Nuclear RNA export factor 1	5A	383828908	1.78495		2.9149	6.18e-05			4.00493	4.20418e-06	3.95808	0.000165549	2.42866	0.00729904	2.38181	0.0487937
TraesCS6A01G454400LC	kinase with adenine nucleotide alpha hydrolases-like domain-containing protein	6A	501184430	5.00874		2.89243	0.0102896			3.36123	0.0155758
TraesCS3B01G570200	Retrotransposon protein, putative, unclassified	3B	802100404	7.03103		2.87017	0.00165078	3.5805	0.00956376	2.51865	0.030043	3.09927	0.0204427
TraesCS5A01G210300LC	Gag-pol polyprotein	5A	253595868	1.44498		2.86076	0.0122897					5.20181	0.0016104
TraesCS1A01G018400	NBS-LRR disease resistance protein, putative, expressed	1A	9543510	11.3638		2.86007	3.24e-07	2.35466	0.0146848	3.033	5.34017e-05	3.44164	7.5545e-05
TraesCS2B01G880700LC	Myb/SANT-like DNA-binding domain protein	2B	777555736	1.24021		2.84888	0.00232418			2.83904	0.0124324	3.93437	0.00276735
TraesCS5B01G109000	Early nodulin-like protein 1	5B	152509191	2.53768		2.83787	4.75e-10	3.14248	0.000104162	2.81655	1.99764e-05	2.88031	0.000273602
TraesCS1A01G024000	SKP1-like protein 4	1A	11729436	16.8025		2.83727	0.000736269	4.25455	0.00122083	2.55856	0.0258964
TraesCS2D01G294700LC	AT hook motif-containing protein, putative	2D	261970160	2.32694		2.82486	0.028722			3.15172	0.0406869	5.48185	0.00132482			3.75178	0.044991
TraesCS3B01G276100LC	GW repeat- and PHD finger-containing protein NERD	3B	223697967	5.65419		2.79785	1.71e-07	2.46633	0.00998565	3.10748	3.38393e-05	2.33339	0.0107426
TraesCS2A01G014400	Acetate kinase	2A	5707438	2.21377		2.79546	0.0370025	5.56008	0.00245485
TraesCSU01G574800LC	1-aminocyclopropane-1-carboxylate oxidase	Un	395158372	20.4284		2.78537	7.81e-24	3.31749	1.54236e-14	2.86551	1.58808e-14	2.50452	8.38541e-09
TraesCS1B01G183200	Myosin	1B	330193820	59.5772		2.77617	9.61e-08			3.84944	5.94156e-10	3.20708	1.22412e-05	2.44267	1.48267e-05	1.80031	0.0234774
TraesCS1A01G023600	Disease resistance protein (TIR-NBS-LRR class), putative	1A	11621871	1.1921		2.76874	6.61e-05	2.86456	0.0232277	2.62108	0.00837561	2.83755	0.0176355
TraesCS1A01G023900	SKP1-like protein 4	1A	11670628	1.70101		2.76663	0.00132482	3.89418	0.00693389
TraesCSU01G128900LC	Kinase family protein	Un	71212604	14.533		2.76598	2.6e-07	1.84426	0.0337718	2.81361	1.91964e-05	2.87902	0.000186483
TraesCS6A01G283000	Dual specificity protein phosphatase, putative	6A	514320232	8.90462		2.75744	5.85e-12			2.81382	9.48283e-06	2.61513	0.000519774	1.4986	0.026536
TraesCS6A01G484900LC	Retrovirus-related Pol polyprotein from transposon TNT 1-94	6A	532795381	2.0698		2.74571	0.0284903			2.9224	0.0461654
TraesCS4B01G593000LC	Segregation and condensation protein B	4B	662392921	1.27265		2.74234	2.91e-05	2.52966	0.0206517	3.26222	0.000105258	2.5309	0.0144909
TraesCS4B01G394400	tRNA uridine 5-carboxymethylaminomethyl modification enzyme MnmG	4B	668445453	2.18441		2.73846	1.45e-06	2.91043	0.00174546	2.63362	0.000444575	3.49732	8.28057e-05
TraesCS1B01G552500LC	Senescence-associated protein, putative	1B	544625776	27.6989		2.72458	0.0434234			3.73695	0.0228597
TraesCS7A01G082100LC	Protein kinase	7A	32962897	1.60277		2.71866	0.00374777	3.84104	0.0120766			3.57157	0.01441
TraesCS2A01G073200	Poly(A) polymerase	2A	32386817	1.56272		2.71022	0.0366092
TraesCS3B01G034000LC	Protein kinase family protein	3B	13765243	5.91303		2.70809	0.000547496	3.03283	0.0151004	3.1098	0.00169561
TraesCS3B01G314100LC	Trans-acting enoyl reductase	3B	281165349	2.03768		2.70276	0.0443934	5.49323	0.00509983
AML47758	Uncharacterized Protein	3B	8280000	9.32914		2.70216	4.79e-30	2.57572	1.39977e-11	2.69907	7.48201e-17	2.81313	8.87954e-14
TraesCS3B01G272700LC	E3 ubiquitin-protein ligase	3B	219483927	21.7585		2.6868	0.00840938			3.00971	0.0287538
TraesCS6B01G242300	Flavonoid 3'-monooxygenase	6B	429259262	18.1613		2.68204	7.88e-62	2.53118	5.40207e-21	2.7082	1.68468e-31	2.86001	1.89669e-26
TraesCS7B01G328300	carboxyl-terminal peptidase (DUF239)	7B	582932467	2.52384		2.67946	5.28e-11	3.26938	1.42909e-06	2.55197	5.07322e-06	2.61356	9.06449e-05
TraesCS5A01G004300	Plasma membrane ATPase	5A	2970569	59.7901		2.67573	1.21e-05	3.29807	0.000756709	2.6233	0.00148376	2.37018	0.0168623
TraesCS3D01G201200	Nucleolar RNA binding protein	3D	238458366	5.45353		2.67012	0.000557128			4.04185	6.98395e-06			2.19594	0.0218289
TraesCS5B01G568400LC	Transposable element protein, putative	5B	556640467	3.89514		2.6698	0.0287476			2.95851	0.0420482
TraesCS3B01G193100LC	HXXXD-type acyl-transferase family protein	3B	132004530	1.24081		2.66064	6.92e-11	2.28963	0.00178935	3.08375	1.12041e-07	2.43832	0.00054473
TraesCS2A01G128300LC	Ureidoglycolate lyase	2A	73146076	5.94255		2.65444	0.00397414			2.77888	0.0327209
TraesCSU01G132000LC	BTB/POZ domain-containing protein	Un	73933006	1.73694		2.65312	0.0355392	5.35667	0.00404407
TraesCS6B01G212200LC	Excisionase	6B	139419366	3.07579		2.64746	0.0375744	5.57918	0.000542129	3.06515	0.0288025					-4.39362	0.00575789
TraesCS1B01G448700	Receptor-like protein kinase	1B	667819590	9.5051		2.63691	0.00783149	5.997	3.59533e-06	2.85069	0.0128331			-3.14631	0.00744579	-4.56196	0.000325556
TraesCS7A01G078600	tRNA-2-methylthio-N(6)-dimethylallyladenosine synthase	7A	43438753	1.54427		2.62743	2.57e-11	2.95749	2.23366e-05	2.42863	9.23218e-06	2.32934	0.000516291
TraesCS7A01G082000LC	Triose phosphate/phosphate translocator, chloroplastic	7A	32958938	1.6131		2.62609	0.00858097	4.13447	0.00878666
TraesCS2D01G460300	GPI mannosyltransferase 2	2D	566986849	3.64691		2.61092	1.4e-07	3.5214	4.57209e-06	2.82805	9.52621e-06	2.25942	0.00342564
TraesCS2A01G052300	Retrovirus-related Pol polyprotein from transposon TNT 1-94	2A	20645478	1.62757		2.60859	0.00109937	3.02278	0.0235393	2.5438	0.017475	2.7793	0.0291295
TraesCS7B01G343300	O-fucosyltransferase family protein	7B	598474027	6.36661		2.60446	3.73e-09	3.96526	1.92007e-09	2.16659	0.000150686	3.53728	5.76506e-08	-1.79868	0.0040943
TraesCS3B01G489500LC	Dolichyl-diphosphooligosaccharide--protein glycosyltransferase subunit 1	3B	512417394	3.65848		2.60197	0.0198898	3.68256	0.0285988	3.3159	0.0140557
TraesCS1A01G028700	Disease resistance protein (TIR-NBS-LRR class) family	1A	13453279	8.21169		2.59489	0.00574636			3.14713	0.00907209
TraesCS5A01G514400LC	Protein kinase, putative	5A	567940836	10.2122		2.57414	1.04e-39	2.72069	1.95851e-15	2.63824	1.67931e-19	2.46448	4.08651e-13
TraesCS6B01G144200LC	F-box family protein	6B	83200263	6.81289		2.5731	1.05e-07	2.8281	0.000217607	2.7907	1.02529e-05	2.06142	0.00746859
TraesCS2B01G288900	S-locus lectin protein kinase family protein	2B	399398389	43.7676		2.56343	3.04e-12	2.34421	4.72498e-05	2.43218	4.92617e-07	3.42186	1.7406e-10
TraesCS2B01G862100LC	zinc finger (C2H2 type) family protein	2B	769905554	1.98555		2.55947	6.92e-11	3.02848	4.01518e-06	2.41309	5.06975e-06	2.54558	6.97375e-05
TraesCS6B01G214300	Tetraspanin family protein	6B	289767474	3.09895		2.55404	0.000791728	2.97189	0.0175318	2.7557	0.00574396
TraesCS5A01G424100LC	disease resistance protein (TIR-NBS-LRR class)	5A	504780699	3.57291		2.53989	0.0145518					3.98073	0.00843759
TraesCS2B01G077400	RING/U-box superfamily protein	2B	42957074	2.66099		2.52934	1.09e-11	2.42929	0.000121159	2.35693	4.67337e-06	3.02032	1.08828e-06
TraesCS1D01G012600	Defensin	1D	6547769	4.58433		2.52296	8.77e-25	2.64815	2.57932e-09	2.68565	3.1138e-13	2.55802	5.88911e-09
TraesCS5A01G052800	Gag polyprotein	5A	47772046	19.8273		2.52164	9.22e-71	2.54404	2.0119e-28	2.52201	5.24627e-37	2.50901	1.23234e-27
TraesCS7B01G210600LC	Transposon Ty3-I Gag-Pol polyprotein	7B	162019404	1.51438		2.5192	5.15e-14	2.66524	9.52612e-06	2.49337	2.40931e-07	2.63099	8.73001e-06
TraesCS2A01G018700LC	Volume-regulated anion channel subunit LRRC8D	2A	8313510	1.12541		2.51592	0.00483301			3.04939	0.00749001
TraesCSU01G011700	Cytochrome P450 family protein, expressed	Un	15759071	40.4344		2.51035	2.86e-05	2.51856	0.00766118	2.51634	0.000925363	2.23405	0.0145412
TraesCS2B01G627200	NAC domain-containing protein, putative	2B	799046081	1.44432		2.50953	0.00275005	3.42327	0.015894	2.84898	0.0119495
TraesCS6D01G398500	F-box protein	6D	469615840	4.30949		2.50062	4.59e-18	2.12863	2.37385e-06	2.4856	2.59458e-11	2.8549	1.56196e-10
TraesCS5A01G424500LC	Retrotransposon protein, putative, unclassified, expressed	5A	504878547	2.15393		2.49765	0.0447471
TraesCS7B01G038300	Pheophorbide a oxygenase, chloroplastic	7B	37359519	43.9233		2.49414	1.15e-12	1.80731	0.00159084	2.83287	2.64102e-10	2.39998	5.47183e-06	1.02556	0.0398494
TraesCS3B01G337000LC	Sucrose transporter-like protein	3B	330596711	1.48902		2.48626	0.0450877	5.17524	0.00471402					-3.20529	0.0481882
TraesCS5A01G430600LC	Squalene epoxidase	5A	510196827	2.07299		2.48005	0.00169794			2.99818	0.00434625
TraesCS1B01G186500	LanC-like protein	1B	333595519	4.42382		2.4737	7.35e-07			2.75777	2.52488e-05	2.68642	0.000558211
TraesCS2B01G862200LC	zinc finger (C2H2 type) family protein	2B	769911195	2.78825		2.47131	4.28e-07	3.21495	5.69363e-05	2.19767	0.00082643	2.50558	0.00137326
TraesCS7B01G677600LC	30S ribosomal protein S6	7B	672333598	1.38906		2.46348	1.2e-12	2.72338	8.56881e-06	2.15188	5.45931e-06	2.20685	0.000166794
TraesCS5A01G219100LC	Protein FAR1-RELATED SEQUENCE 3	5A	268595903	6.69358		2.46042	0.00439172					4.11055	0.00120261
TraesCS7B01G281600	PAB-dependent poly(A)-specific ribonuclease subunit pan3	7B	516255384	2.91629		2.4591	8.09e-20	2.37865	9.072e-07	2.53029	1.87535e-10	2.72994	1.59684e-08
TraesCS3B01G401100LC	DCD (Development and Cell Death) domain protein	3B	405938057	14.5733		2.45795	0.00268041	7.05199	2.25179e-10	2.19168	0.0343759			-4.86032	3.41108e-08	-4.91273	4.92572e-06
TraesCS1D01G103200	Lipase	1D	92959196	543.554		2.45191	2.44e-06	2.48812	0.00200352	3.10265	1.47082e-06
TraesCS6A01G505900LC	SPOC domain / Transcription elongation factor S-II protein	6A	553858329	4.68609		2.44793	1.28e-15	1.79843	0.000299642	2.45724	7.95563e-10	2.74038	7.59821e-09
TraesCS2B01G165300	F-box protein	2B	137607205	5.67175		2.44542	0.0045592			2.8068	0.00542884	3.34236	0.00449972
TraesCS5A01G296500	Disease resistance protein (NBS-LRR class) family	5A	504781599	6.871		2.42687	0.00615481			2.59775	0.0189734	4.07384	0.00102296
TraesCS5B01G014100	WAT1-related protein	5B	13496733	5.84653		2.42635	2.29e-23	2.51554	1.42561e-10	2.37594	5.2204e-13	3.00788	2.29426e-14
TraesCS2A01G002700	3'-N-debenzoyl-2'-deoxytaxol N-benzoyltransferase	2A	1685581	16.2815		2.42337	7.07e-05	2.03917	0.048462	2.58091	0.00111976	2.50593	0.00773026
TraesCS3B01G252700	ATP-dependent RNA helicase	3B	405817422	9.3555		2.41908	0.00558763	5.92696	8.93271e-07					-3.93599	8.71744e-05	-3.88312	0.00166643
TraesCS5A01G303900LC	Nuclear transportin	5A	391442252	3.44076		2.41727	0.0454669			2.79214	0.0389913	3.46593	0.0270348
TraesCS6B01G147400LC	Rubber elongation factor protein, putative	6B	85439531	9.84079		2.41387	3.15e-10	2.28656	0.000270614	2.72394	1.05963e-07	1.93042	0.00188279
TraesCS6B01G008700	Aristolochene synthase	6B	5682862	438.766		2.40289	0.0228524
TraesCS6A01G184400LC	AT hook motif-containing protein, putative	6A	107614178	3.26832		2.40201	0.00533539	3.8868	0.0108525			5.23854	0.000202142
TraesCS4B01G163700	Phosphatidate phosphatase, Lipin	4B	335937740	72.6783		2.39943	0.0273598					3.44201	0.0352342
TraesCSU01G014000LC	Trigger factor	Un	8119050	6.27367		2.39358	2.7e-05	2.69008	0.00247834			3.36478	5.3025e-05					1.92452	0.0485011
TraesCS6D01G289700LC	Retrovirus-related Pol polyprotein from transposon TNT 1-94	6D	273180083	2.37625		2.39333	0.01236	3.29857	0.0213567	2.4772	0.0343081
TraesCS1A01G028800	Leucine-rich repeat (LRR) family protein	1A	13455279	17.0378		2.38583	0.00329305			2.73528	0.00987053
TraesCS3B01G033900LC	4-coumarate:CoA ligase 1	3B	13764745	3.4428		2.38215	0.00175103			2.86988	0.00331448
TraesCS3B01G238400	Mitochondrial carrier protein-like	3B	373622848	19.2308		2.3725	1.98e-05	5.18283	6.33565e-12	2.11449	0.0022666	2.0286	0.0139785	-3.06834	3.28801e-07	-3.15423	2.19527e-05
TraesCS5A01G120000	Pyruvate dehydrogenase E1 component alpha subunit	5A	253604999	51.7863		2.37171	1.25e-09	2.58365	9.66733e-06	2.02618	6.18499e-05	4.07847	7.02566e-14			1.49482	0.0165644	2.05229	6.80617e-06
TraesCS3B01G322000LC	5-aminolevulinate synthase, nonspecific, mitochondrial	3B	305803225	2.00528		2.36074	0.00137956	4.72822	1.5618e-05	2.02894	0.0358092			-2.69927	0.00746975	-2.98262	0.0119244
TraesCS6B01G388400	WEB family protein, chloroplastic	6B	663691005	2.96824		2.35973	1.5e-20	1.71252	4.79284e-05	2.70861	4.2261e-15	2.65319	3.40109e-10
TraesCS5D01G233400LC	30S ribosomal protein S10	5D	251933948	5.24928		2.35581	0.0152432	3.77454	0.00580857	2.32389	0.0467648
TraesCS5D01G286100LC	Thyrotropin-releasing hormone-degrading ectoenzyme	5D	321861397	3.70924		2.35576	0.00146278	3.77502	0.000818738	2.1681	0.0246231	2.2632	0.0485727
TraesCSU01G258300LC	E3 ubiquitin-protein ligase listerin	Un	197245972	4.72596		2.34686	0.00222941			2.12349	0.042231	3.04611	0.00978692
TraesCS1B01G030300LC	50S ribosomal protein L22	1B	15389180	1.78109		2.32202	5.05e-18	2.03187	4.36461e-05	2.43037	1.63098e-09	2.05088	2.54657e-05
TraesCS2B01G913700LC	Peroxidase	2B	793445994	16.1362		2.31541	1.38e-15	2.71143	9.33457e-10	2.30257	2.28637e-09	2.60402	3.1168e-09
TraesCS3B01G023100LC	Polynucleotidyl transferase, ribonuclease H-like superfamily protein	3B	9066698	36.7016		2.31315	0.000802428			2.61142	0.00489607
TraesCS3D01G474600LC	Tetratricopeptide repeat (TPR)-like superfamily protein	3D	502139450	5.07448		2.31023	0.0208541			2.92645	0.0175137
TraesCS2B01G082200	Protein kinase family protein	2B	45689126	1.49191		2.30893	0.0486465			2.94976	0.0293126
TraesCSU01G650500LC	Protein kinase-like	Un	459435945	16.3568		2.30719	2.13e-05			2.12739	0.00164529	2.24296	0.00474105
TraesCS6B01G378600	RING/U-box superfamily protein	6B	653221445	11.9797		2.30368	1.62e-47	2.53474	4.20659e-23	2.23911	6.93862e-25	2.27556	4.84645e-19
TraesCS4B01G611300LC	Ketol-acid reductoisomerase (NADP(+))	4B	669309680	3.60789		2.30174	6.73e-12	2.35747	7.24004e-05	2.26662	3.69293e-06	1.95659	0.000885726
TraesCS5D01G178800	transcription factor-like protein	5D	278260566	10.8842		2.30163	1.37e-15	2.55981	2.73385e-08	2.28395	8.28539e-09	2.16259	3.09671e-06
TraesCS6B01G070900	NBS-LRR-like resistance protein	6B	47275369	19.4379		2.29993	4.31e-38	2.71632	6.28241e-21	2.27299	8.95014e-20	2.17523	5.75326e-14
TraesCS5B01G268400LC	DUF639 family protein	5B	287621387	9.41587		2.29883	5.5e-14	1.86943	0.000233032	2.53203	6.68184e-10	2.45511	2.87987e-07
TraesCSU01G012700	RING/U-box superfamily protein	Un	15934854	26.0613		2.2906	0.015239			2.54898	0.0337479
TraesCSU01G046300	F-box family protein	Un	36334970	7.3965		2.27943	0.00363093	2.97448	0.0189337	2.09576	0.049719
TraesCS7B01G366100	zinc induced facilitator-like 1	7B	630091241	47.0831		2.27552	3.83e-10	2.77828	3.06048e-07	2.51197	8.7734e-08	1.53283	0.00843393			-1.24545	0.0422087
TraesCS5B01G721200LC	F-box domain containing protein	5B	672096640	7.88736		2.27272	0.00895046	5.02097	8.45322e-06			2.90651	0.0117318	-3.32871	0.000438189
TraesCS6B01G808300LC	F-box protein	6B	714422094	1.34743		2.27216	0.00891109					3.27104	0.0126443
TraesCS2A01G243600	Caprin-2	2A	343417183	6.15958		2.26871	0.0152432			2.74215	0.018964
TraesCS2B01G615500	Protein NRT1/ PTR FAMILY 5.5	2B	793413273	17.6018		2.26623	5.81e-20	2.41515	5.7671e-09	2.07626	8.06953e-09	2.6461	8.21099e-11
TraesCS2B01G081900	Leucine-rich repeat receptor-like protein kinase family protein	2B	45672581	9.33711		2.25022	0.0477881			2.87878	0.0383506
TraesCS1B01G501300LC	Gamma-aminobutyric acid receptor subunit alpha-6	1B	492856215	1.2952		2.24569	0.030694			3.03701	0.0108956							-3.18134	0.0202062
TraesCS7D01G006700	Disease resistance protein	7D	3436919	7.08554		2.23332	4.96e-08	2.17924	0.000601129	2.17439	2.80117e-05	1.85554	0.00294104
TraesCS4B01G006300	NBS-LRR disease resistance protein-like protein	4B	4134300	1.83851		2.22857	0.00820834			2.69899	0.0122316
TraesCS2B01G054900LC	F-box family protein	2B	25787557	4.16378		2.22735	1.05e-12	2.30876	1.81488e-05	2.07679	3.56828e-06	1.71688	0.00147172
TraesCS2B01G444600	Carbamoyl-phosphate synthase large chain	2B	637508272	1.86836		2.22683	0.0187829					3.07914	0.0247947
TraesCS3B01G345500	Retrovirus-related Pol polyprotein from transposon TNT 1-94	3B	555157465	15.7444		2.22286	3.74e-06	2.68877	0.000363176	2.55154	4.48274e-05
TraesCS3B01G143000	Glycosyltransferase	3B	132005442	3.35116		2.22016	1.95e-08	1.38213	0.034422	1.19058	0.0234668
TraesCS1B01G580900LC	Retrotransposon protein, putative, Ty1-copia subclass	1B	563958798	6.60756		2.21852	7.25e-06	2.07255	0.0111809	2.25978	0.00046016	2.11052	0.00627776
TraesCS1B01G022300	Receptor-like kinase	1B	10067448	15.4079		2.20227	1.72e-06	1.91244	0.00994409	2.3059	7.72575e-05	2.45847	0.000304529
TraesCSU01G596100LC	Senescence-associated protein, putative	Un	409984883	15.9372		2.18366	1.84e-07	2.23533	0.000996681	2.53216	4.24517e-06	1.68877	0.0129222
TraesCS7B01G246400	Initiation factor 2 subunit family protein, expressed	7B	456123104	1.19464		2.17765	0.0313413			2.64636	0.0316739
TraesCS1D01G179700LC	Protein FAR1-RELATED SEQUENCE 5	1D	143336067	3.96964		2.17761	9.22e-09	2.15241	5.77254e-05	2.78163	1.87535e-10	1.19382	0.0322722					-1.58781	0.00109274
TraesCS7B01G381000LC	Transposable element protein, putative, Retrotrans_gag	7B	383861832	2.1706		2.17437	1.06e-12	2.81285	9.0718e-07	2.12074	3.23449e-06	2.30333	3.28944e-05
TraesCS4B01G005900	Cytochrome P450 family protein, expressed	4B	3859572	77.6899		2.14587	2.22e-06	2.10513	0.00419848	2.32833	7.75662e-05	1.98897	0.00485857
TraesCS2A01G057300	O-acyltransferase WSD1	2A	24154220	1.53112		2.14087	0.00810629	2.696	0.0451706
TraesCS1A01G028600	Disease resistance protein (NBS-LRR class) family	1A	13414048	40.881		2.13689	1.25e-10	1.48287	0.00742597	2.62436	5.2049e-10	1.80983	0.000412298	1.14149	0.00932183
TraesCS6B01G120000	F-box domain containing protein	6B	114879591	2.0265		2.13626	0.000169726	2.64367	0.0041321	2.56631	0.000444176
TraesCS2B01G226100LC	SKP1-like 7	2B	137347157	5.88681		2.13599	0.000291025			2.42975	0.000469738	3.5188	1.17098e-05			2.35636	0.00526472
TraesCS6B01G552100LC	RNA-binding protein Nova	6B	529894969	3.463		2.1293	6.98e-08	2.68011	1.50297e-05	2.18861	1.84932e-05	1.46666	0.02071
TraesCS6B01G206700	Argonaute family protein	6B	260540332	0.715297		2.1289	0.0121748	3.28661	0.0108585	2.23935	0.0362197
TraesCS4B01G154300LC	Transposon protein, putative, CACTA, En/Spm sub-class	4B	140986611	1.51102		2.12669	0.0390953
TraesCS1A01G028900	NBS-LRR-like resistance protein	1A	13569533	66.5637		2.12154	1.31e-07	1.81006	0.00809897	2.25754	2.70447e-05	2.49202	5.86473e-05
TraesCS3B01G004500	Isoflavone reductase-like protein	3B	2507255	17.5273		2.12063	0.0221692			2.99889	0.00721362
TraesCS2B01G615600	Peroxidase	2B	793446051	16.4109		2.11287	1.96e-14	2.38027	1.80408e-08	2.11649	7.3836e-09	2.21224	1.53713e-07
TraesCS4B01G006400	NBS-LRR disease resistance protein-like protein	4B	4135871	1.80214		2.11089	0.00202456	2.86115	0.0129898	2.45852	0.00721671
TraesCS4D01G038600LC	Retrovirus-related Pol polyprotein from transposon TNT 1-94	4D	23901925	2.84246		2.10507	0.0034013	2.61647	0.0218544	1.8882	0.0456258	2.54492	0.01881
TraesCS6B01G177100LC	F-box domain containing protein	6B	114880837	6.51817		2.09766	4.95e-05	2.29065	0.00617785	2.53549	0.000135515
TraesCS2B01G278100LC	Protein MOR1	2B	183509041	1.04977		2.09523	0.0322098					3.89008	0.00225552
TraesCS1A01G029100	Disease resistance protein (TIR-NBS-LRR class) family	1A	13663299	29.3128		2.09356	6.27e-11	1.68897	0.00298308	2.35499	1.49302e-07	2.04974	0.000107526
TraesCS5A01G015800	WAT1-related protein	5A	11133327	21.0222		2.09062	1.18e-31	1.80113	5.61707e-11	2.19209	5.71288e-21	2.28706	2.87382e-17
TraesCSU01G264700	FGGY family of carbohydrate kinase	Un	430608714	1.48999		2.09021	8.84e-09	1.49091	0.0288658	1.79875	0.000563387	1.8636	0.00351653
TraesCS2B01G357900LC	ATP-dependent Clp protease ATP-binding subunit ClpX	2B	286510701	1.86518		2.082	0.0402633			2.84861	0.0217994
TraesCSU01G038000	RNA-binding region RNP-1	Un	31599109	5.87093		2.07488	5.29e-11	2.32338	5.71484e-06	2.047	2.28561e-06	1.50729	0.00418398
TraesCS6B01G139500	Terpene cyclase/mutase family member	6B	136521269	63.2828		2.07347	2.55e-25	2.1899	6.82322e-12	2.05274	1.26833e-13	2.19806	3.28123e-12
TraesCS1A01G397200LC	Thiopurine S-methyltransferase	1A	448341392	2.05176		2.0689	0.000789683	2.675	0.010145	1.98422	0.0191631
TraesCS2B01G440600	Leucine-rich repeat protein kinase family protein	2B	632518821	10.8905		2.06583	3.25e-20	2.15337	2.08927e-09	2.1099	5.28858e-12	2.39885	1.26545e-11
TraesCS2D01G590800	Disease resistance protein (NBS-LRR class) family	2D	646498619	1.02934		2.05957	0.0452469	3.84016	0.0165257
TraesCS5A01G047500LC	ATPase E1-E2 type family protein / haloacid dehalogenase-like hydrolase family protein	5A	30688558	2.19073		2.05662	3.68e-07	2.90592	2.19729e-05	2.17795	8.55776e-05	1.93759	0.00398104
TraesCS6B01G652600LC	Cytochrome P450 97B2, chloroplastic	6B	630608962	23.5973		2.05603	1.96e-09	1.87215	0.000902214	2.09801	4.6932e-06	2.30161	1.33449e-05
TraesCS7B01G352300	Xyloglucan 6-xylosyltransferase 1	7B	608874975	5.39636		2.0413	1.25e-18	1.60694	1.01552e-05	2.22144	9.42603e-14	2.00747	1.35778e-08
TraesCS7D01G090600LC	Retrovirus-related Pol polyprotein from transposon TNT 1-94	7D	40594490	3.71671		2.03961	0.00634916	2.49659	0.0347785			2.84357	0.00962708
AML47754	Glycosyltransferase HGA-like	3B	8200000	8.64363		2.0386	7.48e-38	1.78091	7.74511e-11	2.17288	4.42715e-21	2.03869	6.10305e-14
TraesCSU01G214700	Alpha/beta-hydrolase superfamily protein	Un	317990583	4.56004		2.0383	0.031042			3.23292	0.000999278	5.30199	3.23773e-06	2.7999	0.00276672	4.86897	5.65976e-06
TraesCS6D01G065100	Linalool synthase, chloroplastic	6D	31751235	3.87648		2.03794	1.26e-07	1.82604	0.00462556	1.47784	0.00499646	1.70834	0.00577956
TraesCSU01G147400	Protein PLANT CADMIUM RESISTANCE 2	Un	170192274	16.986		2.03689	0.00626823			2.29156	0.0161129
TraesCS1B01G022400	Receptor-like kinase protein	1B	10072757	6.70743		2.03654	3.78e-09	1.62785	0.00320505	2.41432	2.43574e-08	2.08431	4.97405e-05
TraesCS6B01G140300	Branched-chain-amino-acid aminotransferase	6B	139416457	2.9298		2.0365	2.07e-05	2.59312	0.000429609	2.25199	0.000161516	1.57943	0.0337772
TraesCS5D01G474400LC	HTH-type transcriptional regulator EcpR	5D	451128705	3.01703		2.03626	0.0185373	3.60489	0.0045871			4.02671	0.00078146
TraesCS1B01G461200	light harvesting complex photosystem II	1B	674373938	2.13236		2.03566	1.13e-05	2.58984	0.00018462	2.24204	5.83007e-05	1.59208	0.0211577
TraesCSU01G131400LC	Translation initiation factor IF-2	Un	73439881	1.61224		2.02037	0.0169808	4.34634	0.000555124					-2.69018	0.0178803
TraesCS1B01G476000	SPOC domain / Transcription elongation factor S-II protein	1B	684213628	7.59398		2.00687	3.16e-10	1.65518	0.00183691	2.24676	9.65767e-08	1.91418	0.000135234
AML47757	Alanyl-tRNA synthase	3B	8260000	18.0032		2.00482	2.02e-05	2.36401	0.000918984	2.17491	0.000223399	2.42681	0.000395142
TraesCS7D01G146600LC	50S ribosomal protein L14	7D	73116561	10.1578		2.00264	6.57e-43	2.1331	4.19805e-17	2.03392	3.9581e-21	2.07825	2.16944e-16
TraesCS2A01G660500LC	HAT transposon superfamily, putative	2A	730605151	0.973561		1.99927	0.0378524			2.7222	0.0301099
TraesCS2A01G002900	Cytochrome P450 family protein, expressed	2A	1783498	29.5662		1.99725	5.32e-05			2.24441	0.000447917	2.28993	0.00234309
TraesCS2B01G000700	3'-N-debenzoyl-2'-deoxytaxol N-benzoyltransferase	2B	317840	12.9323		1.99488	0.000317552			2.27504	0.001364
TraesCS4B01G083200	Eukaryotic translation initiation factor 3 subunit B	4B	82018340	144.877		1.99312	3.45e-77	1.9313	2.03747e-23	1.82658	1.10253e-26	1.8808	2.97963e-22
TraesCS7B01G569400LC	Phenylalanine--tRNA ligase beta subunit	7B	595449511	5.9338		1.98888	5.19e-08	2.44066	2.07416e-05	1.68228	0.000558938	2.40848	1.88143e-05
TraesCS5B01G517800	70 kDa heat shock protein	5B	681047621	4.95975		1.98806	0.0268086			3.09863	0.00204642	2.72675	0.0253673	2.81276	0.00302594
TraesCS6B01G244100LC	1-phosphatidylinositol-4-phosphate 5-kinase 3	6B	164817222	4.12625		1.97433	0.00859805	2.51484	0.0367528
TraesCS7D01G140200	ENTH/ANTH/VHS superfamily protein	7D	89598935	452.697		1.97151	3.9e-174	1.93103	5.2457e-52	1.93371	5.1018e-66	1.92242	1.25586e-51
TraesCS3B01G539300LC	HAT transposon superfamily	3B	565440342	1.51006		1.96972	0.00967025			2.77051	0.00105366	2.96731	0.00389134
TraesCS5B01G445500	Endo-1,4-beta-xylanase	5B	617434478	0.820953		1.9693	0.0137596	3.03409	0.0236146			2.95771	0.0201023
TraesCS1B01G438900	F-box family protein	1B	660894903	6.74103		1.96595	2.74e-09	1.8596	0.000965297	1.98874	1.29586e-05	2.03186	0.000160369
TraesCS2B01G254800	Glyoxylate reductase	2B	286508202	3.14346		1.95689	0.00899825			2.39547	0.0114722
TraesCS3A01G077300	Cytochrome P450 family protein, expressed	3A	48663109	24.0506		1.94817	3.43e-09	1.36844	0.0126071	2.0607	1.07989e-06	2.54051	1.10047e-07			1.17207	0.0316966
TraesCS6A01G103900	Receptor-like protein kinase	6A	73068423	3.19136		1.94196	0.00141031			1.83205	0.0145977	2.96481	0.00061858			1.98525	0.0392574
TraesCS5B01G721300LC	F-box family protein	5B	672107407	4.36155		1.93924	0.000922379	4.31246	5.05667e-08			2.92828	0.000146433	-2.95882	1.63947e-05
TraesCS5A01G299400LC	QUASIMODO2 LIKE 1	5A	382783689	3.96048		1.93382	2.04e-06	2.09378	0.00173795	1.85271	0.000644727	2.22402	0.000498341
TraesCS6B01G463000LC	BED zinc finger,hAT family dimerization domain	6B	426739553	2.18123		1.92236	7.46e-12	2.11671	1.53608e-05	1.52069	0.000114384	1.94057	5.14678e-05
TraesCS2B01G084000	Receptor-kinase, putative	2B	46889503	33.3396		1.91944	0.0396461
TraesCS6A01G130200LC	Beta-glucosidase	6A	68977326	2.02773		1.91833	0.0148704			2.12938	0.0256988
TraesCS2B01G623700	Protein kinase	2B	797230138	9.76772		1.91754	8.76e-05	2.26615	0.0024284
TraesCS4B01G019300	Zinc transporter	4B	13998189	1.83694		1.91552	0.00676189			2.24017	0.015208	2.41314	0.0296097
TraesCS3B01G195400	Polynucleotidyl transferase ribonuclease H-like superfamily protein	3B	221979961	3.77163		1.91148	1.41e-20	1.90039	1.60937e-07	2.14468	7.60001e-13	1.79302	5.80875e-07
TraesCS5B01G309600	Gag polyprotein	5B	491849096	35.638		1.91112	0.00571051					2.80543	0.0064878
TraesCS1A01G386100LC	P-loop containing nucleoside triphosphate hydrolases superfamily protein	1A	435405516	3.35519		1.90865	2.63e-05	2.33147	0.0010749	1.52205	0.0104685	2.63511	0.000119544
TraesCS2B01G624200	Glutamyl-tRNA(Gln) amidotransferase subunit A	2B	797464154	8.25388		1.90764	0.000137792	2.68106	0.000877133	2.01971	0.00280752
TraesCS6A01G338500LC	ATP-dependent rRNA helicase spb4	6A	335912594	2.28695		1.90679	0.0490098			2.26486	0.0363594	3.7756	0.00224616			2.99204	0.0225894
TraesCS1B01G581000LC	Retrovirus-related Pol polyprotein from transposon TNT 1-94	1B	563961134	3.53725		1.90499	1.3e-05	1.82914	0.0115548	1.8264	0.00142526	2.04769	0.00259691
TraesCS6B01G201900	F-box like protein	6B	246676113	2.43393		1.90226	6.91e-07	1.85506	0.00307166	1.99214	5.62405e-05
TraesCS4B01G515100LC	Receptor-like protein kinase	4B	613388364	2.49955		1.90152	2.13e-06			2.19781	2.13178e-05	1.32416	0.0421535
TraesCS6A01G020400	Histidine-containing phosphotransfer protein	6A	9482379	1.372		1.90068	0.0188029			2.04306	0.0450815
TraesCS2B01G853100LC	Transcriptional factor B3 family protein	2B	765085447	1.43269		1.89813	0.037639
TraesCSU01G167700	Chlorophyll a-b binding protein, chloroplastic	Un	246248430	11.23		1.89543	4.14e-05			2.27251	0.00905388	4.43256	4.13224e-06	2.22653	0.0063295	4.38658	3.91288e-07
TraesCS2A01G110900	NBS-LRR disease resistance protein-like protein	2A	62355830	9.68093		1.89384	2.86e-21	1.70984	1.41641e-07	1.73048	2.72936e-10	1.85483	6.13636e-09
TraesCS6B01G502300LC	fanconi anemia group I-like protein	6B	471165240	4.57256		1.89212	4.79e-07	2.0666	0.0012798	1.85347	0.000384302	2.31942	0.000150181
TraesCS3A01G095200LC	Cytochrome P450 family protein, expressed	3A	48663833	23.8503		1.88621	2.93e-08	1.22385	0.0357922	1.94484	9.66618e-06	2.28783	5.6383e-06
TraesCS1B01G030500	cDNA clone:J013058P10, full insert sequence	1B	15097669	2.99426		1.88134	0.000310655	1.87514	0.0440244	1.88051	0.0102053	1.84247	0.0365923
TraesCS1B01G050400	Phospholipase D	1B	30543632	2.78286		1.88125	1.22e-08	1.96546	0.000101758	1.51534	0.000302756	1.60488	0.00133366
TraesCS2B01G001100	Cytochrome P450 family protein, expressed	2B	477193	3.72889		1.87957	2.21e-05			2.45695	5.25784e-06	2.02006	0.00196887	1.47028	0.00969951
TraesCS3B01G783500LC	B3 domain-containing protein	3B	771513155	3.72378		1.87474	6.58e-10	1.50351	0.00350456	2.15951	8.89157e-08	1.64822	0.000745875
TraesCS2B01G683100LC	Protein FAR1-RELATED SEQUENCE 5	2B	642830727	3.82165		1.87449	1.74e-10	1.94971	2.90499e-05	1.80481	2.66004e-06	2.0048	1.14241e-05
TraesCS2B01G898300LC	DNAse I-like superfamily protein	2B	787323346	1.60497		1.87258	0.00205245	3.77735	6.82489e-06			2.7054	0.00121477	-2.38894	0.00233355
TraesCS5B01G169800LC	Poly(A) polymerase	5B	152507424	6.76849		1.87214	0.000178999	1.905	0.0324677	1.97551	0.00487244	2.14351	0.00950815
TraesCS4A01G457700LC	Serine/threonine protein phosphatase 7 long form isogeny	4A	598519420	3.66071		1.87157	0.0449351
TraesCS1B01G395800	50S ribosomal protein L2, putative	1B	627841324	3.943		1.86756	0.000208047			1.74579	0.00994997	2.00307	0.0117876
TraesCS3D01G021600	Terpene synthase, putative, expressed	3D	7102511	4.30366		1.86735	1.82e-08	1.94668	0.000236055	2.06918	1.5206e-06	1.91259	0.000206799
TraesCS7B01G662000LC	Erythroblast NAD(P)(+)--arginine ADP-ribosyltransferase	7B	661913450	8.74766		1.86468	4.16e-22	1.80253	7.53474e-09	1.81759	5.37963e-12	2.09358	1.03857e-11
TraesCS4A01G389900	Gamma-aminobutyric acid receptor subunit gamma-2	4A	667174382	42.0303		1.86219	6.48e-11	1.5205	0.00127961	1.556	5.38474e-05	2.26823	1.20395e-07
TraesCSU01G203000LC	Embryogenesis transmembrane protein-like	Un	108765264	1.76611		1.86197	0.0249273			1.93882	0.0428741
TraesCSU01G153700	Receptor-like protein kinase	Un	197245771	16.7603		1.86122	1.1e-05	1.88184	0.00758406	1.76162	0.00202063	2.11442	0.00134164
TraesCS2B01G297000LC	Retrotransposon protein, putative, unclassified	2B	202496494	3.54541		1.85849	2.67e-08	2.15056	8.15848e-05	1.8153	5.09387e-05	1.98014	0.000217559
TraesCS2B01G114900	Protein kinase	2B	78071256	16.8476		1.85768	1.64e-05	2.46834	5.81152e-05	1.35174	0.0140422	1.96445	0.00146907	-1.1166	0.0499519
TraesCS6B01G178200LC	F-box domain containing protein	6B	115059899	19.4122		1.84725	0.00101268	2.75096	0.00131986	2.09634	0.0036318
TraesCS6A01G157400LC	DNA/RNA polymerases superfamily protein	6A	87234193	2.27478		1.83952	0.0348246			2.04551	0.0384669	3.53737	0.0017606			2.8286	0.0182728
TraesCS6B01G103700	F-box family protein	6B	82156668	2.25819		1.83831	8.21e-12	2.09103	1.57289e-06	1.63376	3.50557e-06	1.97734	3.97993e-06
TraesCS2B01G097400LC	NADPH:quinone oxidoreductase	2B	46603572	3.96223		1.833	8.99e-10	1.5366	0.00250435	2.14768	8.12099e-08	1.60314	0.000967318
TraesCS6B01G152700	Receptor kinase	6B	156529803	14.8332		1.82713	1.8e-08	2.77586	4.75808e-09	1.56807	0.000221613	1.47763	0.00342693	-1.20779	0.00524006	-1.29823	0.0138319
TraesCS2B01G114800	RINT1-like protein	2B	78062882	8.99148		1.82674	1.34e-10	2.41398	1.32107e-08	1.50659	4.99515e-05	1.69543	9.30721e-05
TraesCS2D01G461700	Basic helix-loop-helix transcription factor	2D	568090899	2.54175		1.82371	0.00211906	3.23264	0.000379342			2.33703	0.0086158	-1.79747	0.0379751
TraesCS2A01G014900	Cytochrome P450	2A	5927555	1.30522		1.82362	0.0101065
TraesCS5D01G040900LC	DNA-directed RNA polymerase I subunit rpa43	5D	26262344	5.8477		1.81995	0.0317034
TraesCS7B01G622000LC	calcium-dependent lipid-binding family protein	7B	633919437	1.18169		1.8166	0.0333822
TraesCS2B01G167400	F-box/RNI-like superfamily protein	2B	140744709	4.08431		1.81283	0.0121052			2.08872	0.0125585	3.88698	5.30326e-05			3.06014	0.00189428
TraesCS5D01G610300LC	Mitochondrial transcription termination factor family protein	5D	539977703	1.6609		1.81076	8.38e-05			1.80272	0.00199964	2.90205	5.75487e-05
TraesCSU01G084300	CLIP-associating protein 1	Un	75460411	33.7606		1.80872	0.000604468	2.41749	0.00247485	1.59532	0.020225	1.83998	0.020857
TraesCS2B01G085100	Phosphoglycerate mutase family protein	2B	47519245	6.30536		1.80238	1.44e-14	1.44091	0.000202288	1.83979	4.35353e-09	2.17023	3.56112e-09
TraesCS6D01G181100	Cyclic nucleotide-gated ion channel, putative	6D	202964553	32.7667		1.79861	0.00539635			1.87452	0.0242234
TraesCS7D01G118200	Histone H3	7D	73116720	10.2623		1.79765	3.09e-34	1.80865	5.83567e-13	1.90226	3.84511e-19	1.94214	7.51026e-15
TraesCS1B01G399600	tRNA-2-methylthio-N(6)-dimethylallyladenosine synthase	1B	630699908	4.1062		1.79759	4.5e-15	1.70494	1.30203e-05	1.82423	1.41341e-08	1.88802	8.04716e-07
TraesCS4B01G611200LC	Transmembrane receptor	4B	669305707	7.17841		1.79752	7.12e-09	1.96902	0.000339122	1.73604	0.000135828	1.82297	0.000684547
TraesCS3B01G151600	Subtilisin-like protease	3B	143167855	17.6193		1.79682	3.28e-69	1.57972	1.0834e-19	1.80105	7.09287e-34	1.89292	1.23234e-27
TraesCS4B01G154900LC	Glyceraldehyde-3-phosphate dehydrogenase	4B	141028578	31.5494		1.79587	0.0218528					2.78566	0.0137749
TraesCS1A01G026600LC	Ubiquitin-like domain CTD phosphatase	1A	11060492	2.47031		1.79463	0.0015583			2.13823	0.00628191
TraesCS2B01G912800LC	Protein FAR1-RELATED SEQUENCE 5	2B	793149601	3.21829		1.79461	0.043307
TraesCS3B01G021100	Glycosyltransferase	3B	8812941	7.0083		1.78915	1.16e-19	1.74047	1.0914e-07	1.96062	7.26763e-13	1.78477	3.45954e-08
TraesCS3B01G063700	Non-specific lipid-transfer protein	3B	35701358	8.58232		1.78004	0.00625493			1.9767	0.0168367	2.05742	0.0357065
TraesCS2A01G002100LC	sequence-specific DNA binding transcription factor ATNDX	2A	955041	2.83861		1.77861	0.019975			2.11431	0.0394895
TraesCS7B01G056800LC	RAB GTPase homolog C2B	7B	34204492	10.7272		1.77852	0.00062612	1.83706	0.0289545	1.77232	0.00829286
TraesCS3B01G001400LC	ER lumen protein retaining receptor family protein	3B	984790	42.3494		1.77642	4.75e-15	1.72676	1.59912e-06	1.87497	7.08111e-10	1.72505	1.13374e-06
TraesCS1B01G044500LC	Disease resistance protein (NBS-LRR class) family	1B	22885225	3.80782		1.77565	5.29e-08	1.53618	0.00822017	1.66041	0.000295204	1.8948	0.000475097
TraesCS6B01G386500	Serine incorporator	6B	661340336	181.206		1.77432	2.09e-68	1.64407	1.01357e-23	1.81377	4.914e-37	1.87095	5.70828e-31
TraesCS5D01G041000LC	Glycosyl hydrolases family 32 protein	5D	26263377	14.2385		1.77311	0.0419506
TraesCS2B01G573100	calcium-dependent kinase-like protein	2B	762705773	26.9878		1.7723	0.000835072			1.74691	0.00861869	3.08615	2.31745e-05			2.03542	0.00704116
TraesCS4A01G676300LC	Acyl-CoA synthetase family member 4	4A	719054827	6.65436		1.7696	0.00226126	2.0373	0.0332825	1.68795	0.0307812
TraesCS2B01G464100	Kinase, putative	2B	657850285	42.5437		1.76751	0.0317859					2.53595	0.0376586
TraesCS5A01G089800LC	basic helix-loop-helix (bHLH) DNA-binding superfamily protein	5A	59028367	4.46745		1.76166	0.0159944			2.0987	0.028859
TraesCS5A01G708900LC	F-box/RNI-like superfamily protein	5A	690955134	17.4961		1.76163	9.84e-41	1.66739	3.73812e-16	1.72998	4.80002e-23	1.81044	6.13586e-19
TraesCSU01G050000	Receptor-like protein kinase	Un	39601644	112.95		1.75568	0.0494069
TraesCS7A01G484500	Tesmin/TSO1-like CXC domain-containing protein	7A	675495210	5.96078		1.75307	8.54e-24	1.80041	2.00889e-11	1.60855	5.56986e-13	1.95517	2.63326e-13
TraesCS4B01G028800LC	ubiquitin-protein ligase 4	4B	19014935	2.33977		1.75196	0.0123168			2.02304	0.015072
TraesCS6B01G120600	beta glucosidase 43	6B	115698525	3.13403		1.74339	5.9e-05			2.17556	9.30403e-05	1.42927	0.0408728
TraesCS4A01G308600	Cytochrome P450 family protein, expressed	4A	602248668	3.12347		1.74153	0.000444726			1.79193	0.009438
TraesCS2B01G019000LC	Retrovirus-related Pol polyprotein from transposon TNT 1-94	2B	9860930	4.53155		1.74062	0.00290939			1.91287	0.00842425
TraesCS5B01G769700LC	Transposable element protein, putative, Retrotrans_gag	5B	693804418	1.86552		1.73864	2.27e-12	1.78977	6.82045e-05	1.74613	8.14951e-07	1.34875	0.00192355
TraesCS5A01G709000LC	FBD-associated F-box protein	5A	690956601	4.35489		1.73155	1.01e-22	1.68731	1.30679e-09	1.76517	1.50063e-14	1.96865	1.88742e-12
TraesCS6A01G035000	Histone H2B	6A	16705367	67.9683		1.72973	0.0093188			1.78996	0.0321115	2.75801	0.00281051
TraesCS3B01G536000	F-box family protein	3B	776028755	11.3684		1.72452	2.16e-10	1.36489	0.00219438	2.20642	2.1355e-10	1.24144	0.00401609
TraesCS2B01G615700	Peroxidase	2B	793456344	21.8734		1.71251	3.16e-05	2.77367	3.40529e-06	1.53603	0.00426519	2.11885	0.000501553	-1.23765	0.0237806
TraesCS3B01G552800	Non specific phospholipase C	3B	787478590	11.3615		1.70364	2.96e-05	1.61133	0.0177199	1.85648	0.000485313	1.46544	0.0248272
TraesCS7B01G648700LC	Tetratricopeptide repeat (TPR)-like superfamily protein	7B	652168593	3.10098		1.70232	0.00291874			1.68789	0.0161467	2.96912	0.000227914
TraesCS7D01G377500	E3 ubiquitin-protein ligase RGLG2	7D	488784278	2.64618		1.70187	3.46e-08	1.62086	0.00303807	1.79731	3.02045e-05	1.69146	0.00120008
TraesCS6D01G374300	Protein phosphatase 2C family protein	6D	458764122	9.42797		1.6996	0.00712496			1.81579	0.0295027
TraesCS3B01G101500	Monocopper oxidase-like protein SKU5	3B	68442259	1.99119		1.69715	0.00363102			1.7271	0.0290384	1.91794	0.0421357
TraesCS7B01G063100	Inositol-tetrakisphosphate 1-kinase	7B	67818473	2.59766		1.69704	2.56e-13	1.58654	0.000169636	1.34353	7.08584e-05	1.51657	0.00022797
TraesCS5A01G358600	Cleavage and polyadenylation specificity factor subunit 3	5A	561108627	16.2522		1.69597	8.37e-28	1.37636	1.2167e-07	1.90412	1.62045e-18	1.76606	2.61865e-12
TraesCS2B01G238200	Syntaxin	2B	239506937	47.6759		1.69339	2.19e-18	1.28057	7.83418e-05	1.73637	4.60834e-11	1.99157	2.7735e-11
TraesCS3B01G364100LC	Pentatricopeptide repeat-containing protein	3B	357691850	3.90593		1.69301	8.8e-08	2.33595	5.90428e-06	1.54578	0.0003549	1.55891	0.00263875
TraesCS2A01G478100	Linalool synthase, chloroplastic	2A	717137852	7.32044		1.69297	0.000209566			2.09605	0.000296038
TraesCS7B01G002500	Disease resistance protein (TIR-NBS-LRR class) family	7B	1033398	19.156		1.69034	0.00691612			2.06169	0.00885813
TraesCS1B01G021000LC	Receptor-like protein kinase	1B	10085277	1.69707		1.68991	0.000567401			2.51068	4.17426e-06	2.73026	3.60021e-05	1.48135	0.0112561	1.70093	0.0237311
TraesCS7B01G080300	MADS box transcription factor	7B	90189438	2.16129		1.68382	0.00644927			1.81007	0.0225345
TraesCS2B01G431600	Peroxisome biogenesis protein 19-2	2B	620634311	2.93666		1.68352	0.0235741					2.48628	0.020249
TraesCS3B01G313300LC	Signal peptide peptidase-like 2B	3B	279752528	5.05158		1.68297	0.0300075
TraesCS6B01G191600	Regulator of chromosome condensation (RCC1) family protein	6B	225868997	8.39482		1.68063	1.4e-16	1.89659	5.03957e-09	1.61472	5.496e-09	1.30494	8.33949e-05
TraesCS3D01G170600LC	pseudo-response regulator 9	3D	116149818	2.76984		1.68039	3.37e-07	1.43593	0.0107934	1.61062	0.000227687	1.38534	0.00975358
TraesCS3B01G004200	Subtilisin-like protease	3B	2484566	4.68121		1.67858	2.13e-12	1.55519	0.000104354	1.8092	2.84463e-08	1.33187	0.000768401
TraesCS3B01G220100	Oligoribonuclease	3B	267430504	3.79951		1.67164	6.7e-07	2.14492	0.000121306	1.56946	0.000721129	2.04208	0.000183695
TraesCS1A01G028400	NBS-LRR-like resistance protein	1A	13314119	2.90664		1.67134	0.00150375			2.20041	0.00071771
TraesCS7B01G569000LC	SBP (S-ribonuclease-binding protein) family protein, putative	7B	595166549	6.92176		1.66852	4.44e-08	1.88778	7.57513e-05	1.7956	5.73809e-06	1.46147	0.0022081
TraesCS3B01G302100	U3 small nucleolar ribonucleoprotein protein imp4, putative	3B	485689558	390.029		1.66158	1.9e-06			1.79423	4.8822e-05	2.53341	2.47491e-07			1.51775	0.00268093
TraesCS2B01G913800LC	SAC3/GANP/Nin1/mts3/eIF-3 p25 family	2B	793456396	19.1779		1.6574	0.00015721	2.69049	2.41535e-05	1.48951	0.00910493	2.02194	0.00177918	-1.20098	0.0427132
TraesCS2A01G226600	D-aminoacyl-tRNA deacylase	2A	235354141	4.00116		1.65734	0.0142388			2.78377	0.00076111
TraesCS2B01G490000	BEACH-DOMAIN HOMOLOG A1	2B	687333891	24.3164		1.65711	0.00436864	2.38155	0.00609035	1.84514	0.0107741
TraesCS3B01G280300LC	Elongator complex protein 2	3B	228499036	5.38424		1.65411	0.0426153
TraesCS7B01G394400	Histone H2B	7B	661913109	14.9189		1.65312	1.44e-25	1.71282	2.02752e-11	1.51721	4.0767e-12	1.7989	1.04265e-12
TraesCS1A01G028500	NBS-LRR-like resistance protein	1A	13347389	24.7144		1.65261	2.16e-05			1.72068	0.0012813	2.40527	6.91092e-05			1.39158	0.0360133
TraesCS4B01G213500LC	Zinc finger CCCH domain-containing protein 27	4B	222965564	1.77743		1.65219	0.0337994			2.06976	0.0484958
TraesCS3A01G388600LC	Succinate--CoA ligase [ADP-forming] subunit beta	3A	482717531	11.7143		1.64778	0.0163796			1.92577	0.0300738
TraesCS2B01G078900	Ribulose bisphosphate carboxylase small chain	2B	44190499	51.722		1.63955	8.86e-08	1.80529	0.000123327	1.37358	0.000651772	2.44342	2.68868e-08					1.06984	0.0378149
TraesCS3A01G055600LC	Serine/Threonine-kinase ATM-like protein	3A	27728521	25.0957		1.63926	0.0149181	2.34243	0.024565	1.94588	0.0228997
TraesCS5A01G709100LC	Diacylglycerol kinase gamma	5A	690956716	4.12761		1.63895	6.74e-22	1.69854	1.33753e-10	1.66441	1.35566e-14	1.87004	1.64447e-12
TraesCSU01G237900	Non-specific lipid-transfer protein	Un	352901440	40.6792		1.62994	0.00075629			1.83864	0.00284908	1.56215	0.037565
TraesCS1B01G216800LC	Serine/threonine-protein kinase	1B	159396305	3.6226		1.62951	5.79e-12	1.86085	9.66836e-08	2.00997	4.2533e-12	2.14188	5.2843e-10
TraesCS6B01G705400LC	Early response to dehydration 15-like protein	6B	663678695	2.29929		1.62491	0.000654339			1.29564	0.0256373	2.03438	0.00231958			1.4588	0.0493165
TraesCS1D01G403900	RING/U-box superfamily protein	1D	468748586	2.72428		1.62341	1.36e-16	1.60911	1.76537e-06	1.87146	7.14411e-12	1.43753	1.48051e-05
TraesCS2D01G348700	Chitinase	2D	446640620	2.21356		1.62248	1.61e-07	1.72906	0.000546504	1.78128	8.71735e-06	1.94243	5.77349e-05
TraesCS3B01G234000	PITH domain-containing protein 1	3B	364538949	59.7312		1.62053	0.0247406
TraesCS6A01G103800	F-box domain containing protein	6A	73063580	10.0547		1.6162	2.18e-07	1.12929	0.0298674	1.70681	1.57781e-05	2.09378	4.57509e-06
TraesCS2A01G017500	Acetyltransferase component of pyruvate dehydrogenase complex	2A	8174082	1.69666		1.61428	0.0274963	2.4724	0.0357369	2.07763	0.0270508
TraesCS1B01G429900	Phytoene synthase	1B	654382471	4.32125		1.61289	0.0132999			1.82874	0.027734
TraesCSU01G066300	Thionin	Un	51345283	8.41742		1.61271	0.00138215					1.56206	0.0466959
TraesCS6B01G121200	sulfatase and phosphatidylinositolglycan class N domain-containing protein	6B	116120149	14.5932		1.61161	1.36e-07	1.61508	0.00104773	2.05746	1.9695e-07	1.29898	0.00775829
TraesCS6B01G425700LC	Transposon Ty3-G Gag-Pol polyprotein	6B	387093038	2.36137		1.61074	1.32e-05	1.67731	0.0048163	1.5742	0.000803036
TraesCS6B01G369700	DNA (Cytosine-5-)-methyltransferase	6B	643259757	17.4096		1.61012	1.6e-15	1.83937	2.39453e-08	1.69253	2.22746e-09	1.58451	1.73822e-06
TraesCS7B01G425600	Methyltransferase-like	7B	694362088	2.80312		1.6066	4.6e-11	1.65846	6.62467e-05	1.59613	1.90186e-06	1.78229	1.21319e-05
TraesCS6B01G102000	Late embryogenesis abundant protein	6B	79955250	2.49421		1.60624	0.0265862
TraesCS2A01G022300	Myrcene synthase, chloroplastic	2A	10734404	2.39119		1.60521	0.00375793	1.82412	0.0499469	1.54467	0.0379343
TraesCS6A01G081800	Cytochrome P450	6A	50407879	40.5562		1.59753	4.28e-06			2.2529	8.84535e-08	1.35661	0.0094907	1.24286	0.00291606
TraesCS2A01G071900	Receptor-like protein kinase	2A	31970512	4.56041		1.5934	2.88e-05	1.31855	0.0389984	2.22777	3.66188e-06	1.60481	0.00636273
TraesCS6A01G001400LC	Protein disulfide-isomerase	6A	677194	44.7676		1.5918	0.0292315			1.94488	0.0414364
TraesCS3B01G174100	RNA-binding protein 47A	3B	175090366	128.739		1.59004	9.16e-10	2.31631	3.35331e-10	1.22332	0.000305713	1.75592	3.51181e-06	-1.09299	0.000438189
TraesCS2B01G615800	Peroxidase	2B	793504879	45.1303		1.58925	9.86e-11	2.26603	1.67816e-09	1.50084	8.51344e-06	1.84949	1.27336e-06
TraesCS6A01G613700LC	Caffeic acid O-methyltransferase	6A	614252008	3.02623		1.58908	0.00853014	2.68862	0.00456046	1.63359	0.0413025
TraesCS5A01G027200	EEIG1/EHBP1 N-terminal domain-containing protein	5A	22715165	55.7602		1.58894	2.65e-54	1.61703	1.10016e-21	1.59283	3.32932e-27	1.34112	4.20985e-15
TraesCS6B01G129000	Nuclear ribonuclease Z	6B	124631901	7.94862		1.58486	0.00586083	2.62839	0.00244995
TraesCS5D01G526000	F-box protein	5D	543856549	8.7516		1.57927	0.0124474
TraesCS2B01G501400	Linalool synthase, chloroplastic	2B	696668268	87.3405		1.57342	3.02e-06			1.81789	1.87403e-05	1.75207	0.000452463
TraesCS3D01G185700	Ankyrin repeat protein-like	3D	171124777	8.22971		1.57306	0.000986779			1.93761	0.00100385	1.76189	0.013035
TraesCS5B01G006500	Lipoxygenase	5B	7706076	4.1564		1.57191	4.69e-05	1.832	0.00469941	1.27908	0.0175218	2.22353	0.000271436
TraesCS1A01G070500	Aminotransferase-related family protein	1A	53436193	3.90227		1.57019	3.97e-13	1.6553	8.53997e-06	1.77881	5.8044e-09	1.41161	0.000130771
TraesCS3B01G064100	Non-specific lipid-transfer protein	3B	35773297	13.7746		1.57016	8.8e-05			1.7778	0.000483185	1.69733	0.00512408
TraesCS1A01G119100	3'-N-debenzoyl-2'-deoxytaxol N-benzoyltransferase	1A	129003619	22.3222		1.56867	1.07e-26	1.27881	1.1628e-07	1.54145	2.8874e-14	1.54195	4.37535e-11
TraesCS6D01G397600	F-box family protein	6D	469371104	6.77643		1.56576	4.69e-16	1.08699	0.000438406	1.83501	6.59913e-14	1.94112	2.63358e-11
TraesCS1B01G114900LC	Protein FAR1-RELATED SEQUENCE 5	1B	60121702	2.76878		1.56513	0.00895035			1.95758	0.0128752
TraesCS3B01G752600LC	E3 ubiquitin-protein ligase BRE1-like 2	3B	756108621	3.89723		1.55647	0.0268195
TraesCS7B01G353100	Peroxidase	7B	610478458	11.6883		1.55139	6.55e-21	1.09391	2.9735e-05	1.64627	9.11848e-15	1.62605	7.61773e-11
TraesCS3A01G420100	Endo-1,31,4-beta-D-glucanase	3A	661831465	2.3471		1.55138	1.53e-05	2.01434	0.000260559	1.34229	0.00271603	1.65341	0.00206027
TraesCS3B01G000700	1-deoxy-D-xylulose 5-phosphate reductoisomerase	3B	981834	124.76		1.54091	2.13e-15	1.54498	5.53846e-07	1.62075	7.00258e-10	1.51122	7.26366e-07
TraesCS2B01G084200	Glycerol-3-phosphate dehydrogenase	2B	47167044	62.8328		1.53468	5.63e-06	1.47807	0.00783206	1.72734	8.58399e-05
TraesCS6B01G581400LC	Ubiquitin family protein	6B	560621358	9.20127		1.53058	3.86e-08	1.70942	0.000134189	1.62421	1.24042e-05	1.1796	0.00956123
TraesCS2A01G003300LC	1-phosphatidylinositol 4,5-bisphosphate phosphodiesterase beta-2	2A	1364427	3.62326		1.52901	0.00104339			1.51126	0.0139976	1.67203	0.0218506
TraesCS6A01G316200	Heat-shock protein, putative	6A	552757780	24.7937		1.52733	5.85e-08			1.63822	3.96773e-06	1.41268	0.000845284
TraesCS5B01G568800LC	Histone-lysine N-methyltransferase ASHR1 isoform 1	5B	556790714	5.39602		1.52638	0.000176406			2.00771	8.02452e-05	1.39189	0.0279127
TraesCSU01G158800	Receptor-like kinase	Un	222088198	24.912		1.52545	0.00395267
TraesCS6A01G130500LC	Elongation factor Ts	6A	68982224	7.34795		1.52198	0.00189645			1.79792	0.00251161	2.32166	0.000751886
TraesCS2B01G902500LC	F-box protein	2B	788636832	1.89514		1.51968	0.0254359	2.57526	0.0109217
TraesCS6B01G005800	Myosin light chain kinase, smooth muscle	6B	4173953	28.554		1.51904	5.45e-09	1.64459	0.000201278	1.08324	0.00480862	1.51642	0.000486108
TraesCS4B01G009100	Helicase-like protein	4B	5932191	8.74885		1.51597	1.19e-05	1.26471	0.0266442	1.69696	0.000106356	1.39747	0.0085489
TraesCS6B01G010000	DAG, chloroplastic	6B	6166196	19.2615		1.51591	0.000182618	2.40774	4.74492e-05	1.28676	0.0156058	1.4997	0.0150414	-1.12098	0.0399867
TraesCS5A01G550200LC	Gag-pol polyprotein	5A	593167577	5.34654		1.51566	2.53e-08	1.66652	0.00015329	1.40534	0.000117442	1.67071	9.76839e-05
TraesCSU01G117800LC	Thioredoxin domain-containing protein 9-like protein	Un	64151452	2.78714		1.51051	0.000113032	2.4943	4.32217e-05	1.38783	0.00658355					-1.50712	0.0282886
TraesCS6D01G174400	Poly(A) polymerase	6D	163830612	56.169		1.50628	3.17e-05	1.31385	0.0273733	1.54935	0.000840578	1.37863	0.0135013
TraesCS6B01G652400LC	GPI-anchored adhesin-like protein	6B	630596886	6.65764		1.50402	4.2e-06	1.59222	0.00314858	1.47385	0.00071622	1.71361	0.000815501
TraesCS2B01G655000LC	Vacuolar-processing enzyme	2B	616504526	8.94962		1.5002	0.0244416			1.80889	0.0258376	2.32699	0.0123545
TraesCS1D01G277900LC	Retrotransposon protein, putative, unclassified	1D	253184185	3.79943		1.49933	0.00268523			1.49277	0.0178074	2.22739	0.00203982
TraesCS7A01G300700LC	Transposase	7A	206573762	7.90644		1.49771	0.000324646			1.69148	0.000990982	2.21248	0.00019325			1.36703	0.0365344
TraesCS3B01G555800LC	COBRA-like protein	3B	582277256	3.57656		1.49621	0.00101911			1.95791	0.000677684
TraesCS3B01G063600	Non-specific lipid-transfer protein	3B	35697734	11.2364		1.49532	0.00170786			1.61581	0.00887524	1.51957	0.0408797
TraesCSU01G096500LC	Chlorophyll a-b binding protein, chloroplastic	Un	49381679	2.23305		1.49399	0.000100449	2.3067	0.000188789	1.97465	6.04724e-05	1.2641	0.0412245
TraesCS5A01G172300LC	translocon at the outer envelope membrane of chloroplasts 159	5A	180340245	5.69359		1.49258	8.64e-09	1.55574	0.000269038	1.20814	0.000643957	1.86743	5.27522e-06
TraesCS7A01G601000LC	zinc finger MYM-type-like protein	7A	616999223	7.15133		1.48958	1.21e-05	2.07177	0.000124541	1.43579	0.00175331	1.31415	0.0177049
TraesCS7A01G462400	SAC3/GANP/Nin1/mts3/eIF-3 p25 family	7A	658929745	70.1856		1.48934	0.00255737			1.75225	0.00414918
TraesCS4A01G428200	Receptor-like protein kinase	4A	698933405	5.33682		1.48888	0.0283999					2.01002	0.0366143
TraesCS6A01G353700LC	Class II aminoacyl-tRNA and biotin synthetases superfamily protein	6A	360516088	5.28449		1.48796	0.00500183			1.66227	0.00905576	3.03195	2.68898e-05			2.22918	0.00275781
TraesCS4D01G096800	Ankyrin repeat protein-like	4D	73383346	3.8677		1.48792	2.98e-12	1.359	9.62245e-05	1.69686	1.63146e-09	1.42567	2.71774e-05
TraesCS2B01G165500	SKP1-like 7	2B	137620510	7.33096		1.48341	0.00362927			1.67053	0.00526119	3.20322	1.71066e-06			2.43409	0.000264588
TraesCS6A01G132900	T-box transcription factor TBX6	6A	105168154	1.9979		1.48187	0.0171888			1.9109	0.00642027	2.47208	0.00330766			1.93438	0.0357163
TraesCS3B01G578900LC	70 kDa heat shock protein	3B	616309230	1.21166		1.48043	0.020009			2.00612	0.0162908
TraesCSU01G075200	basic helix-loop-helix (bHLH) DNA-binding superfamily protein	Un	67357493	3.60009		1.47493	0.00140217	2.61997	0.000182002	1.29404	0.0322138	1.45259	0.0420434
TraesCS3B01G313400LC	O-fucosyltransferase-like protein	3B	279753606	28.3513		1.47441	0.0102982			1.55453	0.045058
TraesCS6A01G508700LC	12-oxophytodienoate reductase-like protein	6A	556531467	56.5383		1.47312	4.3e-09	1.68433	2.09921e-06	1.17449	0.000172834	1.15785	0.00166875
TraesCS3B01G779800LC	Calcium-transporting ATPase	3B	769468794	6.09989		1.47194	0.00681168			1.66892	0.0195407
TraesCS2A01G002400	Zinc finger family protein	2A	1364421	3.68383		1.47156	0.00286537			1.38631	0.039904	1.59778	0.0442052
TraesCS1B01G552100LC	lectin protein kinase family protein	1B	544608077	5.63847		1.47147	1.35e-06	1.42338	0.00474408	1.56121	9.28775e-05	1.0895	0.0285181
TraesCS6B01G381500	Deoxyuridine 5'-triphosphate nucleotidohydrolase	6B	656484185	10.9164		1.47104	2.74e-17	1.5986	2.8844e-08	1.64223	1.30696e-11	1.34833	3.15197e-06
TraesCS3A01G405200	Heat shock transcription factor	3A	649818933	6.36216		1.46957	1.07e-16	1.29148	3.13329e-05	1.48242	5.08334e-09	1.25121	3.9918e-05
TraesCS7A01G371800	tRNA-2-methylthio-N(6)-dimethylallyladenosine synthase	7A	545543404	3.74196		1.46885	7.9e-06			2.11793	2.65359e-08	1.3505	0.00376696	1.39786	0.000231034
TraesCS6B01G203800	N-alpha-acetyltransferase	6B	250792824	3.98647		1.46682	0.000497121	1.53265	0.0313933	1.91114	0.000476081
TraesCS3A01G615900LC	Respiratory burst oxidase-like protein	3A	697747755	6.41528		1.46575	1.39e-14	1.03929	0.00158672	1.57084	1.19395e-09	1.47946	1.59762e-06
TraesCSU01G066000	Pectin lyase-like superfamily protein	Un	51233914	5.97978		1.46545	9.73e-08	1.85328	1.36969e-05	1.54553	1.47937e-05	1.56191	0.000229979
TraesCS7B01G346500	Lipid transfer protein	7B	602300345	2.57962		1.46431	1.5e-07	1.18768	0.0142849			1.10883	0.0165555
TraesCS7B01G432700	FAR1-related sequence 7	7B	700541673	2.00574		1.4636	0.0142232					2.17271	0.00974794
TraesCS3B01G251400	StAR-related lipid transfer protein	3B	402460555	6.78707		1.46101	2.17e-09	2.1746	6.52476e-09	1.23657	0.000132055	1.44094	0.000150906
TraesCSU01G156100	Receptor-like protein kinase	Un	214328191	5.98666		1.45998	0.00255973			1.68962	0.008295
TraesCS7B01G208300LC	Phosphomannomutase	7B	159182145	1.50617		1.45767	0.00472465
TraesCS1B01G263600	Pyrimidine-specific ribonucleoside hydrolase	1B	464129216	3.52428		1.45542	0.000155405			1.71286	0.000536292	1.95601	0.000937084
TraesCS2D01G018800	calcium-dependent lipid-binding family protein	2D	8888643	254.446		1.4544	2.32e-14	1.30639	2.4751e-05	1.36713	1.61793e-07	1.37863	4.65722e-06
TraesCS4B01G078600	Fumarylacetoacetate hydrolase, putative	4B	75736640	4.36571		1.4522	3.96e-17	1.37063	3.64333e-06	1.39653	7.26366e-09	1.62573	2.86238e-08
TraesCS5B01G014600	Serine/threonine-protein kinase	5B	13773602	3.28929		1.44988	0.0141565			1.68641	0.0170489	2.78389	0.000594151
TraesCS5D01G525900	F-box protein	5D	543838346	12.129		1.44955	0.0154545			1.72441	0.0294874
TraesCS4B01G024700	tetratricopeptide repeat (TPR)-containing protein	4B	17491424	5.41753		1.44758	1.42e-22	1.59288	2.91766e-10	1.54735	1.3654e-13	1.54259	6.87967e-10
TraesCS7B01G432700LC	PHD finger protein 6	7B	456121973	6.49511		1.44586	0.000401647			1.53443	0.00422244
TraesCS2D01G074800	IAA-amino acid hydrolase ILR1	2D	32028133	2.28288		1.44376	6.59e-05			1.68188	0.000799233
TraesCS1D01G111800	Serine/threonine-protein kinase	1D	107195086	5.1643		1.44249	1.57e-14	1.59209	1.67081e-08	1.83837	4.79364e-15	1.85136	3.98401e-11
TraesCS3A01G599400LC	Steroid hormone receptor ERR2	3A	690881997	7.91888		1.4424	1.76e-06	1.4484	0.00363482	1.47431	0.000224621	1.44047	0.00246633
TraesCS2B01G218700LC	Protein FAR1-RELATED SEQUENCE 5	2B	132059657	2.59335		1.44012	0.0138911					2.5622	0.0021288
TraesCS6A01G218100LC	BAG family molecular chaperone regulator 7	6A	142478628	32.2309		1.43853	0.0427876			1.86338	0.0311038	2.45874	0.0120966
TraesCS3B01G196700	Polynucleotidyl transferase ribonuclease H-like superfamily protein	3B	223557832	24.4729		1.43851	7.18e-35	1.37434	1.58535e-12	1.56031	5.13985e-21	1.45494	4.03994e-14
TraesCS7B01G017200	Phosphatidic acid phosphatase (PAP2) family protein	7B	14900069	57.2051		1.43577	0.000128261	1.86957	0.00200982	1.50079	0.00300069
TraesCS2A01G007300	ATP synthase E chain	2A	3111971	53.5633		1.43452	0.0181484
TraesCS3A01G132200	Protein transport sec20	3A	108918714	23.9067		1.43286	0.00200845			1.47429	0.0186975	1.98562	0.00513838
TraesCS5A01G172200LC	Auxin response factor	5A	180339767	9.02747		1.43196	3.78e-11	1.50887	2.08255e-05	1.27341	1.97544e-05	1.94847	1.15223e-08
TraesCS2B01G168100	Bifunctional glutamine synthetase adenylyltransferase/adenylyl-removing enzyme	2B	140851843	5.11366		1.43013	0.0236379					3.28724	9.19229e-05			2.54704	0.00299502
TraesCS7A01G452900	Peroxidase	7A	646477434	11.3383		1.42885	1.55e-20	1.00564	1.70949e-05	1.69348	4.94892e-19	1.7171	2.82213e-14
TraesCS7B01G037400	Cytochrome P450	7B	36472381	4.40921		1.42585	8.06e-07			1.35177	0.000323741	1.31173	0.00378079
TraesCS5B01G007400LC	Receptor-like protein kinase	5B	6876159	6.03358		1.41643	0.0287633					2.78732	0.00169592
TraesCS6B01G188500	26S protease regulatory subunit	6B	217155346	35.4814		1.41559	9.67e-51	1.41852	3.01668e-18	1.34999	1.02938e-21	1.30895	9.56925e-16
TraesCS2A01G131900	Phosphoribulokinase	2A	79206555	27.8278		1.41498	4.53e-21	1.07826	1.0476e-05	1.54236	1.32709e-14	1.31134	2.22011e-08
TraesCS2B01G186800LC	PHD finger protein-like protein	2B	104792456	5.92717		1.41475	0.0449053					2.18023	0.0258138
TraesCS1B01G401400	Short-chain dehydrogenase/reductase	1B	631822127	17.4787		1.413	0.000148772	1.91577	0.000597915	1.07485	0.0296071	1.99943	0.000193566
TraesCS6A01G454300LC	histone-lysine N-methyltransferase SUVR5	6A	501169149	61.4698		1.41282	2e-06	1.25414	0.0152764	1.53063	0.000152501	1.54005	0.00118976
TraesCS2B01G621200	Ribosomal protein L30/L7 family protein	2B	795305565	1.3087		1.41248	0.0484621			1.97102	0.0296529
TraesCS1D01G020800	Mechanosensitive ion channel family protein	1D	8919895	3.82468		1.41205	7.21e-06	1.2061	0.0254109	1.71873	3.05984e-05	1.09806	0.0338605
TraesCS2B01G186700LC	Glutamyl-tRNA(Gln) amidotransferase subunit B, chloroplastic/mitochondrial	2B	104791947	6.00542		1.41197	0.0464352					2.12927	0.0310949
TraesCS1B01G183700	UPF0415 protein C7orf25	1B	330501850	7.59439		1.41109	1.36e-11			1.73127	1.17018e-10	1.40327	1.28849e-05
TraesCS1D01G130200	Peroxidase	1D	143361846	14.1146		1.40926	1.89e-17					1.05908	2.89011e-05
TraesCS1A01G039100	B3 domain-containing protein	1A	21281531	37.1495		1.40732	8.89e-19	1.06016	3.71582e-05	1.54059	1.48635e-13	1.6858	1.60774e-12
TraesCS4B01G248600LC	Orotidine 5'-phosphate decarboxylase	4B	274680124	3.61782		1.40689	0.00013157			1.69928	0.00014356	2.08612	8.63305e-05	1.09313	0.0207644	1.47997	0.00911785
TraesCS2D01G576900	HXXXD-type acyl-transferase family protein	2D	640240669	25.0336		1.40643	5.01e-08	1.00429	0.0182847	1.62599	5.34833e-07	1.74373	3.14531e-06
TraesCS5B01G372100LC	Copper-transporting ATPase	5B	405709263	4.54773		1.40427	0.0313744	2.04813	0.0493751
TraesCS2B01G168200	Gibberellin receptor GID1A	2B	140852056	5.08994		1.40382	0.0297885					3.09916	0.000312882			2.41111	0.0064738
TraesCS1B01G417500	V-type ATP synthase beta chain	1B	641922598	4.64898		1.40306	4.34e-06	1.493	0.00294115	1.41844	0.000411603	1.62872	0.00064431
TraesCS2A01G147000	AP2/B3-like transcriptional factor family protein	2A	93401997	42.2412		1.40283	1.61e-10	1.11562	0.00232426	1.69759	3.19833e-09	1.17409	0.000750657
TraesCS1B01G011900	Copper ion-binding protein, putative	1B	5759561	6.17822		1.40076	1.31e-17	1.10687	5.00382e-05	1.51106	7.61495e-12	1.52711	6.33755e-09
TraesCS1D01G018000	Receptor-like kinase	1D	7899691	18.3059		1.4005	7.69e-18	1.37455	1.165e-08	1.88975	1.09209e-20	1.64116	3.03786e-12
TraesCS4D01G010500	Signal peptide peptidase-like protein	4D	4973668	3.7272		1.4003	0.0401379
TraesCS1B01G449100	Transcription factor radialis-like protein	1B	667930684	8.40822		1.39688	1.43e-12	1.42857	1.45846e-05	1.4016	3.22337e-07	1.22486	0.00018887
TraesCS2B01G140300	CONSTANS-like zinc finger protein	2B	106954442	23.7527		1.39644	0.000607707			1.5735	0.00138815	2.50496	5.0036e-06	1.04036	0.0435746	1.97182	0.000212212
TraesCS7A01G381200	E3 ubiquitin-protein ligase RGLG2	7A	556161900	2.70496		1.39508	3.52e-06	1.31073	0.00926358	1.40537	0.000357026	1.90858	5.04374e-05
TraesCS2B01G089000	Ubiquitin thioesterase	2B	50286964	14.3364		1.39371	2.06e-10	1.54161	5.41542e-06	1.26805	1.20346e-05	1.80303	3.94782e-08
TraesCS6B01G581500LC	methyl-CPG-binding domain 11	6B	560625084	5.77109		1.39311	5.58e-06	1.63468	0.000960514	1.44173	0.000349984
TraesCS1B01G172300	HCO3- transporter family	1B	307381480	3.30544		1.39201	7.3e-05					-1.72568	0.0252664			-3.24914	9.31297e-07	-2.83063	4.09564e-08
TraesCS6B01G232500LC	glutamate receptor 3.4	6B	157791581	2.54618		1.38836	0.00246215			1.25007	0.040283	1.9559	0.00513977
TraesCS1A01G095400	Phosphate import ATP-binding protein PstB 1	1A	91102650	4.0761		1.38789	1.51e-13	1.09007	0.000634129	1.45248	9.81675e-09	1.43836	2.48305e-06
TraesCS6A01G082000	Cytochrome P450	6A	50864498	8.9438		1.38763	0.0274623			2.13029	0.00499259
TraesCS2D01G590900	Disease resistance protein (NBS-LRR class) family	2D	646568095	1.72066		1.38579	0.0467612	2.98462	0.00532249	2.08775	0.0160439
TraesCS1B01G390100	F-box protein	1B	623769155	8.79676		1.38325	0.0198331
TraesCS6A01G508800LC	12-oxophytodienoate reductase 1	6A	556532035	52.2627		1.38305	1.03e-07	1.67518	3.33052e-06	1.12263	0.000415951	1.0244	0.00699571
TraesCS2B01G083800	Lactoylglutathione lyase	2B	46876920	58.7325		1.38188	1.94e-15	1.45708	1.18516e-07	1.50035	1.75142e-10	1.1843	2.28475e-05
TraesCS5A01G704400LC	Plasma membrane ATPase	5A	688978427	6.24663		1.38165	0.0140224					1.8433	0.023521
TraesCS2B01G007600	NBS-LRR disease resistance protein, putative, expressed	2B	4644214	11.2829		1.37965	0.00192083			1.35859	0.021529
TraesCS3B01G362300LC	weak chloroplast movement under blue light protein (DUF827)	3B	355507298	3.01199		1.37698	4.14e-05	2.17144	3.80841e-05	1.30038	0.00305349	1.13872	0.0346488
TraesCS5A01G030900LC	branched-chain amino acid transaminase 1	5A	18696724	3.13855		1.3753	0.023619			1.6467	0.0472426
TraesCSU01G048900	Disease resistance protein (CC-NBS-LRR class) family	Un	39186208	3.92069		1.37332	2.36e-08	1.69109	2.04206e-05	1.39834	1.89663e-05	1.49229	0.000139299
TraesCS2B01G733500LC	Cysteine--tRNA ligase	2B	685820047	2.06495		1.37323	0.0164596	2.41981	0.00444063	1.46704	0.0360752
TraesCS1D01G197400LC	AAR2 protein family	1D	170218503	16.1626		1.37274	0.0041951			1.3314	0.0385906	1.59881	0.0313351
TraesCS6B01G145100	Kinetochore protein nuf2, putative	6B	144961508	22.2576		1.37065	1.38e-34	1.46195	3.15161e-14	1.46449	6.13455e-19	1.41756	1.28997e-13
TraesCS7B01G432800	Rotundifolia-like protein	7B	700551451	2.09521		1.37018	0.0378485
TraesCS2B01G162100	Myb/SANT-like DNA-binding domain protein	2B	135004470	8.8544		1.3678	8.73e-05	1.17615	0.0430463	1.45956	0.00107251	1.9926	0.000103852
TraesCS5D01G398000	Nitrate transporter 1.2	5D	464415849	4.74019		1.36753	7.86e-05	1.26394	0.0373314	1.17418	0.0149687	1.80483	0.00106034
TraesCS1D01G073300	transcription factor, putative (Protein of unknown function, DUF547)	1D	54337338	18.3058		1.36694	1.4e-26	1.15677	2.40726e-09	1.55825	1.10416e-21	1.66074	3.6646e-18
TraesCS2B01G236600	Cellulose synthase-like protein	2B	236881375	1.56519		1.36059	0.00529518			1.412	0.0250469	2.08536	0.005229
TraesCSU01G045500	Receptor-like protein kinase	Un	35689237	10.8684		1.35762	1.59e-06	1.62184	0.000382851	1.2032	0.00175331	1.33515	0.00311481
TraesCS5A01G583700LC	Succinyl-diaminopimelate desuccinylase	5A	614220748	7.75193		1.35638	0.000325505			1.37651	0.00517617	1.94083	0.00056717
TraesCS5B01G423700	Stress up-regulated Nod 19 protein	5B	600054196	11.2613		1.35552	0.00102925			1.75468	0.000884145	1.76765	0.00476624	1.35369	0.00909786	1.36666	0.0393501
TraesCS2A01G253300	Cyclin-H1-1	2A	385332322	3.78142		1.35459	0.0440711	2.16047	0.0473509
TraesCS1B01G673900LC	arginine-glutamic acid dipeptide repeat protein	1B	630700804	2.45741		1.35371	4.35e-07	1.23571	0.00768602	1.499	3.10639e-05	1.289	0.00339599
TraesCS6A01G619700LC	zinc finger MYM-type-like protein	6A	616123635	8.88431		1.35309	1.24e-07	2.05459	3.57683e-08	1.26879	9.56318e-05	1.62513	1.54142e-05
TraesCS6A01G411900	Protein kinase family protein	6A	613969468	21.9685		1.35231	0.000648413	1.71155	0.00686465
TraesCS3D01G520000	Tryptophan synthase beta chain	3D	602455008	14.5345		1.35106	3.22e-10	1.60653	1.3251e-06	1.23498	1.6555e-05	1.59394	1.14937e-06
TraesCS6B01G458500LC	Histone deacetylase, putative	6B	422964799	18.2538		1.35033	1.72e-25	1.18396	5.21472e-09	1.52386	3.9652e-19	1.67219	4.36088e-17
TraesCS3B01G468000	MYND type zinc finger protein	3B	711883317	5.88403		1.34605	0.0153926			1.55502	0.0243274	2.65937	0.000601934			1.95766	0.0168462
AML47755	Leucyl-tRNA synthase	3B	8220000	78.6395		1.34337	1.1e-14	1.45335	2.79477e-08	1.42426	2.7026e-10	1.25649	1.94074e-06
TraesCS5A01G582800LC	Tryptophan aminotransferase-related protein 4	5A	613542567	11.1855		1.34316	5.34e-11			1.6855	6.13942e-11	1.21513	9.62484e-05
TraesCS7A01G432800	Replication protein A subunit	7A	626877117	1.36157		1.33704	0.00262393	2.04716	0.0101541	1.30291	0.03886
TraesCS1A01G294700	3-isopropylmalate dehydratase large subunit	1A	489600056	17.6785		1.33614	3.33e-08			1.47957	8.11434e-07	1.88289	3.34088e-08			1.06357	0.0034377
TraesCS6D01G401900	ATP-dependent RNA helicase	6D	470680307	120.384		1.33456	5.72e-29	1.15979	1.4442e-10	1.55158	4.348e-24	1.15153	1.19443e-10
TraesCS2B01G031100	Myrcene synthase, chloroplastic	2B	14404447	6.03952		1.33442	0.004463			1.2215	0.0456363
TraesCS4A01G352100LC	Retrotransposon protein, putative, Ty3-gypsy subclass	4A	509666723	8.78758		1.33285	1.4e-13	1.28529	1.01552e-05	1.51599	2.61302e-10	1.43316	4.29897e-07
TraesCS6D01G397800	Gibberellin-regulated family protein	6D	469391148	12.9798		1.33015	3.37e-07			1.64881	1.78509e-07	1.30975	0.000556716	1.02952	0.00080993
TraesCS2A01G589300	Endoplasmic reticulum metallopeptidase 1	2A	778122361	8.96452		1.32986	0.00710502			2.04891	0.000430756	2.23804	0.00102337
TraesCS6B01G103600	F-box family protein	6B	82004507	16.2693		1.32942	8.87e-15	1.64079	1.353e-10	1.17801	1.24048e-07	1.45992	9.7052e-09
TraesCS3B01G580900	DNA topoisomerase 2	3B	809625785	1.56062		1.32932	0.0247157	2.42626	0.00969258
TraesCS5A01G697400LC	Oxysterol-binding protein	5A	685743376	11.4159		1.32726	0.00387356			1.7207	0.00161716	1.71655	0.00811041	1.19985	0.0338335
TraesCSU01G653200LC	NBS-LRR disease resistance protein-like protein	Un	462394954	1.98316		1.32586	0.0110724			1.70331	0.0189162
TraesCS1A01G018500	Receptor-like kinase	1A	9549075	13.2275		1.3228	1.43e-07	1.13572	0.00695623	1.57375	1.67377e-06	1.52486	7.70496e-05
TraesCS5B01G753000LC	wall-associated receptor kinase carboxy-terminal protein	5B	687394140	2.85586		1.31941	0.000569635	1.60332	0.0134386	1.38535	0.00747149	1.24451	0.0499215
TraesCS6B01G116900	Upstream activation factor subunit spp27	6B	106467327	9.39029		1.31926	1.12e-09	1.47699	1.44326e-05	1.31078	4.5048e-06	1.11145	0.00122458
TraesCS1A01G107500	Fasciclin-like arabinogalactan protein	1A	105885702	39.1089		1.31785	2.81e-11	1.27343	5.0223e-05	1.33712	3.52067e-07	1.35871	8.14542e-06
TraesCSU01G030400	2-oxoglutarate (2OG) and Fe(II)-dependent oxygenase superfamily protein, putative	Un	28781503	3.84988		1.31784	0.0279052
TraesCS3B01G011300LC	Cytidylate kinase	3B	5199348	37.7772		1.31671	0.000124655	1.57627	0.00379522	1.3013	0.0039112	1.15437	0.0346055
TraesCS6B01G258100	IKI3 family protein	6B	463396017	8.04461		1.31585	2.78e-08	1.85325	1.75506e-07	1.50743	6.0892e-07	1.1533	0.00160415
TraesCS5A01G503900	Late embryogenesis abundant protein	5A	669584343	36.3833		1.31504	4.98e-12	1.56252	1.12669e-07	1.34579	1.40668e-07	1.46546	5.73536e-07
TraesCS7A01G770000LC	Coatomer subunit beta'-1	7A	717396452	39.6643		1.31503	0.0190847
TraesCS3B01G312800LC	Retrotransposon protein, putative, Ty1-copia subclass	3B	279662297	39.9431		1.31502	1.59e-05	1.10977	0.0229545
TraesCS4A01G308700	2-oxoglutarate (2OG) and Fe(II)-dependent oxygenase superfamily protein	4A	602259911	21.7304		1.31467	3.17e-10	1.32439	0.000439696	1.3564	1.16166e-05	1.26602	0.000556599
TraesCS4B01G006200	Sn1-specific diacylglycerol lipase alpha	4B	3902813	8.11597		1.31025	3.38e-09	1.50115	1.4551e-05	1.42498	8.53968e-07	1.4092	3.71892e-05
TraesCS5B01G552400	Sec14p-like phosphatidylinositol transfer family protein	5B	703227014	14.2647		1.30712	4.03e-08			1.48279	1.07e-06	1.59065	6.88137e-06
TraesCS5B01G757300LC	Leucine--tRNA ligase	5B	689175786	2.24221		1.30662	0.0193678					2.30088	0.00725931
TraesCS7A01G500100	Myrcene synthase, chloroplastic	7A	690202536	1.99667		1.30271	0.021896			1.52651	0.0375297
TraesCS1A01G050000LC	Actin depolymerizing factor	1A	20977040	105.234		1.29596	3.99e-19	1.21942	5.25455e-07	1.33515	9.04685e-11	1.42263	1.34183e-09
TraesCS3B01G102800	Pyrimidine-specific ribonucleoside hydrolase	3B	69603487	25.3204		1.29152	1.45e-23	1.27928	3.81426e-10	1.49176	7.47775e-18	1.10006	8.2621e-08
TraesCS6B01G364500	DNA-directed RNA polymerase subunit	6B	636381720	10.7938		1.29146	0.0114656			1.42328	0.0338729
TraesCS7D01G091800	F-box family protein	7D	55005825	4.61945		1.2903	3.36e-07	1.21773	0.00617758	1.43391	3.86628e-05
TraesCS6D01G400800	U-box domain-containing protein 62	6D	470319425	15.4033		1.28993	2.95e-25	1.22878	1.35731e-10	1.47924	4.4983e-20	1.36094	5.68069e-13
TraesCS6B01G229000LC	Zinc finger BED domain-containing protein DAYSLEEPER	6B	155543636	3.31373		1.28993	0.00136424			1.23908	0.0137235	1.9033	0.00111564
TraesCS4A01G368600	Mannan endo-1,4-beta-mannosidase 4	4A	641381911	4.78627		1.28979	4.64e-14	1.58984	2.53472e-08	1.18025	5.1393e-07	1.41773	5.00879e-07
TraesCS4A01G392600	Early nodulin 93	4A	668351786	2.38284		1.28833	0.00254282	1.63928	0.0217868
TraesCS6B01G346400LC	Retrotransposon protein, putative, Ty3-gypsy subclass	6B	275802897	6.35245		1.2878	0.0022045	1.97639	0.00200447			1.54578	0.014185
TraesCS2A01G013100	Defensin	2A	5290646	6.8196		1.28778	0.000153186			1.22522	0.00783855
TraesCS7B01G424300	F-box family protein	7B	693254623	6.43779		1.2871	6.31e-09	1.49379	1.06693e-05	1.29486	5.02372e-06	1.05671	0.00208119
TraesCS3B01G298400LC	Synaptic vesicle 2-related protein	3B	254466208	3.36218		1.28644	3.61e-12	1.38671	1.86468e-05	1.38989	1.10266e-07	1.49907	2.58557e-06
TraesCS1D01G157000LC	Tryptophan aminotransferase related 2	1D	111006910	6.4681		1.2817	4.23e-11	1.0747	0.00104848	1.65112	1.66936e-10	1.46592	2.11615e-06
TraesCS4B01G262400LC	Transposon protein, putative, Mutator sub-class	4B	301866148	6.77974		1.28015	0.0300075
TraesCS1A01G023700	Phloem protein 2-like protein	1A	11643653	2.85536		1.27823	3.4e-05	1.29956	0.0131606	1.24237	0.00249464	1.33278	0.00721291
TraesCS6A01G017800LC	RNA-directed DNA polymerase (reverse transcriptase)-related family protein	6A	7251717	3.23846		1.27506	0.000244818			1.67942	8.71852e-05
TraesCS2A01G500800	3-phosphoshikimate 1-carboxyvinyltransferase	2A	729540712	1.16681		1.27482	0.0242489			1.7297	0.0137945	1.79658	0.0365854
TraesCS1B01G115400LC	Protein FAR1-RELATED SEQUENCE 5	1B	60356741	4.11439		1.2747	2.64e-05	1.6324	0.000844791	1.57701	6.43842e-05	1.04302	0.0352062
TraesCS3B01G010300	Cell division cycle protein 123 like	3B	4780519	2.54992		1.27264	0.0237466
TraesCSU01G128400	Germin-like protein	Un	110270018	1.62485		1.27173	0.0225384	1.80278	0.0273334	1.51765	0.0203676	1.74797	0.0241876
TraesCS3B01G023400	F-box family protein	3B	10045661	5.0758		1.26972	5.23e-05	1.80096	0.000229472	1.24071	0.00254223	1.23367	0.0122716
TraesCS2A01G035500	Glyoxylate reductase/hydroxypyruvate reductase	2A	15407719	2.49382		1.2628	0.0184299
TraesCS1B01G409100	Cysteine protease	1B	636725518	3.36799		1.26128	0.006868			1.47624	0.0141392
TraesCS2B01G083900	CW7 protein, putative	2B	46882383	28.3081		1.26028	9.03e-12	1.22579	3.75534e-05	1.38582	1.97808e-08	1.02504	0.000582371
TraesCS3B01G011600	WAT1-related protein	3B	5199155	47.6059		1.25919	4.68e-05	1.48391	0.00240286	1.2756	0.00159097	1.10042	0.0246562
TraesCS5B01G777700LC	Monothiol glutaredoxin	5B	697509311	3.316		1.25735	0.0197724
TraesCS7B01G294100LC	Cellulose synthase	7B	263733024	3.41353		1.25671	0.00794587			1.28853	0.0383506
TraesCS3D01G143000LC	Ankyrin repeat protein-like	3D	85237524	5.13827		1.2567	0.00227203			1.14789	0.0288456	2.39735	3.88767e-05
TraesCS7A01G172600LC	Retrovirus-related Pol polyprotein LINE-1	7A	81921239	13.2872		1.25533	0.0017424	1.8695	0.00295036	1.09291	0.0462018
TraesCS1A01G086300	Cyclic nucleotide-gated channel	1A	73092589	2.82222		1.25524	0.0168669			1.66917	0.0112564
TraesCS3B01G539600	Dirigent protein	3B	778793184	25.0021		1.25443	0.000264797			1.58333	8.71852e-05	1.94882	2.59597e-05	1.05518	0.00865247	1.42067	0.00232664
TraesCS7A01G172500LC	Retrotransposon protein, putative, unclassified	7A	81919563	14.0452		1.25418	0.00212421	1.70487	0.00928234
TraesCS3D01G517300	Abscisic stress ripening protein	3D	600594345	9.82285		1.25241	1.69e-08			1.41407	2.72154e-07	1.53974	1.62016e-06
TraesCS2B01G085900LC	Vacuolar protein sorting-associated protein 54, chloroplastic	2B	41197242	7.40428		1.25165	1.25e-05	1.63418	0.000430081	1.23747	0.00140259	1.62123	0.000313729
TraesCS5A01G172400LC	Disease resistance protein (TIR-NBS-LRR class) family	5A	180344167	3.68831		1.24881	3.03e-06	1.27851	0.00435184	1.10838	0.00201666	1.75023	3.34592e-05
TraesCS2A01G007500	Major Facilitator Superfamily protein, expressed	2A	3333156	127.936		1.24872	0.0115647			1.36935	0.0356205
TraesCS6D01G089100	Nucellin-like aspartic protease	6D	54077529	64.0036		1.24794	3.41e-42	1.39677	1.84478e-21	1.21832	3.12854e-21	1.18666	1.1573e-15
TraesCS6B01G102900	Defensin-like protein	6B	80961360	3.2065		1.24508	1.32e-06	1.43272	0.00145319	1.2318	0.000615004	1.33683	0.00206305
TraesCS5A01G036000	Subtilisin-like protease	5A	33004361	32.2373		1.24352	3.15e-10	1.36628	1.63039e-05	1.36707	3.17976e-07	1.36111	1.21334e-05
TraesCS6B01G364700	Peroxisomal multifunctional enzyme type 2	6B	636472937	78.8289		1.24237	0.000287889	1.28706	0.0220276	1.40707	0.00149786
TraesCS2A01G016000	Protein PLANT CADMIUM RESISTANCE 2	2A	7328300	6.39783		1.24115	2.6e-09	1.46672	1.14577e-05	1.1211	5.73916e-05	1.28362	0.000106656
TraesCS6B01G228900LC	proline-rich spliceosome-associated (PSP) family protein	6B	155542538	4.62201		1.24105	0.00522563			1.24671	0.0234552	1.7791	0.00481203
TraesCS7B01G276100LC	pleiotropic drug resistance 5	7B	246676233	5.04432		1.24011	0.0272464
TraesCS6B01G009200LC	Glycine-rich protein	6B	4163342	17.077		1.23985	2.45e-06	1.32093	0.00456927			1.10092	0.0157073
TraesCS7B01G048800	Calcineurin-like metallo-phosphoesterase superfamily protein	7B	48761914	16.9793		1.23976	5.4e-08	1.04018	0.00696466	1.39069	4.04164e-06	1.2227	0.000670816
TraesCS6B01G214400	Tetraspanin family protein	6B	289782031	6.15082		1.23944	0.00127705	1.57142	0.0138726	1.15045	0.0292229
TraesCS6B01G258200	Flavonoid 3',5'-hydroxylase	6B	463402282	3.72224		1.23863	0.00048094	1.39954	0.0149661	1.35519	0.00275091
TraesCS4B01G384400	Dipeptidyl peptidase	4B	663745192	13.2903		1.23753	2.06e-10	1.3578	1.19234e-05	1.3144	4.54864e-07	1.07242	0.00060559
TraesCS5B01G026800	F-box protein	5B	25993145	6.62206		1.23477	0.000147959	1.21926	0.0276106	1.34707	0.00181089
TraesCS7B01G338200	Copper transport protein family	7B	592624374	369.462		1.23361	2.3e-16			1.36646	2.58633e-12	1.04887	6.23955e-06
TraesCS7A01G234200	Myb/SANT-like DNA-binding domain protein	7A	206574455	103.31		1.23334	5.72e-05			1.39797	0.000219539	1.72014	6.89121e-05			1.08047	0.0182728
TraesCS6B01G050200LC	Retrovirus-related Pol polyprotein from transposon TNT 1-94	6B	22838927	9.95504		1.2309	0.0408007	1.84805	0.0448525
TraesCS2B01G164900	F-box protein	2B	136950254	4.78716		1.22964	0.000317531			1.36376	0.00120522	1.6399	0.000997774			1.11784	0.0429087
TraesCS7B01G755900LC	Kinase family protein	7B	711886659	5.50138		1.22481	0.00686173			1.47632	0.0103915
TraesCS6B01G112000LC	Phosphatase 2C family protein	6B	59414004	8.49405		1.22374	1.39e-18	1.26821	1.00787e-07	1.17795	3.70014e-09	1.10521	3.29983e-06
TraesCS5A01G428200	Aldehyde oxidase, putative	5A	613011646	94.0792		1.22364	3.18e-14			1.27519	2.77917e-09	1.50127	5.29586e-10
TraesCS2A01G334400LC	Transferase family	2A	356720812	4.06332		1.22223	0.000757052	1.24165	0.0462134	1.26808	0.00925535	1.30658	0.0251035
TraesCSU01G140700	Replication factor C subunit, putative	Un	134301144	12.9222		1.22216	0.000499319			1.32087	0.00446072	1.48558	0.00626555
TraesCS2B01G018000	DnaJ heat shock amino-terminal domain protein	2B	8276721	4.53609		1.22103	0.0447035
TraesCS2B01G611000	Soluble inorganic pyrophosphatase	2B	790583731	13.7812		1.22076	1.61e-05	1.77177	1.18449e-05			1.86254	2.42961e-06
TraesCS7D01G094100	F-box family protein	7D	56514849	4.79965		1.22072	0.00103105			1.20804	0.0174548	1.30574	0.030355
TraesCS3B01G073700	Low-temperature-induced 65 kDa-like protein	3B	44282749	18.9293		1.21461	9.96e-11	1.31319	2.03467e-05	1.29899	5.3141e-07	1.06818	0.000570559
TraesCS4A01G294300	Zinc transporter	4A	595661090	20.5349		1.2131	1.4e-08			1.43067	7.6714e-08	1.58438	2.33159e-07
TraesCS1A01G174400	ALG-2 interacting protein X	1A	311806705	2.80995		1.21202	0.0260401
TraesCS4A01G689100LC	Zinc finger MYM-type-like protein	4A	725568816	2.68505		1.21167	5.86e-07	1.06549	0.0101105	1.47793	3.718e-06	1.1222	0.00421457
TraesCS6B01G214500	Tetraspanin family protein	6B	289821195	4.8094		1.2103	0.000180149	1.36982	0.0168263	1.18483	0.00977002
TraesCS4D01G005600	2-oxoglutarate (2OG) and Fe(II)-dependent oxygenase superfamily protein	4D	3256287	76.1248		1.20929	1.44e-07			1.55693	1.02604e-07	1.22505	0.000468106
TraesCS1D01G029200	NBS-LRR-like resistance protein	1D	11493756	126.784		1.20824	0.0169659					2.15998	0.00279044
TraesCS1A01G051800	Protein aluminum sensitive 3	1A	33373635	3.31025		1.208	3.5e-10	1.17679	0.000391869	1.25905	1.95935e-06	1.14434	0.00038729
TraesCS1D01G040000	Inorganic pyrophosphatase family protein	1D	19186620	37.6619		1.20787	2.11e-23			1.2219	1.48373e-15	1.41587	9.02577e-16
TraesCS2B01G583600	Pyruvate decarboxylase	2B	770765276	19.7695		1.20549	0.0433753			1.40864	0.046818	2.59274	0.000744088			2.23664	0.00299502
TraesCS5A01G532000	Apyrase	5A	689916253	2.13755		1.20546	0.00251982			1.94965	5.03466e-05	1.70771	0.00366744	1.22197	0.0199197
TraesCS7B01G038800	Retrotransposon protein, putative, unclassified	7B	37844712	6.32583		1.2045	1.28e-06			1.26337	9.03286e-05	1.15291	0.00301905
TraesCS7B01G032300	Protein DETOXIFICATION	7B	32408246	3.63052		1.20375	2.81e-08			1.37156	1.77251e-06	1.22664	0.000449351
TraesCS7A01G432900	Receptor-like kinase	7A	626882576	9.3964		1.20348	1.25e-09	1.24791	0.000146237	1.33276	7.57929e-07	1.2723	6.8669e-05
TraesCS2B01G594400	Endoplasmic reticulum metallopeptidase 1	2B	779070565	10.7176		1.20279	0.00593899			1.86174	0.000402203	1.50142	0.019384
TraesCS1B01G251500	Cation/H(+) antiporter	1B	444057313	3.08335		1.20244	0.000600589			1.25648	0.00863434
TraesCS1A01G010300	MICOS complex subunit Mic25	1A	6332191	3.16032		1.20231	0.012664			1.55118	0.0146242
TraesCS4A01G333600	Sec14p-like phosphatidylinositol transfer family protein	4A	617042465	32.8351		1.2017	0.00703497			1.54533	0.0051646
TraesCS3A01G126000	Alpha/beta-Hydrolases superfamily protein	3A	101776592	2.58208		1.20062	0.0468504
TraesCS7D01G015200	F-box protein	7D	6582128	4.2657		1.1984	9.79e-05			1.22572	0.00251501	1.92565	4.64177e-05			1.24431	0.0176979
TraesCS6A01G003600LC	Transposon protein, putative, Mutator sub-class	6A	1650967	1.52451		1.19795	0.01939
TraesCS5B01G532700LC	(2Z,6E)-farnesyl diphosphate synthase	5B	533978187	44.216		1.1964	0.00728015			1.20456	0.0433854
TraesCS3B01G221600	CRS2-associated factor 1, chloroplastic	3B	276479202	10.859		1.1944	3.8e-10	1.56091	1.48189e-07	1.10826	1.63356e-05	1.17079	0.000106656
TraesCS5A01G018000LC	transcription regulator NOT2/NOT3/NOT5 family protein	5A	10040146	4.04344		1.19352	1.78e-08			1.31761	5.25598e-06	1.17787	0.000805108
TraesCS7A01G176100LC	Transposable element protein, putative, Retrotrans_gag	7A	84264663	12.7349		1.1913	0.0388883	1.82058	0.0417789
TraesCS6B01G156700	F-box domain containing protein, expressed	6B	159368060	23.4382		1.19058	4.59e-17			1.21926	4.91582e-11	1.41353	3.20951e-11
TraesCS6B01G355700	1-aminocyclopropane-1-carboxylate oxidase	6B	624017272	11.7445		1.18831	2.58e-12	1.25759	6.70735e-06	1.20742	2.71652e-07	1.18486	1.81018e-05
TraesCS2D01G457100	F-box domain containing protein, expressed	2D	564685159	6.01981		1.18708	2.49e-16					1.15393	1.09754e-06
TraesCS3B01G196400	GDSL esterase/lipase	3B	223035396	38.9889		1.18662	3.15e-24			1.12995	2.13593e-12
TraesCS6B01G188600LC	Retrotransposon protein, putative, Ty1-copia subclass	6B	123743211	3.4672		1.18576	0.041602
TraesCS6B01G232700LC	Gag polyprotein	6B	157861182	7.33932		1.18501	0.00539368			1.2325	0.0218278	1.65923	0.00688608
TraesCS2A01G007200	Cytomatrix protein-like protein	2A	3106368	14.569		1.18333	0.0330699
TraesCS3B01G247500LC	PIF1-like helicase	3B	190890740	5.22674		1.18148	2.19e-10	1.15615	0.000140298	1.43455	4.36458e-09
TraesCS6A01G407500LC	BAG family molecular chaperone regulator 7	6A	441723610	31.9827		1.1814	0.0250936			1.42895	0.0241956	2.63042	0.000132352			2.33058	0.000380684
TraesCS3B01G275200LC	mevalonate kinase	3B	223032632	6.86335		1.1778	5.14e-21	1.09704	2.94913e-07	1.20591	9.21685e-12	1.24321	3.58332e-09
TraesCS6A01G040500	Histone H2B	6A	21137210	15.072		1.17682	0.0486465
TraesCS5A01G428900	Protein kinase	5A	613539449	32.0454		1.17483	4.2e-11			1.4413	1.60335e-10
TraesCS6A01G003700LC	Transposon protein, putative, Mutator sub-class	6A	1652417	1.49009		1.17341	0.0344496
TraesCS2B01G629200	CAA30371.1 protein	2B	800254377	1.96287		1.17055	0.00560874	2.08909	0.00204347
TraesCS6B01G112100LC	P-loop containing nucleoside triphosphate hydrolases superfamily protein	6B	59416096	8.87002		1.17038	3.39e-17	1.14946	4.97394e-07	1.21198	1.74903e-10	1.16553	2.34481e-07
TraesCS6A01G119700	Polyubiquitin	6A	91422758	227.36		1.169	2.52e-05			1.25457	0.000307412	1.50583	0.000159485
TraesCS7A01G172700LC	Endonuclease/exonuclease/phosphatase family protein	7A	81923066	6.75567		1.16881	0.00296567	1.42043	0.03137	1.09661	0.0435903
TraesCS2B01G527900	Sec14p-like phosphatidylinositol transfer family protein	2B	722329542	3.95119		1.16787	3.85e-09	1.07513	0.00148145	1.20797	6.22337e-06	1.01465	0.00186784
TraesCS2B01G111000	Dipeptidyl-peptidase, putative	2B	72811060	8.88973		1.16746	0.000369621	1.40335	0.00686235			1.48493	0.0024823
TraesCS2B01G802100LC	Isoaspartyl peptidase/L-asparaginase	2B	734048609	117.65		1.16368	4.82e-05	1.307	0.00487013	1.04615	0.00681622	1.14189	0.0114447
TraesCS1D01G017700	Receptor-like kinase	1D	7874304	52.6926		1.16265	1.19e-24	1.13579	1.88461e-10	1.35211	4.98803e-19	1.45014	7.13816e-17
TraesCS6A01G289200LC	BAG family molecular chaperone regulator 7	6A	238104815	26.4316		1.1612	0.033048			1.56982	0.0136934	2.42077	0.00065561	1.59092	0.00736179	2.44187	0.00022422
TraesCS6B01G312900	Chlorophyll a-b binding protein, chloroplastic	6B	560624872	4.66739		1.16096	3.42e-05	1.47768	0.00104848	1.18017	0.00130311
TraesCS6B01G373800	Chaperone protein dnaJ	6B	646707089	58.4968		1.15977	2.27e-11			1.23284	3.84629e-08	1.33633	1.8728e-07
TraesCS1A01G371400LC	Retrotransposon protein, putative, unclassified	1A	414628984	2.37476		1.15932	0.00241106			1.8021	0.000158395			1.198	0.0192449
TraesCS5D01G409100LC	Plasma membrane ATPase 1	5D	419385590	9.96598		1.15877	8.63e-27	1.24899	5.48098e-11	1.22752	1.10165e-14	1.0491	2.99241e-08
TraesCS3B01G145700	Ankyrin repeat protein-like	3B	134966713	40.3706		1.15703	7.66e-10	1.59392	2.31983e-08	1.14181	6.13602e-06	1.03777	0.000519715
TraesCS3B01G299500LC	Wd repeat-containing protein 27-like	3B	255703390	5.86441		1.15566	5.99e-07	1.29234	0.000796859	1.20309	0.000118218	1.33014	0.000339453
TraesCS6B01G223200LC	LINE-1 reverse transcriptase like	6B	151161208	5.61884		1.15458	3.59e-07	1.15748	0.00120198	1.26952	8.9639e-06	1.59969	2.0553e-06
TraesCS1B01G181400	DNA topoisomerase family	1B	328104650	25.1693		1.15405	2.71e-07			1.2889	1.05167e-05	1.46819	1.31437e-05
TraesCS3A01G704900LC	F-box protein (DUF295)	3A	735341745	2.09779		1.15351	0.00222674	1.52385	0.0188716	1.11301	0.0320745
TraesCS3B01G014300	Expansin protein	3B	6117535	32.5405		1.15185	1.72e-06	1.75226	2.14336e-07	1.21006	4.92009e-05
TraesCS2A01G012100LC	Transport protein sec24-like protein	2A	4837848	9.09863		1.15103	6.04e-07			1.14895	0.000168863	1.54087	1.2305e-05
TraesCS7B01G704900LC	Aldehyde oxidase	7B	687417656	108.979		1.14409	1.55e-06	1.06381	0.00666221	1.13477	0.000299079	1.34611	0.000192625
TraesCS6A01G147000	Thiamine-phosphate synthase	6A	126911782	86.5546		1.1395	0.00567695			1.35613	0.00668783	1.96988	0.000442417	1.11951	0.0238062	1.73327	0.00136086
TraesCS2B01G007500	NBS-LRR disease resistance protein, putative	2B	4642753	4.64743		1.13783	0.00192083			1.01117	0.0377383
TraesCS6B01G455500	WD40/YVTN repeat and Bromo-WDR9-I-like domain-containing protein	6B	712268204	9.84307		1.13253	0.0165583			1.38991	0.0147174	2.80644	7.72195e-06			2.54287	1.69453e-05
TraesCS7B01G619500LC	23S rRNA (uracil(1939)-C(5))-methyltransferase RlmD	7B	632492018	50.6982		1.13237	0.00811222
TraesCS7A01G568700	Disease resistance protein (TIR-NBS-LRR class) family	7A	736424402	20.0882		1.13	0.0144923			1.30075	0.0277052
TraesCS5A01G268400	Cinnamoyl-CoA reductase 4	5A	479200117	24.2989		1.12964	9.45e-09	1.0947	0.000573597	1.22746	2.13905e-06	1.37067	4.44476e-06
TraesCS2B01G712600LC	Integration host factor subunit beta	2B	669231830	2.81507		1.12893	0.00403731	1.2956	0.0483856	1.15248	0.0268946	1.46289	0.0166114
TraesCS3A01G318500	Methylthioribulose-1-phosphate dehydratase	3A	559624952	22.7834		1.12815	5.86e-19			1.23522	1.32332e-15	1.32838	1.53091e-13
TraesCS3B01G532600LC	50S ribosomal protein L1	3B	558505288	9.12468		1.12803	2.57e-06	1.77969	8.57251e-07	1.14995	0.00021634	1.08653	0.0035375
TraesCSU01G112700	4-hydroxy-7-methoxy-3-oxo-3,4-dihydro-2H-1,4-benzoxazin-2-yl glucoside beta-D-glucosidase 1c, chloroplastic	Un	96548307	12.0789		1.12792	4.29e-05	1.67144	3.12317e-05	1.10741	0.00139411	1.08392	0.0087272
TraesCS1D01G172700	Ripening-related protein	1D	246679437	3.29703		1.12557	1.71e-05	1.18874	0.00205334
TraesCS6B01G155300	Leucine-rich repeat receptor-like protein kinase family protein	6B	158160910	4.15577		1.12236	0.0246016	1.65776	0.0399722
TraesCS4A01G462200	Pentatricopeptide repeat-containing protein	4A	726442153	5.10347		1.122	1.53e-11	1.00929	0.000232231	1.21922	3.23815e-08	1.18317	7.6821e-06
TraesCSU01G042800	Receptor-like protein kinase	Un	34653813	13.3091		1.12147	0.0226797			1.2609	0.0450408
TraesCS6A01G594400LC	DNA helicase homolog, putative	6A	607436044	5.41785		1.12108	0.0344034					1.70462	0.026366
TraesCS1D01G239500	Cation/H(+) antiporter	1D	329488154	6.6244		1.1205	1.15e-05			1.32384	3.03363e-05	1.5781	2.62701e-05
TraesCS7B01G285600	MLO-like protein	7B	519907988	2.46508		1.11949	0.00642953	1.43221	0.0390654	1.13433	0.0416605
TraesCS4A01G023300	Annexin	4A	16501474	5.8558		1.11851	2.08e-11			1.23554	2.62573e-08	1.30317	9.19306e-07
TraesCS1A01G138300	Cyclin family protein	1A	230469021	4.39323		1.1171	7.98e-11	1.04541	0.000771937	1.10732	8.03065e-06	1.02378	0.000666941
TraesCS5A01G503800	Late embryogenesis abundant protein	5A	669582357	12.4232		1.1153	4.05e-09	1.14289	0.000304819	1.16735	6.728e-06	1.13595	0.000219239
TraesCS3D01G234700	Transcriptional corepressor LEUNIG	3D	324304836	278.403		1.11408	4.74e-25			1.26555	2.54941e-19	1.24035	1.29098e-14
TraesCS1A01G028000LC	Jacalin-like lectin domain containing protein	1A	11532559	2.96904		1.1135	0.00224893	1.28508	0.028022	1.03615	0.0273384	1.81824	0.000812518
TraesCS7A01G553200	Kinesin-like	7A	725999866	9.28628		1.11156	2.02e-12	1.15747	8.32093e-06	1.06871	8.61739e-07	1.30522	2.46559e-07
TraesCS3B01G444400	F-box family protein	3B	684512649	2.99925		1.11046	0.00317984	1.38294	0.0173698			1.85097	0.000686639
TraesCS4B01G074100LC	cDNA clone:J013058P10, full insert sequence	4B	57256385	2.70552		1.10813	0.00178022	1.37605	0.0224675	1.17837	0.0140759
TraesCS4A01G381200	sphingoid base hydroxylase 2	4A	658897297	2.10333		1.10755	0.00267708			1.29918	0.00210328	1.65492	0.00098464
TraesCS1D01G049800	Ankyrin repeat protein-like	1D	30081080	13.0918		1.10398	2.2e-13	1.27978	1.35394e-07	1.08033	1.93745e-07	1.22748	3.38045e-07
TraesCS2B01G538800	Isoaspartyl peptidase/L-asparaginase	2B	734050488	104.203		1.10362	3.05e-05	1.21955	0.00502048	1.01397	0.00482413	1.04444	0.0137786
TraesCS6B01G214900	GATA transcription factor	6B	290627794	4.63839		1.10311	3.82e-07	1.52014	9.95908e-06	1.10783	9.62275e-05	1.00427	0.00361853
TraesCS2B01G660800LC	Seven transmembrane MLO family protein	2B	623525898	3.90124		1.10168	0.0160387	1.71705	0.0142849	1.30727	0.0221748
TraesCS6B01G177800	Kinase	6B	195805195	30.1945		1.10018	4.34e-06	1.01166	0.0123894	1.20379	0.000148276
TraesCS1B01G293100	Laccase	1B	510808364	30.245		1.09958	1.51e-06	1.03945	0.00560835	1.01672	0.000781012	1.32083	0.000137712
TraesCS4B01G208000	Laccase	4B	445228629	33.9654		1.09917	6.45e-05			1.26894	0.000341506	1.14296	0.00706768
TraesCS1A01G022600	Protein transport protein Sec61 subunit gamma	1A	11025584	2.92734		1.0982	0.0001386	1.30291	0.00718686	1.09823	0.00439974
TraesCS6A01G151400	Tryptophan--tRNA ligase	6A	135433119	8.50134		1.09781	0.0178609			1.23295	0.0473332	1.49684	0.0377194
TraesCS6B01G109300	Protein low psii accumulation 2, chloroplastic	6B	90102006	13.2257		1.09688	2e-10			1.28908	4.04061e-08	1.2822	3.30356e-06
TraesCS2B01G042600LC	S-adenosyl-L-methionine-dependent methyltransferases superfamily protein	2B	20359855	3.76151		1.09686	0.00103876
TraesCS7B01G660700LC	Vacuolar-sorting receptor	7B	660060972	15.679		1.0963	1.11e-20			1.21682	2.41424e-16	1.15089	3.65719e-11
TraesCS6B01G355300	N-acetyltransferase	6B	623442844	3.80258		1.09528	2.48e-06	1.09472	0.00967479	1.24965	0.000143119	1.23909	0.00188027
TraesCS1A01G047300	Cytochrome P450 family protein, expressed	1A	29241126	11.1695		1.09449	1.31e-09	1.05281	0.000205656	1.07488	4.18643e-06	1.36287	3.71697e-07
TraesCS7B01G467500	F-box protein	7B	724981138	5.53408		1.0938	0.00698021			1.06504	0.0445203	1.42346	0.0190168
TraesCS6A01G328000	P-loop containing nucleoside triphosphate hydrolases superfamily protein	6A	561449726	2.23645		1.09278	0.0363946
TraesCS3B01G023900	O-linked-mannose beta-1,4-N-acetylglucosaminyltransferase-like protein	3B	10231064	6.0658		1.09272	3.44e-06			1.03728	0.00108309	1.41426	0.000144808
TraesCS4B01G026700	Peptide transporter	4B	20278827	6.47679		1.0926	0.000100464	1.13792	0.012835	1.13775	0.00163156	1.4371	0.000715213
TraesCS1A01G102700	Glutathione S-transferase	1A	99018551	41.9141		1.08924	1.94e-09
TraesCS2B01G279900	MEI2-like 2	2B	386133396	10.0313		1.08715	9.07e-11	1.19936	1.89532e-05	1.14005	1.07689e-06	1.02079	0.000260245
TraesCS3B01G102900	AT2G31890-like protein	3B	69605985	33.6632		1.08649	8.57e-21	1.08884	8.08812e-09	1.32682	9.25999e-17
TraesCS2A01G369000	O-glucosyltransferase rumi	2A	612090736	3.09164		1.08617	3.86e-06			1.09116	0.000358948	1.78878	2.5831e-06			1.03417	0.0265253
TraesCS3A01G019400	Thioredoxin	3A	11800249	2.17162		1.08514	0.0455838
TraesCS3B01G555700LC	B-1,4-glucanase	3B	582276844	3.10255		1.0851	0.0128711
TraesCS3B01G153500	Arginine--tRNA ligase	3B	145898770	138.507		1.08375	6.68e-20			1.10841	8.59027e-12
TraesCS2D01G017300	Protein PLANT CADMIUM RESISTANCE 2	2D	8337205	31.5466		1.08346	1e-13			1.26576	1.94661e-12	1.32776	1.63816e-10
TraesCS3A01G020700LC	Receptor-like kinase	3A	11464104	5.1821		1.08162	0.000334027			1.33512	0.000379319	1.0352	0.0256401
TraesCS5D01G240300	Protein XRI1	5D	348492644	6.34091		1.08063	1.09e-10	1.30074	1.4272e-06	1.00024	8.84515e-06	1.0466	0.000102001
TraesCS6A01G185800LC	NagB/RpiA/CoA transferase-like superfamily protein	6A	108086400	3.90228		1.07876	0.00221085			1.20127	0.00367883	2.00034	3.78448e-05			1.70855	0.000479107
TraesCS2B01G660700LC	Polyadenylate-binding protein	2B	623522243	7.23752		1.07713	0.0395039	1.90419	0.0131606	1.39187	0.0290746					-1.5209	0.0494598
TraesCS6A01G325400	1-aminocyclopropane-1-carboxylate oxidase	6A	559001886	1115.46		1.07711	9.57e-06	1.40944	9.48416e-05	1.0298	0.000974496
TraesCS2B01G512900	Serine/threonine-protein kinase	2B	708198257	3.0247		1.07575	0.0165856
TraesCS2B01G003100	Sulfotransferase	2B	1764832	5.02641		1.07554	0.0186006	1.48722	0.0487334
TraesCS7D01G429000	Copper transport protein family	7D	549121989	475.044		1.07547	2.36e-14			1.20651	3.28933e-11
TraesCS5B01G332000LC	Bifunctional protein GlmU	5B	361487800	7.49443		1.07508	0.00447933			1.07455	0.0325021	1.53833	0.00683783
TraesCS6B01G169200LC	Toll-Interleukin-Resistance (TIR) domain family protein	6B	103574515	4.14834		1.07503	8.95e-07	1.21292	0.00125779	1.22666	4.00111e-05	1.0103	0.00576723
TraesCS5D01G436000LC	Receptor homology region, transmembrane domain- and RING domain-containing protein 1	5D	433013612	4.16549		1.07458	0.00658089			1.24917	0.0111005	1.24893	0.0350074
TraesCS6B01G247500	LETM1 and EF-hand domain-containing protein 1, mitochondrial	6B	440774689	85.8428		1.07367	0.00411658			1.16736	0.0149589	1.21066	0.0326194
TraesCS2B01G620600	BTB/POZ domain-containing protein TNFAIP1 isoform 1	2B	795045706	34.1383		1.07272	6.26e-06			1.03964	0.00110583	1.14306	0.00214147
TraesCS2D01G253600	N-acetyl-D-glucosamine kinase	2D	305913314	10.3869		1.07236	1.18e-21	1.13368	3.59559e-10	1.35791	2.22526e-19	1.34925	6.80931e-14
TraesCS5A01G367100	Receptor-like protein kinase	5A	567716233	2.80122		1.07052	0.0168602
TraesCS4D01G349300	Cysteine-rich receptor-kinase-like protein	4D	502425337	10.5379		1.0705	0.000335259
TraesCS6B01G459700LC	Peptidyl-tRNA hydrolase	6B	422992394	109.826		1.06662	1.82e-18			1.05724	1.60803e-10	1.23148	4.23551e-11
TraesCS1D01G003300	SNF1-related protein kinase regulatory subunit beta-2	1D	906799	7.89238		1.06655	0.0326431
TraesCS1D01G049200	CsAtPR5	1D	28818409	41.2105		1.0659	3.08e-08	1.29291	9.94303e-06	1.02133	5.18116e-05
TraesCS1D01G089600	Agmatine coumaroyltransferase-1	1D	75766017	3.03847		1.06436	5.66e-06	1.14259	0.00193793	1.44533	6.59778e-07	1.27456	0.000293913
TraesCS1B01G398200	Pentatricopeptide repeat-containing protein, putative	1B	629262794	4.05419		1.06383	2.8e-07	1.04279	0.00263979	1.24399	5.00032e-06
TraesCS3D01G286400	Acyl-[acyl-carrier-protein]--UDP-N-acetylglucosamine O-acyltransferase, putative	3D	395078612	78.4052		1.06351	7.92e-43	1.03612	2.12815e-14	1.06103	1.39886e-19	1.07991	9.56925e-16
TraesCS2A01G396300	Protein SPIRAL1	2A	649627879	33.0301		1.06202	2.83e-06			1.05779	0.00027602	1.11523	0.00109614
TraesCS1A01G031700	Pentatricopeptide repeat-containing protein	1A	14584884	3.14102		1.06192	0.00104814			1.06692	0.0117263	1.11841	0.0282758
TraesCSU01G152100LC	S-adenosylmethionine:tRNA ribosyltransferase-isomerase	Un	83253415	2.88922		1.0612	0.0353875
TraesCS5A01G499200	Expansin-like protein	5A	665982652	2.60905		1.06079	0.000184179	1.45812	0.00141408	1.05401	0.00395445
TraesCS1B01G401600	Oligopeptide transporter, putative	1B	631829399	22.6957		1.06019	1.23e-15	1.07524	8.90329e-07	1.03615	2.4108e-08	1.26699	2.38001e-09
TraesCS5A01G211600	Auxin repressed/dormancy associated protein	5A	426903698	74.7626		1.05956	4.52e-47	1.14716	2.38547e-21	1.02037	7.02003e-22	1.00379	2.0012e-16
TraesCS5A01G546700	Arsenate reductase	5A	700666391	19.3266		1.05944	3.72e-33			1.16754	3.13147e-22	1.15289	4.10235e-16
TraesCS2B01G583300	Vacuolar protein sorting-associated protein 41-like protein	2B	770679794	129.136		1.05896	2.64e-09	1.09363	6.04602e-05	1.13697	6.56889e-07
TraesCS3B01G009600	arabinogalactan protein 18	3B	4553316	67.3002		1.05834	7.24e-06			1.14656	0.000110985	1.38465	4.60868e-05
TraesCS6B01G154800	Malate synthase G	6B	158144661	13.6883		1.05732	0.0135558			1.08732	0.0468032	1.31913	0.0365979
TraesCS5A01G582700LC	Protein-L-isoaspartate O-methyltransferase	5A	613539952	5.24331		1.05695	2.56e-05			1.30885	7.2115e-05
TraesCS2B01G931900LC	transmembrane protein, putative (DUF594)	2B	799535393	3.50586		1.05692	0.0107537			1.19601	0.0245122	1.26816	0.046834
TraesCSU01G042100	disease resistance protein (TIR-NBS-LRR class)	Un	34234123	4.0195		1.05478	1.36e-05			1.08752	0.000743915	1.17677	0.00248582
TraesCSU01G012500	tRNA (Adenine(58)-N(1))-methyltransferase non-catalytic subunit trm6	Un	15905771	25.6639		1.05451	2.71e-22	1.18469	5.0266e-12	1.07397	3.27734e-13	1.01164	3.9131e-09
TraesCS1D01G202300	S-adenosyl-L-methionine-dependent methyltransferases superfamily protein	1D	285441421	159.339		1.0544	0.00157842			1.29445	0.00207317
TraesCS6B01G229100LC	BED zinc finger,hAT family dimerization domain	6B	155544847	4.46317		1.05427	0.0277147					1.57911	0.0227469
TraesCS7B01G418900	Aldehyde oxidase, putative	7B	687419611	131.973		1.05409	2.68e-05			1.09538	0.000868895	1.3228	0.000473341
TraesCS1B01G328200	DNA mismatch repair protein MutS	1B	554985581	17.2852		1.05333	0.0022483	2.1217	8.18533e-06			1.28194	0.00989714	-1.3352	0.000704981
TraesCS5B01G588900LC	Retrotransposon protein, putative, unclassified	5B	574682990	10.1563		1.05226	1.24e-09			1.20892	3.90797e-08	1.45987	1.47644e-08
TraesCS6D01G053200	F-box protein	6D	25639756	3.3655		1.05215	0.00020928			1.17901	0.00149954
TraesCS5B01G071000	tRNA(His) guanylyltransferase	5B	82236335	3.82808		1.05191	0.0244312
TraesCS2B01G225700LC	F-box protein	2B	137189829	5.31249		1.05052	2.38e-10			1.26272	5.2718e-09	1.17096	7.01975e-06
TraesCS2B01G025700LC	Alanyl-tRNA synthetase	2B	12014536	5.66354		1.05051	0.00230129
TraesCS2B01G115100	VQ motif-containing family protein	2B	78103380	2.41653		1.04944	0.0162977	1.51354	0.0198872
TraesCS3B01G302000LC	BED zinc finger,hAT family dimerization domain	3B	259143512	3.40603		1.04917	1.07e-06	1.04296	0.00374251	1.08685	0.00012351
TraesCS2B01G620700	Tubulin-folding cofactor B	2B	795048575	23.4674		1.0479	0.00103789			1.1593	0.00649919	1.32051	0.00769374
TraesCS2D01G140700	ARM repeat superfamily protein	2D	82891141	3.18872		1.04611	0.0279498					2.25668	0.000766096			1.6796	0.0222942
TraesCS2A01G210300	Cellulose synthase-like protein	2A	194421142	203.931		1.04603	2.32e-20			1.09025	4.09477e-15	1.0661	2.00248e-11
TraesCS6A01G294200	Potassium transporter	6A	526114469	23.2893		1.04448	2e-08	1.16944	3.98261e-06
TraesCS1A01G395900	IBR domain-containing protein	1A	561595857	6.12073		1.04404	9.09e-08			1.01577	0.000108903	1.05719	0.000793585
TraesCS1A01G194500LC	Retrovirus-related Pol polyprotein from transposon TNT 1-94	1A	167158273	3.491		1.04398	1.75e-05	1.17096	0.00413552	1.11966	0.000511124
TraesCS1D01G012900	Serine/threonine-protein kinase	1D	6718844	2.14894		1.04379	0.00144599			1.34256	0.000223109
TraesCS7D01G469500LC	Complement component 1 Q subcomponent-binding protein, mitochondrial	7D	446208219	1.74247		1.04331	0.0481092	1.74348	0.0374731	1.39553	0.0376037
TraesCS3B01G270600	Deoxyuridine 5'-triphosphate nucleotidohydrolase	3B	436375328	3.5976		1.04331	0.00318208			1.41687	0.00166732	1.45031	0.00764581	1.09702	0.0175016
TraesCS2B01G485100	Cytochrome P450	2B	682217664	2.59037		1.0431	0.0301853			1.6044	0.00448364
TraesCS2B01G567000	Serine/threonine-protein kinase	2B	758114829	7.73753		1.04252	0.000725666	1.08986	0.040891	1.55859	0.000112657	1.60961	0.000788199
TraesCS5D01G102700	Pathogenesis-related protein 1	5D	115974921	23.6843		1.03983	4.5e-09			1.0214	2.49055e-07	1.15684	3.18603e-07
TraesCS2A01G636100LC	Linalool synthase, chloroplastic	2A	717118927	3.44901		1.03909	0.0133281			1.60493	0.00125057			1.33897	0.00654422
TraesCS6A01G544100LC	zinc finger MYM-type-like protein	6A	579815591	7.39797		1.03848	1.05e-06	1.39194	3.3199e-05			1.1484	0.000585372
TraesCS1B01G418000	U-box domain-containing family protein	1B	642121420	10.3453		1.03327	0.00797655					1.3354	0.0192993
TraesCS1A01G008200	MICOS complex subunit Mic25	1A	4502604	3.76935		1.03254	2.75e-06			1.08349	0.00018987	1.03524	0.00333173
TraesCS1D01G112900	DUF4228 domain protein	1D	109454816	7.31552		1.03249	1.2e-10	1.02454	0.000108339	1.09528	3.90639e-07	1.10254	1.82112e-05
TraesCS7D01G004000	Terpene cyclase/mutase family member	7D	2235619	3.95674		1.03214	0.0161728			1.24439	0.0345252
TraesCS5A01G014700	Ribonuclease H-like superfamily protein	5A	10036710	3.73922		1.03033	1.83e-07			1.16525	1.77139e-05	1.16496	0.000432477
TraesCS6B01G274500	ethylene-responsive transcription factor	6B	495805959	3.42899		1.03015	2.64e-08			1.17844	3.49456e-06	1.02526	0.00100901
TraesCS5A01G535200	Transcription factor protein	5A	691994925	5.12239		1.03014	0.0243047
TraesCS1A01G065500LC	CsAtPR5	1A	29872913	13.2375		1.02998	0.032183	1.82139	0.0173829
TraesCSU01G064400LC	E3 ubiquitin-protein ligase	Un	34623989	4.8567		1.02923	0.00157842	1.12378	0.0358688	1.07353	0.0110525
TraesCS1D01G157100LC	Tryptophan aminotransferase	1D	111015163	7.48332		1.0291	7.37e-14	1.09762	5.16537e-06	1.23568	3.63923e-10	1.15926	9.7855e-07
TraesCS3B01G236500	Receptor-like protein kinase	3B	369102629	8.71218		1.02902	2.84e-07	1.28666	5.30423e-05
TraesCS3A01G047900	Acyl-CoA thioesterase, putative	3A	25387810	37.0312		1.02873	0.00567873			1.24478	0.00669726	1.3623	0.0111727
TraesCS1B01G466400	Disease resistance protein	1B	676810198	6.43703		1.02823	5.36e-06			1.02236	0.000532541	1.1903	0.000654102
TraesCS2B01G168500	Gibberellin receptor GID1A	2B	141282452	3.60234		1.02805	0.00322658			1.04374	0.0323737	1.56613	0.00496992
TraesCS1A01G118200	Gamma-aminobutyric acid receptor subunit gamma-2	1A	126853150	10.9611		1.02705	5.15e-15			1.12517	3.23895e-11	1.24747	4.90109e-10
TraesCS5D01G347000	F-box and associated interaction domains-containing protein	5D	433011311	5.11821		1.02686	0.00903077			1.12465	0.023997
TraesCS2D01G539900	Heavy metal transport/detoxification superfamily protein	2D	620005658	7.9608		1.02566	0.0040237	1.61552	0.00350012	1.04286	0.0259976
TraesCS2B01G167600	Pre-mRNA-splicing factor SYF1	2B	140763359	88.283		1.02399	4.59e-07					1.62793	4.05151e-09
TraesCS4A01G672900LC	F-box protein	4A	717820051	3.52485		1.02302	4.22e-06	1.04825	0.00706543	1.1761	0.000104435
TraesCS4B01G618500LC	zinc finger (C2H2 type) family protein	4B	673202372	2.34729		1.02267	0.000558825	1.10412	0.0248036	1.20564	0.00147352	1.21092	0.00881697
TraesCS2D01G022400	Alpha/beta-Hydrolases superfamily protein	2D	10218853	10.92		1.02259	9.72e-06			1.26617	1.32906e-05	1.10525	0.00152844
TraesCS7B01G064100	Chaperone protein dnaJ	7B	69786199	5.87784		1.02169	2.24e-07	1.05464	0.000755264	1.02233	5.50101e-05	1.11711	0.00020697
TraesCS5A01G017900LC	Nitric oxide synthase, endothelial	5A	10036199	6.24763		1.02159	9.8e-10			1.16772	1.27578e-07	1.39626	1.1189e-07
TraesCS6A01G355500	WEB family protein, chloroplastic	6A	586815893	8.3471		1.02137	2.62e-11			1.15067	4.36628e-09	1.14924	8.92328e-07
TraesCS3B01G086700	Leucine-rich repeat receptor-like protein kinase family protein, putative	3B	54994149	17.0073		1.02136	0.0159884	1.73178	0.00736143			1.42245	0.0246149
TraesCS3A01G514100LC	Ulp1 protease family, C-terminal catalytic domain containing protein	3A	623812317	13.9401		1.02126	0.0278426	1.65306	0.0255002			1.5301	0.0308865
TraesCS2D01G015100	Sulfotransferase	2D	7202625	24.7269		1.02047	1.71e-05			1.19323	8.96164e-05	1.21496	0.000718352
TraesCS4A01G473500	Hydroxycinnamoyl-CoA shikimate/quinate hydroxycinnamoyltransferase	4A	733558565	6.15709		1.0203	1.33e-07			1.24619	7.12227e-07	1.2465	3.33039e-05
TraesCS1B01G180100	Ubiquitin carboxyl-terminal hydrolase 12	1B	326911009	112.389		1.02017	1.01e-08			1.1272	1.27592e-06	1.18762	9.43116e-06
TraesCS6D01G121700	glucuronoxylan 4-O-methyltransferase-like protein (DUF579)	6D	86601286	18.7104		1.01973	2.27e-11			1.07384	9.49049e-09	1.13054	2.00847e-07
TraesCS2B01G403900	Anhydro-N-acetylmuramic acid kinase	2B	572163366	2.83861		1.01864	5.11e-05			1.11587	0.00122476
TraesCS6B01G154900	Protein kinase superfamily protein	6B	158144833	13.8893		1.01796	0.0140999			1.06854	0.0433237	1.24376	0.0429239
TraesCS4A01G287900	Peptide transporter	4A	593113133	2.59751		1.01654	0.0174649
TraesCS7A01G530200	2-oxoglutarate (2OG) and Fe(II)-dependent oxygenase superfamily protein	7A	709586963	2.28806		1.01514	0.00955714	1.56488	0.00957008	1.0203	0.0418636
TraesCS6D01G401400	Plant invertase/pectin methylesterase inhibitor	6D	470618107	8.82247		1.01229	0.0338232			1.41069	0.0176938
TraesCS5D01G043500LC	Leucine-rich repeat receptor-like protein kinase family protein	5D	27284775	3.09684		1.01186	0.000136502
TraesCS2B01G168000	ATP synthase mitochondrial F1 complex assembly factor 2	2B	140847483	47.2895		1.01174	1.27e-06					1.58536	1.76744e-08			1.06903	0.000124926
TraesCS5B01G028300	Tropinone reductase-like protein	5B	27459703	119.094		1.01094	8.02e-09			1.15922	5.69746e-07	1.17512	1.16481e-05
TraesCS2B01G186700	50S ribosomal protein L7/L12	2B	161419531	34.1888		1.00965	1.79e-33	1.01994	8.00061e-15	1.01862	1.41788e-19	1.08296	1.16731e-16
TraesCS6D01G506300LC	Acyl transferase/acyl hydrolase/lysophospholipase superfamily protein	6D	466067132	5.34284		1.00462	0.0267615			1.14199	0.0467962
TraesCS6A01G283300	Saccharopine dehydrogenase	6A	514352831	4.05078		1.0043	0.000359149			1.23956	0.000671168
TraesCS3A01G428700	Glycosyltransferase	3A	671764123	80.8083		1.00399	9.27e-05					1.01967	0.011483
TraesCS5B01G500800	Kinase family protein	5B	668186317	49.2713		1.00092	2.38e-12	1.35558	4.11559e-11			1.32768	6.6137e-11
TraesCS6D01G110400	Homeobox protein, putative	6D	76042793	3.69899		-1.00013	0.00705728			-1.33287	0.0010139
TraesCS2B01G294300	DnaJ / Sec63 Brl domains-containing protein	2B	410943004	62.6609		-1.00045	0.000419129			-1.23362	5.12354e-05	-1.1285	0.00174161
TraesCS7A01G113600	GDSL esterase/lipase	7A	69901220	127.662		-1.00102	0.000349349					-1.29371	0.00184375
TraesCS2B01G364900LC	threonyl-tRNA synthetase, putative / threonine-tRNA ligase	2B	298999978	34.6778		-1.00103	1.53e-10	-1.06011	0.000940276
TraesCS1B01G303300	Disease resistance protein (TIR-NBS-LRR class) family	1B	524160875	18.7705		-1.00133	0.0326431
TraesCS1A01G345300	Pre-mRNA-splicing factor SPP2	1A	532733327	10.8665		-1.00156	0.000448012			-1.24877	0.000435629
TraesCS5D01G562900	Nuclear transport factor 2 (NTF2) family protein	5D	562347714	4.87427		-1.00169	0.0457368			-1.30578	0.0480109
TraesCS7D01G576800LC	Leucine-rich repeat receptor-like protein kinase	7D	545295457	4.86084		-1.0017	0.00316475			-1.37351	0.000231372	-1.23362	0.00468465
TraesCS2D01G006500	Cytochrome P450	2D	3033743	429.743		-1.00172	1.26e-06			-1.16548	2.11638e-06	-1.32287	2.21077e-06
TraesCS4D01G227400	Thaumatin	4D	386723520	92.16		-1.00204	2.65e-10			-1.34933	3.25397e-11	-1.11951	2.73254e-06
TraesCS3A01G518200	F-box domain containing protein-like	3A	735715803	44.1507		-1.0023	0.00106692			-1.08803	0.0155461
TraesCS2B01G058800	Sugar transporter, putative	2B	28471662	6.29991		-1.00232	0.0128714
TraesCSU01G021200	Blue copper protein	Un	23360633	34.284		-1.00242	0.00240976			-1.21154	0.000588021	-1.10453	0.00858347
TraesCS4D01G029000	Thioesterase family protein	4D	12713245	4.3812		-1.0026	0.00025971			-1.17222	8.97206e-05	-1.04385	0.0026705
TraesCS2D01G055000	Glycosyltransferase	2D	22144302	1153.86		-1.00262	8.12e-07			-1.23765	3.53112e-07	-1.08595	0.000149293
TraesCS6B01G144100	ATP-dependent RNA helicase	6B	143605249	18.5435		-1.00276	0.00344643	-1.23236	0.0324138	-1.15777	0.0129274
TraesCS5A01G188300	Strictosidine synthase family protein	5A	389763145	25.7882		-1.00281	8.3e-09			-1.10716	1.49579e-06	-1.27359	7.45339e-07
TraesCS3D01G006500	arabinogalactan protein 18	3D	2306528	17.5091		-1.00281	0.000834582	-1.1502	0.0165164	-1.13124	0.00357247
TraesCS3B01G145800	Ankyrin repeat protein-like	3B	134996448	98.6338		-1.00286	0.000441859	-1.30033	0.00413057			-1.06754	0.0167408
TraesCS7B01G107300	Proline--tRNA ligase	7B	123809894	38.925		-1.00301	0.000643271			-1.37738	8.58546e-06	-1.06368	0.00434578
TraesCS2B01G566400	Light-independent protochlorophyllide reductase iron-sulfur ATP-binding protein	2B	757394279	8.01866		-1.00305	0.00469986			-1.21291	0.00179966	-1.15022	0.012121
TraesCS7D01G047000	Chalcone synthase	7D	24326010	31.4197		-1.0031	0.00227433			-1.10305	0.00398144
TraesCS5B01G417200	Calmodulin-binding protein, putative, expressed	5B	591779625	6.22913		-1.00321	0.000765882			-1.34916	3.31439e-05	-1.25897	0.000816393
TraesCS1B01G090800	Ribonucleoside-diphosphate reductase	1B	91884764	13.495		-1.00365	0.00497064					-1.21246	0.0288926
TraesCS4D01G234200	Peroxidase	4D	394378015	3.31288		-1.00375	0.0244174			-1.46511	0.00323915
TraesCS1B01G741500LC	U3 small nucleolar RNA-associated protein 25	1B	664599357	79.4009		-1.00402	0.00031559			-1.05135	0.0170833
TraesCS1B01G137000LC	LRR receptor-like serine/threonine-protein kinase GSO1	1B	80968598	9.07141		-1.00404	9.51e-06			-1.01788	0.000790397	-1.26241	0.000180575
TraesCS2B01G583000	Retrovirus-related Pol polyprotein from transposon TNT 1-94	2B	770572159	11.9749		-1.00436	5.2e-05			-1.06094	0.000824048
TraesCS7B01G473000	F-box protein skip23	7B	728964106	6.42131		-1.0047	0.00135612
TraesCS1D01G080600	Peroxidase	1D	62935651	13.0624		-1.0048	0.00920903			-1.27553	0.00262004	-1.22193	0.0148931
TraesCS1A01G110900LC	AT hook motif-containing protein, putative	1A	61112140	3.41632		-1.00505	0.0298236
TraesCS2D01G657300LC	E3 ubiquitin-protein ligase CBL-B	2D	619312119	6.4578		-1.00505	0.00502494			-1.2476	0.00227976
TraesCS1B01G046900LC	E3 ubiquitin-protein ligase ORTHRUS 2	1B	24090562	29.0703		-1.00542	0.0024072					-1.25001	0.0100958
TraesCS1D01G162700LC	THO complex subunit 2	1D	115024367	9.7619		-1.00557	0.00105137			-1.09597	0.0118779
TraesCS3B01G598200	Glycosyltransferase	3B	819990269	38.6225		-1.00611	0.000375555			-1.16314	0.00137076
TraesCSU01G143100LC	2,3-bisphosphoglycerate-independent phosphoglycerate mutase	Un	78312465	4.57543		-1.00612	0.00556495			-1.02216	0.0367125	-1.11283	0.0481391
TraesCS2D01G107600	Peroxidase	2D	59727019	39.6549		-1.00614	0.000221691			-1.08469	0.000192959
TraesCS5D01G418200LC	DNA topoisomerase 2-beta	5D	424594477	16.633		-1.0064	0.000113511	-1.07895	0.0177154	-1.11247	0.00234635
TraesCS1B01G571500LC	FAR1-related sequence 2	1B	557393539	3.86973		-1.00698	0.0118835			-1.10841	0.0415409
TraesCS3B01G415600	Protein NRT1/ PTR FAMILY 5.5	3B	652287563	3.37443		-1.00727	0.0159034			-1.39075	0.00427496	-1.40759	0.0122212
TraesCS7B01G410200	COP1-interacting protein 4.1	7B	679490302	15.0665		-1.00745	0.00112624	-1.15756	0.0289231	-1.12389	0.00864901
TraesCS2D01G371500	GRAM domain-containing protein / ABA-responsive protein-related	2D	475876803	9.14388		-1.00785	3.62e-05			-1.29861	1.66405e-06	-1.06199	0.000871857
TraesCS2B01G536500	Kinase, putative	2B	732037588	85.3753		-1.00815	7.73e-06			-1.03162	0.00014794
TraesCS6B01G693600LC	Histone-lysine N-methyltransferase family protein	6B	657069329	3.46432		-1.00857	0.0262508	-1.80517	0.0103505	-1.367	0.025031
TraesCS7B01G352400	Leucine-rich repeat receptor-like protein kinase family protein	7B	608900533	16.6183		-1.0087	0.000197395	-1.04647	0.024565	-1.29596	0.00036699
TraesCS2A01G490100	Cytochrome P450 family protein	2A	723649578	17.0077		-1.00925	0.000314346			-1.16942	8.79991e-05	-1.07165	0.00230731
TraesCSU01G172500LC	Fatty acyl-CoA reductase	Un	89327782	3.34071		-1.00939	0.00391824
TraesCS4D01G184900	Nicotianamine synthase	4D	323095781	6.94604		-1.00956	0.0315605			-1.14879	0.0499153	-1.37606	0.0391557	-1.34209	0.0130878	-1.56935	0.0137544
TraesCS1B01G072200	DIS3-like exonuclease 2	1B	56994217	61.6032		-1.00978	8.84e-17					-1.092	3.70177e-09
TraesCS3D01G090500	DNA topoisomerase	3D	45938028	4.55836		-1.00995	0.00302757			-1.23881	0.00624943
TraesCS5B01G499700	Pectin acetylesterase	5B	665993123	7.20986		-1.00997	0.000516517			-1.02658	0.00541268	-1.10551	0.00901224
TraesCS1D01G190200	Glutathione S-transferase	1D	262302521	163.063		-1.00999	1.58e-05			-1.07695	1.74283e-05	-1.19537	3.24472e-05
TraesCS3B01G035800	Disease resistance protein RPM1	3B	17595163	9.45733		-1.01011	0.0248279			-1.25476	0.0314242
TraesCS2B01G515300	ADP-glucose pyrophosphorylase family protein	2B	710099957	2.57137		-1.01033	0.00336206	-1.06299	0.033745	-1.1138	0.0065328
TraesCS1B01G430400	F-box family protein	1B	654809137	63.8664		-1.01046	0.000328888	-1.06032	0.00515853	-1.339	8.21778e-06	-1.06579	0.00311639
TraesCS2B01G151600	NBS-LRR disease resistance protein	2B	118322724	23.7604		-1.01064	0.00115851			-1.28249	0.000119206	-1.0667	0.0077135
TraesCS2A01G027300LC	Nbs-lrr resistance protein, putative	2A	13136943	84.9068		-1.01116	0.0266705
TraesCS2A01G332800	Heavy metal transport/detoxification superfamily protein, putative	2A	565368201	20.4537		-1.01119	0.000427837	-1.07073	0.00741516	-1.37176	1.42774e-05
TraesCS2A01G300100LC	Protein FAR1-RELATED SEQUENCE 6	2A	306689456	2.84742		-1.01127	0.0499356	-2.02922	0.00909047
TraesCS2A01G148200	Peroxidase	2A	94290272	3.40009		-1.01133	0.000699023	-1.00844	0.0378957	-1.2199	0.0016177	-1.03241	0.0236415
TraesCS6D01G246400	Peptide transporter	6D	348860610	202.872		-1.01137	6.75e-05			-1.13938	2.75138e-05
TraesCS1B01G148300LC	Sporulation-specific cell division protein SsgB	1B	92327076	10.8264		-1.01139	4.02e-05			-1.12868	0.000322094	-1.19536	0.000910704
TraesCS1A01G201000	Protoheme IX farnesyltransferase	1A	362059731	10.0022		-1.01141	2.9e-05			-1.17562	0.000159144	-1.073	0.00322382
TraesCS4B01G092500	receptor kinase 1	4B	95316155	59.0385		-1.01152	1.28e-05			-1.00037	0.000552378
TraesCS5D01G648200LC	DNA polymerase epsilon catalytic subunit A	5D	557596847	6.26265		-1.01153	0.000410551
TraesCS7B01G337200	Pentatricopeptide repeat-containing protein	7B	592340042	3.71372		-1.01154	3.59e-05			-1.13241	0.00049391	-1.01536	0.0067282
TraesCS6D01G079000	Cytochrome P450 family protein, expressed	6D	44496108	5.70859		-1.01159	0.0120498			-1.34572	0.00294978
TraesCS2B01G623800	Aminotransferase-like, plant mobile domain family protein	2B	797242782	34.8858		-1.01168	1.62e-07	-1.23005	0.000328823	-1.17058	4.60806e-05	-1.00755	0.00320393
TraesCS5B01G305500	Glycosyltransferase	5B	489522521	81.8284		-1.01186	0.00157842			-1.37537	0.000495748	-1.10577	0.021652
TraesCS7B01G296600	TMV response-related protein	7B	533308830	16.3453		-1.012	0.00686422			-1.21362	0.00293679	-1.02753	0.0381362
TraesCS1B01G099100	Diacylglycerol acyltransferase	1B	106764235	200.939		-1.01201	1.17e-33			-1.05629	4.23616e-20	-1.02481	4.44343e-15
TraesCS5A01G388800	Receptor-like protein kinase	5A	585198175	33.5888		-1.0121	1.26e-05			-1.04418	4.61359e-05
TraesCS1A01G011300	Dirigent protein	1A	6654551	361.639		-1.01212	0.000558509	-1.00358	0.0418137	-1.02674	0.0085974
TraesCS3A01G420900	DUF506 family protein	3A	662412530	4.09294		-1.01235	0.000334188			-1.05931	0.000963902	-1.02613	0.0055412
TraesCS1B01G128100	Serine/threonine-protein phosphatase	1B	156848679	94.8652		-1.01281	7.5e-30	-1.01707	4.60743e-14	-1.12124	1.8693e-21	-1.06388	1.55732e-15
TraesCS5B01G356700	Auxin Efflux Carrier family protein	5B	536322670	35.4966		-1.01282	1.56e-05	-1.09673	0.0019306	-1.32845	3.12211e-06	-1.08958	0.00131633
TraesCS3B01G494400LC	TPX2 (targeting protein for Xklp2) protein family	3B	519434715	9.51558		-1.01285	0.0034289			-1.24773	0.00101865	-1.12603	0.012663
TraesCS6A01G408600	Receptor lectin kinase	6A	613303242	2.64492		-1.0131	0.0152585
TraesCS2B01G599400LC	Mitochondrial carrier protein	2B	557048040	5.41666		-1.01315	1.65e-05
TraesCS2B01G351900LC	Retrovirus-related Pol polyprotein from transposon TNT 1-94	2B	275318106	2.89094		-1.01334	0.00992934
TraesCS2A01G183900LC	Sulfotransferase	2A	131711211	193.979		-1.01339	2.78e-07	-1.05642	0.00015161	-1.28765	1.88848e-08	-1.08201	6.25879e-05
TraesCS2D01G436200	Ubiquinol oxidase	2D	546931640	297.838		-1.01362	6.9e-05			-1.3177	1.90571e-06	-1.14903	0.000450599
TraesCS5D01G527600	Receptor-like kinase	5D	544699438	15.0201		-1.01393	6.89e-06	-1.1669	0.000924026	-1.2093	3.48996e-05
TraesCS1B01G191000LC	ATPase E1-E2 type family protein / haloacid dehalogenase-like hydrolase family protein	1B	133426738	13.8785		-1.01422	1.47e-05			-1.03993	0.000800281	-1.09688	0.0021621
TraesCS2B01G466000LC	RNA-directed DNA polymerase (reverse transcriptase)-related family protein	2B	412664703	17.452		-1.01432	3.75e-13					-1.10523	1.18243e-06
TraesCS1B01G262500	transmembrane protein, putative (DUF594)	1B	461295387	9.62762		-1.01473	4.32e-05			-1.01732	0.000729143
TraesCS2B01G465700LC	LINE-1 reverse transcriptase like	2B	412662447	32.2731		-1.01484	2.47e-16					-1.08418	4.09719e-07
TraesCS5B01G115100LC	Aminopeptidase	5B	92657401	38.9335		-1.01487	0.00105091			-1.10371	0.00612353
TraesCS7B01G490000LC	Beta-carotene isomerase D27, chloroplastic	7B	524607335	32.1722		-1.01495	4.06e-07	-1.16328	0.00215647	-1.039	0.00095726	-1.16849	0.00127681
TraesCS2A01G374200	Transcriptional regulatory protein EDS1	2A	617433307	6.33839		-1.01528	7.35e-07	-1.08784	0.00014871	-1.16991	2.05265e-06
TraesCS1D01G144100	Cysteine--tRNA ligase	1D	199600748	194.587		-1.01528	0.000139237			-1.2018	2.16511e-05	-1.05293	0.00174517
TraesCS5A01G579600LC	Histone-lysine N-methyltransferase	5A	610212697	52.6557		-1.01595	4.79e-10			-1.04992	1.35816e-06	-1.036	3.56615e-05
TraesCS2D01G360800LC	Protein UPSTREAM OF FLC	2D	341957654	3.66548		-1.01599	0.0018307					-1.18315	0.0173785
TraesCS1B01G105700	extracellular ligand-gated ion channel protein (DUF3537)	1B	117385817	18.2863		-1.01625	3.17e-10
TraesCS1B01G122000	Translocase of chloroplast 159, chloroplastic	1B	145452861	736.637		-1.01663	3.95e-39			-1.01632	4.66554e-21	-1.08073	7.68727e-19
TraesCS2D01G044200LC	Heat shock 70 kDa protein, mitochondrial	2D	19052774	4.69979		-1.01664	0.00016353	-1.05822	0.016292	-1.25103	0.00042763	-1.00979	0.0166885
TraesCS1B01G105200	Transducin/WD-like repeat-protein	1B	117169810	146.862		-1.01671	7.35e-37	-1.01083	5.78978e-16
TraesCS3B01G381800	rRNA N-glycosidase	3B	600905363	131.18		-1.01672	0.0487268
TraesCS5B01G013400LC	Translation initiation factor IF-3	5B	11203768	12.9819		-1.01676	0.000727131	-1.08202	0.0432123	-1.23774	0.00324123	-1.37129	0.00452961
TraesCS1D01G384700LC	2-oxoglutarate (2OG) and Fe(II)-dependent oxygenase superfamily protein	1D	371588173	7.5838		-1.01678	0.0135798
TraesCS5A01G342800LC	Glutamate receptor	5A	436101151	6.13323		-1.01679	0.00216526			-1.2904	0.000380252	-1.0753	0.0132721
TraesCS1B01G058700	Beta-hexosaminidase	1B	41091711	157.422		-1.01685	6.12e-13			-1.02761	8.06779e-08	-1.04841	1.76158e-06
TraesCS4A01G422600LC	Capsid maturation protease	4A	577865498	19.5397		-1.0169	0.000648413			-1.21403	0.000178875	-1.13884	0.00285814
TraesCS2A01G286700	Jasmonate ZIM domain protein	2A	486470016	80.1696		-1.0169	6.86e-05			-1.24969	1.75632e-05	-1.11085	0.00127992
TraesCS7D01G133200	transmembrane protein, putative (DUF679)	7D	84407024	9.88224		-1.01694	0.000231166			-1.15104	0.000113619	-1.22375	0.000346163
TraesCS5A01G681100LC	F-box family protein	5A	671989039	3.83846		-1.01712	0.0001577			-1.22678	0.000604153	-1.59063	3.32263e-05
TraesCS2D01G275600	DnaJ / Sec63 Brl domains-containing protein	2D	345248089	72.5169		-1.01725	0.000301087			-1.15995	0.000126296	-1.135	0.00141313
TraesCS7B01G356500	Serine/threonine-protein kinase	7B	616903090	17.2642		-1.01727	0.000636642			-1.2428	0.000100183	-1.08935	0.00410074
TraesCS2D01G094700	Retrovirus-related Pol polyprotein from transposon TNT 1-94	2D	46691167	19.8222		-1.01735	0.000186661					-1.16152	0.0100471
TraesCS3B01G255400	WRKY family transcription factor	3B	411844041	7.42797		-1.01745	0.000846591	-1.02752	0.0185092	-1.35069	7.88107e-05	-1.26852	0.00143194
TraesCS7B01G171800	Gag-pol polyprotein	7B	244398404	11.7665		-1.01752	2.31e-08			-1.07167	5.22786e-06	-1.46714	5.18918e-09
TraesCS5A01G341600	F-box family protein	5A	547595821	9.27263		-1.01771	5.87e-06			-1.11159	0.000232302	-1.16518	0.000736112
TraesCS1B01G127700	Small nuclear ribonucleoprotein	1B	156595103	84.9674		-1.01774	7.33e-41			-1.06289	8.16911e-25	-1.07397	1.49717e-20
TraesCS3D01G406300	Benzoate carboxyl methyltransferase	3D	520314484	3.85003		-1.01801	0.0356395					-1.68438	0.00526881
TraesCS6D01G387400	NBS-LRR disease resistance protein	6D	464402361	22.936		-1.01828	0.0261745
TraesCS7D01G516900	Chaperone protein dnaJ	7D	616134204	51.2266		-1.01833	3.48e-11
TraesCS4D01G369200LC	B-block-binding subunit of TFIIIC protein	4D	439670810	4.09507		-1.01899	4.58e-05	-1.08121	0.00567867	-1.15808	0.000360111	-1.30282	0.000285117
TraesCS6B01G361500LC	Retrovirus-related Pol polyprotein from transposon TNT 1-94	6B	296787716	7.0501		-1.01909	0.0246584					-1.37715	0.0477582
TraesCS5A01G551500LC	Transcriptional factor B3 family protein	5A	594083424	1.94079		-1.01916	0.0194548			-1.24201	0.0165809	-1.39178	0.0168251
TraesCS5A01G467800	Calcium-binding family protein	5A	645493887	8.07255		-1.01917	1.79e-05			-1.00584	0.000100629
TraesCS5D01G499900	Pectin acetylesterase	5D	528844738	5.51576		-1.01923	0.00054448			-1.13339	0.00369417	-1.27875	0.00374206
TraesCS2D01G505500	Homeodomain-like superfamily protein	2D	599796985	14.3178		-1.01934	0.000706184			-1.22706	0.000160261	-1.15267	0.00256126
TraesCS3B01G144400	Glycosyltransferase	3B	132904194	177.34		-1.01939	2.13e-07			-1.17348	3.36302e-07	-1.2272	3.21969e-06
TraesCS3B01G833300LC	Nucleolar RNA binding protein	3B	795429333	22.8025		-1.01946	3.96e-05			-1.28825	6.32055e-05	-1.28312	0.00059994
TraesCS2D01G578000	carboxyl-terminal peptidase (DUF239)	2D	641064924	12.3375		-1.01962	0.00377636					-1.20991	0.0157825			-1.13519	0.0221937
TraesCS1D01G273600	Kinase family protein	1D	367915348	19.0705		-1.01966	0.000167959			-1.13382	0.000107408
TraesCS5B01G059400	Glycosyltransferase	5B	65524923	9.17175		-1.02004	0.00258347			-1.31192	0.000357344	-1.17776	0.00677695
TraesCS1A01G070600LC	Nicotinamide-nucleotide adenylyltransferase	1A	32542733	4.56773		-1.02044	0.0456299
TraesCS2B01G065400	Assembly factor CBP4	2B	32057503	27.6268		-1.02051	8.38e-16
TraesCS1B01G094700	O-fucosyltransferase family protein	1B	96587636	89.3605		-1.02069	7.36e-38	-1.04887	1.34278e-17	-1.03013	4.16892e-21	-1.0812	7.79446e-19
TraesCS3B01G173800	INO80 complex subunit D-like protein	3B	174147697	41.003		-1.02073	2.7e-15					-1.17394	2.84315e-10
TraesCS2A01G546600	Cytochrome P450 family protein, expressed	2A	755335638	155.158		-1.02115	0.0136613			-1.29308	0.0130032	-1.69794	0.00397172			-1.43601	0.0157807
TraesCS5A01G349300	Flavin-containing monooxygenase	5A	552503247	1.85053		-1.0212	0.0454231
TraesCS6D01G026600LC	importin alpha isoform 7	6D	10641565	2.11458		-1.0213	0.0206685			-1.26655	0.0138164	-1.30555	0.0269226
TraesCS1B01G090400	Metal tolerance protein	1B	90992270	319.573		-1.0217	2.5e-22			-1.11552	2.78554e-15	-1.21108	3.06841e-14
TraesCS5A01G650900LC	D-aminoacyl-tRNA deacylase	5A	656872349	2.55074		-1.02177	0.0447471			-1.60811	0.00682681
TraesCS6B01G108400LC	Desmoglein-2	6B	56200507	9.43236		-1.02199	1.91e-05			-1.25119	1.60859e-06	-1.05088	0.000584896
TraesCS1B01G100600	MYB transcription factor	1B	109728172	13.9149		-1.02221	1.17e-09	-1.01313	0.000189236	-1.07637	3.09726e-06	-1.39991	1.72401e-08
TraesCS4B01G054800LC	DNA polymerase epsilon catalytic subunit	4B	37347142	2.73083		-1.02229	0.00266122			-1.11454	0.00389592	-1.28119	0.00291287
TraesCS3D01G013000	Sucrose phosphate synthase	3D	4486022	264.574		-1.02244	6.92e-07			-1.02643	0.000152501
TraesCS5A01G262100	Calcium-binding EF-hand family protein-like	5A	475596525	4.00197		-1.02249	0.00141463			-1.00804	0.00503789
TraesCS3B01G197500LC	Ankyrin repeat family protein	3B	135702332	6.54346		-1.02282	0.00862981	-1.5472	0.0100663
TraesCS1B01G206600LC	Rubber elongation factor protein, putative	1B	145361413	760.774		-1.02318	1.48e-25			-1.04426	5.48097e-15	-1.03997	8.19281e-12
TraesCS2D01G336800	Aldo/keto reductase family protein	2D	430432473	25.6917		-1.0232	1.19e-08			-1.00008	1.41828e-05	-1.20574	3.03765e-06
TraesCS6B01G421900	U-box domain-containing family protein	6B	692489261	67.5282		-1.02322	0.00162035			-1.33247	0.000129028	-1.14671	0.00595506
TraesCS6A01G323200LC	UPF0371 protein SSA_0208	6A	305128026	42.5205		-1.02324	0.0102646
TraesCSU01G102900	2-oxoglutarate (2OG) and Fe(II)-dependent oxygenase superfamily protein	Un	90116969	53.104		-1.02344	0.000655263			-1.18117	0.000296827	-1.30207	0.000571236
TraesCS4A01G475700LC	Microtubule associated protein (MAP65/ASE1) family protein	4A	606662203	8.76953		-1.02371	3.38e-05	-1.3116	0.000386007	-1.15756	0.000264653
TraesCS3D01G163900LC	Transposon protein, putative, Mutator sub-class	3D	106554008	1.99821		-1.02399	0.0439137			-1.47032	0.021591	-1.51786	0.0375438	-1.21567	0.046185
TraesCS4A01G297000	SAUR-like auxin-responsive protein family	4A	596713061	6.78672		-1.02407	0.00484967			-1.30772	0.000921935	-1.21719	0.00888955
TraesCS5D01G551900	Beta-fructofuranosidase, insoluble protein	5D	557536229	10.485		-1.02421	0.000144869					-1.10357	0.00686726
TraesCS4A01G248900	Eukaryotic translation initiation factor 3 subunit G	4A	559945238	113.324		-1.02428	0.000753497	-1.18727	0.00318883	-1.48681	3.53715e-06	-1.31024	0.000549336
TraesCS5D01G005000	UDP-N-acetylglucosamine--N-acetylmuramyl-(pentapeptide) pyrophosphoryl-undecaprenol N-acetylglucosamine transferase	5D	3869801	2.32176		-1.0243	0.0142488			-1.52369	0.00749338	-1.815	0.00345416
TraesCS3D01G500100	Calcium-binding protein	3D	589572385	56.8023		-1.02435	4.13e-05			-1.14144	1.95693e-05
TraesCS1B01G358900LC	ATP synthase subunit delta	1B	332750893	6.50363		-1.02482	3.86e-07			-1.23753	9.32245e-06	-1.17602	0.000188547
TraesCS5B01G366900	Receptor-like protein kinase	5B	545575065	43.5545		-1.0251	0.00129317			-1.13903	0.00235977	-1.12346	0.0111775
TraesCS7B01G598800LC	yeast autophagy-like protein	7B	615740049	14.2298		-1.02514	4.41e-10			-1.04131	2.82285e-06	-1.23563	4.31981e-07
TraesCS7A01G520000	Calcium-dependent lipid-binding (CaLB domain) family	7A	704387679	3.97344		-1.02517	0.00247654	-1.02258	0.0319974	-1.01381	0.00910499	-1.18102	0.00692865
TraesCS3A01G303000	Rhomboid family protein	3A	537485380	41.0984		-1.02526	1.11e-06			-1.02603	0.000209745	-1.25473	6.38363e-05
TraesCS3B01G213700	Protein ZINC INDUCED FACILITATOR-LIKE 1	3B	253481530	4.12272		-1.0253	0.0122474	-1.37354	0.0264854	-1.71245	0.000453992
TraesCS6D01G157600	TMV response-related protein	6D	134279395	102.874		-1.02582	7.8e-05			-1.31739	2.50372e-06	-1.16215	0.000437851
TraesCS1A01G261100	F-box family protein	1A	455040417	3.05115		-1.02584	0.0231221			-1.39656	0.00605597
TraesCS4B01G102000	Aspartic proteinase nepenthesin-1	4B	107753028	15.369		-1.02589	0.000264641			-1.35387	6.38425e-06	-1.28709	0.000221624
TraesCS1B01G047500	Sucrose-phosphate synthase	1B	27321809	3.46357		-1.02619	0.0478329
TraesCS4B01G155800	CONSTANS-like zinc finger protein	4B	281732349	71.9572		-1.02629	0.0024129			-1.16918	0.0100508
TraesCS2B01G040100	2-oxoglutarate (2OG) and Fe(II)-dependent oxygenase superfamily protein, putative	2B	18196544	64.3726		-1.02639	2.73e-06			-1.18753	2.78443e-06	-1.07595	0.000303991
TraesCS7A01G116000	WRKY family transcription factor	7A	74158133	13.0002		-1.02652	0.000737765			-1.17149	0.000412452
TraesCS2B01G518900	Agmatine coumaroyltransferase-2	2B	713791045	104.347		-1.02655	0.000205917			-1.28823	1.03485e-05
TraesCS1B01G059000	11S globulin seed storage protein 2	1B	41641594	172.719		-1.02667	4.72e-09	-1.00018	0.00053463	-1.05626	9.09042e-06	-1.06586	0.000115519
TraesCS1D01G351800	Cytochrome P450	1D	436999305	35.6105		-1.02676	1.93e-05			-1.04922	6.74264e-05	-1.08193	0.000405569
TraesCS7B01G435500	Branched-chain-amino-acid aminotransferase 6	7B	702233521	15.5771		-1.02686	0.0329653
TraesCS1B01G150500	P-loop containing nucleoside triphosphate hydrolases superfamily protein	1B	230939323	656.702		-1.027	1.12e-30			-1.02051	5.47194e-16	-1.02658	7.61318e-13
TraesCS1B01G038100	PGR5-like protein 1A, chloroplastic	1B	17889739	30.2841		-1.02723	0.015243
TraesCS7D01G021300	Disease resistance protein (NBS-LRR class) family	7D	10047398	10.477		-1.0273	1.84e-07			-1.11676	1.58512e-05	-1.09212	0.000226552
TraesCS2B01G023500	Reductase 1	2B	10991297	33.7313		-1.02742	0.000399202	-2.02426	1.02452e-07	-1.30513	0.000147016	-1.56455	6.26208e-05
TraesCS1A01G076200	MYB transcription factor	1A	58946262	12.0786		-1.02752	0.00349434			-1.21616	0.00173144	-1.13302	0.01397
TraesCS1B01G104900	Mitogen-activated protein kinase	1B	115953190	271.912		-1.02753	2.31e-30	-1.01853	1.53299e-12	-1.05397	4.17536e-17	-1.09082	1.51039e-14
TraesCS3D01G353800	Calcium-dependent lipid-binding domain-containing protein	3D	464323661	12.4361		-1.0276	0.0156697			-1.4239	0.00260742	-1.25926	0.0267223
TraesCS1D01G558000LC	Receptor-like protein kinase	1D	481473346	19.7838		-1.02761	2.46e-05			-1.28148	1.24997e-06	-1.10331	0.000386336
TraesCS1D01G025400LC	Rhomboid-like protein	1D	11505713	53.1218		-1.02787	1.16e-11
TraesCS5D01G412400	Maternal effect embryo arrest 14-1	5D	475575130	33.3934		-1.02796	3.57e-11					-1.12531	2.11685e-07
TraesCS4A01G675700LC	Disease resistance protein (NBS-LRR class) family	4A	718926457	18.1923		-1.02817	0.00325352
TraesCS7B01G206500	Phospholipase a1-chloroplastic-like	7B	377813434	48.1283		-1.02821	4.83e-05			-1.1607	2.14891e-05
TraesCS2B01G216300LC	Calcium-dependent protein kinase	2B	130058935	4.64949		-1.02824	0.0319328
TraesCS3B01G106600LC	ATP synthase gamma chain	3B	53567508	3.24054		-1.02824	0.00542287			-1.15089	0.0160219
TraesCS7A01G149400	Gasdermin-C	7A	102539746	2.43789		-1.02836	0.00952075			-1.3455	0.00255732	-1.10067	0.0394676
TraesCS2B01G130500	Universal stress protein	2B	97933151	2.64965		-1.02852	0.0208791					-1.39615	0.0249717
TraesCS7B01G296700	TMV response-related protein	7B	533551764	3.78223		-1.02928	0.0191143			-1.27092	0.0133617	-1.39127	0.0182068
TraesCS3D01G225100	PAS domain-containing protein tyrosine kinase family protein	3D	306073243	87.7475		-1.02929	0.000320815			-1.316	1.70444e-05	-1.2524	0.000490478
TraesCS2A01G123700	Photosystem I P700 chlorophyll a apoprotein A2	2A	73152693	27.2434		-1.0293	0.000308293			-1.01106	0.00503769
TraesCS5A01G543000LC	Protein NRT1/ PTR FAMILY 5.2	5A	589360378	11.91		-1.0294	0.000219983	-1.41198	0.000715039	-1.10892	0.00203914
TraesCS2B01G752800LC	ATP/DNA-binding protein	2B	698085056	3.90573		-1.02998	0.0489355									1.71604	0.0124266
TraesCS1B01G132300	ATP-dependent helicase/deoxyribonuclease subunit B	1B	166579285	80.514		-1.03013	1.96e-28	-1.04291	9.18446e-13	-1.00576	5.33889e-15
TraesCS5A01G089700LC	Zinc finger MYM-type protein 1	5A	59022110	12.7369		-1.03018	4.14e-13
TraesCS3A01G493500	Protein kinase	3A	719931688	17.9721		-1.03093	0.00253715			-1.05292	0.0178093	-1.11144	0.0325059
TraesCS3D01G346900LC	Protein kinase-like	3D	358176791	91.6125		-1.03109	0.000119272	-1.09294	0.00478147	-1.49586	9.43966e-07	-1.25795	0.000506786
TraesCS4B01G532900LC	Phosphoserine aminotransferase	4B	625214775	20.0193		-1.03159	1.88e-07			-1.07227	3.00554e-05
TraesCS1D01G357000LC	COP1-interacting protein 4.1	1D	346185514	5.71034		-1.03184	0.0005583			-1.09213	0.00522941	-1.32405	0.00236399
TraesCS6B01G774700LC	Heavy metal-associated protein	6B	702272105	7.42912		-1.03198	0.00608453	-1.09217	0.0466544
TraesCS3D01G094300	Calcium-binding site, putative	3D	48012865	195.042		-1.03222	0.00039708			-1.31111	3.3171e-05	-1.08187	0.00432745
TraesCS1B01G120300	Bifunctional protein FolD	1B	142296453	147.347		-1.03237	6.18e-23
TraesCS2D01G137500	GDSL esterase/lipase	2D	81003843	7.78092		-1.03253	0.00439008			-1.29641	0.00115642	-1.28061	0.00603373
TraesCS7B01G276000	RING finger protein	7B	505368475	105.286		-1.03272	2.19e-05			-1.33124	5.77478e-07	-1.05441	0.000927844
TraesCS3D01G001400	Glycosyltransferase	3D	707879	59.4102		-1.0328	2.29e-06			-1.06361	0.000138163
TraesCS1B01G099000	ABC transporter B family protein	1B	106678900	870.595		-1.0328	1.94e-45	-1.0261	2.14852e-18	-1.07347	1.28874e-25	-1.07105	3.611e-20
TraesCS5D01G265800LC	Protein kinase, putative	5D	298046430	5.10827		-1.0329	0.000280685
TraesCS3B01G176200	Ethylene-responsive transcription factor, putative	3B	178927737	6.95933		-1.03363	0.000341733			-1.34578	3.62609e-05	-1.29842	0.000547664
TraesCS7A01G473600	Germin-like protein	7A	669293143	6.39671		-1.03375	0.00920561			-1.25856	0.00543329	-1.20747	0.0237964
TraesCS3B01G002300	basic helix-loop-helix (bHLH) DNA-binding superfamily protein	3B	2115064	10.0969		-1.03383	0.000862936	-1.09769	0.020441
TraesCS4B01G470300LC	Transposon Ty3-I Gag-Pol polyprotein	4B	570154573	3.90919		-1.03408	0.00082734	-1.32059	0.01046	-1.41044	0.000892077	-1.68051	0.000323278
TraesCS2B01G038500LC	2-oxoglutarate (2OG) and Fe(II)-dependent oxygenase superfamily protein, putative	2B	17896915	2.34483		-1.0342	0.0416713			-1.34393	0.0296295
TraesCS3D01G323500LC	Retrotransposon protein, putative, unclassified	3D	323335222	1.87112		-1.03444	0.0237056			-1.29404	0.0151488
TraesCS1B01G748500LC	Protein transport protein SEC31	1B	667610783	20.9004		-1.03446	0.00230107			-1.11892	0.0266062
TraesCS2D01G550500	Alpha-glucosidase	2D	626385062	36.302		-1.03479	0.0169052			-1.30782	0.0150641	-1.58181	0.0102189	-1.36532	0.00605226	-1.63931	0.00540364
TraesCS7A01G078800	Fructose-1,6-bisphosphatase class 1	7A	43501569	3.51403		-1.03494	0.00234717			-1.01192	0.0252747
TraesCS2A01G535600	Transmembrane protein, putative	2A	750334123	8.62629		-1.03514	0.000653065			-1.3055	8.02828e-05	-1.09324	0.00548293
TraesCS2B01G005500	Leucine-rich repeat receptor-like protein kinase family protein	2B	3659754	12.5154		-1.03516	0.022219			-1.15688	0.0254474	-1.20057	0.0487406
TraesCS3D01G349100	Alpha/beta-Hydrolases superfamily protein	3D	460444830	81.347		-1.03537	0.000281621			-1.23259	3.88705e-05	-1.1283	0.00145074
TraesCS3B01G000500	Cellulose synthase family protein, expressed	3B	369388	13.7507		-1.03555	0.00243748			-1.17766	0.0104685
TraesCS5A01G522400	Cobyric acid synthase	5A	683374602	7.4452		-1.03579	0.000831559			-1.14372	0.00345985	-1.44521	0.000944911
TraesCS7B01G081000	Protein curvature thylakoid chloroplastic-like	7B	91238879	18.1034		-1.03586	0.025606					-1.48143	0.020889	-1.55734	0.0017736	-1.92206	0.000969901
TraesCS3A01G470400	F-box family protein	3A	702420523	6.14301		-1.0359	0.00765254	-1.41088	0.027815			-1.24812	0.0446979
TraesCS6A01G094100	Chlorophyll a-b binding protein, chloroplastic	6A	61400461	3.50265		-1.03593	0.0111495			-1.27526	0.0155466	-1.53295	0.00891684	-1.10246	0.0283676	-1.36015	0.0155073
TraesCS3D01G020200	Eukaryotic translation initiation factor 3 subunit A	3D	6745803	773.865		-1.03609	5.49e-12	-1.02938	1.77316e-05	-1.10697	4.23341e-08
TraesCS5B01G383400	Structural constituent of ribosome protein	5B	562225626	59.5009		-1.0366	9.44e-06			-1.39016	2.12965e-07	-1.05608	0.00102296
TraesCS2B01G465800LC	LINE-1 reverse transcriptase like	2B	412663602	27.5302		-1.03665	2.24e-16	-1.14885	6.17471e-08	-1.127	1.5958e-09	-1.08267	3.16932e-07
TraesCS6B01G140300LC	F-box domain containing protein	6B	80724613	3.09071		-1.03728	0.0143692			-1.28682	0.0079279
TraesCS4B01G333200	carboxyl-terminal peptidase (DUF239)	4B	623643276	26.6089		-1.0378	0.0262896					-1.39321	0.0385855
TraesCSU01G112100	Serine/threonine-protein phosphatase 7 long form-like protein	Un	96206452	6.65476		-1.0379	4.57e-06	-1.29023	0.000235978
TraesCS5D01G004400	ATP-dependent zinc metalloprotease FtsH	5D	3632894	31.1155		-1.03821	1.51e-11	-1.0506	2.82975e-06	-1.12263	5.07346e-09	-1.20121	2.68868e-08
TraesCS2D01G017400	Serine/threonine-protein kinase	2D	8345959	6.92577		-1.03829	0.0048258			-1.33706	0.000698198
TraesCS5B01G321100	Ornithine carbamoyltransferase	5B	506656245	15.6834		-1.03851	0.0027913			-1.27513	0.000854181	-1.11374	0.0151939
TraesCS1B01G416400LC	Retrovirus-related Pol polyprotein from transposon TNT 1-94	1B	400296933	7.07418		-1.03857	5.05e-07	-1.02904	0.000850433			-1.16635	5.93033e-05
TraesCS1B01G071700	Zinc finger family protein	1B	56879307	103.536		-1.03866	1.17e-33	-1.0804	1.12951e-15	-1.10578	1.25817e-20	-1.09931	2.34054e-16
TraesCS1B01G149400	Ubiquitin carboxyl-terminal hydrolase-like protein	1B	222292654	354.087		-1.03871	8.49e-28			-1.07422	2.84139e-16	-1.0388	3.85483e-12
TraesCS6B01G325000LC	Cytochrome b	6B	255074141	6.64151		-1.03886	0.000300652	-1.38107	0.00359889	-1.0997	0.00684652	-1.07065	0.0242907
TraesCS3D01G024100	DNA glycosylase	3D	7605842	90.7038		-1.03933	2.74e-12	-1.0702	1.02392e-05	-1.07477	2.09162e-07
TraesCS7A01G182000	2,3-bisphosphoglycerate-dependent phosphoglycerate mutase	7A	136347996	3.65538		-1.03935	0.00480958			-1.12591	0.0190439
TraesCS4B01G106200	Expressed protein-RZ53	4B	115555054	244.261		-1.03944	7.48e-06			-1.28679	1.08518e-06	-1.14531	0.000229365
TraesCS1D01G432800	S-type anion channel	1D	482323409	36.9623		-1.03948	0.000238192			-1.19379	7.97641e-05
TraesCS3A01G305200	Ribosomal RNA small subunit methyltransferase H	3A	541225967	2.67186		-1.0396	0.0316469			-1.43925	0.00929177
TraesCS5B01G399700	UDP-glycosyltransferase	5B	577212835	12.4212		-1.03963	0.00013135			-1.0508	0.00036828	-1.13836	0.000802714
TraesCS3B01G409400	U-box domain-containing family protein	3B	644919728	23.956		-1.04019	0.000963383			-1.4461	1.3018e-05	-1.11102	0.00547212
TraesCS1B01G061600	F-box/LRR-repeat protein	1B	46690914	30.6805		-1.04037	5.1e-06			-1.07831	0.000318364	-1.15019	0.000924262
TraesCS1A01G298600	WRKY transcription factor	1A	493500537	122.155		-1.04048	2.83e-05			-1.27174	3.64266e-06	-1.02178	0.00188418
TraesCS1B01G137400	Pentatricopeptide repeat-containing protein	1B	175428008	15.3662		-1.0407	3.55e-14			-1.15442	9.66718e-11	-1.14004	9.43613e-09
TraesCS2A01G486100	transcription factor-like protein	2A	721468835	4.35661		-1.04072	0.00156631	-1.09819	0.015088	-1.22685	0.000760021	-1.04111	0.0161518
TraesCS1B01G001800	Phospholipid-transporting ATPase	1B	1430071	453.345		-1.04109	5.73e-10	-1.02665	9.85767e-05	-1.18024	6.6741e-08
TraesCS1B01G091800	RNA polymerase II-associated protein 3	1B	93910203	82.2839		-1.04197	3.85e-28			-1.10643	1.26486e-17	-1.11903	1.65227e-14
TraesCS2B01G203000	Disease resistance protein RGA2	2B	182861725	16.9477		-1.04217	9.9e-05			-1.16218	5.9557e-05	-1.09973	0.00119127
TraesCS4A01G347600	Protein kinase family protein	4A	625485291	3.74314		-1.04232	0.000787029			-1.13568	0.000798063
TraesCS5B01G354200	Serine/threonine-protein kinase	5B	533492607	2.92306		-1.04237	0.0411241			-1.4228	0.0182494	-1.63379	0.016786
TraesCS3B01G244400	F-box family protein	3B	386521675	42.2761		-1.04288	2.42e-38	-1.05494	2.74818e-17			-1.02492	2.30498e-16
TraesCS2D01G562200	Lipoxygenase homology domain-containing protein 1	2D	634154352	13.4543		-1.04303	0.00179309			-1.2883	0.000385065	-1.30358	0.00205306
TraesCS3B01G832200LC	exoribonuclease 4	3B	794921984	2.1644		-1.04316	0.0236161
TraesCS5B01G538800	Protein kinase family protein	5B	694152790	7.9388		-1.0432	0.000802972			-1.17468	0.000522399
TraesCS1B01G131700	DUF4228 domain protein	1B	165064560	21.621		-1.0435	1.53e-13			-1.0175	1.06123e-07	-1.08253	4.06131e-07
TraesCS6D01G203600	BTB/POZ domain-containing protein	6D	288540473	9.85454		-1.04379	0.00123868	-1.05306	0.0194983	-1.46126	3.05408e-05	-1.15501	0.0059233
TraesCS3D01G094400	Initiator tRNA phosphoribosyl transferase family protein isoform 4	3D	48015785	52.1047		-1.04382	0.000458121			-1.25002	9.7445e-05	-1.06745	0.00544737
TraesCS1B01G127600	Mediator of RNA polymerase II transcription subunit 28	1B	156591823	29.8164		-1.044	1.25e-25	-1.03079	2.50214e-11	-1.02769	7.37763e-14	-1.01349	3.63575e-11
TraesCS5A01G255300	DUF2431 domain protein	5A	470995903	1.47297		-1.04418	0.0469801			-1.55583	0.0137412
TraesCS1B01G088700	Chaperone protein dnaJ	1B	85438639	65.7279		-1.0442	1.78e-27			-1.00111	4.13879e-14
TraesCS2B01G566500LC	Protein FAR1-RELATED SEQUENCE 5	2B	521349556	1.68316		-1.04494	0.0453241			-1.38606	0.0244757	-1.84957	0.0056432			-1.38334	0.0325652
TraesCS5A01G359000	BTB/POZ domain-containing protein	5A	561166000	18.8928		-1.04514	1.31e-15
TraesCS7A01G245600LC	Protein kinase C alpha type	7A	141261869	9.73678		-1.04529	0.000538787	-1.14378	0.0169601	-1.11926	0.00411048	-1.15028	0.0111279
TraesCS3A01G437500	Glutathione S-transferase	3A	681321536	8.01073		-1.04529	0.00907536			-1.16498	0.0119116	-1.46381	0.00507494
TraesCS7D01G529500	Dirigent protein	7D	624776086	10.2451		-1.04575	0.00558588					-1.12975	0.0476742
TraesCS1B01G138600	3'-N-debenzoyl-2'-deoxytaxol N-benzoyltransferase	1B	179629227	110.52		-1.04588	8.5e-20	-1.08982	2.20067e-09	-1.0974	4.0767e-12	-1.01446	2.49111e-08
TraesCS7A01G308000	Blue copper protein	7A	435864487	29.0031		-1.04592	0.00363985			-1.3288	0.000676885	-1.06452	0.0256173
TraesCS2D01G217900LC	Calcium-dependent protein kinase	2D	150396100	24.1206		-1.04604	2.32e-14	-1.11283	2.54361e-05	-1.01797	8.44254e-06
TraesCS2A01G092600LC	Histone acetyltransferase	2A	45295366	10.2274		-1.04674	0.00673667	-1.33425	0.0348449	-1.15625	0.0264644
TraesCS4B01G362300LC	Pseudouridine synthase family protein	4B	432788249	12.8993		-1.04686	1.18e-05			-1.22153	2.1615e-06	-1.13485	0.000144451
TraesCS3A01G232400	Metabotropic glutamate receptor 1	3A	434005412	7.06344		-1.04694	0.00671814			-1.33244	0.00151118	-1.01699	0.0491291
TraesCS2A01G275500	Chaperone modulatory protein CbpM	2A	453516360	14.9787		-1.04702	0.00241624			-1.30486	0.00052941	-1.30589	0.00303431
TraesCS7A01G039900LC	HAT transposon superfamily, putative	7A	15529991	9.1011		-1.04709	0.0354041
TraesCS3D01G426200	Bacteriocin carnobacteriocin B2	3D	538698964	8.20981		-1.0471	1.82e-06			-1.04959	0.000101172	-1.14126	0.000184627
TraesCS3B01G416500	Cysteine proteinase inhibitor	3B	653992032	8.23135		-1.04715	0.0168029			-1.20212	0.0279737	-1.4936	0.0154831	-1.24948	0.0149937	-1.54097	0.00906454
TraesCS6B01G257000	MYB	6B	461393684	32.4189		-1.0473	6.82e-05			-1.36077	1.66479e-06	-1.16489	0.000520336
TraesCS6D01G192200LC	50S ribosomal protein L13	6D	132641557	26.5192		-1.04763	0.00905613
TraesCS5B01G436500	Glycosyltransferase	5B	610280298	175.59		-1.04793	5.07e-07			-1.23543	3.14196e-07	-1.09421	0.000115913
TraesCS3B01G146500	HXXXD-type acyl-transferase-like protein	3B	136448859	125.891		-1.04807	2.01e-11	-1.00716	1.75181e-05	-1.17091	2.33781e-09	-1.12454	6.41355e-07
TraesCS5A01G320900	Mitochondrial import inner membrane translocase subunit Tim29	5A	533987695	16.0241		-1.0481	0.000446736			-1.26864	0.000101438	-1.15386	0.00275871
TraesCS1B01G048400	Phenylalanine ammonia-lyase	1B	28442913	48.9073		-1.04847	0.00634863			-1.21445	0.00919446
TraesCS6A01G019300	RNA binding	6A	9316807	45.1102		-1.04851	1.77e-23			-1.12304	1.18791e-16	-1.18333	4.67075e-15
TraesCS2B01G190900	Receptor-like protein kinase	2B	166429307	2.55571		-1.04862	0.00430662	-1.17072	0.0281538	-1.24096	0.00422916	-1.14933	0.0232425
TraesCS3A01G050100	Receptor-like kinase	3A	26410399	14.6183		-1.04868	0.00213014	-1.05554	0.0291403	-1.28306	0.000678028	-1.10685	0.0145769
TraesCS1B01G124800	Tubulin beta chain	1B	151461221	116.132		-1.0487	4.82e-29	-1.01722	1.23068e-11	-1.1479	9.52376e-19	-1.17171	1.29532e-15
TraesCS2D01G582000	Agmatine coumaroyltransferase-2	2D	643122317	222.014		-1.04876	0.00457846			-1.26743	0.00158047
TraesCS3B01G262700	Tethering factor for nuclear proteasome sts1	3B	421531787	2.07835		-1.04925	0.0463613
TraesCS5A01G542500	Phosphoglycerate mutase family protein	5A	698502229	14.6451		-1.04952	3.95e-14	-1.05046	2.095e-06	-1.06876	4.0711e-08	-1.00857	4.57835e-06
TraesCS5A01G579700LC	Histone-lysine N-methyltransferase	5A	610215036	75.7318		-1.04971	1.13e-10			-1.06452	1.12476e-06	-1.09927	1.17502e-05
TraesCS6A01G303200	Alpha-galactosidase	6A	536433784	24.3631		-1.04986	6.83e-07					-1.11179	0.000359951
TraesCS1B01G070600	F-box family protein	1B	55967356	5.72508		-1.04992	0.000417862			-1.11144	0.00377538	-1.18303	0.00699571
TraesCS1B01G144600	Hexosyltransferase	1B	196872439	22.0812		-1.05021	1.15e-16			-1.05651	1.82679e-09	-1.1059	1.44289e-08
TraesCS2D01G428400	Sodium transporter family protein	2D	540190216	4.64561		-1.05033	6.63e-05			-1.11593	0.000903746	-1.20061	0.00149929
TraesCS7D01G145400LC	ABC transporter C family member 10	7D	72166864	5.63856		-1.05045	3.98e-06	-1.42875	8.86496e-05	-1.33895	3.27067e-05	-1.26118	0.000556972
TraesCS6A01G300600	Phospholipid--sterol O-acyltransferase	6A	533406903	25.3737		-1.05049	8.04e-06			-1.09149	0.002684	-1.04259	0.0155447
TraesCS3D01G492600LC	Nodulin-like / Major Facilitator Superfamily protein	3D	519953410	87.6056		-1.05078	0.000246723			-1.02801	0.0247519
TraesCSU01G048100	Kinase family protein	Un	37955809	3.34297		-1.05122	0.000145516	-1.00963	0.008345			-1.084	0.00250142
TraesCS5D01G398200	Ammonium transporter	5D	464457539	2.88441		-1.05149	0.0381271			-1.61704	0.00505387
TraesCS1B01G036700	Receptor-like protein kinase	1B	17559909	10.0641		-1.0515	0.000986435	-1.30375	0.0143479	-1.50547	0.000393091	-1.32916	0.00814298
TraesCS1D01G439400	ATP-dependent zinc metalloprotease FtsH	1D	485550691	67.1362		-1.05208	1.91e-06			-1.13476	1.55771e-05
TraesCS5A01G544800	Peptidyl-prolyl cis-trans isomerase	5A	700344859	37.8306		-1.05209	1.36e-28	-1.19229	1.62489e-16	-1.17791	8.02134e-20	-1.09591	4.39089e-14
TraesCS7B01G398800	Glutathione s-transferase	7B	665385115	20.6794		-1.05213	1.92e-05	-1.0963	0.000783717	-1.27527	1.83278e-06	-1.16231	0.000194603
TraesCS4D01G055500	Anthocyanin 5-aromatic acyltransferase	4D	30513753	55.9458		-1.05215	1.87e-05	-1.37887	9.09346e-05	-1.25586	2.71205e-05	-1.5097	8.44813e-06
TraesCS4B01G335500LC	Keratin, type II cytoskeletal 3	4B	402867536	8.14502		-1.05222	0.00850879			-1.24548	0.0184809
TraesCS5B01G321500	Inactive purple acid phosphatase-like protein	5B	506759631	237.068		-1.05239	0.00927354
TraesCS5D01G143300	Glycosyltransferase	5D	229151603	595.799		-1.05246	2.21e-06			-1.27818	6.20351e-07	-1.12512	0.000197368
TraesCS5B01G480300	Calmodulin, putative	5B	652822034	9.54837		-1.05313	0.000653065	-1.12142	0.0121272
TraesCS3D01G474300	NBS-LRR-like resistance protein	3D	575545282	8.8715		-1.05313	0.026245	-1.55432	0.0346934
TraesCS1B01G126600	GATA transcription factor, putative	1B	155404644	19.557		-1.05346	4.25e-18	-1.01829	1.07638e-08	-1.07115	1.02182e-11	-1.14854	3.02706e-11
TraesCS6A01G236300LC	tRNA-2-methylthio-N(6)-dimethylallyladenosine synthase	6A	162191933	30.0055		-1.05351	0.00713629			-1.18252	0.0444887
TraesCS2A01G087400	BTB/POZ/MATH-domain protein	2A	41103377	5.59383		-1.05375	0.0329652	-1.45245	0.0394069	-1.51253	0.00716781
TraesCS5D01G327700	alpha/beta-Hydrolases superfamily protein	5D	420595529	14.8409		-1.05427	0.00142118			-1.39169	7.98651e-05	-1.01744	0.0184799
TraesCS1A01G243400	ATP-dependent RNA helicase	1A	431780840	16.8308		-1.05458	0.000751182			-1.38481	4.67322e-05	-1.03104	0.0127859
TraesCS2B01G572100	Blue copper protein	2B	762062450	59.8531		-1.05482	0.000985814			-1.33734	7.59034e-05	-1.1726	0.00359495
TraesCS2A01G543300	BTB/POZ/MATH-domain protein	2A	753403926	9.56959		-1.05489	0.0255302
TraesCS2B01G612100	Receptor kinase-like protein	2B	791019525	4.12032		-1.05509	0.0226724	-1.49139	0.0467154	-1.29579	0.0373471	-1.57951	0.0238284
TraesCS1B01G056500	F-box family protein	1B	39393327	9.96528		-1.05514	1.35e-05	-1.24994	0.00102457	-1.0376	0.00148375
TraesCS1A01G078200	Peroxidase	1A	61008915	19.5882		-1.05535	0.00843019			-1.4473	0.00106393
TraesCS7D01G006100	Leucine-rich repeat receptor-like protein kinase family protein	7D	2882845	8.25119		-1.05537	0.00370082			-1.23945	0.00578762
TraesCS2D01G039900	Glutamyl-tRNA(Gln) amidotransferase subunit A	2D	14617171	89.1844		-1.0555	0.0327696			-1.26896	0.0456901
TraesCS3D01G108500	Receptor-like protein kinase, putative,expressed	3D	61696215	3.43459		-1.0558	0.00146914			-1.13233	0.00231053	-1.07241	0.0130569
TraesCS5B01G270300	HTH-type transcriptional regulator	5B	455760759	16.9481		-1.05596	0.000490586			-1.29215	8.21541e-05	-1.05312	0.00753933
TraesCS6A01G373700	F-box/kelch-repeat protein	6A	596889128	5.17717		-1.05602	0.000185079	-1.07271	0.0133656
TraesCS3D01G017300	E3 ubiquitin-protein ligase	3D	5869809	31.1065		-1.05611	1.67e-09	-1.03449	0.000253162	-1.02006	1.77998e-05
TraesCS2B01G034600	receptor kinase 1	2B	16855024	42.0983		-1.05614	0.000448209			-1.02707	0.00597661	-1.52057	0.000250427			-1.3139	0.000959618
TraesCS6A01G080500	WRKY transcription factor, putative	6A	49148982	18.8775		-1.05615	0.000128553	-1.02904	0.00648776	-1.31227	1.18591e-05
TraesCS1B01G114700	F-box protein	1B	134429872	18.428		-1.05619	1.01e-14	-1.02505	1.16258e-06	-1.06801	6.68802e-09	-1.2225	1.24052e-09
TraesCS2D01G002800LC	NBS-LRR disease resistance protein-like protein	2D	2093283	2.72586		-1.05646	0.0206214
TraesCS6D01G008500	Rhodanese-related sulfurtransferase	6D	3459497	7.11955		-1.05671	1.64e-06					-1.18367	0.000139383
TraesCS4A01G202000	Expressed protein-RZ53	4A	491713130	208.313		-1.05677	0.000210289			-1.35591	8.72935e-06	-1.20499	0.000854205
TraesCS1B01G123400	E3 ubiquitin-protein ligase	1B	149601251	473.256		-1.05678	2.21e-34	-1.02471	8.06432e-14	-1.1273	2.88273e-21	-1.13354	5.49609e-17
TraesCS3B01G710800LC	Glycerol-3-phosphate acyltransferase 1	3B	732864845	100.375		-1.05688	5.99e-06			-1.03848	0.000809591
TraesCS6D01G246500	Peptide transporter	6D	349030667	44.5453		-1.05693	4.34e-06			-1.1728	2.06443e-06	-1.17246	3.95261e-05
TraesCS7B01G334900	Receptor kinase	7B	589958403	1.63751		-1.05709	0.0253864			-1.34276	0.015428
TraesCS1B01G262300	Disease resistance protein	1B	461233344	24.9943		-1.05709	2.25e-06	-1.14287	0.000755003	-1.46182	1.09872e-07	-1.37742	1.44144e-05
TraesCS6D01G246800LC	Indole-3-glycerol phosphate synthase	6D	203020769	3.5954		-1.05711	0.000880109	-1.15015	0.0351198	-1.25515	0.00450586	-1.13905	0.0274636
TraesCS3B01G600300	Protein kinase	3B	820901916	24.4162		-1.05712	1.31e-06			-1.31522	4.4637e-07	-1.21682	5.63769e-05
TraesCS1B01G060300	Membrane-associated kinase regulator-like protein, putative	1B	43638732	15.3928		-1.05719	7.92e-12	-1.08657	7.89156e-06	-1.14228	6.26318e-08	-1.08641	5.56861e-06
TraesCS7D01G384300	Light-independent protochlorophyllide reductase iron-sulfur ATP-binding protein	7D	498284965	14.4171		-1.0573	0.000838863			-1.3487	0.000139892	-1.06612	0.0128587
TraesCS1B01G071500	Kinesin-like protein	1B	56316839	67.5606		-1.0575	1.49e-21			-1.04199	3.9753e-12	-1.22727	1.65835e-13
TraesCS6B01G105400	Basic secretory protease	6B	84926995	89.972		-1.05755	0.000259391			-1.16101	0.00612492	-1.09625	0.030511
TraesCS3A01G606000LC	DEA(D/H)-box RNA helicase family protein	3A	693376806	1.52071		-1.05759	0.0373711			-1.4194	0.0192109
TraesCS7A01G692100LC	Aspartic proteinase nepenthesin-2	7A	679388971	2.31849		-1.05783	0.0106642					-1.50722	0.00558566
TraesCS2D01G497300	Tropinone reductase-like protein	2D	593223914	18.6011		-1.05794	0.000673108			-1.12864	0.00100922	-1.40496	0.000310109
TraesCS1B01G066000	ABC transporter G family member	1B	50203806	58.8982		-1.05827	6.5e-16			-1.15625	1.7218e-11	-1.29696	1.43899e-11
TraesCS6D01G060900	pleiotropic drug resistance 13	6D	28628511	244.122		-1.05844	3.69e-05			-1.21685	2.01922e-05	-1.01115	0.00310751
TraesCS1B01G128800	Zinc transporter protein	1B	158516375	69.1431		-1.05891	8.15e-21	-1.04949	1.99936e-09	-1.06925	2.22367e-12	-1.00219	8.69418e-09
TraesCS5B01G570700	Methyl-CpG-binding domain-containing protein 9	5B	712302939	3.39509		-1.05893	0.012892			-1.34931	0.0100771	-1.26414	0.040197	-1.37997	0.00410072	-1.2948	0.0308037
TraesCS5D01G026400	Zinc finger protein	5D	23871018	44.6706		-1.05894	0.000484774			-1.30184	7.12092e-05
TraesCS6A01G016300	Endosperm transfer cell specific PR9	6A	8010135	5.9424		-1.05896	0.0415086					-1.60526	0.0231542	-1.58961	0.00570188	-2.01546	0.00198633
TraesCS1B01G073200LC	5'-methylthioadenosine/S-adenosylhomocysteine nucleosidase	1B	39388131	28.5219		-1.05922	0.00405123			-1.04836	0.0328914
TraesCS2A01G139000	1-(5-phosphoribosyl)-5-[(5-phosphoribosylamino)methylideneamino] imidazole-4-carboxamide isomerase	2A	84233347	2.73712		-1.05928	0.0212847			-1.20383	0.025431
TraesCS1B01G264600	Pyrophosphate-energized vacuolar membrane proton pump	1B	465378841	7.23196		-1.05936	0.000407253			-1.26425	9.2838e-05	-1.14878	0.00242307
TraesCS4B01G450100LC	3-hydroxybenzoate 6-hydroxylase 1	4B	546673244	3.86913		-1.05975	0.00181271			-1.26018	0.00115233	-1.35734	0.00204835
TraesCS7A01G561900	NBS-LRR disease resistance protein	7A	732919436	31.6947		-1.05996	0.000837494	-1.56517	0.000915458			-1.04092	0.03235
TraesCS7A01G199600	NADH dehydrogenase subunit 5	7A	162509073	63.8588		-1.06008	0.000215406			-1.2611	4.56328e-05	-1.05317	0.00449784
TraesCS3B01G320200	Malic enzyme	3B	519057047	153.745		-1.06067	0.00321249	-1.684	0.00232313
TraesCS3B01G197000	Polynucleotidyl transferase ribonuclease H-like superfamily protein	3B	224163407	91.8263		-1.0609	1.35e-26	-1.13443	3.47871e-13	-1.09821	1.26686e-15
TraesCS2A01G185600LC	LINE-1 reverse transcriptase	2A	133692001	5.28071		-1.06099	0.00186494	-1.20516	0.0365147	-1.20574	0.00987138
TraesCS5B01G505700LC	Pimeloyl-[acyl-carrier protein] methyl ester esterase	5B	520901590	195.654		-1.06106	0.00186169	-1.09074	0.0250301	-1.52085	4.69134e-05	-1.39406	0.00162075
TraesCS7D01G689400LC	Calcium-binding protein	7D	611458567	11.5647		-1.0611	0.00979009			-1.31341	0.00441229	-1.30217	0.0165946
TraesCS2B01G045000	Exocyst complex component, putative	2B	22006675	10.0732		-1.06117	0.000311771					-1.10605	0.0149722
TraesCS2A01G410000	Glycosyltransferase	2A	667942161	12.1769		-1.06123	0.000129867			-1.1555	0.000118218	-1.16027	0.000871579
TraesCS5B01G771500LC	Ethylene-responsive transcription factor	5B	694288341	13.7494		-1.0614	0.00380387			-1.40592	0.000288511	-1.01591	0.034102	-1.16426	0.00109941
TraesCS1A01G036800	F-box family protein	1A	20434464	28.3653		-1.06152	0.000939041			-1.13237	0.00969135
TraesCS5B01G336700	Agmatine coumaroyltransferase-2	5B	520046488	30.5667		-1.06178	4.74e-05			-1.21603	1.17184e-05	-1.13319	0.00049542
TraesCS4B01G164800LC	myosin-like protein XIG	4B	156305591	43.5884		-1.06201	3.25e-10	-1.13241	0.0003517			-1.02505	0.00100314
TraesCS1D01G247400	DNA-directed RNA polymerase subunit beta'	1D	340300435	80.1167		-1.0621	7.58e-05	-1.11717	0.00208742	-1.41016	1.2114e-06	-1.23537	0.000311574
TraesCS5B01G794900LC	Retrotransposon protein, putative, Ty1-copia subclass	5B	706673284	3.33867		-1.06214	0.000807121			-1.12672	0.00155546	-1.27236	0.00141331
TraesCS6B01G235700	intracellular protein transporter	6B	403187728	44.0299		-1.06219	2.69e-15			-1.04696	2.30248e-06	-1.01043	8.34278e-05
TraesCSU01G257200	Receptor-like protein kinase	Un	399337316	2.03241		-1.06221	0.0166186			-1.46836	0.00571957	-1.35034	0.029208
TraesCS5A01G182900	Nudix hydrolase 20	5A	382544201	15.4467		-1.06233	1e-05					-1.16456	0.00119127
TraesCS6B01G148700	Homeobox protein, putative	6B	149551262	12.5808		-1.06244	0.00541394			-1.44157	0.000424445
TraesCS3A01G492500	Calcium-binding protein	3A	719353610	59.9		-1.06254	4.5e-05			-1.26227	8.94147e-06	-1.11803	0.000889662
TraesCS3B01G220700	Eukaryotic translation initiation factor 6	3B	270890845	82.9155		-1.06294	0.000576678			-1.31671	7.78999e-05	-1.03797	0.0102286
TraesCS1B01G002400	disease resistance protein (TIR-NBS-LRR class)	1B	1781669	7.85668		-1.063	8.4e-05			-1.15179	0.000987361	-1.3823	0.000420227
TraesCS6A01G091700	Calmodulin-binding protein-like	6A	60222693	11.218		-1.06322	0.00154806	-1.12751	0.0282692	-1.10475	0.00772204
TraesCS6A01G163700	Inositol-1-monophosphatase family protein	6A	158943592	68.4944		-1.06374	0.00759183
TraesCS7B01G064600LC	OSBP(oxysterol binding protein)-related protein 2B	7B	40155043	14.0307		-1.06379	1.35e-08			-1.14637	3.40574e-05	-1.00138	0.00209995
TraesCS2A01G565800	Disease resistance protein RPM1	2A	765168972	11.7816		-1.064	0.0184583			-1.38776	0.0158662	-1.445	0.0320534
TraesCS6A01G236200LC	Bestrophin-like protein	6A	162189841	130.723		-1.06405	0.0117076
TraesCS1D01G412500	WRKY family transcription factor	1D	473855760	4.45479		-1.06412	0.00344957			-1.50075	0.000218832	-1.44849	0.00198158
TraesCS5D01G359000	Serine/threonine-protein kinase	5D	438587757	17.87		-1.06446	0.000138496			-1.22317	5.45344e-05	-1.23998	0.000423907
TraesCS2D01G320200	Elongation factor 1-alpha	2D	411416486	2.52852		-1.06447	0.0412414
TraesCS1A01G367000	Protein kinase-like	1A	545751851	47.4779		-1.06449	0.000138791	-1.40069	0.000192509	-1.76214	1.01705e-08	-1.50558	3.01961e-05
TraesCS1B01G053900	Ankyrin repeat protein-like	1B	34320119	38.0896		-1.06465	2.39e-16	-1.20912	6.61212e-10	-1.18521	6.13027e-12	-1.1216	1.02278e-08
TraesCS3D01G473100	Cortactin-binding protein 2	3D	574854992	41.0073		-1.06472	1.51e-05			-1.18015	7.07722e-06	-1.02267	0.00102132
TraesCS1B01G139400	Copalyl diphosphate synthase	1B	183257859	9.15953		-1.06492	6.27e-10	-1.19884	4.10765e-06	-1.11452	1.72331e-06	-1.18103	4.41979e-06
TraesCS7A01G666200LC	Retrovirus-related Pol polyprotein from transposon TNT 1-94	7A	667347956	3.29452		-1.06498	0.000374002	-1.19495	0.00836022
TraesCS1B01G124200	DNA-directed RNA polymerase II subunit	1B	150664577	47.6946		-1.06512	1.5e-21	-1.05895	3.14996e-09	-1.08753	3.40722e-12	-1.13339	9.51138e-11
TraesCS3B01G048900	Short-chain dehydrogenase/reductase	3B	24818542	205.541		-1.06517	1.72e-06	-1.08749	0.00114541	-1.24525	4.45284e-06	-1.1794	0.000207589
TraesCS1B01G194600	Glutathione S-transferase	1B	349571819	68.0028		-1.0652	0.000238496			-1.25942	5.33608e-05	-1.2316	0.000759109
TraesCS7B01G252400	DUF4228 domain protein	7B	465216381	6.88598		-1.06565	0.000541819			-1.12483	0.00118199
TraesCS4B01G245700	MADS box transcription factor	4B	507964551	52.437		-1.06579	0.00795023			-1.11968	0.0358903
TraesCS1D01G376500	Ethylene-responsive transcription factor	1D	453134528	10.3601		-1.06591	0.000902916	-1.1309	0.0140973	-1.36521	0.000178729	-1.22102	0.00454012
TraesCS6B01G118700LC	Transposon Ty3-G Gag-Pol polyprotein	6B	64182968	3.87766		-1.06603	0.00832048	-1.54545	0.0193719	-1.53316	0.00474874	-1.34062	0.0377333
TraesCS3D01G453200LC	Leucine-rich repeat protein kinase family protein	3D	484114021	14.197		-1.06622	6.98e-13					-1.0023	3.92962e-05
TraesCS4D01G271000	Blue copper protein	4D	441809889	90.8124		-1.06663	3.73e-05			-1.21877	1.08382e-05	-1.10445	0.000732862
TraesCS6B01G196500	TMV response-related protein	6B	233013820	114.611		-1.06674	3.04e-05			-1.39742	6.67173e-07	-1.29427	8.10378e-05
TraesCS6B01G352400LC	protein FLOWERING locus D-like protein	6B	281546325	227.7		-1.06684	2.31e-06	-1.04586	0.0227412	-1.0362	0.00480142	-1.01314	0.020271
TraesCS3B01G055200LC	mechanosensitive channel of small conductance-like 9	3B	24900877	4.71494		-1.06687	6.42e-05					-1.55388	5.26034e-05
TraesCS1D01G409200	F-box family protein	1D	471113836	129.911		-1.06693	4.35e-05			-1.31472	2.00765e-06	-1.07703	0.00110761
TraesCS1D01G243400	ATP-dependent RNA helicase	1D	333500487	18.7302		-1.06727	0.00116578			-1.34714	0.000147596
TraesCS6D01G211200	MYB	6D	298398252	37.6009		-1.06731	0.00021892			-1.44775	3.28554e-06	-1.25154	0.00067322
TraesCS4B01G359100LC	Glutathione S-transferase	4B	428461473	19.4936		-1.06754	3.85e-09			-1.05967	8.77933e-08	-1.00141	1.07558e-05
TraesCS7A01G118300	Subtilisin-like protease	7A	76392436	6.25046		-1.0676	0.00756426			-1.41462	0.0012597	-1.33328	0.0098021
TraesCS6D01G110600	Homeobox protein, putative	6D	76064274	25.2321		-1.06772	0.000279719			-1.32753	2.70743e-05	-1.279	0.000542527
TraesCS3A01G507900	CsAtPR5	3A	729182486	65.7573		-1.06779	0.00579627			-1.16234	0.034727
TraesCS2B01G794500LC	Rho GTPase-activating protein 29	2B	730293922	4.40851		-1.06828	0.00187093	-1.32791	0.0112408	-1.21034	0.00566274
TraesCS1B01G056400	Ankyrin repeat protein-like	1B	39377534	41.1352		-1.06834	1.14e-08	-1.11059	0.000173272	-1.11519	7.30868e-06
TraesCS7D01G272200	F-box protein	7D	262354253	18.4693		-1.06843	8.86e-05			-1.20448	4.94113e-05	-1.06308	0.00249169
TraesCS7B01G003300	Disease resistance protein (NBS-LRR class) family	7B	1304369	6.73901		-1.06875	0.032076			-1.36018	0.0361263
TraesCS6D01G500300LC	Light-independent protochlorophyllide reductase subunit B	6D	463961340	2.72445		-1.06926	0.0187999	-1.53128	0.0189913	-1.49236	0.00566645	-1.58861	0.00960658
TraesCS7B01G433200	Calcium-binding protein	7B	700735736	7.31339		-1.06938	0.0254836	-1.48181	0.0263318	-1.44499	0.00735652
TraesCS4A01G535600LC	Nucleotide/sugar transporter family protein	4A	638238634	5.73377		-1.06965	0.000136146	-1.17072	0.0126558	-1.34567	0.000369968	-1.48731	0.000487225
TraesCS1B01G135100	Triose phosphate/phosphate translocator, chloroplastic	1B	172001144	35.896		-1.06967	1.89e-19	-1.0958	4.80554e-09	-1.14451	2.78126e-12	-1.13238	7.84768e-10
TraesCS3D01G426100	Ribosomal RNA small subunit methyltransferase A	3D	538687158	4.53143		-1.07028	7.4e-05					-1.09391	0.00417732
TraesCS4B01G244600LC	Serine--tRNA ligase	4B	265288846	3.94928		-1.07042	0.000711829			-1.04296	0.0142499	-1.42844	0.00184548
TraesCS7A01G306300	Phospholipase a1-chloroplastic-like	7A	432138525	25.4152		-1.07049	0.000594759			-1.2619	0.000115193	-1.04127	0.00816286
TraesCS6B01G183100LC	Calcium-transporting ATPase	6B	119107368	6.85427		-1.07056	0.00489958			-1.21521	0.0192067
TraesCS7A01G002700	HXXXD-type acyl-transferase-like protein	7A	1690696	55.3641		-1.07068	1.12e-05			-1.21668	1.59185e-05
TraesCS5D01G224000	Histone H4	5D	331841529	9.57765		-1.0707	3.03e-09	-1.24143	1.01371e-05	-1.19055	1.6059e-06	-1.21731	1.14841e-05
TraesCS1B01G136200	Cellulose synthase	1B	173972082	491.741		-1.07088	1.91e-22	-1.01779	1.65102e-08	-1.08816	2.12949e-12	-1.13628	1.00258e-10
TraesCS1B01G138900LC	Zinc finger CCCH domain-containing protein	1B	83638717	184.437		-1.07091	5.2e-23	-1.04941	2.90989e-10	-1.11296	1.03209e-14
TraesCS7B01G462200	Chalcone synthase	7B	719117921	17.1518		-1.07104	0.00630803
TraesCS6D01G282800	Alpha-galactosidase	6D	389980867	8.27136		-1.07109	3.98e-06					-1.32634	6.38368e-05
TraesCS3B01G036800	Patatin	3B	17988148	13.2606		-1.07134	0.00914453	-1.16331	0.0484455	-1.39906	0.00221725	-1.30055	0.0168616
TraesCS2A01G074000LC	Translation initiation factor IF-2	2A	36126206	16.9219		-1.07159	4.41e-06	-1.1647	0.00193392			-1.2319	0.00055911
TraesCS1B01G138200	Pre-mRNA-splicing factor	1B	178095202	73.1758		-1.0719	1e-33			-1.03774	8.70139e-17	-1.06451	2.82213e-14
TraesCS1B01G049100	Histone H2A	1B	28762791	438.732		-1.07198	1.47e-13			-1.12249	1.15475e-08	-1.08808	1.66025e-06
TraesCS3D01G270600	ATP synthase subunit alpha	3D	375202959	90.7932		-1.07217	5.22e-06			-1.15876	5.40745e-06	-1.05143	0.000460643
TraesCS1B01G152700LC	Transposon Ty3-I Gag-Pol polyprotein	1B	95339916	5.45266		-1.07233	0.000156343			-1.31066	0.000222756	-1.25473	0.00214161
TraesCS3A01G492600	Calcium-binding protein	3A	719360336	97.8604		-1.07255	8.34e-06			-1.21812	7.05586e-06	-1.06286	0.000952294
TraesCS5A01G554300	Lipid transfer protein	5A	706270578	337.201		-1.07258	3.44e-06	-1.00531	0.00639985	-1.07846	0.000261329	-1.34339	6.43803e-05
TraesCS3D01G461200	UDP-glycosyltransferase	3D	565819705	686.652		-1.07261	8.9e-05	-1.05019	0.00581882	-1.35478	6.43405e-06	-1.14521	0.00137279
TraesCS2B01G325800	Serpin-like protein	2B	465646444	6.45485		-1.07262	2.56e-08			-1.04444	1.29586e-05	-1.11117	2.80272e-05
TraesCS7D01G494900	Chaperone protein dnaJ	7D	602197018	10.1056		-1.07296	0.00529701			-1.49811	0.000366367	-1.36789	0.00594152
TraesCS1B01G110400	Serine protease	1B	123951675	81.3802		-1.07302	9.52e-26	-1.05626	4.46044e-11	-1.09196	6.37483e-15	-1.11842	1.24476e-12
TraesCS6D01G342800	Transmembrane protein 184C family	6D	441888710	5.38145		-1.07317	0.000411649			-1.39826	8.31578e-05	-1.20888	0.00370924
TraesCS5A01G136200LC	Calreticulin/calnexin	5A	121942441	3.49469		-1.07322	0.00125484			-1.04617	0.0152047
TraesCS4B01G153400	SAP domain-containing protein	4B	262707611	29.2606		-1.07351	2.96e-05	-1.06315	0.0139763
TraesCS6B01G534100LC	Pol polyprotein	6B	512203650	25.9895		-1.07366	0.00741233	-1.44221	0.0325544
TraesCS6A01G063900	Glutamine--fructose-6-phosphate aminotransferase [isomerizing]	6A	34070737	263.976		-1.07374	2.08e-05	-1.0561	0.0024284	-1.39692	4.53892e-07	-1.33189	3.52277e-05
TraesCS3B01G553900	Calcium-binding protein	3B	788072827	22.8242		-1.07385	0.000299857			-1.22795	0.000151453	-1.17226	0.00209159
TraesCS7D01G494800	Chaperone protein dnaJ	7D	602194310	8.43118		-1.07386	0.00198533			-1.49152	6.8735e-05	-1.29558	0.00341398
TraesCS7D01G483000LC	L-arabinose isomerase	7D	459469414	2.66679		-1.07392	0.0125501			-1.58486	0.00156686	-1.66751	0.00331476
TraesCS3A01G279200	Protein FAR1-RELATED SEQUENCE 5	3A	508522694	8.09841		-1.07393	3.29e-05	-1.26451	0.00272975	-1.1686	0.000950326	-1.1035	0.00756589
TraesCS7D01G092300	WRKY family transcription factor	7D	55249829	2.88225		-1.07408	0.00298771	-1.04067	0.0464954	-1.30648	0.00145983	-1.27466	0.00691519
TraesCS3A01G416500LC	fanconi anemia group I-like protein	3A	515897185	10.4506		-1.07414	6.71e-08	-1.05177	0.0014636	-1.02843	0.000203699	-1.10766	0.00043518
TraesCS7A01G100400	pre-mRNA-splicing factor CWC22-like protein (DUF3245)	7A	61792298	4.27883		-1.07415	0.000614753	-1.20019	0.0138674	-1.12547	0.00555606	-1.2583	0.00597516
TraesCS6B01G046100LC	HAT transposon superfamily	6B	21121803	11.1254		-1.07425	4.96e-07			-1.1905	1.33727e-05	-1.26214	4.33295e-05
TraesCS3B01G737000LC	F-box domain containing protein	3B	749648982	3.68837		-1.07449	0.0111789			-1.27105	0.00881684	-1.40568	0.0111124
TraesCS1D01G432700LC	Unknown protein	1D	411117214	33.6418		-1.07467	0.000842652			-1.30413	0.000187632	-1.08994	0.00949499
TraesCS2D01G017800LC	NB-ARC domain containing protein	2D	9278556	1.5245		-1.07482	0.0397349			-1.58972	0.0112073	-1.46648	0.0452314
TraesCS7B01G491600LC	Retrotransposon protein, putative, unclassified	7B	526237986	19.6939		-1.07531	5.18e-05			-1.31917	2.15582e-06	-1.19928	0.000226552
TraesCS3A01G166800LC	Subtilisin-like protease	3A	115612591	4.44563		-1.07543	0.029414			-1.60031	0.00397676
TraesCS1B01G262400	NBS-LRR disease resistance protein	1B	461241481	8.65521		-1.07544	1.66e-07	-1.16869	7.54025e-05	-1.14297	7.54608e-06	-1.04697	0.00037721
TraesCS1B01G146200	DNA helicase	1B	202006166	287.272		-1.07546	1.34e-34	-1.0221	2.40862e-13	-1.11302	4.22728e-20	-1.14907	5.74678e-17
TraesCS7D01G304800	Blue copper protein	7D	386562663	21.0854		-1.0755	0.00293083			-1.4726	0.000174891	-1.18118	0.0128695
TraesCS7D01G068200	Avr9/Cf-9 rapidly elicited protein 65	7D	38710104	11.2541		-1.0757	0.000560705			-1.44696	3.07097e-05	-1.27072	0.00189173
TraesCS7A01G161100LC	ABC transporter ATP-binding protein/permease VMR1	7A	76442334	3.19902		-1.07588	0.0454618			-1.78948	0.00572436	-1.57987	0.0403946
TraesCS1A01G370700	Ethylene-responsive transcription factor	1A	547907222	7.8492		-1.0762	0.00167998	-1.01451	0.0476622	-1.14421	0.00452158
TraesCS5D01G476200	UDP-glycosyltransferase	5D	515337741	14.6596		-1.07633	8.69e-07			-1.19447	1.98908e-06	-1.15762	6.13257e-05
TraesCS7A01G525700	Glutathione S-transferase	7A	708115086	15.2661		-1.07645	5.55e-05	-1.13199	0.00714701			-1.05226	0.00935006
TraesCS1B01G055200	MYB transcription factor	1B	37798960	52.6896		-1.07655	7.13e-08
TraesCS3B01G526400	Bax inhibitor-1 family protein	3B	768670082	44.0247		-1.07662	1.44e-07			-1.14236	5.79889e-05	-1.20287	0.000251533
TraesCS1A01G317500	High molecular weight glutenin subunit	1A	508929289	7.24395		-1.07707	1.27e-06			-1.01424	0.000190566	-1.02312	0.00100031
TraesCS6A01G176800	U-box domain-containing family protein	6A	195293765	31.9599		-1.07806	0.000364897			-1.3125	6.57796e-05	-1.10279	0.00509246
TraesCS2D01G058800	F-box protein family-like	2D	23336695	3.90668		-1.0781	0.0146673			-1.45812	0.00338862
TraesCS1A01G354000	NBS-LRR-like resistance protein	1A	537081890	11.0883		-1.07812	8.95e-05			-1.1532	0.000134686	-1.19769	0.000587068
TraesCS4D01G000600	Terpene cyclase/mutase family member	4D	536520	3.53548		-1.07816	0.00474239			-1.03518	0.0439496
TraesCS1B01G570900LC	RING/U-box superfamily protein	1B	556070351	4.02517		-1.07839	0.0183594			-1.21366	0.0430139
TraesCS1B01G349500	28 kDa heat-and acid-stable phosphoprotein, putative	1B	579937111	35.1602		-1.07847	0.00408215	-1.35136	0.0209917	-1.52337	0.000962557	-1.42652	0.00931292
TraesCS7B01G498000LC	spindle pole body component 110	7B	533308818	18.6045		-1.07869	0.00309177			-1.26519	0.00140716	-1.10305	0.0206947
TraesCS1D01G282300	Glycerol-3-phosphate acyltransferase	1D	379784211	12.3507		-1.07884	7.39e-05	-1.09234	0.00638892	-1.37109	1.71339e-05	-1.08429	0.00446353
TraesCS7D01G125100	Serine/threonine-protein kinase	7D	78306474	30.463		-1.07889	2.98e-05			-1.1337	4.76829e-05
TraesCS1B01G451700	receptor kinase 1	1B	668965065	102.672		-1.07907	1.5e-08	-1.1189	0.00554103	-1.13981	0.000465261	-1.03579	0.00766393
TraesCS1B01G197400LC	Pectinesterase	1B	135962709	7.89977		-1.07908	0.00413636	-1.44048	0.0148408
TraesCS3B01G307900LC	myb domain protein 39	3B	270891276	30.1205		-1.0791	0.000491185			-1.27504	0.000157774	-1.06816	0.00843759
TraesCS5D01G188500	TIR-NBS-LRR class disease resistance protein	5D	290747751	62.9014		-1.07913	0.000120903			-1.33096	8.32821e-06	-1.05193	0.00338451
TraesCS2B01G917400LC	DNA/RNA helicase protein	2B	794345748	91.9398		-1.0795	0.000235382			-1.11835	0.00450852	-1.1478	0.0132127
TraesCS7D01G202500	Sodium-dependent neutral amino acid transporter B(0)AT1	7D	161060469	2.5653		-1.07965	0.0337409			-1.51799	0.0101219	-1.39377	0.0459418
TraesCSU01G079100	Subtilisin-like protease	Un	71290233	5.91384		-1.07966	0.00950914			-1.29646	0.0120835	-1.69131	0.00321084	-1.12227	0.0238251	-1.51713	0.00566486
TraesCS5A01G154700LC	Calnexin-like protein	5A	155216148	13.244		-1.07971	6.4e-17	-1.17858	1.18398e-09	-1.18467	1.34872e-11	-1.30723	4.01924e-12
TraesCS4B01G045100	Regulator of Vps4 activity in the MVB pathway protein, putative	4B	32423688	48.6623		-1.08013	4.14e-06			-1.35287	4.20812e-07	-1.40781	4.18035e-06
TraesCS1B01G099600	Aspartic proteinase	1B	107132568	423.904		-1.0804	7.31e-25	-1.05715	2.2257e-10	-1.07492	9.06325e-14	-1.02902	4.59758e-10
TraesCS3A01G255600	Protein kinase-like	3A	477427448	77.954		-1.08059	7.73e-05	-1.19852	0.00231337	-1.41928	7.11281e-06	-1.13574	0.00275294
TraesCS6B01G332900	Alpha-galactosidase	6B	584222806	5.23834		-1.08066	0.000186065			-1.02892	0.0095899	-1.49354	0.000456587
TraesCS1B01G098800	3-N-debenzoyl-2-deoxytaxol N-benzoyltransferase	1B	105686921	144.251		-1.08074	2.6e-07	-1.33569	7.0029e-05	-1.03549	0.000351031
TraesCS2B01G586300	Acetyl-coenzyme A synthetase	2B	773004203	2.95934		-1.08079	0.00160227	-1.01656	0.0472796	-1.3223	0.00099671	-1.33041	0.00351324
TraesCS7B01G024300	transmembrane protein, putative (DUF679)	7B	23324659	22.1351		-1.08088	0.0009731			-1.34238	0.000240873	-1.2404	0.00413545
TraesCS1B01G083100	Trehalose-6-phosphate synthase	1B	67014998	5.02242		-1.08092	4.71e-06			-1.12432	0.00024804	-1.0544	0.00271596
TraesCS5D01G109700	Rho GTPase-activating protein	5D	123885732	19.3362		-1.08104	9.48e-17	-1.07305	4.87266e-07	-1.14681	7.17491e-10	-1.21757	3.14151e-09
TraesCS1B01G143400	tRNA N6-adenosine threonylcarbamoyltransferase	1B	194784453	21.9037		-1.08109	3.86e-19	-1.05813	2.46987e-09	-1.16895	6.35866e-14	-1.26866	1.20542e-13
TraesCS1B01G578200LC	Retrovirus-related Pol polyprotein from transposon TNT 1-94	1B	562504251	6.84657		-1.0811	7.17e-05	-1.10298	0.0158912	-1.12007	0.00271291	-1.0685	0.0142529
TraesCS6B01G679100LC	Mini-chromosome maintenance complex-binding protein	6B	647456901	16.763		-1.0812	2.29e-08			-1.10627	1.29501e-05	-1.18101	3.88714e-05
TraesCS1B01G032500	Kinase family protein	1B	15744864	45.9756		-1.08127	7.04e-13			-1.12587	1.84878e-08	-1.15408	3.70964e-07
TraesCS1B01G194800	Glutathione S-transferase	1B	349725882	3.40696		-1.08157	0.0245615	-2.34204	0.000602447					1.33386	0.0125067
TraesCS1B01G042000	Pectin acetylesterase	1B	22021103	33.7927		-1.08198	1.2e-10			-1.12255	6.86944e-07	-1.21889	1.76158e-06
TraesCS5D01G301700LC	DNA replication helicase	5D	334693357	12.2989		-1.08202	0.000189569			-1.46029	1.06734e-05	-1.23395	0.00163773
TraesCS7A01G536400	ARM repeat superfamily protein	7A	713755702	28.131		-1.08202	6.34e-05			-1.01893	0.0097596	-1.17471	0.00960278
TraesCS1B01G100400	Transcription factor	1B	109210866	48.9802		-1.0821	4.12e-23	-1.00379	5.36521e-09	-1.08918	3.07901e-13	-1.05802	3.70998e-10
TraesCS7A01G182200LC	Myosin family protein with Dil domain-containing protein	7A	88952552	33.4217		-1.08213	0.00417408					-1.42683	0.0153827
TraesCS6D01G280000	NF-X-like 1	6D	387882878	12.3896		-1.08249	0.000176559			-1.20627	0.000105055	-1.42867	4.74835e-05
TraesCS6D01G396900	Leucine-rich receptor-like protein kinase family protein	6D	469066670	126.278		-1.0826	3.7e-11			-1.07266	1.07325e-09
TraesCS4B01G078800	LOB domain-containing protein, putative	4B	75778120	3.63434		-1.08277	0.00204494
TraesCS1B01G307800	tRNA (guanine-N(7)-)-methyltransferase	1B	530610168	7.81183		-1.08296	0.00523551	-1.1332	0.0410504	-1.23359	0.00494432	-1.2069	0.0194687
TraesCS7B01G235800LC	NAD(P)-binding Rossmann-fold superfamily protein	7B	193957951	2.0836		-1.08307	0.0158275			-1.4817	0.00543393
TraesCS1B01G013900	Ankyrin repeat family protein	1B	6473814	105.378		-1.08342	5.35e-28			-1.13675	3.51872e-17	-1.20088	2.47669e-15
TraesCS4B01G065700	Eukaryotic translation initiation factor 3 subunit G	4B	58597720	68.7831		-1.0838	6.15e-05	-1.12872	0.00251867	-1.47544	7.17854e-07	-1.20642	0.0006562
TraesCS3A01G052100LC	Retrovirus-related Pol polyprotein from transposon TNT 1-94	3A	26017219	16.6702		-1.08402	1.05e-07			-1.06447	2.04721e-05	-1.06848	0.000200415
TraesCS3A01G449200	Thiamin pyrophosphokinase 1	3A	688683575	34.1502		-1.08418	5.06e-09	-1.05275	0.000112178	-1.46718	4.0066e-11	-1.63198	4.8571e-11
TraesCS3B01G560400	PLATZ transcription factor	3B	794543280	3.47867		-1.08452	0.0157198			-1.38163	0.0130887	-1.62309	0.0092826	-1.21187	0.021573	-1.45333	0.0155223
TraesCS1B01G346500LC	Biotin--protein ligase 1, chloroplastic	1B	321233734	3.27993		-1.08468	0.0171088
TraesCS3A01G537100	Protein PLANT CADMIUM RESISTANCE 8	3A	749183830	4.85848		-1.08473	0.000162018			-1.15212	0.00021099	-1.44175	2.39982e-05
TraesCS6B01G288300	Hydroxycinnamoyl-CoA shikimate/quinate hydroxycinnamoyltransferase	6B	519323240	8.10313		-1.08485	0.000972101			-1.30797	0.000305719	-1.2375	0.00352499
TraesCS4A01G464300	RING finger family protein	4A	728129359	7.77463		-1.08535	1.7e-06			-1.01458	0.000932219	-1.17596	0.000623732
TraesCS1B01G655400LC	Protein kinase-like	1B	619094587	21.4848		-1.08585	0.000133756	-1.18072	0.00204084	-1.44803	2.67418e-06	-1.33542	0.000207492
TraesCS6B01G600800LC	NAD-dependent protein deacetylase	6B	579094823	9.52726		-1.08593	0.000846591	-1.04244	0.0225131	-1.24908	0.0005114	-1.34354	0.00117594
TraesCS6A01G491300LC	Pyruvate dehydrogenase E1 component subunit alpha, somatic form, mitochondrial	6A	536436044	14.278		-1.08638	2.76e-06					-1.18777	0.000425199
TraesCS2B01G415100LC	Telomerase activating protein Est1	2B	363978992	3.34292		-1.08638	0.046419					-1.89085	0.0214746
TraesCS7A01G160700	Zinc-finger protein	7A	116774157	62.3618		-1.08663	0.000141998			-1.28616	3.44552e-05
TraesCS7D01G337200LC	Transmembrane protein, putative	7D	252064180	59.7429		-1.08687	1.98e-05			-1.25791	4.11378e-06	-1.14167	0.0003806
TraesCS4B01G084700	Homeobox leucine zipper protein	4B	83052805	529.903		-1.08696	5.35e-14	-1.10931	4.15165e-05	-1.08031	2.4081e-06	-1.06395	6.45949e-05
TraesCS5A01G545000LC	UDP-glycosyltransferase	5A	590455376	5.57392		-1.08714	0.00151519	-1.05734	0.03048	-1.36523	0.00034539	-1.11812	0.0143735
TraesCS2B01G038000	receptor kinase 1	2B	17593455	15.1039		-1.08715	0.00742483
TraesCSU01G093300	UDP-glycosyltransferase	Un	82568509	21.2091		-1.08766	7.77e-06	-1.12159	0.00365221	-1.05978	0.000853497
TraesCS5D01G278200	TMV response-related protein	5D	380031617	24.8525		-1.08772	0.000327289			-1.27223	0.000114901	-1.0068	0.0117786
TraesCS7D01G021200	Protein kinase family protein	7D	10035555	16.2065		-1.08779	5.47e-10			-1.04835	3.02952e-06	-1.10497	1.31571e-05
TraesCS7A01G151600	Non-specific serine/threonine protein kinase	7A	105401956	24.0914		-1.08803	0.000572151	-1.17921	0.006376	-1.28983	0.000201202	-1.07114	0.0103306
TraesCS1A01G027800	SKP1-like protein 4	1A	13228921	10.9536		-1.08836	1.45e-05			-1.19989	0.000264549
TraesCS7D01G168600	RNA ligase/cyclic nucleotide phosphodiesterase family protein	7D	119105069	4.45692		-1.08857	0.00056794	-1.11957	0.00936304	-1.16237	0.000992463	-1.48014	0.000140208
TraesCS1B01G133300	Glycerophosphodiester phosphodiesterase	1B	168415888	28.7658		-1.08881	3.76e-13	-1.20301	2.20185e-08	-1.22643	6.317e-11	-1.11405	2.2567e-07
TraesCSU01G047500	Flavin-containing monooxygenase	Un	37407182	7.39656		-1.08885	2.91e-07	-1.23064	9.9591e-05	-1.33174	9.4465e-07	-1.10992	0.000425687
TraesCS7A01G550000	Receptor-kinase, putative	7A	724118036	6.55948		-1.08889	0.00704623			-1.22525	0.0269005
TraesCS5A01G300200	Ral GTPase-activating protein subunit beta	5A	509225252	9.2211		-1.0889	0.00158436			-1.48987	6.06698e-05	-1.19131	0.00749438
TraesCS7A01G078400LC	NAD(P)-binding rossmann-fold protein	7A	30405200	4.53497		-1.08903	0.0447035
TraesCS3B01G348700	F-box domain containing protein	3B	558500277	43.2641		-1.08918	0.00399867
TraesCS1B01G144500	Zinc transporter	1B	196461658	48.0187		-1.08923	4.2e-24	-1.07095	2.78507e-10	-1.13678	1.74105e-14	-1.14368	6.13374e-12
TraesCS1B01G770400LC	Retrotransposon protein, putative, unclassified	1B	675287724	7.18052		-1.08936	0.0100988
TraesCS6A01G323400LC	Pol polyprotein	6A	305129342	173.274		-1.08939	0.0226463
TraesCS7D01G065600	Avr9/Cf-9 rapidly elicited protein	7D	36448314	7.34764		-1.08941	0.0224006			-1.51415	0.00459882
TraesCS4A01G379500	receptor like protein 16	4A	657096639	9.30222		-1.08985	0.000421852
TraesCS5A01G668500LC	DNA ligase	5A	666228151	7.94825		-1.08989	4.4e-05					-1.25422	0.000581877
TraesCS2B01G062400	Translation initiation factor IF-2	2B	29752797	2.93269		-1.09153	0.0105437	-1.42208	0.0180944	-1.37851	0.0054728	-1.17235	0.048491
TraesCS1A01G189800	Membrane protein insertase YidC	1A	343419125	2.95582		-1.09168	0.0062017	-1.38363	0.0199313
TraesCS7D01G539500	Aquaporin	7D	629823547	15.6468		-1.09188	0.00321023			-1.544	0.000122662	-1.00788	0.0458978
TraesCS1B01G133200	Arabinogalactan peptide-like protein	1B	168330606	9.69619		-1.09188	8.51e-10			-1.17794	1.33875e-06	-1.27562	1.86101e-06
TraesCS7B01G263300LC	Transmembrane protein, putative	7B	228834057	117.859		-1.09203	4.72e-05			-1.27513	8.74286e-06	-1.09739	0.0012912
TraesCS5A01G003500	ATP-dependent zinc metalloprotease FtsH	5A	2426487	32.8826		-1.09209	0.0478662
TraesCS6B01G167600	Glutathione S-transferase	6B	176248941	12.7717		-1.09227	0.00196077			-1.15041	0.00407601	-1.23428	0.00792706
TraesCS5A01G478800LC	Heavy metal transport/detoxification superfamily protein	5A	547795418	4.24369		-1.0923	0.0021944					-1.08771	0.0408981
TraesCS1B01G330300	extra-large GTP-binding protein 3	1B	556071360	17.3891		-1.09231	0.0343106
TraesCS5B01G258400LC	Early-responsive to dehydration stress protein (ERD4)	5B	273855996	52.2516		-1.09244	1.1e-05	-1.00886	0.00507216	-1.4416	3.29831e-07	-1.21868	0.000259543
TraesCS1B01G456900	FAD-binding Berberine family protein	1B	671258794	22.3755		-1.09244	4.99e-09
TraesCS3B01G282500	Germin-like protein	3B	452724955	39.3669		-1.09255	7.11e-05			-1.06412	0.000417536	-1.10118	0.00175648
TraesCS2D01G101800LC	Leucine-rich repeat transmembrane protein kinase	2D	46693205	3.36352		-1.09266	0.000321334					-1.196	0.00772038
TraesCS1B01G170200	Ribonuclease	1B	302033115	114.429		-1.09274	0.00407728	-1.62844	0.00491909
TraesCS7A01G320200	Pectinesterase	7A	462300681	9.68225		-1.0928	0.0456231
TraesCS5B01G008200LC	30S ribosomal protein S5	5B	7138985	15.5567		-1.09281	0.0253938
TraesCS3B01G495800	Methyl esterase 1, putative	3B	739660406	43.7008		-1.09285	1.99e-07			-1.09817	1.41687e-06	-1.04773	7.47109e-05
TraesCS7D01G395100	Methionine--tRNA ligase	7D	509924564	17.621		-1.09297	6.82e-06	-1.14484	0.000770798	-1.39822	4.95855e-07	-1.27825	7.37485e-05
TraesCS7D01G346500	Zinc knuckle family protein	7D	446208822	6.67528		-1.09299	0.00981241	1.89058	0.00678182	1.2986	0.027259
TraesCS2D01G524600	F-box family protein	2D	613122639	14.5842		-1.09356	0.000464746			-1.33715	9.65768e-05	-1.02855	0.0134806
TraesCS7B01G419400	WRKY transcription factor	7B	688163017	52.2814		-1.09371	0.00166732			-1.3231	0.000620749	-1.27198	0.00541245
TraesCS5A01G285500LC	cryptochrome-interacting basic-helix-loop-helix 5	5A	362731615	2.50156		-1.09383	0.0468428
TraesCS7B01G419300	Polypyrimidine tract-binding protein like 3	7B	688130372	5.77797		-1.09402	1.98e-05			-1.1808	0.000116448	-1.14373	0.00117802
TraesCS1B01G136000LC	Senescence-associated protein, putative	1B	80688995	33.5889		-1.09425	1.83e-05					-1.34045	0.00131578
TraesCS5A01G006700	Serine protease HtrA-like	5A	4007182	34.1282		-1.09429	6.96e-10	-1.12014	0.000151695	-1.03683	3.61653e-05
TraesCS1A01G378500	DUF4228 domain protein	1A	551213061	15.6494		-1.09432	4.2e-05			-1.31319	7.05522e-06	-1.23343	0.000288385
TraesCS2D01G452600	Invertase inhibitor	2D	561934812	2.46475		-1.0946	0.0272353			-1.52534	0.0145271	-1.70775	0.0148514
TraesCS1A01G354100	NBS-LRR-like resistance protein	1A	537085606	3.16538		-1.09482	0.00060866			-1.27579	0.000319061	-1.29372	0.00127837
TraesCS2D01G326000LC	RNA-binding protein 47A	2D	298536334	28.0928		-1.09504	2.54e-17	-1.18892	5.94423e-06	-1.10889	1.18343e-06	-1.13715	1.22886e-05
TraesCS5A01G428000	Aldehyde oxidase, putative	5A	612968420	12.9634		-1.09514	4.41e-06			-1.17333	4.10502e-05	-1.46171	4.36385e-06
TraesCS2A01G642000LC	QUASIMODO2 LIKE 1	2A	720443198	1.64043		-1.09518	0.0338905			-1.51833	0.0130882
TraesCS5B01G700200LC	Zinc finger protein	5B	659638663	5.9917		-1.0955	0.0012082	-1.21967	0.00915684	-1.30786	0.000559953	-1.30924	0.00283559
TraesCS2D01G491100	Agmatine coumaroyltransferase-2	2D	589683346	169.196		-1.09566	8.62e-05			-1.28162	1.99432e-05
TraesCS1D01G159700LC	p0028E10.10 protein	1D	113833541	5.76178		-1.09616	7.52e-06	-1.0965	0.00281914
TraesCS1B01G019300	Chaperone protein dnaJ	1B	9081221	37.3277		-1.0965	2.91e-16	-1.07536	2.23114e-06	-1.09372	2.53804e-08	-1.1418	2.47333e-07
TraesCS7D01G030800	Glutathione S-transferase	7D	16170351	226.811		-1.09669	6.49e-05	-1.158	0.00435938	-1.29238	7.1221e-05	-1.16962	0.00248227
TraesCS4B01G085200	Plant regulator RWP-RK family protein	4B	85695747	68.1089		-1.09685	2.46e-12	-1.09543	0.000402535	-1.07736	2.97839e-05	-1.05107	0.000492122
TraesCS5A01G199000	LisH and RanBPM domains containing protein	5A	403873234	37.3537		-1.09735	1.86e-38	-1.13351	2.46027e-21	-1.09018	1.71385e-23	-1.07921	3.29018e-19
TraesCS6A01G267600	Peptide transporter	6A	493755724	32.755		-1.09743	0.000166174			-1.31386	3.25136e-05	-1.11126	0.00322213
TraesCS6B01G039300LC	Protein ApaG	6B	18647593	21.2211		-1.09745	1.92e-09	-1.28278	1.12999e-05			-1.26242	1.14379e-05
TraesCS4B01G305000LC	methyl-CPG-binding domain 9	4B	365180851	5.2633		-1.09746	0.000260486					-1.04394	0.00724925
TraesCS6D01G050900	Receptor-like protein kinase	6D	24375328	55.9771		-1.09751	0.000122108			-1.24134	5.55354e-05	-1.04025	0.00483205
TraesCS7B01G413400	Chaperone protein dnaJ	7B	681750542	5.25715		-1.09757	0.00329238			-1.6353	0.000105628	-1.44257	0.00356392
TraesCS2D01G157900	Cytochrome P450	2D	101377550	175.846		-1.09777	6.65e-07	-1.09606	0.000864542	-1.47682	2.1311e-08	-1.40443	4.27687e-06
TraesCS5D01G562800	Nuclear transport factor 2 (NTF2) family protein	5D	562345001	3.05484		-1.09792	0.00778274			-1.34768	0.0113003
TraesCS4D01G160600LC	Transposon protein, putative, Mutator sub-class	4D	143562095	5.28661		-1.09849	0.00950061			-1.4178	0.0031896	-1.51842	0.00606912
TraesCS1B01G136100	Metallothiol transferase fosB	1B	173596956	44.7022		-1.09875	7.99e-05	-1.62708	9.73809e-05	-1.08679	0.00311352	-1.23835	0.00348656
TraesCS1B01G741400LC	hAT transposon superfamily	1B	664596384	140.354		-1.09888	2.72e-05	-1.0878	0.0349567	-1.13714	0.0053259	-1.12565	0.0199217
TraesCS1B01G335200	NBS-LRR-like resistance protein	1B	562455258	12.0653		-1.09889	8.52e-05	-1.12046	0.00665701	-1.09379	0.00118449
TraesCS2B01G081700LC	Retrotransposon protein, putative, LINE subclass	2B	39205136	5.07853		-1.09929	4.19e-06
TraesCS1B01G137900	Gamma-aminobutyric acid receptor subunit gamma-2	1B	176996761	27.0974		-1.09932	5.68e-09	-1.12787	0.000452145	-1.12404	3.04126e-05	-1.26923	3.15133e-05
TraesCS6A01G116800	Harpin-induced protein	6A	87311462	21.6571		-1.0994	3.67e-05	-1.09175	0.00452445	-1.20286	0.000103904
TraesCS5B01G029200	ELMO/CED-12 family protein	5B	28225561	5.0897		-1.09943	0.0395442			-1.49716	0.0180017	-1.56266	0.03434
TraesCS4B01G394600	HAT transposon superfamily	4B	668870761	29.6779		-1.09958	0.00330965	-1.28808	0.0459468	-1.29581	0.0116401	-1.28315	0.035218
TraesCS4A01G418600	histone acetyltransferase of the CBP family 12	4A	688500572	9.56858		-1.10066	0.0126102			-1.5469	0.00171613
TraesCS6D01G298700	Ethylene-responsive transcription factor	6D	409516232	2.19456		-1.10123	0.0099562			-1.51124	0.0021992	-1.36711	0.0174669
TraesCS6D01G200300LC	Chemotaxis response regulator protein-glutamate methylesterase	6D	141788413	2.65273		-1.10141	0.00821822			-1.41661	0.00883234	-1.48743	0.0152205
TraesCS2A01G069700	Cysteine protease, putative	2A	30567585	9.56648		-1.10167	0.00268094			-1.26524	0.00182137
TraesCS5B01G236900	Ethylene-responsive transcription factor	5B	417885839	6.95981		-1.10258	0.0022186	-1.41507	0.006524	-1.55429	0.000226893	-1.31821	0.00851479
TraesCS5D01G501900	Plant regulator RWP-RK family protein, putative	5D	529548098	11.9857		-1.10291	4.75e-09	-1.0558	9.77669e-05	-1.25043	4.14387e-08	-1.01384	0.000142167
TraesCS2A01G076600	L-lactate dehydrogenase	2A	34293904	67.5308		-1.10327	0.00115399			-1.27482	0.00144339	-1.3514	0.0038253
TraesCS1B01G146500	basic helix-loop-helix (bHLH) DNA-binding superfamily protein	1B	205418995	38.271		-1.1033	9.03e-19	-1.17633	2.38745e-09	-1.2182	1.61079e-12	-1.13058	8.14614e-09
TraesCS7B01G063600LC	NOP56-like pre RNA processing ribonucleoprotein	7B	39843157	9.99913		-1.10363	1.97e-07	-1.15826	0.00168248	-1.30239	1.81261e-05	-1.13669	0.0013603
TraesCS7D01G158100	Receptor-like kinase	7D	105682693	9.83203		-1.10381	0.000655095			-1.39041	7.50969e-05	-1.22997	0.00300263
TraesCS7B01G490900LC	Tryptophan decarboxylase	7B	525596960	72.9519		-1.10383	0.000308293			-1.36872	2.79778e-05	-1.20013	0.00198762
TraesCS1D01G448700LC	Chromodomain-helicase-DNA-binding protein 1-like	1D	419478934	5.99837		-1.10394	5.86e-06	-1.00687	0.00489139	-1.35874	2.32492e-06	-1.25488	0.000127708
TraesCS5D01G317500LC	respiratory burst oxidase homolog A	5D	350703335	11.2642		-1.10417	3.47e-09	-1.30467	1.77082e-05	-1.02482	0.000151445	-1.0794	0.000471277
TraesCS4B01G385600	Polyphenol oxidase	4B	664517668	8.08059		-1.1044	0.000520101
TraesCS6B01G037100	Mitochondrial transcription termination factor-like	6B	21458698	15.1926		-1.10441	0.0453542
TraesCS5B01G354400	Serine/threonine-protein kinase	5B	533507709	10.924		-1.10462	6.53e-08	-1.06244	0.000519856	-1.17416	4.37455e-06	-1.3708	1.23831e-06
TraesCS3B01G039600	Nuclease S1	3B	19247177	350.913		-1.10487	3.69e-22			-1.02464	4.78238e-12	-1.06053	3.01991e-10
TraesCS7B01G064500LC	Serine/threonine-protein phosphatase 2A 56 kDa regulatory subunit beta isoform	7B	40154577	6.83944		-1.10496	2.7e-07			-1.06149	0.000330979	-1.23756	0.000167865
TraesCS6B01G056900	Polyphenol oxidase	6B	37311953	5.77402		-1.10511	0.0243589
TraesCS1D01G405500LC	H -ATPase 4	1D	390674113	6.29051		-1.10516	0.0339048					-1.57848	0.0328404			-1.48137	0.0466816
TraesCS6A01G180400	Cytochrome P450, putative	6A	204717345	12.3348		-1.10516	0.0455838			-1.59372	0.0199241	-1.71095	0.0322455	-2.41576	2.75186e-05	-2.53299	0.000345878
TraesCS7B01G414600	Thiosulfate sulfurtransferase GlpE	7B	682377454	2.33488		-1.10554	0.0290789
TraesCS5B01G777100LC	Aspartate carbamoyltransferase	5B	697346949	3.15261		-1.10559	0.0123345
TraesCS1B01G014100	Pm3-like disease resistance protein	1B	6485067	14.4154		-1.10598	1.62e-10	-1.07008	7.62619e-05	-1.262	3.39925e-08	-1.41006	1.93114e-08
TraesCS7B01G707400LC	Flap endonuclease 1-A	7B	688132691	4.62028		-1.10602	5.22e-05	-1.18985	0.00353735	-1.44578	1.49695e-05	-1.28072	0.000869097
TraesCS1B01G059300	F-box family protein	1B	41840528	15.6428		-1.10626	4.29e-18	-1.05184	1.40997e-08	-1.10104	2.10834e-11	-1.00798	5.20861e-08
TraesCS2A01G730300LC	cytochrome P450, family 705, subfamily A, polypeptide 15	2A	764233715	3.54676		-1.107	0.00266271			-1.11965	0.017758	-1.5382	0.00273643
TraesCS2A01G176600	Disease resistance protein RGA2	2A	136086770	19.4358		-1.10723	7.89e-06			-1.14425	2.07423e-05
TraesCS1B01G051700	MORC family CW-type zinc finger protein 4	1B	31891342	195.478		-1.1073	2.91e-29	-1.09158	2.77637e-12	-1.17677	3.81659e-18	-1.21989	1.75751e-15
TraesCS4B01G056000	Maf-like protein, expressed	4B	45192756	36.5463		-1.1081	0.000355645			-1.40478	2.27219e-05	-1.09856	0.00605518
TraesCS7A01G416900	Auxin efflux carrier family protein	7A	608682791	183.303		-1.10817	7.81e-05	-1.02588	0.00868605	-1.25485	4.61502e-05	-1.00759	0.00673225
TraesCS1B01G047000	Beta-1,3-galactosyltransferase-like protein	1B	26782155	50.6145		-1.10844	8.92e-23			-1.15802	1.35467e-15	-1.24595	1.2162e-14
TraesCS1B01G032600	Ubiquitin-protein ligase, putative	1B	15869835	35.7964		-1.10859	3.63e-16	-1.07284	1.32521e-07	-1.26685	3.40239e-13	-1.17515	2.82633e-09
TraesCS3D01G608500LC	Calmodulin	3D	589426263	2.68851		-1.10871	0.00366872			-1.36774	0.00208972	-1.34544	0.00851177
TraesCS2B01G065300	Pumilio-like protein	2B	31620045	39.3124		-1.10872	1.76e-16	-1.06715	3.56038e-06	-1.21809	4.68704e-10	-1.2497	1.50012e-08
TraesCS1D01G162900LC	Retrotransposon protein, putative, unclassified	1D	115026145	10.4695		-1.10947	0.000194124			-1.05235	0.0141181
TraesCS6B01G409300LC	Transducin family protein / WD-40 repeat family protein	6B	356629856	18.0376		-1.10964	0.000967984			-1.09518	0.0221722
TraesCS2B01G121600	extra-large G-like protein, putative (DUF3133)	2B	88975754	58.5318		-1.10968	4.13e-05	-1.42471	0.000131606	-1.66706	6.47383e-08	-1.479	4.09869e-05
TraesCSU01G255300	Methylesterase	Un	395273029	4.55981		-1.10981	0.00174311			-1.57023	4.50175e-05	-1.08772	0.0206148
TraesCS6B01G023800	Insulin-like growth factor 1 receptor	6B	14461083	9.12073		-1.11032	0.0466712			-1.46008	0.0395161	-1.85287	0.0206059	-2.0858	0.00071738	-2.47859	0.00061792
TraesCS3D01G460600	Ubiquitin thioesterase	3D	565559750	21.5699		-1.11043	1.01e-11	-1.24956	5.84689e-06	-1.23029	2.63921e-07	-1.14907	2.92625e-05
TraesCS1B01G215800LC	Pyridoxal phosphate (PLP)-dependent transferases superfamily protein	1B	157939256	50.5357		-1.11065	3.43e-19	-1.13027	5.43586e-09	-1.22971	2.36731e-13	-1.21148	1.73087e-10
TraesCS3A01G110000	Harbinger transposase-derived nuclease	3A	77409999	18.9254		-1.11097	0.000663086			-1.11725	0.00195428	-1.06582	0.012691
TraesCS2A01G300300	WAT1-related protein	2A	516024494	2.51138		-1.11136	0.00276697	-1.23213	0.0332069	-1.24276	0.00930718	-1.43916	0.00641207
TraesCS1B01G132800	RING finger protein	1B	167715267	95.3538		-1.11178	3.63e-32			-1.11338	8.48194e-18	-1.14549	4.51952e-15
TraesCS1B01G106900	DNA/RNA helicase protein	1B	118509570	114.967		-1.11195	1.12e-30	-1.02725	2.63732e-11	-1.10653	1.27775e-16	-1.11218	1.77798e-13
TraesCS7D01G202700	Transcription-repair-coupling factor	7D	161186994	41.7432		-1.11201	0.000224737			-1.3333	4.37716e-05	-1.18574	0.00218939
TraesCS3A01G492200	Calcium-binding protein	3A	719336555	41.7517		-1.11241	0.000197668			-1.19902	0.000283632	-1.27196	0.000932895
TraesCS2B01G045600	NBS-LRR-like resistance protein	2B	22724085	16.2291		-1.11251	0.00013584			-1.20223	0.000194824	-1.24351	0.000901106
TraesCS7B01G384500	Carboxypeptidase	7B	650238731	3.06624		-1.11278	0.0132671			-1.34338	0.0218135	-1.98777	0.00150146			-1.39903	0.019847
TraesCS3B01G107800	Anthocyanin 5-aromatic acyltransferase	3B	73112524	3.01064		-1.1128	0.000472327	-1.32265	0.00952867	-1.36796	0.00134645	-1.57725	0.000735322
TraesCS1B01G210600LC	PsbP-like protein 2	1B	150777068	10.6526		-1.11321	7.47e-09	-1.0358	0.000410889	-1.22382	5.47405e-07	-1.16491	2.76153e-05
TraesCS1B01G771200LC	F-box protein	1B	675330289	4.41546		-1.11322	0.0414796
TraesCS7B01G658700LC	RING/FYVE/PHD zinc finger superfamily protein	7B	658412240	18.5955		-1.11336	0.0147072
TraesCSU01G145500	Germin-like protein	Un	156681024	3.81971		-1.11352	0.0239117			-1.61527	0.00322023
TraesCS7B01G082100	LMBR1 domain-containing 2	7B	92556137	5.13816		-1.11378	0.00293583			-1.38867	0.000892572	-1.25429	0.011042
TraesCS3A01G488200	Glutathione S-transferase	3A	716097183	38.1619		-1.11381	6.56e-05			-1.14854	0.000149474	-1.27352	0.000264912
TraesCS6A01G129100LC	DegP protease-like protein	6A	68621734	34.7543		-1.11384	0.00211327			-1.0944	0.0231501	-1.20228	0.0322583
TraesCS7D01G355800	Receptor-kinase, putative	7D	459471095	15.517		-1.11427	9.17e-05			-1.32407	1.07243e-05	-1.34961	9.58158e-05
TraesCS5B01G030800LC	TTF-type zinc finger protein with HAT dimerization domain	5B	21593960	8.5668		-1.11431	5.33e-10	-1.28511	1.44539e-06	-1.16636	1.24542e-06	-1.20549	6.17732e-06
TraesCS1D01G130300	PRA1 family protein	1D	143438379	19.2718		-1.11444	4.19e-08			-1.05038	4.54712e-05
TraesCS1B01G107000	Serine/threonine-protein phosphatase	1B	119040340	207.83		-1.11449	7.82e-33	-1.01193	9.73644e-12	-1.12728	1.57065e-18	-1.1538	2.03082e-15
TraesCS1B01G150400	Ferrochelatase	1B	230026678	235.331		-1.11542	3.83e-26	-1.01695	2.25987e-09	-1.05903	5.76883e-13	-1.04857	3.83584e-10
TraesCS3D01G257400	Glycosyltransferase	3D	359630434	26.6336		-1.11573	3.11e-05			-1.19833	4.26908e-05	-1.46468	9.19259e-06
TraesCSU01G076800	F-box family protein	Un	68521052	7.06941		-1.11576	0.0123629	-1.27723	0.0450175	-1.4679	0.00331261
TraesCS7B01G333500	Receptor protein kinase-like	7B	588865309	3.01727		-1.11597	0.00216071			-1.16455	0.00408143
TraesCS6B01G136100	Serine/threonine-protein kinase	6B	133355625	6.96443		-1.11602	0.000672144			-1.48625	3.27718e-05	-1.2762	0.00244864
TraesCSU01G105900	Kinase family protein	Un	92743842	68.4318		-1.11607	1.19e-08	-1.19374	0.00286491	-1.13213	0.000551452	-1.17209	0.0022353
TraesCS1B01G148900	Tobamovirus multiplication protein 2A	1B	218420684	254.561		-1.11623	5.95e-28	-1.10317	3.8299e-11	-1.12368	8.65689e-15	-1.15447	2.02194e-12
TraesCS1D01G372900	Protein kinase-like	1D	451061694	26.3243		-1.11686	7.29e-05	-1.36367	0.000188889	-1.68869	1.9392e-08	-1.56626	6.54125e-06
TraesCS1B01G073500	evolutionarily conserved C-terminal region 6	1B	57435251	183.258		-1.11697	0.000136256			-1.05465	0.00958853	-1.14002	0.0165873
TraesCS5D01G441800	Acetyltransferase, GNAT family protein, expressed	5D	494188824	199.334		-1.11701	5.75e-08	-1.09436	0.000104108	-1.27506	4.73679e-08	-1.15163	2.42731e-05
TraesCS5B01G523200	Aldo/keto reductase family protein	5B	684447199	12.4628		-1.11714	5.22e-05	-1.1236	0.00226756	-1.2195	4.97755e-05	-1.42025	2.82809e-05
TraesCSU01G237600	Sulfotransferase	Un	352521489	21.6738		-1.11765	0.000342168			-1.22951	0.00116992
TraesCS2A01G458100	UBiQuitin family member	2A	705917627	24.7393		-1.11771	0.00272133			-1.32238	0.0026667	-1.62751	0.00120103
TraesCS3A01G501900	CW7	3A	725596502	1.71094		-1.11805	0.0443143			-1.48503	0.0285031	-1.546	0.0469592
TraesCS7B01G030700LC	Retrotransposon protein, putative, Ty3-gypsy subclass	7B	17512154	121.339		-1.11809	0.0354513
TraesCS1B01G183100	Plant basic secretory family protein	1B	329960232	77.929		-1.11828	3.47e-07	-1.46172	1.37404e-06	-1.45326	2.31938e-08	-1.37635	4.85726e-06
TraesCS3A01G404400	Ethylene-responsive transcription factor	3A	649540666	18.6563		-1.11839	0.000681909	-1.10558	0.0176828	-1.40818	0.000109385	-1.12557	0.0104586
TraesCS2D01G311500LC	Cold regulated protein 27	2D	283963517	129.963		-1.11846	1.13e-10	-1.1959	0.00175332	-1.12648	0.000341372	-1.09916	0.00302945
TraesCS6B01G442000LC	Transposon protein, putative, CACTA, En/Spm sub-class	6B	399216688	14.6202		-1.11893	0.00010251	-1.11469	0.0194507	-1.25476	0.000916133
TraesCS2D01G236200LC	actin binding protein	2D	175756499	13.7412		-1.11894	0.000224922			-1.27972	0.000178595
TraesCS6D01G405900	Callose synthase	6D	472787798	13.2709		-1.11897	0.00240574	-1.37078	0.0188199	-1.07364	0.0285727	-1.27975	0.0221122
TraesCS1B01G112300	Mitochondrial 37S ribosomal protein S27	1B	130359372	21.261		-1.11912	2.76e-24			-1.14991	1.98466e-15	-1.11842	3.03342e-12
TraesCS7D01G201300	Pathogenesis-related protein 1	7D	160487671	109.984		-1.11938	9.52e-17					-1.09094	1.26039e-09
TraesCS2B01G571500	Exocyst complex component, putative	2B	761959818	2.93887		-1.11945	0.0412503			-1.35866	0.0491577	-1.57177	0.0451675
TraesCS2D01G004900	NBS-LRR disease resistance protein-like protein	2D	2676801	9.34242		-1.1197	0.000313965	-1.44118	0.00298929	-1.15394	0.00514935
TraesCS1B01G098600	Non-specific serine/threonine protein kinase	1B	105107669	11.6105		-1.11976	1.24e-10			-1.12919	7.55205e-07
TraesCS2A01G029600	NBS-LRR-like resistance protein	2A	13134945	242.327		-1.11984	0.00865904
TraesCS1B01G116700	Serine/threonine-protein kinase ATM	1B	137123190	111.28		-1.12005	4.06e-31	-1.03659	2.88936e-11	-1.10044	4.24646e-16	-1.1071	4.53311e-13
TraesCS2B01G020900	50S ribosomal protein L34	2B	10086499	1.92126		-1.1205	0.0467943
TraesCS5D01G076300	Glycosyltransferase	5D	75912685	8.86531		-1.12075	0.00022942	-1.11445	0.00801305	-1.37879	3.80169e-05	-1.15005	0.0037648
TraesCS3A01G296600LC	Sodium channel protein type 5 subunit alpha	3A	330794896	4.12355		-1.12076	3.59e-05	-1.02782	0.0062371	-1.29378	2.18384e-05	-1.10942	0.00164498
TraesCS6D01G148500	transmembrane protein, putative (DUF247)	6D	121363779	1.91941		-1.12093	0.0162967			-1.45911	0.00874614	-1.3838	0.0324561
TraesCS1B01G129900	Arginine--tRNA ligase	1B	160320098	417.028		-1.12099	8.62e-39	-1.12018	4.79454e-17	-1.26363	1.34329e-27	-1.30924	1.32901e-23
TraesCS6B01G534200LC	Transposon Ty3-I Gag-Pol polyprotein	6B	512204703	31.5856		-1.12113	0.00609639	-1.53269	0.0246013
TraesCS1B01G141900	Proteasome subunit beta type	1B	189703331	392.665		-1.12125	2.21e-28	-1.11674	3.70931e-12	-1.1049	2.96041e-15	-1.15477	3.20904e-13
TraesCS2D01G493000	V-type proton ATPase subunit a	2D	590409574	10.0893		-1.12128	6.55e-05			-1.2063	5.49161e-05	-1.08524	0.00200781
TraesCS2D01G012400	ATP-dependent DNA helicase PcrA	2D	5882145	11.8713		-1.12151	0.0237297					-1.60667	0.0183147	-1.20017	0.0434416	-1.75273	0.00672899
TraesCS2B01G069200LC	P-loop nucleoside triphosphate hydrolases superfamily protein with CH (Calponin Homology) domain-containing protein	2B	32064677	50.9154		-1.12151	1.97e-14	-1.10028	7.61731e-05	-1.22609	1.3896e-07
TraesCS2A01G186200	Lectin receptor kinase	2A	147548378	11.4157		-1.12159	0.000204948			-1.40819	3.36302e-05	-1.18885	0.00317425
TraesCS2D01G008200LC	Defensin	2D	5201901	4.62196		-1.12179	0.00428875			-1.10199	0.0244878	-1.64775	0.00177408			-1.5282	0.0018487
TraesCS5B01G304900	NBS-LRR disease resistance protein	5B	488821009	143.179		-1.12185	8.61e-07	-1.11469	0.000561514	-1.44247	3.29215e-08	-1.19506	0.000109729
TraesCS2D01G357200LC	Regulator of Vps4 activity in the MVB pathway protein	2D	335676706	5.58312		-1.1223	1.89e-06	-1.02845	0.00811163			-1.31261	0.000197368
TraesCS3D01G225900	Cytochrome P450	3D	307794130	6.20388		-1.12232	8.9e-05			-1.28642	5.04437e-05	-1.19623	0.00115414
TraesCS7D01G360300LC	Bax inhibitor-1 family protein	7D	287703963	8.60944		-1.12247	0.000235025			-1.25001	0.00162998	-1.60965	0.000264451
TraesCS6B01G187300	FtsH extracellular protease family	6B	213467077	6.24615		-1.12285	0.000343213			-1.21778	0.000514691	-1.25752	0.00183862
TraesCS1D01G427600LC	Leucine-rich repeat protein kinase family protein	1D	408149047	4.17373		-1.12305	0.0027422	-1.73712	0.00168412	-1.2364	0.0113266	-1.40501	0.0108232
TraesCS3D01G020000	Protein-lysine N-methyltransferase	3D	6730186	130.05		-1.12323	2.91e-29	-1.14876	1.52442e-14	-1.11658	2.02015e-17
TraesCS3D01G147000LC	Ribosomal RNA small subunit methyltransferase A	3D	90198444	2.02639		-1.12358	0.0185923			-1.62714	0.00361746
TraesCS1D01G289100	Blue copper protein	1D	387216043	28.0016		-1.12373	0.000454291	-1.04784	0.0205304	-1.48287	2.13178e-05	-1.17522	0.00509251
TraesCS3B01G410500	NAC domain-containing protein	3B	647244334	13.6896		-1.12441	9.18e-06			-1.48073	1.4597e-07	-1.34713	3.39202e-05
TraesCS2D01G716800LC	Retrovirus-related Pol polyprotein from transposon TNT 1-94	2D	643083084	1.68857		-1.12448	0.0367972			-1.74662	0.0065235
TraesCS7A01G468000	Pathogenic type III effector avirulence factor Avr AvrRpt-cleavage: cleavage site protein	7A	664096581	2.4018		-1.1245	0.00859171			-1.45688	0.00293374
TraesCS3D01G080600	receptor kinase 1	3D	40526099	4.03723		-1.12526	0.000663216			-1.26689	0.000719994	-1.21229	0.00512208
TraesCS2A01G649000LC	Agmatine coumaroyltransferase-2	2A	723867212	25.871		-1.12531	0.000313771			-1.44218	1.42016e-05	-1.09603	0.00636642
TraesCS1D01G163100LC	Retrotransposon protein, putative, unclassified	1D	115034256	13.1712		-1.12538	0.000147829			-1.0147	0.0200996
TraesCS3B01G505600LC	Mitochondrial amidoxime-reducing component 1	3B	534142916	9.74676		-1.12538	4.91e-05	-1.45364	0.0010154	-1.11104	0.00373471
TraesCS6D01G392100	Xyloglucan endotransglucosylase/hydrolase	6D	466907865	33.1793		-1.12556	8.41e-10			-1.29945	1.07571e-08	-1.15252	1.23051e-05
TraesCS2D01G223100	Protein kinase	2D	190111233	6.5189		-1.12587	1.15e-05			-1.25134	9.16307e-06	-1.12464	0.000581041
TraesCS2D01G029200LC	Arginase	2D	13217039	9.7008		-1.12592	0.0121407
TraesCS5B01G499000	DNA-directed RNA polymerase subunit	5B	665741301	33.1715		-1.12596	0.000218511	-1.12659	0.0149023	-1.42128	8.55776e-05	-1.26923	0.00313286
TraesCS3B01G122900LC	Vacuolar fusion MON1 A	3B	66584943	4.57048		-1.12628	0.00315994			-1.39202	0.00668714	-1.37869	0.020868
TraesCS3B01G100600LC	NBS-LRR disease resistance protein	3B	51789475	3.71942		-1.12652	0.019627			-1.27242	0.0377285
TraesCS6D01G167600LC	O-fucosyltransferase family protein	6D	104075648	3.68767		-1.12656	0.00350707			-1.08977	0.035683	-1.25537	0.0324847
TraesCS2D01G052200	O-methyltransferase	2D	20060182	4.84518		-1.12673	0.0265862
TraesCS1B01G133900	Tryptophan aminotransferase	1B	169642060	78.5911		-1.12678	3.81e-17	-1.0519	9.10143e-07	-1.05433	1.15892e-08	-1.0376	9.42473e-07
TraesCS5B01G203100	Myb factor	5B	369485248	14.0841		-1.12694	1.5e-06	-1.05588	0.000581373	-1.1968	2.40643e-06	-1.26096	1.19109e-05
TraesCS7D01G181000	Histone H4	7D	134466311	2.17894		-1.12695	0.0102619			-1.24646	0.0322239
TraesCS5A01G545100LC	UDP-glycosyltransferase	5A	590456531	6.55539		-1.12698	0.00188923	-1.08787	0.0364483	-1.40337	0.000504103	-1.26042	0.00820067
TraesCS7D01G303000	Phospholipase a1-chloroplastic-like	7D	383270001	29.8151		-1.12702	5.95e-05			-1.39074	3.63821e-06	-1.07646	0.00283746
TraesCS1B01G118000	Cullin-1	1B	137645286	342.649		-1.12715	6.29e-32	-1.12526	3.93317e-13	-1.19529	7.20353e-19	-1.19828	4.91358e-15
TraesCS3B01G056300	Kinase superfamily protein, putative	3B	29618481	6.6132		-1.12734	0.00517511	-1.28442	0.0294134	-1.09591	0.025032
TraesCS1B01G047200	Sentrin-specific protease	1B	26967664	25.549		-1.12741	4.12e-08	-1.27052	5.73373e-05	-1.2431	3.88807e-06	-1.47479	9.65572e-07
TraesCS7A01G271900	F-box protein	7A	285425132	5.50643		-1.12746	0.000757504	-1.39911	0.00211557	-1.5	6.66001e-05	-1.24151	0.0052774
TraesCS6D01G199500	Chitinase family protein	6D	277266154	84.0266		-1.12769	0.000124657	-1.04674	0.0127129	-1.54676	1.83391e-06	-1.33712	0.000493111
TraesCS4A01G599900LC	DNA repair and meiosis protein (Mre11)	4A	677731601	7.80648		-1.12801	0.000924367			-1.35583	0.000337659	-1.33922	0.00232939
TraesCS1B01G118500	Protein kinase superfamily protein	1B	139084079	19.3974		-1.12808	9.85e-05	-1.12885	0.0196239	-1.17809	0.00236903	-1.1956	0.00833664
TraesCS1B01G071900	Glycerol-3-phosphate dehydrogenase [NAD(P)+]	1B	56883390	5.34564		-1.12843	2.31e-07					-1.22846	7.70496e-05
TraesCS7A01G255800	60S ribosomal protein L32	7A	243852484	4.66787		-1.12848	0.000528466	-1.61457	0.000512626	-1.30076	0.0013589
TraesCS3B01G392200	Calcium-dependent lipid-binding domain-containing protein	3B	617886712	32.8519		-1.12889	0.00113149			-1.46394	9.01118e-05	-1.27226	0.00432465
TraesCS5B01G491300	Zinc finger protein	5B	659748209	33.5433		-1.12902	0.000275673	-1.01754	0.020686	-1.38939	4.38994e-05	-1.10639	0.00696627
TraesCS1B01G084500	Receptor-like kinase	1B	68944178	70.4065		-1.12905	1.59e-19	-1.04019	1.52653e-07	-1.12204	4.39275e-11	-1.08507	2.35141e-08
TraesCS5A01G471600	LURP-one-like protein	5A	648529704	3.24386		-1.12963	0.00843309			-1.56353	0.00144509
TraesCS1B01G041900	Mitochondrial import inner membrane translocase subunit Tim9	1B	21804421	7.03027		-1.12972	7.42e-05			-1.12561	0.00177407	-1.31045	0.00125965
TraesCS5A01G427800	Aldehyde oxidase, putative	5A	612723410	26.0334		-1.12978	7.9e-18	-1.24145	4.5736e-09	-1.26942	9.6289e-12	-1.22488	5.37372e-09
TraesCS7D01G689300LC	FERM, RhoGEF and pleckstrin domain-containing protein 1	7D	611441692	12.7755		-1.12995	0.000355291			-1.33826	0.000111191	-1.47653	0.00019586
TraesCS1D01G372500	Protein kinase-like	1D	450739146	41.4013		-1.12999	3.3e-05	-1.36962	0.000187297	-1.6465	5.02149e-08	-1.4028	7.75234e-05
TraesCS1B01G095600	Protein phosphatase 2C-like protein	1B	99592300	101.775		-1.13042	9.94e-19	-1.02469	4.83407e-07	-1.1363	5.56078e-11	-1.14856	5.75213e-09
TraesCS6D01G043900	F-box protein PP2	6D	18533352	2.42581		-1.13069	0.0426238			-1.75812	0.00570809
TraesCS7B01G703300LC	Lysophospholipid transporter LplT	7B	686964986	4.30766		-1.13084	0.0226467			-1.54242	0.00624661	-1.34518	0.0471021
TraesCS7A01G536600	ARM repeat superfamily protein	7A	713855092	61.9335		-1.13087	8.98e-05			-1.07896	0.0115338	-1.28001	0.00903726
TraesCS7B01G441900	Calcium-dependent lipid-binding domain-containing protein	7B	706822157	7.55334		-1.13108	0.00763413	-1.41078	0.035532
TraesCS2B01G123400	B12D protein	2B	91034051	22.1901		-1.13132	8.42e-11			-1.24287	1.20198e-08	-1.23118	6.71165e-07
TraesCS1B01G197500LC	Chaperone DnaJ-domain superfamily protein	1B	135962871	7.09944		-1.13133	0.00253741	-1.50844	0.00964535
TraesCS1B01G054500LC	Photosystem I reaction center subunit III	1B	27677207	9.67109		-1.13149	0.0113038			-1.32716	0.020574
TraesCS6B01G274100LC	Spc97 / Spc98 family of spindle pole body (SBP) component	6B	199013520	11.9396		-1.13158	4.42e-05	-1.43481	0.00126273	-1.25871	0.000791267	-1.18947	0.00695089
TraesCS7A01G038500	Embryogenesis transmembrane protein-like	7A	17335140	2.00251		-1.13172	0.0467166
TraesCS7D01G495200	Chaperone protein dnaJ	7D	602294324	18.2985		-1.13244	6.14e-05			-1.31841	1.53552e-05	-1.08573	0.00281919
TraesCS3D01G010700	Tetratricopeptide repeat protein, tpr, putative	3D	3986953	71.3675		-1.13272	0.000149631	-1.27902	0.00731745	-1.0925	0.0055266	-1.10728	0.0170959
TraesCS4D01G021300	Hexosyltransferase	4D	9206179	22.5992		-1.13274	0.000743131	-1.37421	0.0027476	-1.72286	2.75632e-06	-1.31656	0.00285188
TraesCS1D01G159500	Cotton fiber expressed protein-like protein	1D	225431686	8.13912		-1.1329	1.24e-05	-1.33847	6.87053e-05	-1.25092	1.71339e-05	-1.30782	7.30974e-05
TraesCS6A01G303400LC	TBP-associated factor 4B	6A	270465994	31.6499		-1.13292	0.00303412			-1.19271	0.028374	-1.40558	0.0246105
TraesCS4B01G348400	Hfr-2-like protein	4B	641685836	1.99686		-1.13313	0.0172844
TraesCS5B01G489800	Zinc finger protein	5B	659462673	25.3595		-1.13316	0.000532379			-1.38828	0.000104689	-1.07542	0.0134379
TraesCS6D01G050800	Leucine-rich repeat receptor-like protein kinase family protein	6D	24360240	65.0599		-1.13317	7.37e-10	-1.25592	4.09624e-05	-1.21924	2.73744e-06
TraesCS2B01G036100	Glutamyl-tRNA (Gln) amidotransferase subunit A	2B	17202139	2.5829		-1.13341	0.0126613			-1.30784	0.0164303	-1.29475	0.0409629
TraesCS6D01G167500LC	DNA (Cytosine-5-)-methyltransferase	6D	104074632	4.85061		-1.13416	0.00307516			-1.13581	0.0327293	-1.44484	0.0147244
TraesCS5D01G052000LC	Protease HtpX	5D	33074561	9.26825		-1.13443	9.17e-07					-1.16791	0.000512518
TraesCS4D01G264700	Carboxypeptidase	4D	435062651	8.52832		-1.13493	0.00360821			-1.54644	0.000290099	-1.236	0.0165005
TraesCS2A01G543200	Leucine-rich repeat receptor-like protein kinase	2A	753267868	7.83472		-1.13498	2.32e-05	-1.12234	0.0017779	-1.16595	8.72261e-05	-1.06316	0.00221782
TraesCS1B01G081900	Glycosyltransferases	1B	65348021	318.949		-1.13507	1.57e-14	-1.23695	3.38305e-07	-1.15922	3.42184e-08	-1.17951	9.75622e-07
TraesCS5B01G253800	carboxyl-terminal peptidase (DUF239)	5B	436281816	6.90465		-1.13586	0.0060708			-1.34566	0.00659988	-1.68805	0.00235333	-1.20041	0.00987872	-1.5428	0.003259
TraesCS7B01G530900LC	Iron transport multicopper oxidase fio1	7B	566751571	5.89958		-1.13587	0.000352224			-1.29013	0.000200501	-1.32685	0.000863967
TraesCS1B01G134300	Core-2/I-branching beta-1,6-N-acetylglucosaminyltransferase family protein	1B	170569665	17.6539		-1.13627	2.33e-16	-1.35192	1.79989e-10	-1.22044	2.129e-10	-1.14575	1.09516e-07
TraesCS3B01G609600	Cytochrome P450	3B	828763278	167.427		-1.13646	0.000106986			-1.31002	4.19416e-05	-1.39555	0.000165796
TraesCS1D01G386800LC	Protein kinase superfamily protein	1D	373115870	22.1314		-1.13681	9.93e-07			-1.44188	5.13302e-08
TraesCSU01G481500LC	Calcineurin-like metallo-phosphoesterase superfamily	Un	342888302	19.2493		-1.13681	0.000340469			-1.07902	0.0186747
TraesCS2B01G497200	NBS-LRR disease resistance protein-like protein	2B	693723707	6.92161		-1.13694	0.0187714	-2.00996	0.00342441					1.2206	0.0282573
TraesCS6B01G281500LC	Retrotransposon protein, putative, unclassified	6B	205955553	2.01153		-1.13704	0.0199439			-1.61032	0.00633775	-1.68978	0.0118201
TraesCS2B01G700300LC	Pentatricopeptide repeat-containing protein	2B	656541293	12.9218		-1.13711	0.00273124			-1.14457	0.0383074	-1.44933	0.0201273
TraesCS3A01G178400	Kinase-like	3A	202827155	11.871		-1.13766	0.000343412	-1.18857	0.00686594	-1.48082	2.30644e-05	-1.25482	0.00247262
TraesCS2D01G050400LC	Sec14p-like phosphatidylinositol transfer family protein	2D	22160550	3.87692		-1.13792	6.83e-05			-1.07615	0.00401951	-1.20831	0.00374972
TraesCS2D01G543400	Blue copper protein	2D	621267439	28.1152		-1.13804	2.11e-05			-1.3074	5.15424e-06	-1.13966	0.000771546
TraesCS5B01G552000	40S ribosomal protein	5B	703087959	24.0759		-1.13819	5.86e-05	-1.05833	0.0306692	-1.18743	0.00208506	-1.2526	0.00527674
TraesCS5B01G090200LC	Calmodulin	5B	66036803	3.91582		-1.13823	0.00733056			-1.45448	0.00250491
TraesCS2B01G010500	WRKY transcription factor	2B	5684670	47.506		-1.13859	1.09e-05			-1.35469	1.13221e-06	-1.11623	0.000740653
TraesCS4B01G237500	Allene oxide synthase	4B	495147982	2.42461		-1.13876	0.00597308
TraesCS7D01G068100	Avr9/Cf-9 rapidly elicited protein	7D	38703033	67.8798		-1.13887	0.000107651	-1.02511	0.0128155	-1.4489	5.63789e-06	-1.22203	0.00129404
TraesCS5B01G136100LC	Retrotransposable element Tf2	5B	117262286	17.3631		-1.1389	0.000392233	-1.34888	0.00807341	-1.17231	0.00540093	-1.21566	0.0135209
TraesCS3D01G005500	3-ketoacyl-CoA thiolase	3D	2147109	150.345		-1.13923	3.28e-07	-1.09884	0.00188721	-1.13789	7.80964e-05
TraesCS5B01G464200	Nuclear egress protein 2	5B	639120525	42.7268		-1.13933	0.000306261			-1.40794	3.74364e-05	-1.19533	0.00337205
TraesCSU01G234800	Cysteine-rich receptor kinase	Un	346761034	21.8264		-1.13943	0.0101582			-1.09739	0.0357252	-1.30856	0.0290418
TraesCS1B01G123000	Gamma-tubulin complex component	1B	148434746	76.613		-1.13945	2.05e-25	-1.07666	1.25205e-09	-1.08545	2.30048e-12	-1.16902	1.62701e-11
TraesCS7B01G459600	receptor kinase 1	7B	717331483	47.6941		-1.13954	0.0176337			-1.36363	0.0248165
TraesCS4B01G065000	WUSCHEL related homeobox 14	4B	57806069	13.6295		-1.13983	0.000207434	-1.01419	0.0185657	-1.48332	8.30724e-06	-1.20724	0.00229276
TraesCS5D01G004500LC	protein kinase family protein	5D	3633703	7.404		-1.14027	1.06e-06	-1.19517	0.000355623	-1.2501	1.00636e-05	-1.30465	4.31014e-05
TraesCS3D01G321100LC	UDP-N-acetylmuramoylalanine--D-glutamate ligase	3D	321869285	6.64268		-1.14054	2.44e-06			-1.21823	0.000316222
TraesCS1A01G482300LC	myosin XI D	1A	518472704	7.15097		-1.1411	0.000678428			-1.41637	0.000172782	-1.34521	0.00219852
TraesCS5A01G351300	Receptor protein kinase, putative	5A	554081720	10.5811		-1.14134	0.000860121	-1.27644	0.00719493	-1.32285	0.000584544	-1.28253	0.0044482
TraesCSU01G155700LC	ABC transporter, putative	Un	84401449	52.0039		-1.14135	0.00395267
TraesCS6B01G031500	Acid beta-fructofuranosidase	6B	18645459	150.207		-1.14136	1.77e-12	-1.27484	1.57289e-06	-1.0031	1.65427e-05	-1.17572	9.02317e-06
TraesCS1B01G137300	Boron transporter	1B	175415294	566.128		-1.14137	2.44e-11	-1.12685	5.20201e-05	-1.05028	8.74286e-06
TraesCS1B01G093400	Transmembrane protein, putative	1B	94955672	55.6306		-1.14145	9.35e-19	-1.30614	1.09767e-10	-1.10718	8.12009e-10	-1.18365	5.13249e-09
TraesCS6A01G340100	ethylene-responsive transcription factor	6A	573413613	6.96729		-1.14168	0.000684049	-1.46971	0.0011146	-1.40798	0.000198009	-1.18301	0.00855515
TraesCS5A01G082900	Receptor-like protein kinase	5A	108577776	11.9432		-1.14174	5.34e-05			-1.26202	2.92e-05	-1.14849	0.00118212
TraesCS5B01G213900	Serine protease HtrA-like	5B	386651591	14.629		-1.14184	3.25e-08			-1.14148	3.81277e-05	-1.10176	0.000600823
TraesCS7A01G400900	Serine/threonine-protein kinase	7A	580654768	21.1973		-1.14189	0.000637487			-1.19618	0.00143007
TraesCS1B01G000900	RING-finger ubiquitin ligase	1B	1208686	83.2038		-1.14204	1.55e-18	-1.082	2.26764e-07	-1.11981	5.08857e-10	-1.14454	2.1743e-08
TraesCS1B01G102700	Aminotransferase	1B	112748628	1182.74		-1.14206	1.74e-36	-1.07598	7.07838e-14	-1.25267	5.63893e-24	-1.30363	1.59786e-20
TraesCS4B01G366900	Potassium channel KAT1	4B	654125090	5.94438		-1.14232	0.000681995			-1.36758	0.000267945	-1.20637	0.00641955
TraesCS7D01G086200LC	Major facilitator superfamily protein	7D	38550980	7.80698		-1.14254	0.00181014			-1.41018	0.000421947	-1.18333	0.0135408
TraesCS1B01G051100	Nuclear pore complex protein NUP43	1B	30879166	20.9906		-1.14267	1.01e-12	-1.08954	1.49023e-05	-1.27624	2.14205e-09	-1.08663	1.09041e-05
TraesCS5B01G100700	Glutaredoxin family protein	5B	133892957	5.48062		-1.14283	1.08e-05
TraesCS7B01G662800LC	LINE-1 reverse transcriptase like	7B	662526768	9.44284		-1.1429	4.58e-09	-1.09435	0.00123861	-1.18681	2.58137e-05	-1.00863	0.00227618
TraesCS7A01G508700	WRKY transcription factor	7A	696552428	38.3389		-1.14301	0.000354595			-1.18825	0.00196575	-1.29601	0.00367582
TraesCS6B01G136700LC	Peroxisomal ascorbate peroxidase	6B	78504646	62.4962		-1.14314	0.00366274			-1.12915	0.0462158
TraesCS5D01G495100	Leucine-rich repeat receptor-like protein kinase family protein	5D	526693348	3.62034		-1.14314	0.00371132	-1.46533	0.00706957	-1.26662	0.00580583	-1.31889	0.0124786
TraesCS5A01G338600	Agmatine coumaroyltransferase-2	5A	546344835	22.2655		-1.1434	3.29e-06	-1.23176	9.85602e-05	-1.55159	2.98233e-09	-1.51984	3.32009e-07
TraesCS1B01G205900	PHD finger family protein	1B	371451958	349.269		-1.14344	2.99e-08	-1.0987	0.0020027	-1.16491	5.38287e-05	-1.21039	0.000314052
TraesCS3D01G033500	Patatin	3D	12374275	3.91995		-1.14354	0.013649	-1.47104	0.0269879	-1.36521	0.0124647	-1.43098	0.0235946
TraesCS1D01G085800	S-adenosyl-L-methionine-dependent methyltransferases superfamily protein	1D	70119851	6.11068		-1.14364	0.00884025			-1.12929	0.0498947
TraesCS4A01G691100LC	Disease resistance protein (NBS-LRR class) family	4A	726118929	75.4974		-1.14369	1.54e-05	-1.21108	0.00756801	-1.08404	0.00352677	-1.20372	0.00523339
TraesCS1B01G083200	Retrotransposon protein, putative, Ty1-copia subclass	1B	67055517	20.3627		-1.14424	8.53e-16			-1.09215	7.47936e-09	-1.1901	1.29077e-08
TraesCS2A01G646000LC	phosphatidic acid phosphohydrolase 2	2A	722316316	4.22087		-1.14431	0.000203046			-1.15138	0.000706001	-1.10077	0.00514338
TraesCS1B01G128700	evolutionarily conserved C-terminal region 2	1B	158309305	149.89		-1.14451	1.62e-31	-1.03548	1.14625e-10	-1.11192	1.20703e-15	-1.14747	2.60242e-13
TraesCS4D01G269700	Methylenetetrahydrofolate--tRNA-(uracil-5-)-methyltransferase TrmFO	4D	441057530	92.387		-1.14483	1.56e-05			-1.22897	2.68863e-05	-1.09323	0.00163353
TraesCS7B01G418600	WRKY transcription factor	7B	686965451	8.14286		-1.14494	0.00644881			-1.48809	0.001637	-1.2642	0.0264391
TraesCS4A01G411700	Receptor kinase-like protein	4A	683912234	9.17007		-1.14506	0.000749667			-1.49094	5.92981e-05	-1.43284	0.000910866
TraesCS5A01G553600	Cytochrome P450	5A	705999676	5.20419		-1.14511	0.0171313
TraesCS1B01G112700	Sodium/hydrogen exchanger	1B	130636811	150.411		-1.14533	2.93e-19	-1.06878	2.51857e-07	-1.13823	1.42027e-10	-1.17705	5.17802e-09
TraesCS6B01G295000	Peptide transporter	6B	529773301	82.9053		-1.14564	3.85e-05			-1.36736	3.60312e-06	-1.20937	0.000523815
TraesCS1A01G035700	Protein kinase family protein	1A	19891444	7.57022		-1.14601	0.00170878			-1.44118	0.000387452	-1.38497	0.00351324
TraesCS6A01G382300	U-box domain-containing family protein	6A	601396884	59.6591		-1.14623	0.000797568			-1.45929	5.57764e-05	-1.12076	0.0109723
TraesCS1B01G146400	Ubiquitin-conjugating enzyme E2	1B	204404966	141.197		-1.14631	1.85e-32	-1.0402	1.7596e-11	-1.21476	7.99009e-20	-1.19659	2.31031e-15
TraesCS2D01G543500	Blue copper protein	2D	621312784	88.7262		-1.14737	0.000139415			-1.38033	2.13861e-05	-1.16122	0.00278102
TraesCS2B01G700200LC	DHHC-type zinc finger family protein	2B	656539203	23.5703		-1.14752	0.00436121			-1.13772	0.047826	-1.49919	0.0204579
TraesCS6D01G158100	TMV response-related protein	6D	134682612	97.8341		-1.14794	1.11e-05			-1.30723	3.52555e-06	-1.10824	0.000944343
TraesCS3D01G382400	F-box family protein	3D	498116145	7.41469		-1.1481	4.52e-09			-1.12919	9.22775e-06	-1.09652	0.000139199
TraesCS6B01G011400	Rhodanese-related sulfurtransferase	6B	6789212	7.64677		-1.14819	0.0001253					-1.44916	0.000594151
TraesCS3D01G309500	basic helix-loop-helix (bHLH) DNA-binding superfamily protein	3D	423834857	11.5783		-1.14821	0.00267287			-1.50147	0.000353983	-1.42277	0.00401131
TraesCS2D01G023100	Myrcene synthase, chloroplastic	2D	10432443	13.9599		-1.14825	0.0235391					-1.69575	0.014818
TraesCS5D01G378300	Protein DETOXIFICATION	5D	449980580	164.194		-1.14893	0.000324297	-1.09906	0.0139763	-1.48016	2.01038e-05	-1.17398	0.00503821
TraesCS7B01G396600	Receptor-kinase, putative	7B	663115928	21.7849		-1.14896	3.34e-07	-1.1934	0.00129219	-1.08581	0.000437693
TraesCS1B01G124700	Serine/threonine-protein phosphatase 4 regulatory subunit 3	1B	151081124	141.227		-1.14906	8.57e-24	-1.12276	7.34082e-09	-1.09271	1.03377e-10	-1.24299	5.42326e-11
TraesCS3A01G121900	low-molecular-weight cysteine-rich 31	3A	95894151	3.94575		-1.14915	0.0318017			-1.40357	0.0358655	-1.72208	0.0217222			-1.48481	0.0493675
TraesCS1B01G001200LC	Cysteinyl leukotriene receptor 1	1B	1199274	58.8534		-1.1492	5.07e-15	-1.03953	1.13064e-05	-1.12074	2.52141e-08	-1.19464	1.43254e-07
TraesCS2D01G184000	Disease resistance protein RGA2	2D	129268168	11.5078		-1.14924	4.09e-05	-1.07805	0.00491872	-1.38559	5.9175e-06	-1.36909	9.84853e-05
TraesCS3B01G204200LC	Aldolase superfamily protein	3B	143517324	4.38599		-1.14947	2.03e-07	-1.32311	7.60384e-05	-1.28035	1.73837e-05	-1.22468	0.000232501
TraesCS6B01G295600	Peptide transporter	6B	530850381	123.121		-1.14948	1.06e-06			-1.24837	7.80785e-07	-1.05425	0.00043202
TraesCS1B01G147200	Bidirectional sugar transporter SWEET	1B	210208856	24.6872		-1.14973	4.2e-12	-1.182	5.4124e-06	-1.3559	9.43725e-10	-1.19007	3.14531e-06
TraesCS5A01G147700	MAGUK p55 subfamily member 5	5A	325745180	47.1897		-1.15016	4.65e-06	-1.10125	0.00239922	-1.45583	4.74843e-07	-1.29232	0.000138084
TraesCS1A01G426600	Ribonucleoside-diphosphate reductase large subunit	1A	581256147	7.1177		-1.15032	0.0235098			-1.33356	0.0329561	-1.75154	0.0121954	-1.58949	0.00521979	-2.00748	0.00199631
TraesCS3A01G053500	Serine--tRNA ligase	3A	30444028	4.60938		-1.15044	0.00031172	-1.26904	0.00310426	-1.55252	9.38387e-06	-1.06375	0.0121714
TraesCS1B01G193500	general regulatory factor 10	1B	348488424	2.81553		-1.15138	0.00345828			-1.43491	0.00170517	-1.53402	0.00301905
TraesCS2B01G293100	Glutathione S-transferase tau 5	2B	408292527	5.32834		-1.15144	0.00758228			-1.53337	0.00146659	-1.5493	0.00563323
TraesCS6D01G080500	Calmodulin-binding protein-like	6D	46049048	12.6991		-1.15174	6.32e-05			-1.09788	0.00115622
TraesCS5D01G507300	Epoxide hydrolase 2	5D	532650226	74.5175		-1.15176	6.07e-11			-1.26168	3.49021e-08	-1.2732	1.18879e-06
TraesCS7A01G041600	Ozone-responsive stress-related protein	7A	19318681	82.9215		-1.15198	0.000827511	-1.54446	0.00333042	-1.07104	0.0174462	-1.50662	0.00279554
TraesCS6A01G303300LC	nitrogen fixation S (NIFS)-like 1	6A	270461572	28.7324		-1.15206	0.00120089			-1.28955	0.0100839	-1.50363	0.00908526
TraesCS1A01G065400LC	Transmembrane protein, putative	1A	29812761	2.31581		-1.15219	0.0489525			-1.72487	0.0140268
TraesCS1B01G179300LC	Aspartate--ammonia ligase	1B	119682827	29.7679		-1.15252	5.12e-06			-1.26193	9.85885e-05	-1.11212	0.00386915
TraesCS1B01G147800	Myb	1B	213901968	9.95056		-1.15261	3.36e-10	-1.28633	1.09617e-05	-1.46885	7.06546e-09	-1.32266	3.69086e-06
TraesCS3D01G233200	Tesmin/TSO1-like CXC domain-containing protein	3D	321869368	28.202		-1.15293	3.51e-07			-1.22579	0.000185586	-1.06191	0.00663438
TraesCS1B01G144000	O-acyltransferase	1B	195590715	38.3922		-1.15301	1.25e-25	-1.04497	1.05881e-09	-1.17327	3.71167e-15	-1.1539	5.01744e-12
TraesCS4A01G468900	Benzyl alcohol O-benzoyltransferase	4A	730886599	8.90158		-1.15334	0.000498294	-1.52777	0.0034519	-1.15267	0.0100027	-1.24054	0.0164597
TraesCS2A01G458000	UBiQuitin family member	2A	705880995	50.2089		-1.15403	0.0177886			-1.29727	0.0288442	-1.41084	0.0421334
TraesCS1D01G357500	Protein DETOXIFICATION	1D	441307029	2.86248		-1.15417	0.00699395			-1.71209	0.000411462
TraesCS6B01G136800LC	Muscarinic acetylcholine receptor M1	6B	78507479	13.7427		-1.15419	0.0021155			-1.2087	0.0241712
TraesCS3B01G358800	NBS-LRR disease resistance protein	3B	571300248	4.19871		-1.15467	1.73e-06	-1.32938	9.74617e-05	-1.19929	7.97651e-05	-1.04422	0.00287099
TraesCS3A01G481800	Co-chaperone protein HscB homolog	3A	712619845	1.87755		-1.15474	0.0117717			-2.03861	0.000187428	-1.64148	0.0101091
TraesCS7D01G506900	Calcium-binding protein	7D	611441715	10.3229		-1.1554	0.000308866	-1.12143	0.0125982	-1.36944	0.000116421	-1.42555	0.00050339
TraesCS6D01G061000	Respiratory supercomplex factor 1, mitochondrial	6D	28634627	206.236		-1.15549	1.54e-05			-1.32832	3.9859e-06	-1.24839	0.000218341
TraesCS3A01G489300	DUF4228 domain protein	3A	716878199	81.9619		-1.15567	4.12e-05			-1.21355	0.000102364
TraesCS1B01G251100LC	magnesium transporter 7	1B	202680227	4.04549		-1.15572	0.00501446					-1.39694	0.0238203
TraesCS1B01G102300	Armadillo/beta-catenin-like repeat family protein, expressed	1B	112357005	8.75077		-1.15577	1.29e-10			-1.17914	5.10848e-07	-1.16813	8.32504e-06
TraesCS1B01G148400	ER membrane protein complex subunit 1	1B	217283350	694.921		-1.15593	4.24e-30	-1.12096	8.33488e-12	-1.20872	1.46174e-17	-1.2257	2.70014e-14
TraesCS5B01G301200	Ral GTPase-activating protein subunit beta	5B	486034913	30.7507		-1.15618	8.82e-05			-1.35982	2.18384e-05	-1.12133	0.00341476
TraesCS7D01G010700LC	Lactoylglutathione lyase	7D	3849786	8.99194		-1.1562	0.000403997	-1.34734	0.0122082			-1.27706	0.0130101
TraesCS4D01G391600LC	Translation initiation factor IF-2	4D	456677657	6.32496		-1.15711	0.0010045			-1.47982	0.00118688	-1.87926	0.000212502
TraesCS3D01G631500LC	Thiopurine S-methyltransferase	3D	600410283	111.432		-1.15738	5.98e-05	-1.39426	0.0140973	-1.09085	0.021176	-1.18961	0.0315539
TraesCS2D01G466200	Granulocyte-macrophage colony-stimulating factor	2D	571926656	9.11416		-1.15785	0.00291696	-1.52472	0.00421789	-1.46662	0.000814505	-1.32807	0.0106315
TraesCS2D01G574100	Protein kinase family protein	2D	638807161	3.26415		-1.15806	0.00359804			-1.2499	0.00480917
TraesCS2B01G519500	Receptor-like protein kinase	2B	714492187	9.38131		-1.15836	0.0112626
TraesCS3D01G008500	Chaperone protein DnaJ	3D	2975371	84.2478		-1.15872	1.71e-10	-1.1132	7.32723e-05	-1.29537	2.87324e-08
TraesCS7D01G577800LC	F-box protein	7D	546119851	2.38744		-1.15886	0.00127674	-1.22595	0.0173915	-1.55182	0.000181867	-1.32139	0.00595243
TraesCS3A01G327700	Fatty acid oxidation complex subunit alpha	3A	572591324	24.6386		-1.15901	1.61e-05			-1.38589	3.81277e-05	-1.13022	0.00502536
TraesCS1D01G155900LC	Heat shock transcription factor	1D	110569327	11.7459		-1.15902	1.48e-06	-1.12008	0.00832479	-1.13934	0.000968544
TraesCS7D01G123700	Protein kinase family protein	7D	77176037	6.23853		-1.15903	1.16e-06	-1.11814	0.000352921	-1.12429	2.49635e-05
TraesCS2D01G544000LC	suppressor of npr1-1 constitutive 4	2D	546872140	370.807		-1.15904	6.2e-06			-1.33451	1.5353e-06	-1.16023	0.000414054
TraesCS6A01G472000LC	Xyloglucan alpha-1,6-xylosyltransferase	6A	518544927	7.72626		-1.15922	6.19e-05			-1.49195	0.000218025	-1.40077	0.00292277	-1.03311	0.00628022
TraesCS3B01G720700LC	Alanine--tRNA ligase	3B	739218001	2.721		-1.1594	0.00405456	-1.668	0.00480333	-1.41742	0.00526313
TraesCS1B01G008700	Receptor protein kinase, putative	1B	4529175	1.63373		-1.15954	0.0264925	-1.59827	0.019008							1.47105	0.0172535
TraesCS1B01G146700	heat-inducible transcription repressor	1B	206426853	74.8093		-1.15999	1.37e-31	-1.1504	4.25229e-14	-1.23428	2.4643e-20	-1.16263	1.4402e-14
TraesCS3D01G022500	Glycosyltransferase, putative	3D	7228062	15.0447		-1.16043	7.13e-11			-1.06349	8.5549e-06
TraesCS5D01G242000	Aspartic proteinase nepenthesin-1	5D	350703668	10.3168		-1.16061	8.64e-10	-1.32502	1.09831e-05	-1.06909	6.97883e-05	-1.16621	0.000119782
TraesCS1B01G248400	Threonine--tRNA ligase	1B	439442614	370.102		-1.16068	1.54e-05	-1.07866	0.00399298	-1.50109	3.52642e-07	-1.26169	0.000306109
TraesCS7A01G764400LC	LETM1 and EF-hand domain-containing protein anon-60Da, mitochondrial	7A	713759053	10.5514		-1.16076	5.82e-06			-1.19665	0.00089163	-1.29198	0.0017382
TraesCS1A01G107700	MYB-related transcription factor	1A	106216686	5.92837		-1.16137	0.00373085	-1.32777	0.0252599	-1.58364	0.000723454
TraesCS4B01G176500LC	Homeodomain-like superfamily protein	4B	172790063	18.7755		-1.16143	1.01e-06					-1.25282	0.000341175
TraesCS6B01G136200	Serine/threonine-protein kinase	6B	133439038	1.81514		-1.16153	0.0145301			-1.63107	0.0043275	-1.99259	0.00146188
TraesCS1B01G273200LC	Retrovirus-related Pol polyprotein from transposon TNT 1-94	1B	231627624	16.5013		-1.16188	1.15e-08	-1.18373	0.000341325	-1.10456	7.99774e-05
TraesCS7B01G003600LC	NBS-LRR disease resistance protein-like protein	7B	1349434	3.97833		-1.16195	0.0149801			-1.31581	0.0315087
TraesCS1B01G238900LC	Transposase	1B	184985353	2.56305		-1.16208	0.0347952
TraesCS1A01G027600	Elongation factor	1A	13081412	138.189		-1.16224	8.55e-05	-1.2015	0.0168573	-1.19207	0.00312385	-1.14843	0.0166566
TraesCS6D01G117400LC	Polynucleotidyl transferase, ribonuclease H-like superfamily protein	6D	63930101	10.9122		-1.16231	4.24e-12	-1.19059	9.18255e-07	-1.25832	3.46401e-09	-1.06199	1.42844e-05
TraesCS4A01G467400LC	Pol polyprotein	4A	603065338	3.64078		-1.16242	0.00226281			-1.31006	0.0103028	-1.64086	0.00348887
TraesCS1B01G071400	Nuclear factor related to kappa-B-binding protein	1B	56310409	120.865		-1.16244	3.03e-24	-1.07058	4.82825e-10	-1.13769	2.11812e-14	-1.34941	4.84538e-16
TraesCS5A01G500700LC	zinc finger MYM-type-like protein	5A	560461191	7.49623		-1.16268	0.000338447			-1.39327	0.000805162	-1.46956	0.00208808
TraesCS6B01G243800	Pentatricopeptide repeat-containing protein	6B	433707331	12.63		-1.16305	3.35e-15	-1.41988	2.2148e-09	-1.37368	1.35099e-10	-1.51302	7.46909e-11
TraesCS6A01G219700LC	Histone H3	6A	144493201	8.55978		-1.16347	0.000318472	-1.39356	0.0125417	-1.43238	0.00152657	-1.59919	0.00195901
TraesCS4B01G491900LC	Multiple C2 and transmembrane domain-containing protein 1	4B	591240815	3.10915		-1.16348	0.000460936	-1.32859	0.0125792	-1.36953	0.00197138
TraesCS6A01G076600	F-box domain containing protein, expressed	6A	46782403	22.0949		-1.16358	8.36e-05	-1.15038	0.00811163	-1.4634	1.97861e-05	-1.2821	0.00157361
TraesCS2A01G577500	Pentatricopeptide repeat-containing family protein	2A	771507590	2.90988		-1.16366	0.0163918					-1.40164	0.0474349
TraesCS1B01G126100	Disulfide-isomerase	1B	154153639	1231		-1.16386	1.47e-29	-1.10786	6.09968e-11	-1.17724	7.67078e-16	-1.21174	2.69623e-13
TraesCS7B01G311000LC	Retrovirus-related Pol polyprotein from transposon TNT 1-94	7B	293074621	10.9136		-1.16398	0.00137543	-1.06338	0.0493749	-1.61275	8.12257e-05	-1.69735	0.000313239
TraesCS6B01G051900	Cytochrome P450	6B	31014700	3.62875		-1.16468	0.000373313			-1.24973	0.000569924	-1.45727	0.0002926
TraesCS1B01G047700	Mitochondrial transcription termination factor-like	1B	27674855	27.7962		-1.16528	0.0239517
TraesCS3B01G198100LC	Gypsy/Ty3 element polyprotein, putative	3B	135707019	14.9653		-1.1653	0.0141651	-1.57	0.0466801
TraesCS6B01G540600LC	multiple organellar RNA editing factor	6B	518599601	10.177		-1.16533	1.93e-09	-1.14361	0.000307585	-1.25508	2.58669e-06	-1.10294	0.000364895
TraesCS2B01G062000LC	Transposon protein, putative, Mutator sub-class, expressed	2B	29754024	1.5163		-1.16566	0.0205271	-1.51782	0.0468602	-1.68255	0.00650824
TraesCS3D01G617700LC	Expressed protein-RZ53	3D	594800553	155.085		-1.16567	0.000370534	-1.16798	0.00989077	-1.53624	1.42659e-05	-1.31158	0.00186969
TraesCS6D01G158000	TMV response-related protein	6D	134676522	15.3942		-1.1657	2.98e-05			-1.35777	6.84596e-06	-1.14807	0.00130111
TraesCS1B01G085200	p-loop containing nucleoside triphosphate hydrolases superfamily protein	1B	69902507	135.19		-1.16585	6.75e-35	-1.09918	9.69841e-14	-1.27358	2.74121e-23	-1.22457	3.89419e-17
TraesCS6D01G005700	casein kinase I	6D	2439022	2.57183		-1.16589	0.00847103			-1.62181	0.00516564	-1.46193	0.0309713
TraesCS4A01G382600	F-box protein	4A	660766792	4.24093		-1.16592	6.88e-05			-1.41092	0.000124718	-1.36827	0.00108551
TraesCS2D01G662500LC	Blue copper protein	2D	621315601	68.0535		-1.16627	6.44e-05			-1.43963	3.19503e-06	-1.18555	0.00129694
TraesCS1B01G049200	Inorganic pyrophosphatase family protein	1B	28764433	50.7076		-1.16644	7.99e-15	-1.22592	8.98197e-07	-1.17311	6.47161e-08	-1.08891	1.41032e-05
TraesCS5D01G478200	Acetyl-coenzyme A carboxylase carboxyl transferase subunit alpha	5D	517054083	9.02833		-1.16657	1.9e-05			-1.17021	0.000318835
TraesCS3A01G601600LC	HAT family dimerisation domain containing protein	3A	691599371	5.84227		-1.16687	0.00307318	-1.39114	0.0292369	-1.28383	0.0142207	-1.37399	0.0230365
TraesCS3B01G644600LC	Trigger factor	3B	683426935	5.151		-1.16747	0.00022309	-1.09962	0.0318717			-1.42022	0.00203616
TraesCS7A01G232400LC	RING/U-box superfamily protein	7A	127581162	6.47295		-1.16768	4.94e-05			-1.34377	0.000266212	-1.14668	0.00836004
TraesCS1B01G007600	APOLLO	1B	4219904	4.19959		-1.16801	0.00156986	-1.23343	0.0370954	-1.21553	0.0118427	-1.15021	0.0425807
TraesCS3B01G452600LC	GTP-binding nuclear protein	3B	467055021	8.2116		-1.16856	0.0143032
TraesCS6A01G434300LC	Patatin	6A	479107853	5.43037		-1.16877	2e-05	-1.27815	0.00268151	-1.23393	0.000575125	-1.44902	0.000273097
TraesCS6B01G085500	TBP-associated factor 4	6B	62154647	27.359		-1.16919	0.00029548			-1.44059	3.62693e-05	-1.16713	0.00533744
TraesCS7D01G080600	Lectin receptor kinase	7D	47457549	58.8286		-1.16925	8.15e-13			-1.35816	6.1925e-13	-1.23265	1.36889e-08
TraesCS6B01G534000LC	Transposon Ty3-G Gag-Pol polyprotein	6B	512201976	40.353		-1.16939	0.00570122
TraesCS5A01G478400	Zinc finger protein	5A	651788351	6.49697		-1.16973	0.000956998	-1.11903	0.0245213	-1.3698	0.000464922	-1.19753	0.00991736
TraesCS7D01G410000	TCP family transcription factor 4	7D	529040257	140.986		-1.17018	1.94e-05	-1.00643	0.00847975	-1.27222	2.30074e-05	-1.02387	0.00464046
TraesCS1B01G128600	GDSL esterase/lipase	1B	157934684	256.312		-1.17067	1.71e-26	-1.1352	1.65085e-10	-1.22123	1.5563e-15	-1.24028	9.76225e-13
TraesCS5A01G435500LC	Retrovirus-related Pol polyprotein from transposon TNT 1-94	5A	513640459	2.46471		-1.17087	0.0430265			-1.68117	0.0134711	-1.84441	0.0175997
TraesCS5A01G544200LC	Protein FAR1-RELATED SEQUENCE 5	5A	590242947	8.06646		-1.17105	0.000717169	-1.08134	0.0301706	-1.4017	0.000303955	-1.43751	0.00135165
TraesCS1B01G144300LC	NADH dehydrogenase subunit F	1B	88755435	14.1805		-1.17106	0.000415169	-1.58252	0.00226159	-1.08938	0.0154113	-1.15855	0.0268359
TraesCS2A01G258600	Blue copper protein	2A	406662505	28.371		-1.17125	2.7e-05			-1.43928	2.93186e-06	-1.26878	0.000464893
TraesCS5A01G556100LC	Electron transfer flavoprotein-ubiquinone oxidoreductase, mitochondrial	5A	598249219	12.0733		-1.17127	0.0246312
TraesCS3D01G508800	Protein transport protein sec72	3D	594772285	102.193		-1.17158	0.00134612			-1.44874	0.000257705	-1.03753	0.0351089
TraesCS7B01G670400LC	transmembrane protein, putative (DUF679)	7B	665525846	20.8932		-1.17179	4.55e-06	-1.04808	0.00424153	-1.26956	1.48263e-05	-1.01575	0.00380234
TraesCS2B01G481700	GPI mannosyltransferase 2	2B	679896070	40.6875		-1.17239	9.56e-10	-1.30226	1.63311e-05	-1.21274	3.10105e-06
TraesCS1B01G126200	tRNA (Guanine(26)-N(2))-dimethyltransferase	1B	154157989	12.896		-1.17255	2.84e-15	-1.19606	2.34362e-07	-1.26898	6.06276e-10	-1.3031	6.51053e-09
TraesCS6B01G456700LC	zinc finger nuclease 2	6B	420841013	4.48052		-1.1726	0.00605493	-1.69591	0.013624	-1.37262	0.0185599
TraesCS4A01G430400	Receptor-like protein kinase	4A	701757477	2.91694		-1.17282	0.000306801	-1.32214	0.00336275	-1.34876	0.000373513	-1.32002	0.00218382
TraesCS1B01G018900	Ras-related protein, expressed	1B	8946400	35.9324		-1.17328	6.31e-21			-1.15245	6.41488e-12	-1.03744	6.6255e-08
TraesCS1B01G126900	Chlororespiratory reduction31	1B	155438401	96.0322		-1.17332	2.45e-19	-1.2594	4.51679e-10	-1.19494	1.40726e-11	-1.17066	6.36517e-09
TraesCS7D01G497700	WRKY transcription factor	7D	604475213	26.2379		-1.17347	0.00208941			-1.52727	0.000292133	-1.46277	0.00324942
TraesCS3A01G678800LC	UPF0482 protein YnfB	3A	725566003	7.21795		-1.17366	0.0146221	-1.79629	0.00730081			-1.73025	0.00685803
TraesCS7A01G264000LC	ROP uanine nucleotide exchange factor 10	7A	165068198	2.82048		-1.17371	0.0116935	-2.04857	0.00233116	-1.27744	0.037552
TraesCSU01G021300LC	Kinase, putative	Un	12518037	4.89015		-1.17382	0.0212851
TraesCS1B01G159100LC	S-adenosyl-L-methionine-dependent methyltransferases superfamily protein	1B	100990747	90.8494		-1.17425	6.93e-08	-1.009	0.00606311	-1.16836	6.66998e-05	-1.14358	0.000879203
TraesCS2A01G482200	Anthocyanidin reductase	2A	718916691	35.683		-1.1743	4.57e-05	-1.48957	0.000286375	-1.46642	1.94578e-05	-1.93916	3.75831e-07
TraesCS6B01G391700LC	pachytene checkpoint-like protein	6B	334868841	17.5223		-1.17467	3.18e-12	-1.3502	3.93345e-06	-1.18926	4.06622e-06	-1.19449	4.91427e-05
TraesCS3D01G023000	Glycosyltransferase	3D	7287230	114.993		-1.17487	1.01e-11	-1.21474	9.65748e-06	-1.28751	3.11187e-08	-1.07931	8.3907e-05
TraesCS5D01G629200LC	Purple acid phosphatase	5D	548531371	9.92219		-1.17511	6.84e-07	-1.18177	0.00209738	-1.22782	0.000109676
TraesCS5D01G054800	Glutaredoxin family protein	5D	51847144	4.96472		-1.17575	0.000207093	-1.06655	0.044271	-1.17407	0.00561438	-1.26011	0.00908661
TraesCS3B01G139700LC	Transposon Ty3-G Gag-Pol polyprotein	3B	79523609	4.18623		-1.17576	0.0449256
TraesCS5B01G063600	Receptor-like protein kinase	5B	71514312	13.2527		-1.17604	0.00109347			-1.19969	0.00897884
TraesCS3D01G018200	Pentatricopeptide repeat-containing protein	3D	6146778	17.6477		-1.17614	2.86e-12	-1.28345	1.78469e-06	-1.32033	1.79925e-08	-1.23259	3.85325e-06
TraesCS2B01G553200	F-box family protein	2B	748946440	2.46187		-1.17617	0.00514215			-1.22316	0.0156695	-1.2407	0.0337256
TraesCS3D01G617400LC	ATPase E1-E2 type family protein / haloacid dehalogenase-like hydrolase family protein	3D	594638602	119.064		-1.17644	0.0013606			-1.41491	0.000433111	-1.16675	0.0167931
TraesCS3B01G152200	Glutathione S-transferase	3B	144056906	543.337		-1.17647	3.98e-13	-1.26659	1.50715e-07	-1.38419	1.60334e-11	-1.46403	3.4685e-10
TraesCS1B01G036600	acetyl Co-enzyme a carboxylase carboxyltransferase alpha subunit	1B	17387167	2.30377		-1.17721	0.0223802
TraesCS1B01G449300	RADIALIS-like transcription factor	1B	667996875	3.59568		-1.17756	0.00012989	-1.23336	0.0105265	-1.03437	0.0125168
TraesCS3D01G018800	Peroxisomal membrane protein PEX14	3D	6339982	182.211		-1.17785	2.77e-12	-1.25268	2.4901e-06	-1.26295	2.87168e-08	-1.05904	8.0734e-05
TraesCS1A01G410400	Calcium-binding site, putative	1A	571679825	64.7753		-1.17799	3.8e-05	-1.06831	0.00699507	-1.37113	1.13007e-05	-1.12751	0.00254359
TraesCS6B01G325100LC	Peroxisomal membrane protein, putative, expressed	6B	255076379	62.3407		-1.17803	0.000365858	-1.2695	0.03496	-1.14309	0.0192072
TraesCS3B01G561700	Phospholipase A1	3B	795176384	1.60603		-1.17823	0.0478102			-1.60407	0.0306201
TraesCS2A01G541100	Exocyst complex component 7	2A	752767918	32.8384		-1.17878	3.37e-05	-1.09772	0.00433869	-1.48745	1.00882e-06	-1.05717	0.00414137
TraesCS4D01G102900	Expressed protein-RZ53	4D	81917166	192.271		-1.17978	2.71e-06	-1.00052	0.00579341	-1.38734	1.07237e-06	-1.21403	0.000298889
TraesCS5D01G491700	Zinc finger protein	5D	525388513	4.52288		-1.17993	0.00349632	-1.42428	0.0127554	-1.56838	0.000670925	-1.36192	0.012691
TraesCS7A01G031700	Asparagine--tRNA ligase	7A	13177300	290.874		-1.17996	2.06e-05	-1.04043	0.00640163	-1.36236	5.69092e-06	-1.20513	0.000698549
TraesCS1B01G126500	Importin subunit alpha	1B	154594664	876.189		-1.18003	1.29e-32	-1.15924	2.36064e-13	-1.21737	7.70625e-19	-1.25867	6.86972e-16
TraesCS3B01G720600LC	F-box domain containing protein, expressed	3B	739215738	6.40217		-1.18004	0.0024217	-1.48211	0.0147145	-1.35063	0.00700404
TraesCSU01G155100LC	ABC transporter C family protein	Un	84244273	114.24		-1.18033	0.00573291
TraesCS3D01G023100	Glycosyltransferase	3D	7336477	17.8162		-1.18085	2.38e-05	-1.26689	0.00571291	-1.46863	6.30951e-05	-1.19757	0.00650913
TraesCS1B01G096900	Peroxidase	1B	101221223	193.164		-1.18111	4.97e-09	-1.42093	1.02871e-05	-1.14223	4.41567e-05	-1.16451	0.000353911
TraesCS1B01G117200	SKP1-like protein 4	1B	137445193	69.5203		-1.18115	1.17e-11			-1.2705	7.74355e-08	-1.13869	3.64505e-05
TraesCS1B01G464800	ATP-dependent zinc metalloprotease FtsH	1B	676066808	16.2918		-1.18127	2.8e-05	-1.05593	0.00730081	-1.3728	1.02089e-05	-1.13783	0.00207921
TraesCS1D01G528600LC	Cysteine proteinase inhibitor	1D	465963491	2.56741		-1.18141	0.0410038			-1.53936	0.034916
TraesCS5D01G401900LC	plant intracellular ras group-related LRR 4	5D	412942990	1.69003		-1.1818	0.0151584			-1.5973	0.00619305	-1.80674	0.00537524
TraesCS7A01G199700	gibberellic acid methyltransferase 2	7A	162513176	89.1835		-1.18207	5.01e-05	-1.05429	0.00969572	-1.43134	6.77614e-06	-1.17861	0.00192204
TraesCS6A01G041300	Peptide transporter	6A	21634810	2.51644		-1.18217	0.00956665
TraesCS7D01G618200LC	P-loop containing nucleoside triphosphate hydrolases superfamily protein	7D	570764258	8.97743		-1.18243	0.0105067					-1.44169	0.0498317
TraesCS2A01G059100	TTF-type zinc finger protein with HAT dimerization domain-containing protein	2A	25045155	10.1542		-1.18265	1.41e-05			-1.3446	0.000130744	-1.08693	0.00977339
TraesCS5A01G515900LC	Transposon Ty3-I Gag-Pol polyprotein	5A	568271420	10.5157		-1.1829	4.61e-09	-1.35378	3.17751e-05	-1.36002	1.44458e-06	-1.35568	2.08204e-05
TraesCS2D01G026600	Protein kinase family protein	2D	11218166	37.0948		-1.18306	3.56e-06	-1.47534	0.000110489	-1.17575	0.000341674
TraesCS7B01G106400	DWNN domain, a CCHC-type zinc finger	7B	123311078	190.06		-1.18308	1.64e-05			-1.35466	4.63987e-06	-1.19708	0.00062571
TraesCS5D01G107200	Glutaredoxin family protein	5D	120888375	2.35076		-1.18341	0.00149567			-1.12307	0.0170934	-1.24852	0.0178315
TraesCS4A01G497000LC	Zinc finger MYM-type protein 5	4A	617932275	1.95388		-1.18342	0.0364949							-1.43932	0.035604
TraesCS2B01G282600	Nuclear transport factor 2 (NTF2)-like protein	2B	390975099	12.2322		-1.18365	1.24e-14					-1.16098	2.58597e-06
TraesCS4B01G392100	transmembrane protein, putative (DUF247)	4B	667548458	4.67592		-1.184	0.000711499	-1.15299	0.0187191	-1.15246	0.0039712	-1.26748	0.00542258
TraesCS3B01G144500	Glycosyltransferase	3B	132976441	12.3138		-1.18407	0.000248444			-1.43076	5.58689e-05	-1.25384	0.00285311
TraesCS3D01G517900	60S ribosomal protein L38	3D	600640261	97.659		-1.18423	1.29e-21	-1.23618	7.24643e-08	-1.19968	1.7149e-09	-1.18748	1.88787e-07
TraesCS1B01G104000	F-box family protein	1B	113816235	3.8743		-1.18443	0.000892572	-2.25026	5.86642e-06	-1.2977	0.00644882	-1.49851	0.00453857
TraesCS1D01G399400	protein kinase family protein	1D	465978932	7.77226		-1.18443	1.87e-05	-1.38178	0.00035353	-1.44029	1.01308e-05	-1.09715	0.00484865
TraesCS5A01G300000LC	F-box/kelch-repeat protein At3g61590	5A	382960128	16.32		-1.18486	5.84e-05	-1.14847	0.00411007	-1.3867	1.53071e-05	-1.15852	0.00236751
TraesCS2D01G081500	MLO-like protein	2D	35022526	63.9262		-1.18501	5.51e-06			-1.37211	8.58673e-07	-1.30571	5.58571e-05
TraesCS3B01G021000	Leucine--tRNA ligase	3B	8804355	81.1055		-1.18509	9.68e-10	-1.17622	0.000107337	-1.14136	8.53246e-06	-1.20869	4.10604e-05
TraesCS2A01G332900	Heavy metal transport/detoxification superfamily protein	2A	565373091	8.44877		-1.18516	0.00229072	-1.36021	0.0131001	-1.59709	0.000244235
TraesCS5A01G722600LC	cAMP-dependent protein kinase regulatory subunit	5A	698781042	22.127		-1.18584	0.00467668			-1.15741	0.0484805
TraesCS7A01G150100LC	spindle pole body-associated protein	7A	67558444	2.92714		-1.18607	0.0489042
TraesCS7A01G352100	Ring finger protein, putative	7A	515226451	102.379		-1.18607	9.17e-07	-1.10902	0.00059862	-1.35193	2.66961e-07	-1.25182	4.36612e-05
TraesCS1B01G123100	RING/U-box superfamily protein	1B	148471520	233.318		-1.18608	1.48e-25	-1.12875	3.38585e-10	-1.34357	2.56943e-18	-1.29248	1.60931e-13
TraesCS7B01G605600LC	S-adenosylmethionine synthase	7B	621458894	34.0242		-1.18633	6.92e-05	-1.15847	0.0420411	-1.27725	0.00432499	-1.18551	0.0266819
[truncated: 6,387 more rows]

## Sheet: TableS5.2
Table S5.2 Genes differentially expressed between resistance groups after Mock treatment
		Chrom	Start		Sumai3|nonSumai3			Sumai3|Resistant			Sumai3|Moderate Resistant			Sumai3|Susceptible			Resistant|Moderate Resistant			Resistant|Susceptible			Moderate Resistant|Suscedptible
GENE ID	Human readable gene description				baseMean	log2FC	padj	baseMean	log2FC	padj	baseMean	log2FC	padj	baseMean	log2FC	padj	baseMean	log2FC	padj	baseMean	log2FC	padj	baseMean	log2FC	padj
TraesCS5B01G014800	Terpene synthase	5B	13919352		215.832	14.7905	2.50795e-10
TraesCS2B01G216900	CsAtPR5	2B	203902727		14.2071	8.97087	0.00295495
TraesCS4B01G085000	3-deoxy-manno-octulosonate cytidylyltransferase	4B	85361945		12.6973	8.69823	8.57552e-05	33.6526	9.1179	0.000991628	15.9313	8.82708	2.76512e-05	33.8086	9.12546	0.000295068
TraesCS6B01G654100LC	Metastasis-associated protein MTA1	6B	632230841		9.22575	8.34801	0.0060574
TraesCS6B01G242200	tRNA/tmRNA (uracil-C(5))-methyltransferase	6B	426826775		9.11063	8.18114	2.08902e-05	19.803	8.35304	0.0207818	9.39687	8.0628	0.00561444	19.9351	8.20059	0.00142873
TraesCS2B01G217000	rRNA N-glycosidase	2B	204776776		6.76214	7.89981	0.00966781
TraesCS7B01G576400LC	Cleavage stimulation factor subunit 3	7B	601135067		7.31803	7.86353	0.000573523
TraesCS6B01G126100LC	DNA helicase	6B	70037772		6.67547	7.7673	0.00042276
TraesCS5A01G176600LC	SPOC domain / Transcription elongation factor S-II protein	5A	193888982		4.89006	7.43228	0.000103342	15.11	7.95744	3.88404e-49	7.12296	7.85939	4.0731e-100	15.1841	7.96532	1.19157e-49
TraesCS6B01G463800LC	D-arabinono-1,4-lactone oxidase family protein	6B	428248555		5.01599	7.3924	0.000352404	10.494	7.43697	0.0388786	4.98346	7.21065	0.0446441	10.5432	7.44462	0.015214
TraesCS2B01G217100	CsAtPR5	2B	204916026		4.70812	7.37749	0.0166257
TraesCS5A01G332600LC	Serine protease HTRA1	5A	425004681		4.42566	7.21013	6.7523e-05	12.71	7.71212	1.71346e-20	6.01027	7.54927	9.96077e-13	12.8096	7.55949	2.5667e-21
TraesCS6B01G238800LC	Histone-lysine N-methyltransferase	6B	159541756		4.89072	7.20445	4.56149e-05	9.8367	7.34345	0.0428869	4.69186	7.05237	0.00414039	9.95004	6.8706	0.0100788
TraesCS4B01G395200	FKBP-type peptidyl-prolyl cis-trans isomerase family protein	4B	669472683		6.81385	7.15199	9.59999e-07
TraesCS1B01G736800LC	Disease resistance protein (NBS-LRR class) family	1B	660913464		4.46189	7.10536	0.000308918
TraesCS5A01G154600LC	Stress-associated endoplasmic reticulum protein 2	5A	155211668		9.88163	7.09585	1.01761e-09	29.3115	6.16884	2.63842e-07	13.6044	8.2664	1.94407e-113	28.7556	8.72627	9.91584e-59
TraesCSU01G042000	disease resistance protein (TIR-NBS-LRR class)	Un	34214519		3.70627	6.95292	0.000140238	11.5031	7.57093	1.72766e-30	5.44765	7.40725	1.55347e-34	11.5905	7.41844	3.52083e-30
TraesCS3B01G005000	receptor kinase 1	3B	3016080		3.47163	6.93808	0.00814686	11.0371	7.50891	2.58961e-19	5.20153	7.40966	3.69645e-09	11.0916	7.5169	1.28217e-19
TraesCS5A01G211300LC	stress response NST1-like protein	5A	257282460		2.9853	6.72044	3.28061e-05	8.68931	7.16347	1.62983e-35	4.0957	7.06438	1.47463e-59	8.72877	7.17092	5.96583e-36
TraesCS1B01G754000LC	hAT transposon superfamily	1B	669245478		4.2183	6.71016	7.99692e-10
TraesCS5A01G164800	chlorophyll A/B-binding protein 2	5A	353597941		8.25273	6.6181	0.0105811
TraesCS5A01G314000LC	D-alanine-D-alanine ligase family	5A	402120641		2.48118	6.32991	1.35958e-05	7.54451	6.96037	5.22682e-17	3.59231	6.73343	7.75068e-12	7.616	6.80812	1.21551e-17
TraesCS7B01G339000	Glutamate dehydrogenase	7B	593342210		2.8424	6.32283	7.19283e-05
TraesCS6B01G462700LC	NAC domain containing protein 16	6B	425606614		2.10939	6.17778	0.00185387	4.92671	6.17734	0.00403108				4.9181	6.3448	0.0366755
TraesCS1D01G202100LC	Transposon Ty3-I Gag-Pol polyprotein	1D	179138126		3.83912	6.15465	2.96254e-06				3.10314	6.15539	0.000849635	6.41679	6.38966	0.000181159
TraesCS1D01G063300LC	Pectin lyase-like superfamily protein	1D	33761208		1.88901	6.05985	0.00614517
TraesCS5B01G062900	DNA topoisomerase 2	5B	70560030		2.64916	5.99702	1.51181e-05
TraesCSU01G135900	ATP binding protein, putative	Un	121123132		20.0884	5.9835	4.02817e-54	55.5136	6.09555	3.47174e-107	26.7033	6.56286	6.26558e-151	55.5562	6.2693	1.54778e-106
TraesCS2B01G623800LC	Translation initiation factor IF-2	2B	583396223		1.82639	5.96553	0.00884047
TraesCS6B01G500600LC	Retrotransposon protein, putative, Ty1-copia subclass	6B	469789393		2.99061	5.90033	0.0209429	6.5805	6.76375	0.000123059				6.61338	6.77184	3.44539e-05
TraesCS5A01G314100LC	Translation initiation factor IF-2	5A	402122617		1.57956	5.80216	0.00317055	4.36873	6.17256	5.6185e-12	2.05965	6.07331	4.44072e-05	4.39023	6.18052	3.15823e-12
TraesCS6D01G402500	70 kDa heat shock protein	6D	470902210		6.31678	5.78308	0.0206867				5.28726	7.43341	0.0026342
TraesCS3B01G228000LC	TPX2 (targeting protein for Xklp2) protein family	3B	168698478		1.48109	5.70956	0.0275082	5.07408	6.39032	2.0053e-07	2.39362	6.29063	0.000848934	5.0972	6.39781	8.3301e-08
TraesCS5A01G333000LC	S-adenosylmethionine synthase	5A	425328572		2.05622	5.64679	0.00202858	5.60888	6.53224	4.83581e-16	2.64446	6.43372	3.01301e-06	6.18775	4.45596	0.00270981
TraesCS2A01G563900	Receptor-kinase, putative	2A	764308980		5.11098	5.57128	2.69743e-11
TraesCS6B01G582100LC	RNA chaperone ProQ	6B	560991268		1.77206	5.53373	0.000145558
TraesCSU01G207200LC	Auxin-induced protein	Un	112451869		2.24122	5.53041	0.000957665
TraesCS1B01G439100	Disease resistance protein (TIR-NBS-LRR class) family	1B	660914515		4.81157	5.52173	2.45585e-10
TraesCS7B01G398700	cyclin-dependent kinase inhibitor	7B	664968316		1.30053	5.52151	0.0361293
TraesCS6D01G511300LC	NBS-LRR disease resistance protein-like protein	6D	468920835		2.53983	5.49925	0.00361237				2.247	6.19913	0.0112326	4.7844	6.30523	0.000133034
TraesCS3B01G030400LC	TSA: Wollemia nobilis Ref_Wollemi_Transcript_4460_1009 transcribed RNA sequence	3B	12034574		1.9922	5.49145	1.21307e-08	5.49437	5.65636	1.19237e-09	2.67761	5.78101	2.81548e-16	5.38547	6.3052	6.58261e-14
TraesCS6B01G627500LC	Protein FAR1-RELATED SEQUENCE 5	6B	611447830		1.39661	5.44287	0.0159937
TraesCS3B01G030500LC	telomerase reverse transcriptase	3B	12035409		1.41713	5.41171	0.000187129	3.79053	5.7955	3.05844e-07	1.82971	5.66391	1.19278e-05	3.82232	5.80313	1.34183e-07
TraesCS2B01G598300	F-box family protein	2B	781149316		2.95255	5.40164	1.21741e-06
TraesCS3D01G631600LC	Anthocyanin 5-aromatic acyltransferase	3D	600492775		6.09198	5.39655	9.39658e-32	12.1154	5.28823	5.44485e-12	6.01454	5.58985	4.95874e-19	12.3521	4.92818	8.38486e-10
TraesCS1B01G670100LC	AT hook motif-containing protein, putative	1B	628627199		3.04513	5.38473	0.00204211
TraesCSU01G199500	Pseudo-response regulator	Un	297413757		2.11891	5.36492	0.0176213
TraesCS5A01G210500	Serine protease HtrA-like	5A	425453904		27.2344	5.34972	0.000252427	69.3635	8.84721	1.20561e-22	32.8745	8.83007	1.55983e-49	71.4021	6.1142	1.73532e-05
TraesCS6B01G463700LC	Replication A 70 kDa DNA-binding subunit	6B	427758487		2.0631	5.2921	4.14813e-07	4.76081	5.7939	0.000701562	2.40403	5.46988	4.03412e-05	4.94977	5.14664	0.000351552
TraesCS3B01G204400LC	Annexin	3B	143527704		1.14055	5.28945	0.0281804
TraesCS6B01G275800LC	Double Clp-N motif-containing P-loop nucleoside triphosphate hydrolases superfamily protein	6B	201200287		2.45162	5.27206	0.0359597	4.84246	6.32093	0.000833387
TraesCS5A01G340100LC	exocyst complex component sec10	5A	431570985		1.09181	5.26891	0.0103703
TraesCS6B01G699900LC	CWF19-like protein 2	6B	660376452		1.14465	5.23987	0.00656819
TraesCS6B01G462600LC	S-adenosyl-L-methionine-dependent methyltransferases superfamily protein	6B	425604146		1.05235	5.21647	0.0285093
TraesCS6A01G294700	Protein kinase	6A	528919762		2.75645	5.20222	0.000741491	5.53555	4.9608	0.0196941	2.89139	4.84424	0.0356173	5.35895	6.12419	1.36451e-06
TraesCS3B01G030200LC	ATP-dependent DNA helicase pif1	3B	12029980		2.23381	5.20122	7.99518e-12	5.68953	5.37741	1.86244e-07	2.82815	5.42669	6.15588e-11	5.62069	5.85767	4.20925e-08
TraesCS6B01G685000LC	Arginine--tRNA ligase	6B	650777150		5.96165	5.18696	0.0196617
TraesCS4D01G354000LC	Sentrin-specific protease	4D	422224823		0.983978	5.06821	0.00785476
TraesCS6B01G242100	tRNA/tmRNA (uracil-C(5))-methyltransferase	6B	426736276		0.932138	5.04088	0.0368346
TraesCSU01G012600	NBS-LRR disease resistance protein-like protein	Un	15914899		24.3677	4.92363	2.92697e-10	38.3645	5.36751	1.44094e-05	22.2093	4.12463	0.00120463	38.1613	5.77914	7.39325e-07
TraesCS1B01G439200	NBS-LRR-like resistance protein	1B	660961899		5.31157	4.84196	1.45946e-11				4.904	4.36956	8.12411e-05
TraesCSU01G012800	NBS-LRR disease resistance protein-like protein	Un	15965003		3.92696	4.77901	0.00650536	6.14101	6.15222	0.000423146				6.115	6.32121	0.000247995
TraesCS7A01G773100LC	Transposon Ty3-I Gag-Pol polyprotein	7A	719489909		1.2922	4.77513	0.0076463
TraesCS6D01G516300LC	Scavenger receptor class A member 5	6D	470420049		1.91168	4.76803	2.00742e-06
TraesCS6B01G196400	Nucleotide-binding, alpha-beta plait	6B	232744484		1.49336	4.76501	2.323e-05	3.44998	4.62775	0.00482548				3.35238	5.09187	0.00178698
TraesCS2B01G331200LC	Transposase	2B	244701420		2.70482	4.74643	0.00208466
TraesCS2B01G075200	Receptor-like protein kinase	2B	40904243		1.49468	4.74168	0.00623694
TraesCS4B01G132300	Alpha-L-arabinofuranosidase 1	4B	172388854		61.2936	4.70097	5.29751e-08	139.099	6.94322	1.65129e-15	80.8945	4.29994	0.00141853	139.523	7.06826	2.25119e-13
TraesCS6B01G275700LC	P-loop containing nucleoside triphosphate hydrolases superfamily protein	6B	201199788		1.44811	4.67882	0.0177782
TraesCS1D01G271500LC	Cardiolipin synthase B	1D	246674647		0.954388	4.64429	0.0288494
TraesCS6B01G242400	Epidermal p-coumarate 3-hydroxylase	6B	430188434		7.75502	4.61444	1.2726e-24	14.7316	4.30651	5.54058e-05	7.64493	4.54506	2.03662e-13	14.415	4.79069	2.3375e-05
TraesCS6B01G685200LC	CENP-C	6B	650787704		2.12341	4.49397	0.0470609
TraesCS7B01G038400	3'-N-debenzoyl-2'-deoxytaxol N-benzoyltransferase	7B	37419989		2.43762	4.4392	0.0408121				1.97188	5.15814	0.0194877	3.78966	5.96765	0.00713994
TraesCS4B01G308900	Alanine--tRNA ligase	4B	599550194		21.3586	4.31583	4.07884e-05				8.63645	3.84429	4.02198e-05
TraesCS2B01G832800LC	Cysteine-rich receptor-kinase-like protein	2B	753664905		1.73423	4.31279	0.0170315
TraesCS3B01G272000LC	Transposon Ty3-I Gag-Pol polyprotein	3B	219479004		2.38685	4.27029	0.0224743				2.37967	5.98062	1.08515e-07
TraesCS3A01G674500LC	Transposon protein, putative, CACTA, En/Spm sub-class, expressed	3A	724158974		1.77119	4.17156	9.13883e-06
TraesCS7B01G052400LC	Mitochondrial transcription termination factor-like	7B	32345396		1.42603	4.16809	2.44152e-09
TraesCS1B01G035400	Disease resistance protein (NBS-LRR class) family	1B	16839553		1.19602	4.12895	0.0494272				1.55985	5.42715	0.0014449	3.37339	5.08473	0.00067311
TraesCS3B01G193500	Vesicle-associated membrane protein, putative	3B	212884092		23.4018	3.99098	1.81852e-06	52.844	5.02451	9.22726e-07	25.1631	6.10641	5.36438e-27	52.6217	5.25361	8.53426e-11
TraesCS3B01G459500LC	CCAAT-binding transcription factor	3B	473397277		3.3997	3.92547	0.0136559	6.54447	6.42152	3.68886e-06	3.49036	5.086	0.00903879
TraesCSU01G533800LC	Glycosyltransferase	Un	370635126		4.74843	3.91482	0.0019618				4.94777	4.54237	0.00373555	9.8059	3.93853	0.0113789
TraesCS3B01G023000LC	hAT transposon superfamily	3B	9062143		24.1957	3.842	2.70229e-07	58.4958	3.96544	7.38201e-05	29.7398	4.52928	2.85195e-07	58.7329	3.97527	2.60383e-19
TraesCS1B01G033700	Benzyl alcohol O-benzoyltransferase	1B	16426497		1.43245	3.81883	0.000388838				1.91577	4.62548	1.52981e-07	3.51525	5.50493	2.75812e-06
AML47763	Oxidoreductase NAD-binding domain	3B	8360000		5.92684	3.78247	1.37149e-05	13.8701	4.68024	2.58961e-19	7.6478	4.29894	4.42725e-06	13.483	5.89706	1.01626e-32
TraesCSU01G422800LC	NBS-LRR disease resistance protein-like protein	Un	316685199		5.5322	3.77932	0.000154242	11.3569	4.23697	0.0142926	6.03174	4.34892	0.0025519	12.5244	3.23732	0.0170122
TraesCS6A01G294400	Ubiquitin system component Cue protein	6A	526161156		14.8762	3.76121	0.0443075	23.0645	6.14889	0.00385595				23.1851	6.19284	4.64208e-05
TraesCSU01G007300LC	Disease resistance protein RPP13	Un	2470205		2.2768	3.73676	0.00188684							5.64814	3.85093	0.0198483
TraesCS7B01G342100	F-box domain containing protein-like	7B	597186286		1.48916	3.70014	0.00232862
TraesCSU01G128900LC	Kinase family protein	Un	71212604		9.58812	3.59126	1.18685e-06				7.54825	3.38118	0.0004388	12.3885	3.81072	0.0017503
TraesCS5A01G000300	Armadillo repeat-containing protein 8	5A	28170		1.4385	3.55734	0.00356391
TraesCS6A01G510200LC	Cytochrome P450 family protein	6A	557920362		1.90957	3.501	0.000147459
TraesCS6B01G238600LC	3-oxoacyl-[acyl-carrier-protein] reductase FabG	6B	159427427		2.84195	3.50049	1.55723e-05				2.46964	3.45125	0.00663906	4.64014	2.83771	0.0164304
AML47764	Terpene synthase	3B	8380000		2.03778	3.46694	0.00228243							4.78871	3.0754	0.0341053
TraesCS2B01G129700	NBS-LRR disease resistance protein-like protein	2B	97338532		8.33549	3.40738	1.25248e-14	12.4166	3.14524	1.10657e-05	7.7815	3.00035	1.56741e-05	11.9597	3.51266	3.46578e-06
TraesCS2B01G085700LC	Lupus brain antigen 1-like protein	2B	41156487		1.38961	3.3702	0.0488143
TraesCS7B01G032200	Mitochondrial transcription termination factor-like	7B	32347218		1.70776	3.36878	1.4871e-08
TraesCSU01G650500LC	Protein kinase-like	Un	459435945		10.8061	3.30917	1.62297e-06				9.16118	2.85882	0.0031106	13.2867	3.70186	0.001385
TraesCS3B01G314500LC	Transposon protein, putative, CACTA, En/Spm sub-class, expressed	3B	281520420		4.63611	3.30392	0.0141704	7.27955	5.75315	7.7518e-08				8.13666	3.74174	0.0238226
TraesCS1D01G113800	Gag polyprotein	1D	109979507		2.31286	3.29218	0.00536632
TraesCSU01G021800	Endo-1,4-beta-xylanase	Un	23651711		2.381	3.28277	0.0346956
TraesCS5A01G547400	RING/U-box superfamily protein	5A	701298386		37.7472	3.26768	1.09706e-07	58.8891	3.40828	0.0311813	36.0584	3.20242	7.48535e-06	63.7985	2.83386	0.00252789
TraesCS1D01G028200	Disease resistance protein (TIR-NBS-LRR class) family	1D	11177049		13.324	3.24653	2.71739e-10	34.1776	2.60929	0.0477126	15.2523	4.30893	2.98171e-24	28.7544	4.21361	8.06797e-13
AML47768	Hypothetical Protein, Calcium binding	3B	8460000		17.6348	3.194	1.76818e-06	33.748	4.10035	2.00948e-18	20.5485	3.51424	9.51661e-05	33.9177	4.13723	1.49363e-12
TraesCS2B01G083700	Glycosyltransferase	2B	46677534		24.7844	3.17788	0.0376895
TraesCS3B01G230400	Metal transporter, putative	3B	344949774		13.5858	3.17567	0.0122494
TraesCS3D01G201200	Nucleolar RNA binding protein	3D	238458366		5.72751	3.17006	0.00546234
TraesCS2B01G096100LC	Transposon protein, putative, CACTA, En/Spm sub-class, expressed	2B	46336334		18.8725	3.157	8.12858e-06	38.5385	2.83425	0.0489831	20.0471	3.60553	0.000754773	35.7952	3.44797	1.66729e-05
TraesCS5A01G381700	Phosphatidic acid phosphatase (PAP2) family protein	5A	579411595		1.85348	3.05945	0.000340838	3.89017	4.15486	5.08674e-05	2.32739	3.59518	0.0010228	4.35931	3.03047	0.000787108
TraesCS1A01G038300	Inorganic pyrophosphatase family protein	1A	21024514		5.2632	3.04632	0.00674796				4.47561	5.56796	5.701e-11	9.19308	4.92357	1.1347e-06
TraesCS2A01G134300LC	Methylenetetrahydrofolate--tRNA-(uracil-5-)-methyltransferase TrmFO	2A	79299564		1.58258	3.01876	0.0304009
TraesCS3B01G314400LC	Transposon protein, putative, CACTA, En/Spm sub-class, expressed	3B	281418145		3.985	3.00061	0.00173219	6.44747	5.03495	6.65705e-08	4.77124	2.9314	0.0348463	7.74911	2.94501	0.0121961
TraesCS1D01G042500	Ankyrin repeat protein-like	1D	20968399		7.54231	2.99911	1.69381e-06	17.6197	2.87718	0.0182606	8.66697	3.94306	2.99402e-09	16.9578	3.22884	0.00212816
TraesCS6B01G120500	Cytochrome P450 family protein	6B	115683135		3.51978	2.98656	0.00785191				2.87204	3.67938	0.00306304
TraesCS1B01G417600	Translationally-controlled tumor protein-like protein	1B	642042173		5.14711	2.97745	3.1521e-05
TraesCS3B01G540800	Cellulose synthase-like protein	3B	779528069		4.22211	2.95442	1.20645e-18
TraesCS6D01G397500	calcium-dependent protein kinase 18	6D	469344082		1.78715	2.9544	0.000301492
TraesCS7B01G343300	O-fucosyltransferase family protein	7B	598474027		6.48107	2.92495	8.97198e-06
TraesCS1B01G208100LC	Lipase	1B	148128710		12.7951	2.92172	6.40053e-16	29.5613	2.92453	2.66239e-05	16.0239	3.48193	1.36238e-18	26.5815	3.95785	4.80248e-12
TraesCS1A01G023900	SKP1-like protein 4	1A	11670628		1.45754	2.92003	0.0244562
TraesCS1A01G048200	CsAtPR5	1A	29993437		5.79647	2.87873	6.79298e-08	13.6946	2.6337	0.0396332	7.09568	3.46975	1.32322e-11	11.514	4.27382	7.36219e-12
TraesCS6A01G505900LC	SPOC domain / Transcription elongation factor S-II protein	6A	553858329		4.76598	2.8363	1.03502e-10				4.1542	2.97969	2.01792e-08	6.69966	3.02521	2.9618e-06
TraesCS2B01G862100LC	zinc finger (C2H2 type) family protein	2B	769905554		1.93139	2.82929	9.32372e-06
TraesCS5B01G109000	Early nodulin-like protein 1	5B	152509191		2.63164	2.76944	0.000106338
TraesCS3B01G146000	Ankyrin repeat protein-like	3B	135677683		1.68038	2.74708	1.83542e-06
TraesCS6D01G398500	F-box protein	6D	469615840		4.12473	2.74157	5.599e-10	6.41183	2.227	0.0193047	3.7184	2.72733	0.000143197	6.02848	2.60299	0.00182091
TraesCSU01G011700	Cytochrome P450 family protein, expressed	Un	15759071		40.9751	2.73484	0.00259246
TraesCS2B01G862200LC	zinc finger (C2H2 type) family protein	2B	769911195		2.89882	2.73146	0.000983735
TraesCS4A01G281900LC	Transposon protein, putative, CACTA, En/Spm sub-class	4A	402278609		3.26672	2.71215	0.0467836
TraesCS6B01G242300	Flavonoid 3'-monooxygenase	6B	429259262		17.277	2.67654	6.25408e-24	27.9982	2.43744	4.24049e-06	16.784	2.7437	1.14927e-12	26.971	2.65285	6.6754e-07
TraesCSU01G014000LC	Trigger factor	Un	8119050		2.46754	2.66405	0.0156444
TraesCS7B01G478200LC	mitogen-activated protein kinase kinase kinase 6	7B	506601661		1.8562	2.66349	1.77116e-07
TraesCS2B01G001100	Cytochrome P450 family protein, expressed	2B	477193		4.19295	2.63441	2.79069e-05
TraesCS6B01G378600	RING/U-box superfamily protein	6B	653221445		11.8221	2.60511	5.18675e-25	15.6274	2.31185	0.000174489	10.7257	2.27863	2.4124e-09	15.7694	2.31517	7.78653e-05
TraesCS2B01G620800	Receptor kinase	2B	795051286		3.29793	2.58654	0.00447037
TraesCS7B01G038300	Pheophorbide a oxygenase, chloroplastic	7B	37359519		38.7222	2.56417	1.51181e-05				33.5715	3.17859	2.90192e-07	62.903	2.45289	0.0196087
TraesCS1B01G183200	Myosin	1B	330193820		48.046	2.55988	0.00388819				39.9423	4.08708	1.19788e-06	78.0793	3.41459	0.00945474				11.7266	2.64168	0.0117154
TraesCS6B01G144200LC	F-box family protein	6B	83200263		5.81054	2.53696	0.0041635				5.33169	2.79961	0.00965875
TraesCS7B01G281600	PAB-dependent poly(A)-specific ribonuclease subunit pan3	7B	516255384		3.29305	2.5317	1.71862e-08
TraesCS5A01G119800	3'(2'),5'-bisphosphate nucleotidase 1	5A	253592929		88.9723	2.51861	0.00425492	148.923	4.34465	8.19298e-08				140.83	5.89995	2.47195e-114							51.1668	3.41917	0.00135936
TraesCS3B01G276100LC	GW repeat- and PHD finger-containing protein NERD	3B	223697967		5.69483	2.51233	0.0144001				5.89739	3.39605	0.00291866	11.5623	2.48776	0.0447088
TraesCS2A01G110900	NBS-LRR disease resistance protein-like protein	2A	62355830		8.35454	2.50583	1.15046e-12	10.9478	2.10078	0.0267864	7.42414	2.19444	1.82139e-05	10.8613	2.17373	0.00470869
TraesCS6B01G388400	WEB family protein, chloroplastic	6B	663691005		3.60925	2.5039	1.07081e-17
AML47759	PAP fibrilling domain containing protein	3B	8300000		5.02719	2.44677	8.27186e-08	9.56625	2.7259	2.38022e-07	5.93435	2.77627	3.7831e-08	8.9795	3.09119	2.15984e-08
TraesCS5A01G052800	Gag polyprotein	5A	47772046		20.6049	2.44433	2.18527e-27	32.2526	2.57176	1.99336e-08	21.4811	2.50309	8.81138e-20	32.7616	2.50842	2.68663e-10
TraesCSU01G574800LC	1-aminocyclopropane-1-carboxylate oxidase	Un	395158372		29.5395	2.43551	3.37845e-08	48.7682	2.73988	8.77247e-06	32.1426	2.61675	2.64435e-06	50.4914	2.55965	0.00154271
TraesCS2D01G460300	GPI mannosyltransferase 2	2D	566986849		3.9934	2.42677	9.84673e-05				3.77212	2.13093	0.0355465
TraesCS7D01G006700	Disease resistance protein	7D	3436919		7.95202	2.41955	8.83679e-05	12.736	2.35827	0.020661	7.97407	2.5629	0.00273465	12.6564	2.4132	0.00107196
TraesCS2B01G077400	RING/U-box superfamily protein	2B	42957074		3.20212	2.41334	0.000110664				3.49526	2.58724	0.000909076	4.88126	3.22345	0.000158273
TraesCS2B01G288900	S-locus lectin protein kinase family protein	2B	399398389		49.2921	2.39801	2.80511e-05				55.0729	2.38334	0.00163441	71.4275	3.36927	2.27429e-07
AML47758	Uncharacterized Protein	3B	8280000		11.3859	2.37931	1.09446e-10	20.516	2.69631	8.00813e-08	13.0536	2.72157	1.97911e-12	20.5666	2.73538	6.37897e-10
TraesCS5B01G798200LC	acetyl Co-enzyme a carboxylase biotin carboxylase subunit	5B	708444191		1.42076	2.37891	0.00112473
TraesCS6D01G065100	Linalool synthase, chloroplastic	6D	31751235		2.86433	2.37242	0.000437679
TraesCS3D01G170600LC	pseudo-response regulator 9	3D	116149818		2.92166	2.34875	1.41676e-05
TraesCS6B01G070900	NBS-LRR-like resistance protein	6B	47275369		25.6919	2.33291	9.21366e-17	33.6839	2.65468	2.85428e-06	25.3111	2.18626	9.09904e-09	38.6398	1.98414	0.000391865
TraesCS6A01G103900	Receptor-like protein kinase	6A	73068423		2.97307	2.32908	0.0241313
TraesCS6B01G139500	Terpene cyclase/mutase family member	6B	136521269		73.5609	2.3251	5.70089e-15	90.3801	2.156	0.00127294	66.9663	1.97148	3.46332e-07	96.3397	1.89643	0.0015112
TraesCS7B01G328300	carboxyl-terminal peptidase (DUF239)	7B	582932467		2.23981	2.32028	0.000245739
TraesCS1B01G186500	LanC-like protein	1B	333595519		4.5964	2.30273	0.00287945				4.62645	3.09771	9.25105e-05
TraesCS2B01G114900	Protein kinase	2B	78071256		1.86906	2.30132	0.0290704
TraesCS7B01G366100	zinc induced facilitator-like 1	7B	630091241		53.5135	2.2993	6.15888e-05	76.1025	2.46446	0.0309311	47.9454	2.6099	0.000598842
TraesCS7A01G025900	ATP-dependent RNA helicase	7A	10252031		2.67961	2.2966	0.0157545
TraesCS5A01G514400LC	Protein kinase, putative	5A	567940836		10.3997	2.29497	5.98951e-11	16.9068	2.53579	0.000553138	11.4582	2.42844	9.40538e-09	16.7774	2.61555	4.42676e-05
TraesCS6B01G147400LC	Rubber elongation factor protein, putative	6B	85439531		8.65519	2.29061	2.48058e-05	12.737	2.86227	0.00104649	9.21318	2.38829	0.000792204	14.6093	2.15113	0.0277996
TraesCS2B01G582500	Early nodulin-like protein	2B	770055311		2.9304	2.28816	0.0227788
TraesCS1D01G179700LC	Protein FAR1-RELATED SEQUENCE 5	1D	143336067		2.85837	2.28431	8.19549e-06	4.18182	2.4173	0.00485387	2.42608	2.76999	6.76723e-05
TraesCS1B01G022300	Receptor-like kinase	1B	10067448		7.75357	2.27898	0.000580913				6.85807	2.37236	0.00980885
TraesCS2B01G000700	3'-N-debenzoyl-2'-deoxytaxol N-benzoyltransferase	2B	317840		14.648	2.27512	0.0109246
TraesCS7B01G080300	MADS box transcription factor	7B	90189438		2.21137	2.25695	0.0375502
TraesCS2B01G114800	RINT1-like protein	2B	78062882		6.75135	2.25659	1.13697e-06	7.77558	2.85355	7.35977e-05	7.03195	1.78766	0.0151297	8.8892	2.15512	0.00665462
TraesCS1A01G018400	NBS-LRR disease resistance protein, putative, expressed	1A	9543510		10.523	2.25504	0.0298355				11.9328	2.91731	0.00697176	18.4313	3.29034	0.0408966
TraesCS2B01G573100	calcium-dependent kinase-like protein	2B	762705773		29.3561	2.22797	0.00612671							28.5374	3.09552	0.00231361
TraesCSU01G596100LC	Senescence-associated protein, putative	Un	409984883		17.1165	2.22035	0.000210614				14.6357	2.39884	0.001886
TraesCS2B01G567000	Serine/threonine-protein kinase	2B	758114829		7.66643	2.22008	3.05329e-05
TraesCS5A01G004300	Plasma membrane ATPase	5A	2970569		70.8502	2.21084	0.0302141
TraesCS2B01G054900LC	F-box family protein	2B	25787557		4.05063	2.20156	0.000110664	6.52284	3.16708	0.000621834	4.93168	2.38892	0.00253634	7.21405	2.55294	0.000645226
TraesCS6B01G177100LC	F-box domain containing protein	6B	114880837		5.74628	2.19333	0.00340713				4.48295	2.47078	0.0145822
TraesCS2A01G002700	3'-N-debenzoyl-2'-deoxytaxol N-benzoyltransferase	2A	1685581		16.3797	2.18747	0.0293288				16.5281	2.66147	0.045098
TraesCS7B01G569400LC	Phenylalanine--tRNA ligase beta subunit	7B	595449511		5.69639	2.18612	0.000208881
TraesCS1B01G022400	Receptor-like kinase protein	1B	10072757		4.46182	2.18576	0.000157552
TraesCS1B01G246400	Subtilisin-like protease	1B	436290301		2.81576	2.16343	0.020502
TraesCS6B01G152700	Receptor kinase	6B	156529803		8.57665	2.15392	1.80351e-05	10.4966	2.49431	0.000621842	7.65603	2.1797	0.00121445
TraesCS1D01G103200	Lipase	1D	92959196		694.96	2.14621	0.0163564				579.298	3.2911	0.00148774
TraesCS4B01G394400	tRNA uridine 5-carboxymethylaminomethyl modification enzyme MnmG	4B	668445453		1.94022	2.14064	0.0428343
TraesCS6B01G652600LC	Cytochrome P450 97B2, chloroplastic	6B	630608962		25.3296	2.14058	0.000129598				23.7688	2.05334	0.00472218	32.9721	2.20311	0.00719096
TraesCS6B01G140300	Branched-chain-amino-acid aminotransferase	6B	139416457		2.81756	2.1324	0.00230047
TraesCS1D01G337700LC	GMP synthase [glutamine-hydrolyzing]	1D	323937346		3.60296	2.12934	0.0371534
TraesCSU01G038000	RNA-binding region RNP-1	Un	31599109		3.36893	2.12443	0.000821062
TraesCS4B01G083200	Eukaryotic translation initiation factor 3 subunit B	4B	82018340		115.131	2.11198	7.1971e-30	174.306	2.2986	3.03352e-09	121.328	2.21604	1.67702e-19	177.613	2.2287	4.14769e-09
TraesCS1B01G438900	F-box family protein	1B	660894903		6.82923	2.11084	6.05995e-05				6.85285	1.84374	0.0447787	8.99123	2.07177	0.0463344
TraesCS1B01G580900LC	Retrotransposon protein, putative, Ty1-copia subclass	1B	563958798		7.15907	2.11024	0.0156161				7.66799	2.29195	0.0427794	10.911	2.48121	0.0319671
TraesCS6B01G552100LC	RNA-binding protein Nova	6B	529894969		3.98001	2.10985	0.000494944	5.68894	2.57431	0.0165548	3.84201	2.4639	0.000711285
TraesCS1D01G130200	Peroxidase	1D	143361846		9.07341	2.09815	3.8582e-12	14.2413	1.85337	0.0179901	8.63716	2.2777	1.59393e-08	13.4465	2.05007	0.000120951
TraesCS3B01G345500	Retrovirus-related Pol polyprotein from transposon TNT 1-94	3B	555157465		15.9899	2.09651	0.0018578	23.2587	2.553	0.0158983	15.7146	2.43353	0.00445538
TraesCS1B01G113500	Glutathione S-transferase	1B	132938168		2.7265	2.09167	2.73436e-06
TraesCS4B01G611300LC	Ketol-acid reductoisomerase (NADP(+))	4B	669309680		3.66047	2.07278	0.000418632				4.08068	2.55808	0.00109049	6.53957	2.36872	0.0036
TraesCS4A01G389900	Gamma-aminobutyric acid receptor subunit gamma-2	4A	667174382		20.6606	2.07238	0.000608653				22.8184	2.03981	0.0403523	26.7431	3.19485	5.91644e-07
TraesCS2B01G019000LC	Retrovirus-related Pol polyprotein from transposon TNT 1-94	2B	9860930		3.4264	2.07072	0.015469
TraesCS6D01G181100	Cyclic nucleotide-gated ion channel, putative	6D	202964553		32.8265	2.07057	0.0384217
TraesCS2B01G085100	Phosphoglycerate mutase family protein	2B	47519245		5.74955	2.0549	8.27186e-08				5.21865	1.8488	0.000917196
TraesCS7B01G381000LC	Transposable element protein, putative, Retrotrans_gag	7B	383861832		2.89814	2.04749	3.34089e-05
TraesCS7B01G063100	Inositol-tetrakisphosphate 1-kinase	7B	67818473		2.38019	2.04357	6.21878e-07
TraesCS5D01G178800	transcription factor-like protein	5D	278260566		10.0918	2.03901	6.85348e-06	15.3944	2.58304	9.73566e-06	11.0373	2.26097	0.000609244	16.8727	2.10095	0.000277711
TraesCS1A01G386100LC	P-loop containing nucleoside triphosphate hydrolases superfamily protein	1A	435405516		3.40934	2.03573	0.00345934							3.8877	3.17642	2.84195e-05
TraesCS2B01G226100LC	SKP1-like 7	2B	137347157		5.92732	2.01181	0.0247012							7.55803	2.76387	0.0127417
TraesCS2B01G440600	Leucine-rich repeat protein kinase family protein	2B	632518821		11.2744	2.00546	1.25269e-09	14.1317	1.96894	0.00223953	11.0054	1.74942	0.000205763	14.6597	1.86161	0.00204926
TraesCS2A01G022300	Myrcene synthase, chloroplastic	2A	10734404		2.28704	2.00142	0.0389147
TraesCSU01G084300	CLIP-associating protein 1	Un	75460411		31.1516	1.99315	0.0169881
TraesCS5B01G268400LC	DUF639 family protein	5B	287621387		9.79712	1.99047	0.000120974				9.65204	2.49123	1.25009e-05	15.0284	2.40431	0.00492291
TraesCS2B01G615500	Protein NRT1/ PTR FAMILY 5.5	2B	793413273		20.1702	1.99019	9.43066e-07	30.7607	2.66035	6.52406e-05	23.929	2.09367	0.00047852	31.805	2.49984	4.4899e-05
TraesCS6D01G174400	Poly(A) polymerase	6D	163830612		51.3898	1.96966	0.000466446
TraesCS2B01G500700	Non-specific lipid-transfer protein	2B	695927770		4.99066	1.94999	0.00630754
TraesCS3A01G095200LC	Cytochrome P450 family protein, expressed	3A	48663833		26.7597	1.94961	0.000144357				25.7805	2.20175	0.00127525	35.6065	2.51338	0.00460905
TraesCS6B01G386500	Serine incorporator	6B	661340336		164.953	1.93964	8.438e-35	219.965	1.62974	4.86578e-05	155.223	1.7724	4.68972e-13	209.351	1.83572	1.54685e-07
TraesCS2B01G615600	Peroxidase	2B	793446051		11.7405	1.9229	6.76027e-06	15.35	2.29959	0.00699391	12.9311	1.72459	0.00753963	15.5557	2.25908	0.000111573
TraesCS6B01G047100	2-oxoglutarate (2OG) and Fe(II)-dependent oxygenase superfamily protein	6B	27919372		5.89948	1.92136	0.0138425
TraesCS2B01G683100LC	Protein FAR1-RELATED SEQUENCE 5	2B	642830727		3.63868	1.91983	4.08462e-05				3.67884	1.82308	0.00949541
TraesCS6D01G218700	Calcium-dependent lipid-binding domain-containing protein	6D	308884062		2.29421	1.9178	0.0456097
TraesCS7D01G140200	ENTH/ANTH/VHS superfamily protein	7D	89598935		490.298	1.91099	1.35889e-53	743.028	1.98384	1.25948e-14	511.199	2.06294	9.42264e-38	726.196	2.10666	2.02399e-17
TraesCS2B01G913700LC	Peroxidase	2B	793445994		11.6004	1.90956	4.93551e-05	15.1025	2.61367	0.00497616	13.2832	1.75965	0.0140956	16.2411	2.24716	0.000551476
TraesCS3B01G238400	Mitochondrial carrier protein-like	3B	373622848		17.9929	1.9091	0.0408743	22.6828	5.25105	2.3862e-18
TraesCS3B01G220100	Oligoribonuclease	3B	267430504		3.31384	1.90768	0.00176124
TraesCS5B01G337200	Plant thionin family protein	5B	520552152		8.83584	1.90714	0.0499384
TraesCS6B01G178200LC	F-box domain containing protein	6B	115059899		18.2542	1.89258	0.0250477													14.6241	-2.96578	0.000148031
TraesCS2B01G624200	Glutamyl-tRNA(Gln) amidotransferase subunit A	2B	797464154		7.55848	1.88587	0.0157695
TraesCS7B01G432700LC	PHD finger protein 6	7B	456121973		7.22442	1.87647	0.00117545
TraesCS3A01G077300	Cytochrome P450 family protein, expressed	3A	48663109		26.7107	1.86695	0.000220247				25.4044	2.11494	0.00229005	33.9714	2.51737	0.00351324
TraesCS4A01G308700	2-oxoglutarate (2OG) and Fe(II)-dependent oxygenase superfamily protein	4A	602259911		25.6341	1.86501	8.27186e-08
TraesCS5B01G423700	Stress up-regulated Nod 19 protein	5B	600054196		11.9483	1.86301	0.0029169							11.8291	2.00491	0.00665152
TraesCS7A01G462400	SAC3/GANP/Nin1/mts3/eIF-3 p25 family	7A	658929745		47.6397	1.85502	0.0108802				37.7137	2.43899	0.0143073
TraesCS5A01G708900LC	F-box/RNI-like superfamily protein	5A	690955134		16.0284	1.85381	4.33838e-20	23.0865	1.60776	0.00104649	15.9232	1.81153	2.91371e-09	20.5445	2.08947	1.99311e-07
TraesCS7B01G662000LC	Erythroblast NAD(P)(+)--arginine ADP-ribosyltransferase	7B	661913450		8.10777	1.85187	8.7882e-10	10.6757	2.02613	0.00125457	8.4345	1.74793	0.000192182	10.9728	1.94682	0.000285732
TraesCS4B01G005900	Cytochrome P450 family protein, expressed	4B	3859572		91.8879	1.84603	0.0123923				93.4162	2.16847	0.0298913
TraesCS2B01G297000LC	Retrotransposon protein, putative, unclassified	2B	202496494		3.88868	1.84548	0.000460489
TraesCS1A01G028600	Disease resistance protein (NBS-LRR class) family	1A	13414048		38.125	1.84367	0.000948552				36.2452	2.71323	8.73174e-06
TraesCS5A01G120000	Pyruvate dehydrogenase E1 component alpha subunit	5A	253604999		47.239	1.84204	0.00241209	77.124	2.42834	0.00167358	62.1361	1.89524	0.0340184	65.1764	3.70068	3.67209e-57							34.3023	1.81343	0.0232207
TraesCS1D01G012600	Defensin	1D	6547769		7.37052	1.82959	2.05403e-07	12.2457	2.37783	9.73566e-06	8.25728	2.36647	3.34955e-09	13.3706	2.00662	4.82795e-08
TraesCS6A01G316200	Heat-shock protein, putative	6A	552757780		23.249	1.82045	2.00742e-06				20.2136	2.24614	6.02303e-08	33.6011	1.73277	0.00131843
TraesCS3B01G783500LC	B3 domain-containing protein	3B	771513155		3.64174	1.81899	8.97554e-05	5.02658	2.01447	0.0374556
TraesCS5B01G014100	WAT1-related protein	5B	13496733		7.61122	1.81812	2.60865e-07	13.1949	2.02183	0.00715516	8.56632	2.22849	1.39308e-06	12.1644	2.41362	3.91545e-05
TraesCS2B01G018000	DnaJ heat shock amino-terminal domain protein	2B	8276721		3.27788	1.80293	0.0495262
TraesCSU01G167700	Chlorophyll a-b binding protein, chloroplastic	Un	246248430		2.07001	1.79866	0.00161466
TraesCS1A01G028900	NBS-LRR-like resistance protein	1A	13569533		64.2061	1.79599	0.00967918				67.3498	1.99907	0.0374132	90.5296	2.24836	0.0495707
TraesCS3D01G488300	WAT1-related protein	3D	583034943		3.02556	1.79269	0.0414189
TraesCS7B01G056800LC	RAB GTPase homolog C2B	7B	34204492		12.9091	1.78989	0.0313966
TraesCS7B01G037400	Cytochrome P450	7B	36472381		4.14426	1.78815	0.000942352				3.36929	2.2654	0.00197228
TraesCS2D01G074800	IAA-amino acid hydrolase ILR1	2D	32028133		2.81543	1.78641	0.000332342
TraesCS3A01G540800LC	pre-mRNA-splicing factor of RES complex protein	3A	646001726		2.69753	1.78135	0.000660992
TraesCS3B01G312800LC	Retrotransposon protein, putative, Ty1-copia subclass	3B	279662297		11.8327	1.78079	0.0459147	15.2357	3.65396	5.03032e-07
TraesCS1B01G581000LC	Retrovirus-related Pol polyprotein from transposon TNT 1-94	1B	563961134		3.90292	1.76706	0.0220917
TraesCS6B01G191600	Regulator of chromosome condensation (RCC1) family protein	6B	225868997		6.72879	1.75478	1.4468e-06	8.13805	2.57297	2.03349e-05	7.16441	1.75834	0.000461687	10.3891	1.54167	0.0239565
TraesCS2B01G031100	Myrcene synthase, chloroplastic	2B	14404447		3.74977	1.75442	0.0063666
TraesCS2B01G238200	Syntaxin	2B	239506937		50.107	1.75236	6.94258e-08				49.7559	1.75167	2.78487e-05	60.6116	2.25642	1.05287e-10
TraesCS6B01G120600	beta glucosidase 43	6B	115698525		2.92561	1.74637	0.0244486
TraesCS7B01G394400	Histone H2B	7B	661913109		14.1175	1.74123	1.26499e-13	18.7672	1.74428	0.00286648	14.0777	1.71407	1.26991e-06	19.0938	1.71656	0.00015763
TraesCS1A01G237900	Subtilisin-like protease	1A	423907206		8.71007	1.73975	0.000880901
TraesCS6A01G103800	F-box domain containing protein	6A	73063580		10.0439	1.7341	0.000419415				9.95591	1.52404	0.0317439	10.4701	2.52883	0.000587396
TraesCS2A01G002900	Cytochrome P450 family protein, expressed	2A	1783498		36.9862	1.72771	0.0250799
TraesCS7A01G074500	ABC transporter family protein	7A	40184773		14.2297	1.72537	0.018311
TraesCS6B01G031200LC	Transducin/WD40 repeat-like superfamily protein	6B	15268119		1.97126	1.72074	0.023821
TraesCS6B01G652400LC	GPI-anchored adhesin-like protein	6B	630596886		6.2645	1.71549	0.00195804
TraesCS7B01G569000LC	SBP (S-ribonuclease-binding protein) family protein, putative	7B	595166549		7.3524	1.71165	0.000746245
TraesCS7A01G484500	Tesmin/TSO1-like CXC domain-containing protein	7A	675495210		5.61899	1.70484	2.97541e-09	7.43286	2.08409	2.60696e-07	5.93427	1.75045	9.47818e-06	8.12414	1.73555	0.00160557
TraesCS7A01G371800	tRNA-2-methylthio-N(6)-dimethylallyladenosine synthase	7A	545543404		4.52842	1.69821	0.000185292				3.328	1.92522	0.000846337
TraesCS7B01G352300	Xyloglucan 6-xylosyltransferase 1	7B	608874975		5.82523	1.69496	4.3946e-06							8.84122	2.40479	0.000566486
TraesCS1A01G113400	Tryptophan aminotransferase	1A	116694051		2.25975	1.69222	0.01536
TraesCS5A01G015800	WAT1-related protein	5A	11133327		29.177	1.67589	2.70292e-11	50.8035	1.66893	0.000127834	31.4851	2.13014	5.5293e-10	43.9986	2.30211	1.56925e-08
TraesCS2B01G007500	NBS-LRR disease resistance protein, putative	2B	4642753		2.32449	1.66928	0.0488143
TraesCS6B01G010000	DAG, chloroplastic	6B	6166196		14.2907	1.66866	0.0106666	14.828	2.30545	0.0340631
TraesCS1A01G029100	Disease resistance protein (TIR-NBS-LRR class) family	1A	13663299		27.0238	1.65944	0.00508463	49.0507	1.55954	0.0461879	27.8027	2.29487	0.000672315	42.9172	2.11213	0.00427985
TraesCS7D01G069500	ABC transporter family protein	7D	40272628		6.38127	1.65737	0.0341624
TraesCS1B01G476000	SPOC domain / Transcription elongation factor S-II protein	1B	684213628		8.17242	1.65243	0.00376387				8.09711	2.26636	0.000565615	13.0154	1.84651	0.0226141
TraesCS3B01G004200	Subtilisin-like protease	3B	2484566		5.23406	1.64424	0.000167043	7.50454	1.71061	0.0345668	5.01506	1.95524	0.00195728	8.07834	1.43504	0.0295239
TraesCS3B01G536000	F-box family protein	3B	776028755		9.90529	1.63688	0.00138986				8.13074	2.23799	8.70943e-06
AML47754	Glycosyltransferase HGA-like	3B	8200000		11.0606	1.63137	6.77925e-09	17.6717	2.0145	6.65705e-08	12.4672	2.02064	5.36345e-12	17.5375	2.06801	2.35745e-09
TraesCS2A01G591600	Isopropylmalate dehydrogenase	2A	779216018		6.07172	1.61568	0.0230649
TraesCS2B01G097400LC	NADPH:quinone oxidoreductase	2B	46603572		5.37407	1.61488	0.0011229				5.36071	1.92296	0.00550374	7.34509	1.98896	0.00171856
TraesCS5A01G299400LC	QUASIMODO2 LIKE 1	5A	382783689		4.04116	1.60491	0.0200738	4.92476	2.8223	0.0365998				5.47285	2.19398	0.00264019
TraesCS2B01G078900	Ribulose bisphosphate carboxylase small chain	2B	44190499		59.9291	1.59657	0.00309428							62.9588	2.80388	1.2336e-08							45.2894	1.47769	0.0249966
TraesCS2B01G325900LC	staurosporin and temperature sensitive 3-like A	2B	238498457		8.73086	1.59374	0.0171399
TraesCS5B01G568800LC	Histone-lysine N-methyltransferase ASHR1 isoform 1	5B	556790714		5.68759	1.59204	0.00210185				4.96172	1.61613	0.014405
TraesCS6A01G081800	Cytochrome P450	6A	50407879		53.375	1.59163	0.0020975				44.3751	1.7775	0.00317451
TraesCS6B01G188500	26S protease regulatory subunit	6B	217155346		33.8516	1.58499	6.9589e-23	43.7161	1.53279	4.12799e-05	32.5366	1.58409	8.34503e-11	45.4498	1.41235	0.00015666
TraesCS5A01G709000LC	FBD-associated F-box protein	5A	690956601		4.00688	1.56017	1.08762e-06	5.03888	1.91127	0.0147275	4.27365	1.46693	0.00166892	5.24587	1.69564	0.00667212
TraesCS1B01G399600	tRNA-2-methylthio-N(6)-dimethylallyladenosine synthase	1B	630699908		3.97816	1.55705	0.000573497	5.51755	1.87984	0.0294004	4.4145	1.64323	0.00634799
TraesCS7D01G004000	Terpene cyclase/mutase family member	7D	2235619		4.55076	1.55701	0.0311985
TraesCS1D01G277900LC	Retrotransposon protein, putative, unclassified	1D	253184185		3.73004	1.54731	0.03868
TraesCS2B01G084200	Glycerol-3-phosphate dehydrogenase	2B	47167044		54.6181	1.54635	0.00679824				50.3189	1.81688	0.0244999
TraesCS6B01G381500	Deoxyuridine 5'-triphosphate nucleotidohydrolase	6B	656484185		12.5506	1.53756	6.23031e-09				11.0888	1.41757	0.000572939	15.1088	1.24691	0.0118396
TraesCS4B01G099400LC	Retrovirus-related Pol polyprotein from transposon TNT 1-94	4B	77078217		2.62072	1.53387	0.0136113
TraesCS6D01G397800	Gibberellin-regulated family protein	6D	469391148		13.9209	1.51143	6.45182e-06				14.0207	1.36637	0.000844834	14.9727	2.07132	5.60796e-06
TraesCS3B01G001400LC	ER lumen protein retaining receptor family protein	3B	984790		39.5049	1.50633	6.67464e-05	57.5019	1.64512	0.00429846	40.1823	1.80304	7.4353e-05	53.8301	1.91568	7.21501e-05
TraesCS7B01G038800	Retrotransposon protein, putative, unclassified	7B	37844712		5.23507	1.50159	5.67819e-05				4.35149	1.63402	0.000556411
TraesCS3B01G151600	Subtilisin-like protease	3B	143167855		17.5088	1.50069	8.17755e-18	26.9116	1.79433	7.89785e-09	19.0042	1.88334	4.41214e-23	26.6278	1.85225	1.14864e-11
TraesCS4D01G005600	2-oxoglutarate (2OG) and Fe(II)-dependent oxygenase superfamily protein	4D	3256287		92.011	1.49957	2.77744e-05				71.5294	1.38272	0.000551465
TraesCS6B01G374300	Genome polyprotein 1	6B	647502494		4.06536	1.49402	0.0496901
TraesCS3B01G552800	Non specific phospholipase C	3B	787478590		12.533	1.48731	0.0318687				12.2418	1.89332	0.048253
TraesCS2B01G501400	Linalool synthase, chloroplastic	2B	696668268		122.518	1.48513	0.00404799				110.514	1.88587	0.0048449	168.525	1.54701	0.0320086
TraesCS6B01G369700	DNA (Cytosine-5-)-methyltransferase	6B	643259757		19.922	1.48081	3.14276e-05	24.5554	1.51512	0.0425453	19.0487	1.48082	0.00434778
TraesCS2B01G089000	Ubiquitin thioesterase	2B	50286964		14.5182	1.47991	2.5372e-06				14.3712	1.24339	0.0102818	16.1656	1.63387	0.0023531
TraesCS3B01G195400	Polynucleotidyl transferase ribonuclease H-like superfamily protein	3B	221979961		4.22006	1.47892	5.87709e-05				4.18529	1.91885	9.84684e-07	6.36079	1.59397	0.00263833
TraesCS5A01G027200	EEIG1/EHBP1 N-terminal domain-containing protein	5A	22715165		54.3158	1.47841	4.48558e-15	77.1569	1.68306	1.66788e-08	55.2131	1.77187	6.62285e-23	81.3315	1.51007	0.000958149
TraesCS6D01G397600	F-box family protein	6D	469371104		7.47637	1.47586	4.34608e-10				7.31251	1.39311	3.12205e-06	9.08204	1.52067	0.000561853
TraesCS3A01G213300	Translation initiation factor IF-2	3A	384731255		12.0009	1.4739	0.00636076
TraesCS7D01G146600LC	50S ribosomal protein L14	7D	73116561		10.3441	1.47385	2.94166e-08	16.3921	1.76188	0.00222679	11.5979	1.84111	9.65456e-08	15.1629	2.07262	4.77065e-05
TraesCS2B01G512900	Serine/threonine-protein kinase	2B	708198257		3.02683	1.4736	0.0273887
TraesCS6D01G053200	F-box protein	6D	25639756		3.53029	1.47095	0.00116233
TraesCS1A01G102700	Glutathione S-transferase	1A	99018551		10.0715	1.4704	3.23133e-05				10.7028	1.80435	0.000107495	13.9661	2.02868	3.631e-05
TraesCS6A01G380800	Cinnamoyl CoA reductase	6A	600950329		6.36026	1.46383	0.000352404				5.61332	1.33317	0.0307034
TraesCS6A01G411900	Protein kinase family protein	6A	613969468		17.1281	1.4636	0.0371249	20.7442	2.42038	0.00925741
TraesCS5A01G709100LC	Diacylglycerol kinase gamma	5A	690956716		3.65451	1.45653	9.72654e-07	4.39174	1.80444	0.0222288
TraesCS2D01G140700	ARM repeat superfamily protein	2D	82891141		3.30335	1.45552	0.0463978
TraesCS5A01G358600	Cleavage and polyadenylation specificity factor subunit 3	5A	561108627		17.9072	1.45417	1.76022e-09	26.5011	1.35836	0.0444472	17.753	1.71241	5.85427e-09	24.6613	1.64227	8.56714e-05
TraesCS6B01G116900	Upstream activation factor subunit spp27	6B	106467327		9.812	1.45231	3.72764e-06	11.4947	1.59349	0.0125104	9.76996	1.31789	0.00311575
TraesCS4B01G009100	Helicase-like protein	4B	5932191		10.0443	1.43738	0.00791368				9.84006	1.58931	0.0358957
TraesCS2B01G025700LC	Alanyl-tRNA synthetase	2B	12014536		5.09261	1.43528	0.00509142
TraesCS7A01G300700LC	Transposase	7A	206573762		6.49133	1.43125	0.0249635				5.75234	1.67082	0.034774
TraesCS5B01G294700	Beta-glucosidase	5B	478916663		17.1106	1.41925	0.0176052
TraesCS1B01G293300	Myb-like protein	1B	510979759		32.447	1.41209	1.81806e-06	32.9126	1.19367	0.0226369
TraesCS6D01G401900	ATP-dependent RNA helicase	6D	470680307		113.666	1.41164	1.01652e-14	148.804	1.07487	0.00822617	100.122	1.48079	1.24744e-13	149.634	1.06109	0.00058388
TraesCS7B01G048800	Calcineurin-like metallo-phosphoesterase superfamily protein	7B	48761914		15.9641	1.4042	0.000104732				14.0342	1.33994	0.0145822
TraesCS3B01G364100LC	Pentatricopeptide repeat-containing protein	3B	357691850		4.28427	1.39617	0.0139877	5.52052	2.18906	0.00240105	4.68307	1.66382	0.0408602
TraesCS3D01G021600	Terpene synthase, putative, expressed	3D	7102511		6.04006	1.39461	0.0113434				5.65031	1.84627	0.00886376
TraesCS6B01G121200	sulfatase and phosphatidylinositolglycan class N domain-containing protein	6B	116120149		14.5603	1.39374	0.00436203				12.0517	1.64428	0.0058806
TraesCS2A01G279600	GDSL esterase/lipase	2A	465552008		8.05512	1.39322	0.0315333
TraesCS4B01G078600	Fumarylacetoacetate hydrolase, putative	4B	75736640		5.29936	1.39028	4.63084e-08	7.03673	1.47723	0.0125054	5.05922	1.62808	1.81168e-05	7.79189	1.17844	0.0027059
TraesCS1A01G028500	NBS-LRR-like resistance protein	1A	13347389		23.0814	1.38714	0.0434979				23.268	1.8302	0.0215805	29.9894	2.12701	0.0482933
TraesCS5A01G712300LC	Cortical cell-delineating protein	5A	692198015		3.69469	1.38368	0.0487146
TraesCS7D01G520500	Polyadenylate-binding protein	7D	618085183		2.55619	1.37992	0.0253395
TraesCS4A01G325200	F-box family protein	4A	612531496		38.2476	1.37673	0.00731987
TraesCS6B01G581400LC	Ubiquitin family protein	6B	560621358		9.63544	1.3727	0.00614617	12.2249	1.79115	0.0280791	9.45369	1.65507	0.0146253
TraesCS2D01G457100	F-box domain containing protein, expressed	2D	564685159		5.32397	1.37162	2.55644e-06	7.10706	1.67683	0.0008122	5.64553	1.54226	0.000371832	7.54065	1.53677	0.00148934
TraesCS6B01G258200	Flavonoid 3',5'-hydroxylase	6B	463402282		4.54153	1.36979	0.00422553
TraesCS6B01G103600	F-box family protein	6B	82004507		15.9429	1.36547	5.69469e-09	17.9134	1.70386	0.00248711	16.3118	1.24756	6.82104e-05	20.9071	1.20269	0.000300699
TraesCS4B01G611200LC	Transmembrane receptor	4B	669305707		7.16456	1.36482	0.018434				7.8587	1.80127	0.0176852	10.8422	1.8089	0.00517294
TraesCS1B01G449100	Transcription factor radialis-like protein	1B	667930684		10.0117	1.3633	1.8589e-07	13.5293	1.39068	0.0198259	9.81564	1.54087	1.2233e-05	13.745	1.32632	0.0244484
TraesCS2B01G802100LC	Isoaspartyl peptidase/L-asparaginase	2B	734048609		105.15	1.35705	0.00705076
TraesCS2D01G273900LC	kinesin like protein for actin based chloroplast movement 2	2D	233435524		3.64191	1.35122	0.00640393
TraesCS6B01G373800	Chaperone protein dnaJ	6B	646707089		63.5894	1.34789	1.01682e-07				57.7355	1.28835	8.83727e-05	70.7395	1.41002	0.00243459
TraesCS7B01G353100	Peroxidase	7B	610478458		16.2472	1.34435	1.33132e-07	26.4098	1.24024	0.0267528	16.3016	1.82803	7.86466e-11	22.9632	1.73305	0.000315637
TraesCS6A01G454300LC	histone-lysine N-methyltransferase SUVR5	6A	501169149		63.1938	1.33813	0.00509293				60.2326	1.37681	0.0218871
TraesCS2B01G164900	F-box protein	2B	136950254		4.65406	1.33777	0.019541							5.11271	1.84114	0.0410119
TraesCS5A01G172300LC	translocon at the outer envelope membrane of chloroplasts 159	5A	180340245		6.45778	1.33265	0.00142971	9.52055	1.57924	0.015146	7.65046	1.43218	0.0167219	7.69912	2.51993	7.60753e-11
TraesCS2A01G131900	Phosphoribulokinase	2A	79206555		28.656	1.33194	1.4256e-07				27.0099	1.72201	1.11797e-15	39.814	1.43212	0.00103857
TraesCS5B01G178900	NBS-LRR disease resistance protein	5B	326886927		3.26789	1.33121	0.000282538
TraesCS2B01G106400	Short-chain dehydrogenase/reductase family protein	2B	67464523		8.06339	1.32995	1.96417e-07	12.4358	1.20305	0.0225153	7.96432	1.66728	1.17814e-06	10.915	1.60922	7.64265e-06
TraesCS3A01G405200	Heat shock transcription factor	3A	649818933		7.25032	1.32983	5.67606e-06	10.6782	1.50688	0.0162351	7.3702	1.77027	1.41109e-05	11.0218	1.44889	0.00216211
TraesCS1A01G119100	3'-N-debenzoyl-2'-deoxytaxol N-benzoyltransferase	1A	129003619		16.7111	1.32841	1.542e-07	26.189	1.5942	0.00158105	17.6119	1.87319	2.20334e-11	26.2215	1.62434	1.5632e-05
TraesCS3B01G000700	1-deoxy-D-xylulose 5-phosphate reductoisomerase	3B	981834		119.32	1.32404	2.9421e-05	157.204	1.5197	0.00186412	119.681	1.52148	8.64181e-05	169.198	1.28722	0.0189587
TraesCS2B01G538800	Isoaspartyl peptidase/L-asparaginase	2B	734050488		96.181	1.32052	0.00378911							114.863	1.21596	0.0482103
TraesCS2A01G147000	AP2/B3-like transcriptional factor family protein	2A	93401997		38.6092	1.31603	0.000149083				34.1742	1.64897	3.32816e-06
TraesCS6B01G112000LC	Phosphatase 2C family protein	6B	59414004		8.53317	1.31329	6.96851e-09	11.3684	1.13936	0.0310412	8.14236	1.3963	9.1048e-05	10.8908	1.29421	0.00458956
TraesCS1B01G552100LC	lectin protein kinase family protein	1B	544608077		5.86532	1.31178	0.00807857							8.14409	1.6285	0.0465151
TraesCS3B01G302100	U3 small nucleolar ribonucleoprotein protein imp4, putative	3B	485689558		445.693	1.29966	0.045654				449.014	1.73275	0.0350931	509.367	2.58418	3.66644e-05
TraesCS2A01G071900	Receptor-like protein kinase	2A	31970512		6.42647	1.29934	0.0334992
TraesCS6B01G156700	F-box domain containing protein, expressed	6B	159368060		24.8432	1.29374	8.04221e-11	31.5078	1.01402	0.0109718	24.0502	1.17299	3.26022e-05	28.315	1.35902	0.000783389
TraesCS2D01G018800	calcium-dependent lipid-binding family protein	2D	8888643		207.128	1.28892	0.000103832	301.037	1.62597	0.0167238	221.36	1.67296	3.60857e-05	306.882	1.57543	0.00721955
TraesCS6B01G145100	Kinetochore protein nuf2, putative	6B	144961508		25.4891	1.2853	5.2754e-12	31.5269	1.12759	0.0127491	24.0109	1.2659	1.72602e-06	32.0425	1.09727	0.00879648
TraesCS7D01G118200	Histone H3	7D	73116720		11.0104	1.28443	1.49052e-07	15.6855	1.63113	0.00447322	11.821	1.6125	1.1945e-06	15.8818	1.5786	0.000897991
TraesCS6B01G581500LC	methyl-CPG-binding domain 11	6B	560625084		6.4329	1.28058	0.0269947				6.32649	1.55684	0.0378202
TraesCS6A01G119700	Polyubiquitin	6A	91422758		221.879	1.27337	0.00377442							236.93	1.4996	0.0258186
TraesCS1D01G290800	F-box protein	1D	388990989		5.76987	1.26188	0.0120909
TraesCS4B01G248600LC	Orotidine 5'-phosphate decarboxylase	4B	274680124		3.51891	1.26085	0.0472403
TraesCS3B01G174100	RNA-binding protein 47A	3B	175090366		116.322	1.2574	0.00728653	144.676	2.62166	2.151e-11	149.458	1.39459	0.0366579	164.878	1.99121	0.000587396	98.9997	-1.22839	0.0476481
TraesCS6B01G355700	1-aminocyclopropane-1-carboxylate oxidase	6B	624017272		11.4677	1.25612	3.17491e-06				10.9127	1.1734	0.00191788
TraesCS6B01G458500LC	Histone deacetylase, putative	6B	422964799		18.5001	1.25506	6.36064e-09				17.9572	1.06064	0.00261144	20.448	1.28021	0.00294768
TraesCS2B01G083900	CW7 protein, putative	2B	46882383		27.6109	1.25362	2.01705e-05	34.1206	1.30206	0.0332784	25.4342	1.42814	0.000118358
TraesCS2B01G464000	Receptor-like protein kinase	2B	657842353		4.74262	1.25232	0.0157134
TraesCS2B01G583300	Vacuolar protein sorting-associated protein 41-like protein	2B	770679794		134.329	1.2491	1.1503e-06				122.778	1.07075	0.00438972
TraesCS3A01G615900LC	Respiratory burst oxidase-like protein	3A	697747755		7.82579	1.24799	3.03611e-05	11.7705	1.32833	0.0432932	8.57144	1.52621	0.000246038	9.99691	1.95069	5.60796e-06
TraesCS4B01G024700	tetratricopeptide repeat (TPR)-containing protein	4B	17491424		5.20605	1.24756	3.95893e-05				5.20105	1.16115	0.00605672	6.18268	1.32644	0.015623
TraesCS5D01G409100LC	Plasma membrane ATPase 1	5D	419385590		10.4921	1.24599	3.38055e-14	12.6163	1.00562	0.00925741	9.83643	1.12448	3.73788e-07	12.4851	1.06789	0.000785389
TraesCS2B01G083800	Lactoylglutathione lyase	2B	46876920		55.8881	1.24518	6.24357e-07	70.9704	1.35418	0.0113426	54.2732	1.40361	1.20016e-06	77.4812	1.09492	0.0392007
TraesCS3B01G384900	ATP-dependent Clp protease adapter protein ClpS	3B	605019272		4.28174	1.24079	0.00634276				3.87387	1.69284	0.0057986
TraesCS7B01G424300	F-box family protein	7B	693254623		5.75174	1.24073	0.000567158				5.60922	1.38874	0.00754109
TraesCS3D01G234700	Transcriptional corepressor LEUNIG	3D	324304836		311.776	1.24023	9.50738e-13				282.566	1.14467	9.90656e-12	351.774	1.14301	3.9746e-05
TraesCS3D01G286400	Acyl-[acyl-carrier-protein]--UDP-N-acetylglucosamine O-acyltransferase, putative	3D	395078612		72.9154	1.23901	1.08566e-20	82.7119	1.16509	0.000144643	69.2078	1.09102	3.27459e-09
TraesCS2B01G162100	Myb/SANT-like DNA-binding domain protein	2B	135004470		8.73758	1.23756	0.0256517
TraesCS6B01G214500	Tetraspanin family protein	6B	289821195		6.8106	1.23396	0.00669878				6.68541	1.3223	0.0499037
TraesCS5A01G550200LC	Gag-pol polyprotein	5A	593167577		4.81337	1.23384	0.0061801	6.29324	1.7758	0.000345535				6.36271	1.72563	1.87275e-05
TraesCS7D01G048000	Eukaryotic aspartyl protease family protein, putative	7D	24825496		4.28017	1.22808	0.000563914
TraesCS2B01G403900	Anhydro-N-acetylmuramic acid kinase	2B	572163366		3.68049	1.22138	0.000790555
TraesCS1B01G251500	Cation/H(+) antiporter	1B	444057313		4.41872	1.22022	0.0199928
TraesCS6D01G089100	Nucellin-like aspartic protease	6D	54077529		71.3546	1.21815	5.33229e-24	89.7392	1.24683	6.24156e-07	71.9251	1.22997	1.5406e-12	88.5982	1.29632	9.81456e-07
TraesCS5A01G503800	Late embryogenesis abundant protein	5A	669582357		14.1465	1.21451	2.35834e-05				13.6955	1.02023	0.00773975	15.3219	1.2698	0.01047
TraesCS6B01G364700	Peroxisomal multifunctional enzyme type 2	6B	636472937		95.5994	1.21314	0.0401475
TraesCS1B01G417500	V-type ATP synthase beta chain	1B	641922598		5.50299	1.21016	0.02004
TraesCS6D01G060200	Peptide transporter	6D	28243048		3.46348	1.21012	0.0122905
TraesCS3D01G520000	Tryptophan synthase beta chain	3D	602455008		13.7127	1.20968	0.000209193	16.8479	1.40691	0.0226358	14.5876	1.16392	0.0155274	16.5861	1.46651	0.00868705
TraesCS3B01G021100	Glycosyltransferase	3B	8812941		8.75215	1.20452	0.00199664	12.351	1.78546	3.47613e-05	9.79643	1.60447	0.00081932	13.2216	1.56293	0.000235898
TraesCS3B01G196400	GDSL esterase/lipase	3B	223035396		27.1528	1.20157	1.01523e-08	38.9596	1.25827	0.000943202	25.9185	1.6518	5.39201e-21	40.3506	1.16606	0.00291377
TraesCS5B01G382900	Cysteine protease	5B	561693997		4.36177	1.20056	0.00108163				4.04121	1.20526	0.0321754
TraesCS6B01G386600	Zinc finger CCCH-type with G patch domain protein	6B	661463673		21.4397	1.19977	1.23555e-13
TraesCS5B01G037100	Disease resistance protein (NBS-LRR class) family	5B	41272204		6.63187	1.19577	0.000396812				6.64121	1.15467	0.0234305
TraesCS4B01G006200	Sn1-specific diacylglycerol lipase alpha	4B	3902813		8.32571	1.19279	0.00179802				7.39764	1.18776	0.0481562
TraesCS7A01G234200	Myb/SANT-like DNA-binding domain protein	7A	206574455		95.2119	1.18935	0.012276				89.9822	1.32116	0.0185742
TraesCS6A01G377200	S-adenosylmethionine decarboxylase proenzyme	6A	598575810		20.5826	1.18654	0.0485069
TraesCS6D01G400800	U-box domain-containing protein 62	6D	470319425		15.7873	1.18408	1.85784e-08				13.9986	1.23034	6.64141e-07
TraesCSU01G012500	tRNA (Adenine(58)-N(1))-methyltransferase non-catalytic subunit trm6	Un	15905771		21.2646	1.18298	1.25661e-09	23.6858	1.10863	0.00764421
TraesCS4A01G031500	3-ketoacyl-CoA synthase	4A	24556161		5.85933	1.18286	0.0118165
TraesCS3B01G131200	Heat-shock protein, putative	3B	113503661		3.35259	1.18053	0.00578794
TraesCS3B01G251400	StAR-related lipid transfer protein	3B	402460555		7.32188	1.17913	0.00368767	8.92939	1.96316	4.12799e-05	8.37901	1.33826	0.0106976
TraesCS1A01G095400	Phosphate import ATP-binding protein PstB 1	1A	91102650		4.2022	1.17866	0.000345786				4.38542	1.47248	0.000131883	5.42482	1.74575	0.00147449
TraesCS7B01G704900LC	Aldehyde oxidase	7B	687417656		137.071	1.17699	0.00129908							153.511	1.35461	0.0114597
TraesCS3D01G215600	Thionin-like protein 2	3D	291962822		13.0232	1.17619	0.0132661
TraesCS1B01G263600	Pyrimidine-specific ribonucleoside hydrolase	1B	464129216		4.23956	1.17601	0.039144
TraesCS1A01G294700	3-isopropylmalate dehydratase large subunit	1A	489600056		18.5745	1.17442	0.00271227				17.6692	1.39212	0.00620694	20.0559	1.85292	5.56315e-05				17.9209	1.23446	0.0390039
TraesCS1B01G183700	UPF0415 protein C7orf25	1B	330501850		7.98556	1.17369	0.00233372				7.53804	1.56428	0.000118667	10.4473	1.41686	0.0216659
TraesCS4A01G368600	Mannan endo-1,4-beta-mannosidase 4	4A	641381911		5.77314	1.17334	0.000171931	7.49455	1.16796	0.0250552	6.09932	1.15073	0.0174146	6.58097	1.59989	0.0021288
TraesCS6B01G459700LC	Peptidyl-tRNA hydrolase	6B	422992394		113.519	1.15998	1.06649e-10							125.621	1.26146	2.52126e-05
TraesCS6D01G399500	NBS-LRR-like resistance protein	6D	469962715		80.9955	1.15914	2.21569e-05
TraesCSU01G045500	Receptor-like protein kinase	Un	35689237		13.0105	1.15624	0.0175383	15.8655	1.87078	0.0159108	14.3931	1.3409	0.041575	18.5985	1.32979	0.00071589
TraesCS2A01G016000	Protein PLANT CADMIUM RESISTANCE 2	2A	7328300		8.07638	1.154	0.000691683				8.02977	1.31481	0.00202243
TraesCS2B01G186700	50S ribosomal protein L7/L12	2B	161419531		33.79	1.15158	6.65842e-17							37.5576	1.05965	0.0016212
TraesCS5D01G080200	Hepatocyte growth factor receptor	5D	80294855		11.4438	1.15119	0.0130549
TraesCS7D01G385500	Lipase	7D	499971647		8.90768	1.15081	0.00147915				8.58861	1.01678	0.0233297
TraesCS3B01G264300	MBOAT (membrane bound O-acyl transferase) family protein	3B	423363864		4.01267	1.14848	0.0290336
TraesCS7D01G273400	SAUR-like auxin-responsive protein family, putative	7D	263955480		3.62342	1.14787	0.00626274
TraesCS2A01G396300	Protein SPIRAL1	2A	649627879		43.4059	1.14756	5.14465e-05				41.1701	1.38717	0.000465389	54.8674	1.28518	0.0444978
TraesCS6A01G410800	BAG family molecular chaperone regulator 5	6A	613771809		9.39807	1.14698	0.0133868
TraesCS7B01G056200	UDP-glucuronate 4-epimerase 4	7B	59099576		11.7499	1.14358	0.0458666
TraesCS5A01G503900	Late embryogenesis abundant protein	5A	669584343		43.5905	1.14215	1.30936e-05	50.1388	1.23715	0.0102613				48.6435	1.35369	0.00365785
TraesCS1B01G429600	F-box protein	1B	654240366		7.16292	1.13654	0.0340507				6.34948	1.47548	0.0335076
TraesCS2B01G567100	Serine/threonine-protein kinase	2B	758121263		18.9345	1.13618	1.1503e-06
TraesCS6B01G169200LC	Toll-Interleukin-Resistance (TIR) domain family protein	6B	103574515		4.82005	1.1278	0.00145063
TraesCS5A01G172200LC	Auxin response factor	5A	180339767		11.0371	1.12065	0.0007187	14.168	1.58302	0.000423146	12.677	1.2081	0.0092297	13.6945	1.72536	7.64849e-13
TraesCS2B01G527900	Sec14p-like phosphatidylinositol transfer family protein	2B	722329542		3.87751	1.1195	0.000951068
TraesCS6A01G297500	Blue copper protein	6A	531049815		15.3018	1.1156	2.30419e-06	18.885	1.20686	0.0178862	15.1682	1.17822	0.00197189	19.63	1.08724	0.0215308
TraesCS1A01G107500	Fasciclin-like arabinogalactan protein	1A	105885702		54.9852	1.10986	7.54093e-05				57.3715	1.28248	2.288e-05	69.2143	1.45273	9.32242e-06
TraesCS1B01G011900	Copper ion-binding protein, putative	1B	5759561		6.21144	1.10544	0.000418029				6.55617	1.38787	0.000495438	7.71287	1.67795	0.00299601
TraesCS2B01G168000	ATP synthase mitochondrial F1 complex assembly factor 2	2B	140847483		40.4028	1.10408	0.000727404				38.9593	1.15325	0.0117944	41.3164	1.69397	1.26209e-07				37.2716	1.11642	0.0164216
TraesCS3A01G480400	Beta-1,3-glucanase	3A	711296438		6.5714	1.10303	0.00195233				5.89906	1.18737	0.0240411
TraesCS2B01G605800	Acetyl-coenzyme A synthetase	2B	787056986		25.6776	1.10293	4.06307e-06	27.8219	1.07622	0.00886488				27.5006	1.11379	0.00766648
TraesCS6B01G258100	IKI3 family protein	6B	463396017		8.67045	1.09848	0.00226661
TraesCS6A01G166300LC	Alpha-fetoprotein	6A	97310847		12.0507	1.09367	0.00506787							12.913	1.20546	0.0235583
TraesCS6B01G112100LC	P-loop containing nucleoside triphosphate hydrolases superfamily protein	6B	59416096		9.33736	1.09342	1.0322e-06	11.8187	1.06221	0.0464513	9.06529	1.19575	0.000305157	11.7704	1.06951	0.0499761
TraesCS2B01G442700	Pathogenesis-related protein 1	2B	636092681		8.48011	1.09294	0.006225				7.62483	1.20525	0.0198018
TraesCS5B01G403600	Gibberellin-regulated protein 1	5B	580124315		8.3447	1.09221	0.0033352	10.8145	1.22624	0.0406909	7.43333	1.56785	0.000309066
TraesCS2B01G620600	BTB/POZ domain-containing protein TNFAIP1 isoform 1	2B	795045706		36.4689	1.0897	0.00326231				36.3519	1.23968	0.0161646	44.6831	1.32889	0.0166633
TraesCS5A01G582800LC	Tryptophan aminotransferase-related protein 4	5A	613542567		14.0281	1.08412	0.00154704				12.4291	1.65873	2.62809e-08	19.1672	1.19654	0.0282816
TraesCS2B01G615800	Peroxidase	2B	793504879		29.6867	1.08217	0.0161716	33.216	1.91162	0.0151556				37.0891	1.50894	0.0342859
TraesCS3D01G517300	Abscisic stress ripening protein	3D	600594345		10.0827	1.08178	0.00160301				10.2412	1.29524	0.000814877	11.0229	1.90581	2.51625e-05
TraesCS4D01G096800	Ankyrin repeat protein-like	4D	73383346		4.16886	1.08031	0.00333711				4.3162	1.40218	0.00140906	5.44804	1.52092	0.0282098
TraesCS6B01G177800	Kinase	6B	195805195		30.9194	1.07854	0.00960553				30.5132	1.11819	0.0422137
TraesCS1D01G147800	Fatty acid hydroxylase superfamily	1D	203866614		9.97948	1.07646	0.00069832							10.4612	1.27745	0.00476574
TraesCS1A01G039100	B3 domain-containing protein	1A	21281531		41.5557	1.07474	1.68589e-05				41.8988	1.41781	6.64945e-08	51.4056	1.60972	0.000101564
AML47755	Leucyl-tRNA synthase	3B	8220000		95.9635	1.0711	4.95725e-05	118.747	1.39288	0.000345535	100.295	1.21438	0.000367098	127.022	1.19484	0.00128854
TraesCS7B01G418900	Aldehyde oxidase, putative	7B	687419611		162.716	1.07064	0.00604683
TraesCS5A01G439700	Pathogenesis-related protein 1	5A	621023308		7.17546	1.06442	0.00241636				6.80388	1.43705	0.00191788
TraesCS6B01G355300	N-acetyltransferase	6B	623442844		4.25215	1.06397	0.022134
TraesCS3B01G196700	Polynucleotidyl transferase ribonuclease H-like superfamily protein	3B	223557832		27.5395	1.06184	2.01618e-09	40.0487	1.08545	0.000971908	27.374	1.45338	3.00935e-20	37.1231	1.31694	6.01594e-07
TraesCS7B01G338200	Copper transport protein family	7B	592624374		379.213	1.06178	5.6405e-08	540.342	1.07958	0.0153545	373.562	1.4311	2.29356e-09	514.478	1.24328	5.06856e-06
TraesCS6B01G150200	Protein kinase, putative	6B	151297347		15.8684	1.06091	6.85701e-05				15.4056	1.093	0.00545408	18.5542	1.16135	0.0154243
TraesCS2B01G167600	Pre-mRNA-splicing factor SYF1	2B	140763359		81.4874	1.06017	0.000544749				81.3711	1.04682	0.0215812	84.1733	1.59474	1.45565e-08
TraesCS4D01G301100	MADS box transcription factor	4D	469304324		7.97301	1.0599	0.00306286				7.70001	1.1066	0.0191184
TraesCS6A01G153800	Proline-rich protein PRCC	6A	141855192		23.1707	1.0579	0.00357095				21.4401	1.10996	0.0349703	23.6505	1.49283	0.00157005
TraesCS2B01G225700LC	F-box protein	2B	137189829		4.88538	1.05746	0.000494498
TraesCS3A01G218200LC	PHD finger protein-like	3A	182630945		7.32017	1.05542	0.000852866
TraesCS3B01G236500	Receptor-like protein kinase	3B	369102629		7.52083	1.05511	0.0110989	7.83623	2.10698	1.04724e-07	8.21575	1.15652	0.0471691
TraesCS2B01G370900	LETM1 and EF-hand domain-containing protein 1, mitochondrial	2B	529101082		11.8909	1.04521	1.90335e-05							13.4847	1.161	0.0048634
TraesCS1D01G040000	Inorganic pyrophosphatase family protein	1D	19186620		49.3108	1.04269	6.10431e-08				50.2933	1.27325	5.09579e-08	57.9746	1.59758	2.59889e-07
TraesCS2B01G043700	NBS-LRR-like resistance protein	2B	20364421		20.8131	1.04064	0.000245744				20.2398	1.13149	0.000989558	23.3073	1.3811	0.00334129
TraesCS4A01G352100LC	Retrotransposon protein, putative, Ty3-gypsy subclass	4A	509666723		9.86038	1.03796	0.000457046				9.55107	1.17901	0.00371899
TraesCS3B01G246500	Protein GAMETE EXPRESSED 3	3B	392294122		3.64126	1.03771	0.0283544
TraesCS7B01G032300	Protein DETOXIFICATION	7B	32408246		4.10966	1.03759	0.00196245
TraesCS5A01G428900	Protein kinase	5A	613539449		38.9788	1.03563	0.000536259				34.3246	1.58514	4.62477e-10	52.5407	1.12384	0.0277318
TraesCS7B01G340200	EH domain-containing protein 1	7B	594416680		96.6382	1.03334	7.7805e-15
TraesCS2A01G344800	RAN guanine nucleotide release factor	2A	582634002		10.1951	1.03309	0.0363201
TraesCS5B01G176100	RNA binding protein, putative	5B	322138845		35.1609	1.03279	9.30534e-10							39.0643	1.13601	2.15628e-07
TraesCS5A01G546700	Arsenate reductase	5A	700666391		19.8326	1.02871	9.3862e-14	23.0964	1.05525	0.000786458				23.127	1.06795	0.000189182
TraesCS2B01G607200	Receptor kinase, putative	2B	787963388		55.9282	1.02793	0.00144322	57.2102	1.04608	0.0471482
TraesCS2D01G576900	HXXXD-type acyl-transferase family protein	2D	640240669		30.0378	1.02662	0.0210156				30.4289	1.29586	0.0206357
TraesCS3B01G011600	WAT1-related protein	3B	5199155		57.1986	1.02538	0.0376029				59.7813	1.20065	0.0325323
TraesCS6A01G117300	Kinetochore protein nuf2, putative	6A	87752960		35.1227	1.01885	0.000255285							37.7246	1.12903	0.010496
TraesCSU01G348400LC	ATP-dependent RNA helicase	Un	277498504		9.37812	1.01568	5.36123e-10
TraesCS2B01G020300	Zinc finger family protein	2B	9724162		5.64381	1.01178	0.00100494
TraesCS1D01G019100	UDP-glycosyltransferase	1D	8269575		4.86396	1.011	0.0138538				4.8393	1.17989	0.0377682	5.74063	1.38268	0.0242618
TraesCS3A01G535900LC	Deoxyuridine 5'-triphosphate nucleotidohydrolase	3A	642605385		5.41814	1.01099	0.0215615
TraesCS2B01G181900	3-isopropylmalate dehydratase large subunit	2B	156914479		28.3782	1.00953	0.000553342
TraesCS1A01G395900	IBR domain-containing protein	1A	561595857		6.84143	1.00898	0.00417581				6.40354	1.29108	0.0197051	7.83949	1.43771	0.0129211
TraesCS5A01G582700LC	Protein-L-isoaspartate O-methyltransferase	5A	613539952		6.17745	1.00865	0.0305906				5.44715	1.55171	0.000388809
TraesCS3B01G532600LC	50S ribosomal protein L1	3B	558505288		11.0541	1.00741	0.00743058	10.4257	1.40979	0.00643701
TraesCS5A01G018000LC	transcription regulator NOT2/NOT3/NOT5 family protein	5A	10040146		4.42024	1.00504	0.00728653
TraesCS3A01G318500	Methylthioribulose-1-phosphate dehydratase	3A	559624952		29.8081	1.00439	1.91579e-08				30.4027	1.18586	1.62885e-08	33.9158	1.56092	2.27677e-10
TraesCS3B01G102800	Pyrimidine-specific ribonucleoside hydrolase	3B	69603487		24.8715	1.00079	3.03767e-06	31.4647	1.21793	0.00599182	24.3717	1.2815	2.44569e-09
TraesCS1B01G097300	Lecithin-cholesterol acyltransferase-like 1	1B	101526840		5.13421	-1.00008	0.0257641
TraesCS1B01G254200LC	NAD(P)H dehydrogenase B3	1B	207371853		5.03973	-1.00021	0.0418113
TraesCS1B01G111300LC	Armadillo repeat-containing kinesin-like protein 3	1B	57433362		12.4484	-1.00257	0.00132184				11.5442	-1.40189	0.000632128
TraesCS4A01G464300	RING finger family protein	4A	728129359		8.84227	-1.00366	0.00504914				8.40944	-1.11499	0.00888783	9.04223	-1.31656	0.0122366
TraesCS7D01G129500LC	Enoyl-CoA hydratase 2, peroxisomal	7D	60463001		7.49295	-1.00384	0.0048355
TraesCS1B01G136900	F-box/WD repeat-containing protein 7	1B	174783887		15.5957	-1.00433	1.508e-05	13.9775	-1.41721	0.0444394	14.8304	-1.40977	4.47886e-06	14.0849	-1.42357	0.00372645
TraesCS1B01G230600LC	NADH-quinone oxidoreductase subunit L	1B	175667957		34.4574	-1.0046	0.00416129				33.4511	-1.9001	4.6961e-07
TraesCS7B01G313400	Cytochrome P450	7B	559633277		4.87794	-1.00586	0.0490457
TraesCS1B01G083200	Retrotransposon protein, putative, Ty1-copia subclass	1B	67055517		20.2172	-1.00649	1.11401e-05	17.2129	-1.15012	0.0305341	19.38	-1.26127	0.00050577	19.6827	-1.38006	0.000645091
TraesCS1B01G271600LC	DNAJ heat shock N-terminal domain-containing protein	1B	229965059		54.9969	-1.00733	0.000678644				52.9699	-1.7138	5.25756e-06	49.6126	-1.74229	0.028354
TraesCS2D01G187400	RNA binding protein	2D	131276985		38.499	-1.00768	0.000982419	31.5033	-1.27502	0.0234525	37.2859	-1.44996	0.000163472	36.11	-1.49623	0.00015078
TraesCS6A01G434300LC	Patatin	6A	479107853		5.09945	-1.00786	0.0384267
TraesCS2B01G058500	Sugar transporter, putative	2B	28424409		34.5932	-1.00841	0.00195804
TraesCS5D01G507300	Epoxide hydrolase 2	5D	532650226		19.2641	-1.00844	6.35362e-05				20.2823	-1.1545	0.000895862
TraesCS6A01G323900	Cytochrome P450 family protein, expressed	6A	557397863		72.3498	-1.00847	1.21241e-12	75.4126	-1.07608	0.0010988
TraesCS6B01G011400	Rhodanese-related sulfurtransferase	6B	6789212		7.0229	-1.00874	0.0495214				6.68927	-1.50342	0.0431751
TraesCS5A01G258800	Transcription factor jumonji (jmj) family protein / zinc finger (C5HC2 type) family protein	5A	473326915		105.637	-1.00901	0.027497
TraesCS2B01G599400LC	Mitochondrial carrier protein	2B	557048040		5.35454	-1.01005	0.0187887				5.56843	-1.7654	0.00265253
TraesCS4B01G070300	Dormancy-associated protein/auxin-repressed protein	4B	64611167		256.202	-1.01008	4.55622e-08				257.339	-1.22213	2.64072e-07	241.57	-1.19398	1.6601e-06
TraesCS5D01G504200	DNA polymerase epsilon catalytic subunit A, putative	5D	530775073		12.5114	-1.01011	8.7846e-05				12.2984	-1.05367	0.00515964	12.459	-1.14291	0.00201896
TraesCS4B01G277800	MADS box transcription factor	4B	559647872		9.23156	-1.01021	0.0003473
TraesCS5B01G181600	F-box family protein	5B	331250493		5.70686	-1.01106	0.00716256
TraesCS1B01G115300	Xyloglucan 6-xylosyltransferase 1	1B	135825686		16.6233	-1.01112	5.33946e-05				16.0721	-1.6068	2.92597e-06	14.5032	-1.55949	0.0352669
TraesCS2B01G069200LC	P-loop nucleoside triphosphate hydrolases superfamily protein with CH (Calponin Homology) domain-containing protein	2B	32064677		43.5741	-1.01161	0.000126769				44.3747	-1.11779	0.0116756
TraesCS6B01G539300LC	Maturase K	6B	516543721		10.2572	-1.01186	0.00299967				10.0374	-1.00152	0.00976863
TraesCS3D01G416400	DUF506 family protein	3D	527674493		6.31614	-1.01187	0.000494792
TraesCS3A01G481500	Beta-1,3-glucanase	3A	712545115		10.2071	-1.01235	0.0222286
TraesCS1B01G250400LC	Transposon protein, putative, Mutator sub-class	1B	200644313		42.542	-1.01238	0.000304066				40.3227	-1.74087	5.38844e-07	36.4674	-1.7068	0.0274801
TraesCS6D01G522600LC	Glycerol-1-phosphate dehydrogenase [NAD(P)+]	6D	473076725		8.47799	-1.01325	0.0048581
TraesCS3D01G340300LC	Gag polyprotein	3D	349664465		26.8491	-1.01332	7.90668e-05
TraesCS7D01G027900LC	NBS-LRR-like resistance protein	7D	10038710		5.68049	-1.01333	0.0113949
TraesCS1B01G256700LC	Retrotransposon protein, putative, unclassified	1B	212426391		22.1885	-1.01357	0.000111234	18.8662	-2.04785	0.0448825	20.6448	-2.00024	5.49286e-11	18.6615	-2.01685	0.00160215
TraesCS2D01G352600	Cysteine desulfurase	2D	450990532		5.55953	-1.01493	0.0246034
TraesCS1B01G130600	Ubiquitin carboxyl-terminal hydrolase-like protein	1B	162279217		404.666	-1.01496	0.0237304				367.719	-1.68123	0.00535908
TraesCS1B01G142000	Phosphotransferase	1B	189715362		20.3391	-1.01506	0.000256591				19.4738	-1.59529	2.60305e-05	18.3359	-1.60109	0.0219888
TraesCS5B01G011700	Alpha-galactosidase	5B	11513382		10.2516	-1.01588	0.0162154							15.2115	-1.81532	0.000147201				14.3566	-1.15311	0.0303161	11.7618	-1.09397	0.0207294
TraesCS7B01G124900	Extracellular calcium-sensing receptor	7B	146047145		5.00523	-1.01677	0.0131457
TraesCS3B01G143600	tRNA (Guanine(10)-N2)-methyltransferase-like protein	3B	132393015		12.2133	-1.01696	0.000136323	11.3657	-1.97464	0.000272613	11.8242	-1.90717	5.58631e-07	8.89397	-1.55411	0.00823828
TraesCS6A01G207600	Amine oxidase	6A	371231017		27.668	-1.01709	0.00306717
TraesCS1A01G220600LC	Gypsy/Ty3 element polyprotein, putative	1A	219365368		6.14714	-1.01718	0.0446157
TraesCS6D01G329100LC	GTP-binding nuclear protein	6D	318563716		56.0134	-1.01792	0.0250477
TraesCS4B01G603900LC	seven transmembrane domain protein	4B	667612534		39.9834	-1.01825	0.00737902
TraesCS3B01G549000	Alpha-dioxygenase 2	3B	784485153		6.75142	-1.0188	0.0198984
TraesCS2B01G444500	Bifunctional inhibitor/lipid-transfer protein/seed storage 2S albumin-like protein	2B	637444753		7.21926	-1.01948	0.0432119
TraesCS4A01G034200LC	Zinc finger protein, putative	4A	29450534		6.91981	-1.01957	0.00303481				6.79656	-1.10831	0.0298291
TraesCS6B01G363800LC	Hexosyltransferase	6B	297531884		20.9439	-1.01973	9.12056e-06				20.6925	-1.17843	0.000330621
TraesCSU01G395600LC	receptor kinase 1	Un	303829612		5.14189	-1.02004	0.023328
TraesCS1B01G103700	2-oxoglutarate (2OG) and Fe(II)-dependent oxygenase superfamily protein	1B	113563890		38.84	-1.02021	6.83114e-05				36.4491	-1.46051	4.03412e-05	35.8045	-1.54425	0.0324667
TraesCS7B01G234500	RING/U-box superfamily protein	7B	438879662		5.56781	-1.02094	0.00352869				5.681	-1.02329	0.037567
TraesCS3B01G112900LC	Histone H4 transcription factor	3B	58471271		6.47163	-1.02138	0.00691562				6.64439	-1.77742	0.000677964
TraesCS1B01G141000	Tectonin beta-propeller repeat-containing protein 1	1B	188260589		8.29969	-1.02166	0.0306387	6.39709	-1.95108	0.00497616	8.76716	-2.28854	5.17001e-05
TraesCS5A01G342900	Aquaporin	5A	547719060		4.8768	-1.02226	0.00530604
TraesCS1B01G127400	transcription factor-like protein	1B	156565522		56.0667	-1.0224	5.33946e-05	50.7819	-1.62446	0.0141002	53.9791	-1.59978	2.23279e-07	46.257	-1.45864	0.00986426
TraesCS2D01G311500LC	Cold regulated protein 27	2D	283963517		129.025	-1.02248	0.00477757
TraesCSU01G056300	1-deoxy-D-xylulose 5-phosphate reductoisomerase	Un	43324386		170.622	-1.02355	1.86172e-06				169.792	-1.0562	0.000138495	164.156	-1.06004	0.00101891
TraesCS3B01G001400	Transcription initiation factor TFIID subunit 4B	3B	1462801		22.557	-1.024	0.0413006	17.5487	-2.54803	0.00770842	19.9288	-2.5622	3.67538e-05	20.8221	-2.8084	0.000302724
TraesCS3D01G268200LC	alpha/beta-Hydrolases superfamily protein	3D	246574468		10.0244	-1.024	0.0172517
TraesCS1B01G116200	4-hydroxyphenylacetate decarboxylase small subunit	1B	136909534		5.61931	-1.02401	0.0193272				5.18573	-1.83449	0.0035424	5.36476	-2.03232	0.00358676
TraesCS3A01G025300	GDSL esterase/lipase	3A	13409566		46.9273	-1.02405	0.00028396				44.5962	-1.33171	0.00146766
TraesCS6B01G539400LC	Eukaryotic translation initiation factor 3 subunit D-1	6B	516546699		6.95027	-1.0246	0.00374644				6.86974	-1.02677	0.0494806
TraesCS5D01G052000LC	Protease HtpX	5D	33074561		8.25443	-1.02588	0.010105				7.69028	-1.36998	0.0171169	8.0669	-1.53286	0.0252273
TraesCS6B01G502500LC	Aminotransferase-like, plant mobile domain-containing protein	6B	471170026		12.4509	-1.02593	0.00570043				12.6575	-1.49117	0.00196013
TraesCSU01G443500LC	Disease resistance protein RPM1	Un	325007569		18.0917	-1.02595	0.00251529	16.9454	-1.41591	0.0206309	18.089	-1.40417	0.000988354
TraesCS7D01G523800	Carbonic anhydrase	7D	620142831		32.0268	-1.02654	0.0110875							36.9658	-1.46993	0.0206874
TraesCS4D01G238600	Non-symbiotic hemoglobin	4D	400785977		5.69054	-1.02814	0.0365988				4.83517	-1.36103	0.0466348	6.13425	-1.87223	0.00395986
TraesCS4B01G532900LC	Phosphoserine aminotransferase	4B	625214775		20.5674	-1.02829	0.000733508				22.4332	-1.33933	6.73429e-05	18.2817	-1.07953	0.00680612
TraesCS3B01G038700	Trypsin inhibitor	3B	18567581		24.6406	-1.02832	0.00275598				24.419	-1.13325	0.0068553
TraesCS1B01G000600	50S ribosomal protein L28	1B	1198798		121.331	-1.02878	0.000729915				117.298	-1.49107	7.90332e-05
TraesCS1B01G137000	evolutionarily conserved C-terminal region 5	1B	174783915		17.2918	-1.02882	4.78889e-05				16.216	-1.60885	2.14584e-06	14.8965	-1.5886	0.0132662
TraesCS1B01G259400LC	Retrotransposon protein, putative, unclassified	1B	215536748		5.47236	-1.02906	0.00965991
TraesCS1B01G130800	RelA/SpoT-like protein	1B	162779189		109.999	-1.03034	0.000852866				108.251	-1.67925	8.64195e-05
TraesCS2A01G488900	Beta-fructofuranosidase, insoluble isoenzyme 1	2A	722830824		496.183	-1.03053	1.96481e-09				501.961	-1.10797	1.14263e-05	464.29	-1.03779	0.00355435
TraesCS1B01G018400	Zinc finger CCCH domain protein	1B	8834040		44.0976	-1.03071	0.0031499				42.5992	-1.5878	0.000257771
TraesCS1B01G104500	Carboxypeptidase	1B	115278974		17.7537	-1.03216	0.000207133				16.7806	-1.28545	0.00138001	17.0307	-1.41854	0.0238688
TraesCS6D01G392100	Xyloglucan endotransglucosylase/hydrolase	6D	466907865		36.9266	-1.03236	0.000267481				38.8562	-1.24166	0.00114571	35.4655	-1.16443	0.00713994
TraesCS3D01G023100	Glycosyltransferase	3D	7336477		9.41125	-1.03252	0.0346948
TraesCS1B01G115900	Peroxidase	1B	136312346		8.96089	-1.03332	0.00821705				8.89289	-1.84601	0.000504471	9.07962	-2.04851	0.00242415
TraesCS7A01G023800	Benzyl alcohol O-benzoyltransferase	7A	9411199		109.67	-1.03337	0.00793903
TraesCS1B01G026600	Aldo-keto reductase	1B	12942840		6.67332	-1.03418	0.0272642				6.23006	-2.05846	0.00110146	6.14108	-2.19509	0.00314636
TraesCS5A01G556500	Kinesin-like protein	5A	707821855		168.721	-1.03452	0.00719079
TraesCS1B01G256500LC	AT hook motif-containing protein, putative	1B	212423783		9.87902	-1.03475	0.00143504				9.88025	-1.29754	0.00753216
TraesCS1A01G011300	Dirigent protein	1A	6654551		509.693	-1.03506	0.0248214
TraesCS3A01G048700	Protein kinase family protein	3A	25932414		10.8236	-1.03551	0.0105526				11.604	-1.27471	0.017079
TraesCS2D01G473800LC	Fatty acid synthase	2D	471069464		7.40142	-1.03664	0.0118682				7.25246	-1.42697	0.0237113
TraesCS7A01G764400LC	LETM1 and EF-hand domain-containing protein anon-60Da, mitochondrial	7A	713759053		12.7176	-1.03672	0.0169225
TraesCS6D01G171200LC	zinc finger (C2H2 type) family protein	6D	108249044		8.16263	-1.03689	0.00721547
TraesCS3D01G016700LC	Translation elongation factor EF1A/initiation factor IF2gamma family protein	3D	7178106		23.25	-1.03855	0.0237486
TraesCSU01G055900	Rer1 protein, putative	Un	43286057		30.5589	-1.03935	0.00778806				31.3609	-1.13534	0.0321826
TraesCS1B01G089100	Kinase family protein	1B	88002204		18.5603	-1.0394	0.000169859	16.7222	-2.09322	0.000981864	17.4967	-1.98979	7.02338e-09	14.3999	-1.84275	0.000508187
TraesCS2B01G325800	Serpin-like protein	2B	465646444		5.53352	-1.03978	0.0014391
TraesCS1B01G260800LC	Dihydroorotate dehydrogenase (quinone)	1B	216527740		17.7239	-1.04035	0.000165825				16.4779	-1.6448	3.74447e-06	17.1925	-1.8369	0.0254484
TraesCS1B01G141700LC	Ulp1 protease family protein	1B	85769443		109.252	-1.04048	0.00562436				101.151	-1.81293	0.000200927
TraesCS1B01G055300	F-box domain containing protein	1B	38065955		24.6473	-1.04111	0.000924014				23.6572	-1.82381	6.64141e-07	21.7544	-1.83926	0.0158154
TraesCS6A01G373900	Oxidoreductase family protein	6A	596895363		149.38	-1.04232	0.0225422
TraesCS1B01G722100LC	4-hydroxy-tetrahydrodipicolinate synthase	1B	651546097		9.30374	-1.04266	0.0202113
TraesCS1B01G050200	Ankyrin repeat family protein	1B	30393963		105.267	-1.04338	0.000176674	84.7002	-1.45987	0.0315551	100.165	-1.60895	1.12704e-06	99.6597	-1.7254	0.00028135
TraesCS2B01G880900LC	Small glutamine-rich tetratricopeptide repeat-containing protein beta	2B	777649017		8.61976	-1.04391	0.00257654							11.1029	-1.46233	0.00191741
TraesCS1B01G033300	Guanine nucleotide-binding protein G(k) subunit alpha	1B	16223548		5.99063	-1.04491	0.0498944				5.62397	-1.6657	0.0475596
TraesCS2B01G438600LC	weak chloroplast movement under blue light protein (DUF827)	2B	390977577		10.5144	-1.04499	0.000149083
TraesCS5D01G629200LC	Purple acid phosphatase	5D	548531371		8.29542	-1.0457	0.00294439				7.80161	-1.15305	0.0236123
TraesCS2B01G323000LC	ATP synthase subunit alpha, chloroplastic	2B	236318222		18.7859	-1.0461	0.000456999				18.1793	-1.06712	0.00926905
TraesCS6B01G332900	Alpha-galactosidase	6B	584222806		6.74495	-1.0475	0.0114702							7.75808	-1.34665	0.0383522
TraesCS1B01G250700LC	Ephrin type-A receptor 2	1B	200985010		13.2633	-1.04808	0.000703612				12.0452	-1.71236	7.84117e-07	13.5092	-2.05093	0.00138288
TraesCS3D01G396800	Tropinone reductase-like protein	3D	511441681		12.6409	-1.04809	0.0176052
TraesCS4A01G474800	Leucine-rich receptor-like protein kinase family protein	4A	733989940		212.177	-1.04836	0.000629956
TraesCS3D01G001400	Glycosyltransferase	3D	707879		49.5465	-1.04847	0.0124491				51.1274	-1.28976	0.0259997
TraesCS1B01G000400	Disease resistance protein (TIR-NBS-LRR class) family	1B	721872		22.5284	-1.04874	0.0145763	16.9662	-2.05116	0.0264057	21.5098	-2.23654	2.05012e-07	19.4083	-2.26621	0.0134381
TraesCS6A01G512600LC	N-acyl homoserine lactonase AiiB	6A	558998189		10.5791	-1.04984	0.00630576				10.9289	-1.13406	0.0406381
TraesCSU01G105900	Kinase family protein	Un	92743842		25.3797	-1.04996	0.00224477				25.0755	-1.04447	0.0323533
TraesCS2D01G258900	N-succinylglutamate 5-semialdehyde dehydrogenase	2D	314795144		5.24685	-1.05044	0.00285968							5.70331	-1.25532	0.0230738
TraesCS5A01G500700LC	zinc finger MYM-type-like protein	5A	560461191		6.40568	-1.05127	0.0495419
TraesCS7B01G694400LC	Chaperone protein dnaJ	7B	681688275		18.352	-1.0515	0.00598622
TraesCSU01G456600LC	Keratin, type I cytoskeletal 19	Un	330742279		19.7225	-1.05203	0.00783092				19.6339	-1.3619	0.0126172
TraesCS5D01G446000LC	cytochrome P450, family 71, subfamily B, polypeptide 13	5D	437150549		13.1149	-1.05363	0.0498267
TraesCS2B01G588600	Thioredoxin	2B	775334948		84.6271	-1.05401	0.000628415
TraesCS1B01G276500	Wound-induced protease inhibitor	1B	484297162		58.9797	-1.05524	6.6055e-05	63.0059	-1.33593	0.0148617	57.2037	-1.0957	0.00191631
TraesCSU01G015200	Fasciclin-like arabinogalactan-protein-like	Un	17426254		16.7029	-1.05758	0.0210235
TraesCS1B01G163900LC	Receptor-interacting serine/threonine-protein kinase 4	1B	106888368		5.41748	-1.05772	0.0177782
TraesCS1A01G295800	Phosphatidylethanolamine-binding protein	1A	490794343		12.1742	-1.05851	0.00750204
TraesCS3D01G453200LC	Leucine-rich repeat protein kinase family protein	3D	484114021		15.6757	-1.05994	1.32224e-06				15.3693	-1.25602	0.000166041
TraesCS3D01G020200	Eukaryotic translation initiation factor 3 subunit A	3D	6745803		646.528	-1.06	9.91792e-06	615.126	-1.00125	0.0403565	644.72	-1.01948	0.00108506
TraesCS3B01G675300LC	Apolipoprotein C-IV	3B	709498079		14.5428	-1.06039	0.00107768	13.0911	-1.28222	0.0293661	13.422	-1.22677	0.0113052	14.634	-1.45545	0.00248288
TraesCS6D01G364300	Phosphate transporter PHO1-like protein	6D	454221609		11.6077	-1.06063	0.00663269				11.3209	-1.44095	0.0107306	12.1919	-1.67512	0.00707778
TraesCS1B01G147400LC	HXXXD-type acyl-transferase family protein	1B	91965998		19.1198	-1.06114	0.000105586				18.1331	-1.58054	3.97191e-05	16.6229	-1.5716	0.0449814
TraesCS2D01G477900LC	Ulp1 protease family, C-terminal catalytic domain containing protein	2D	474644220		48.9973	-1.06144	1.27341e-05				45.9545	-1.27354	0.000336743	45.1993	-1.32822	0.0422391
TraesCS5A01G037600	Cytochrome P450 family protein, expressed	5A	34908825		9.55147	-1.06166	0.00063979				9.14101	-1.22548	0.00654126	8.90567	-1.26439	0.00920435
TraesCS6A01G036400	lectin-receptor kinase	6A	17910689		9.10673	-1.06343	0.0332749				9.15891	-1.64959	0.00932054
TraesCS2A01G481700	Anthocyanidin reductase	2A	718818747		11.7762	-1.06423	0.000892966							12.6866	-1.08201	0.017552
TraesCS5A01G516000LC	Transposon Ty3-G Gag-Pol polyprotein	5A	568271772		8.37414	-1.06445	0.00159985				7.8221	-1.33337	0.0115065
TraesCS4D01G252500	Cysteine proteinase inhibitor	4D	421319100		6.66426	-1.06452	0.0320095							10.0045	-1.52291	0.0225057				9.04538	-1.24277	0.0155979
TraesCS1B01G006600	Charged multivesicular body protein 5	1B	3946948		5.18146	-1.0649	0.0387333				4.98012	-1.63007	0.0132033
TraesCS2B01G623800	Aminotransferase-like, plant mobile domain family protein	2B	797242782		28.5148	-1.06505	0.00428574
TraesCS5A01G554300	Lipid transfer protein	5A	706270578		324.435	-1.06506	0.0011229							390.073	-1.37675	0.00107196
TraesCS1B01G142900	Peptidase M50 family protein	1B	192689437		13.6885	-1.0651	0.000191324	11.2026	-1.63406	0.0132628	13.4484	-1.77704	3.10713e-07	11.4314	-1.65611	0.000362865
TraesCS1B01G130600LC	HhH-GPD base excision DNA repair family protein	1B	71621211		52.2377	-1.06556	0.0467353				50.8384	-2.06445	0.000327564	44.861	-2.31853	0.0396938
TraesCS7B01G128000	Eukaryotic aspartyl protease family protein	7B	153423354		40.543	-1.06626	1.20429e-06				40.9102	-1.0129	0.00137445	39.5391	-1.00821	0.00499345
TraesCS4B01G009700	Cytochrome P450 family protein, expressed	4B	6083790		16.2386	-1.06702	0.0251724
TraesCS1B01G054900	Chaperone protein dnaJ	1B	36265890		70.6786	-1.06975	0.000174174				64.6	-1.54018	4.62945e-06	76.2325	-1.92787	0.0004198
TraesCS1B01G030600LC	Translation initiation factor IF-2	1B	15451181		6.4215	-1.07159	0.00680974
TraesCS1B01G045800	Disease resistance protein RPM1	1B	25818752		24.1243	-1.07219	0.0363966
TraesCS7A01G271400	ER lumen protein-retaining receptor-like	7A	284726900		45.3919	-1.0723	0.035371
TraesCS6B01G102200	Late embryogenesis abundant protein	6B	80007775		5.35037	-1.07235	0.0184509	5.91686	-1.78328	0.0403565
TraesCS3B01G436300	Legume-specific protein	3B	674666936		19.5569	-1.07329	3.0868e-07				19.6514	-1.26867	1.52537e-05	19.1576	-1.30112	4.02123e-06
TraesCS5A01G002700LC	Transposase	5A	2099323		7.56747	-1.07585	0.0414609
TraesCS2B01G123400	B12D protein	2B	91034051		9.42102	-1.07609	2.80511e-05	10.0417	-1.17746	0.0113426
TraesCS6A01G175400	Protein sel-1-like protein 1	6A	190685996		7.9425	-1.07628	0.00306462							8.83233	-1.12908	0.0350268
TraesCS1B01G137200	Pentatricopeptide repeat-containing protein	1B	175275238		28.5212	-1.0775	6.41439e-05				27.6042	-1.75631	8.10386e-07	23.5452	-1.6542	0.0324233
TraesCS3D01G211500	Beta-galactosidase	3D	282939104		25.6412	-1.07876	0.000265098
TraesCS1B01G117400	1-aminocyclopropane-1-carboxylate oxidase	1B	137452918		44.1207	-1.08082	0.000163396				42.5445	-1.75765	9.84862e-07	38.0404	-1.71552	0.0227969
TraesCS1B01G251500LC	AT hook motif-containing protein, putative, expressed	1B	203654287		14.1262	-1.08124	0.000211448				13.8934	-1.88748	3.01627e-08	12.5264	-1.88251	0.00175598
TraesCS1B01G016800	cytochrome oxidase assembly protein	1B	8180388		24.109	-1.08168	0.000428604				22.6402	-1.59772	8.81673e-05
TraesCS1B01G103000	F-box/FBD-like domains containing protein	1B	113212292		7.07781	-1.08211	0.0214663				7.39595	-1.81146	0.000822564
TraesCS5A01G188300	Strictosidine synthase family protein	5A	389763145		22.2168	-1.08225	6.7523e-05							24.8556	-1.0231	0.0272327
TraesCS1B01G108400LC	Disease resistance protein (CC-NBS-LRR)	1B	56497121		4.67875	-1.08398	0.0082529
TraesCS1B01G102300	Armadillo/beta-catenin-like repeat family protein, expressed	1B	112357005		8.71857	-1.08414	0.000274604				8.65385	-1.27333	0.000909076
TraesCS2A01G551800	Tetratricopeptide repeat	2A	758392062		7.24546	-1.08463	0.008207
TraesCS1A01G437300LC	U5 small nuclear ribonucleoprotein 40 kDa protein	1A	490087122		4.7159	-1.08495	0.0425086							5.56602	-1.38713	0.0328554
TraesCS1B01G073500LC	Metacaspase	1B	39553594		3.40234	-1.08566	0.0462988
TraesCS3A01G397500LC	RNA-directed DNA polymerase (reverse transcriptase)-related family protein	3A	493667905		10.9054	-1.08574	6.68662e-05	8.77872	-1.58434	0.00930957	10.0901	-1.66605	4.40044e-06	10.7006	-1.8909	2.38107e-05
TraesCS6B01G502400LC	Actin binding Calponin homology (CH) domain-containing protein	6B	471169225		19.73	-1.08641	0.00205833				20.0693	-1.43142	0.00237048
TraesCS7B01G672000LC	Leucine aminopeptidase 2, chloroplastic	7B	667092961		50.4874	-1.08689	0.000333595
TraesCS1B01G036900	RING/U-box superfamily protein	1B	17622749		10.5163	-1.08714	0.00479369	7.96821	-2.02522	0.0398528	10.0773	-2.198	4.68886e-06	9.04079	-2.19185	0.000153325
TraesCS3B01G392900LC	TRAF-like superfamily protein	3B	393252270		11.1932	-1.08796	0.0304593	11.4108	-2.22023	0.025747	9.87035	-1.85811	0.004257
TraesCS5D01G523800	F-box family protein	5D	543440779		8.54271	-1.08801	0.0497355
TraesCS1B01G258100LC	Haloacid dehalogenase-like hydrolase superfamily protein	1B	213407336		14.5644	-1.08899	0.0408121				14.049	-1.71471	0.0120358
TraesCS1B01G118100	60S ribosomal protein L28	1B	137871144		27.4391	-1.0899	0.000181976				25.6759	-1.87322	1.72477e-07	23.7571	-1.89986	0.0125234
TraesCS3B01G482600	Avr9/Cf-9 rapidly elicited protein	3B	729704766		3.66657	-1.09015	0.0461339
TraesCS5D01G027800LC	Transposon Ty3-G Gag-Pol polyprotein	5D	15071701		13.8404	-1.09025	0.000535777
TraesCS1B01G182200LC	Guanine nucleotide-binding protein G(o) subunit alpha	1B	121843162		50.447	-1.09071	0.0019618				51.7206	-1.62664	0.000274012
TraesCS1B01G022600	transmembrane protein, putative (DUF594)	1B	10097165		7.95459	-1.09161	0.0499094				8.07708	-2.36102	0.0012646	5.94121	-2.04089	0.0235716
TraesCS6A01G100800	RNA-binding family protein	6A	68511652		18.8741	-1.09344	7.97784e-05				20.4022	-1.03522	6.89824e-05
TraesCS6B01G068900	Serpin-like protein	6B	46653907		11.0648	-1.09352	0.0421525
TraesCS7B01G261100LC	Ta11-like non-LTR retrotransposon	7B	223706107		10.0751	-1.09387	7.51757e-05				10.0701	-1.13934	0.00491525
TraesCS7D01G516700	Chaperone protein dnaJ	7D	616068179		10.5044	-1.09421	0.000494498				10.5066	-1.20786	0.00535369	9.91151	-1.19623	0.0329911
TraesCS1B01G222000LC	Packaging protein 2	1B	163584257		4.63884	-1.09461	0.010061
TraesCS1B01G095800LC	1-phosphatidylinositol-3-phosphate 5-kinase FAB1A	1B	50205459		20.3353	-1.0952	0.000147459				20.2846	-1.4849	0.000286814	19.2976	-1.52153	0.0289855
TraesCS4B01G143500	Xylanase inhibitor protein 1	4B	191079566		4.12258	-1.09528	0.0282581
TraesCS1B01G077500	Patatin	1B	60107415		242.576	-1.09639	0.0019903				227.265	-1.60478	0.00117195
TraesCS7D01G551400	Thaumatin-like protein	7D	634805046		18.3053	-1.09765	0.0179486				16.9964	-1.16007	0.0438645
TraesCS7A01G371000	F-box protein PP2	7A	544286416		6.2096	-1.09999	0.000191618
TraesCS1B01G299300	QWRF motif protein (DUF566)	1B	520374148		6.43267	-1.1012	0.000393569				6.72004	-1.24249	0.00399602
TraesCS3B01G197100	Major facilitator superfamily protein	3B	224279043		54.9743	-1.10232	7.88501e-06	50.8243	-1.73393	0.00208153	51.567	-1.64881	2.57227e-10	47.1955	-1.60309	0.00117599
TraesCS1B01G256300LC	DNA helicase homolog, putative	1B	212420302		20.2558	-1.1026	3.35801e-05	15.9438	-1.92752	0.0387395	19.2324	-2.02513	1.97602e-08	17.8176	-2.08783	0.000357465
TraesCS7B01G689500LC	ATP synthase subunit b	7B	678877881		16.0678	-1.10288	0.0167337
TraesCS1D01G357000LC	COP1-interacting protein 4.1	1D	346185514		7.09317	-1.10317	0.0166233
TraesCS4B01G085100	Transmembrane protein, putative	4B	85581886		34.6071	-1.10386	2.45957e-07				33.3012	-1.28004	2.68095e-05	32.7373	-1.35087	0.0314534
TraesCS3B01G142900	Protein FAR1-RELATED SEQUENCE 3	3B	131573647		11.721	-1.10393	6.44536e-06				11.4936	-1.79686	7.11862e-06	10.268	-1.68486	0.0106186
TraesCS5D01G028000LC	Transposon Ty3-G Gag-Pol polyprotein	5D	15075694		5.0571	-1.10456	0.00739242
TraesCS6A01G377000	Phytosulfokines 1	6A	598520405		62.8042	-1.1048	0.0370261
TraesCS1B01G121000	BTB/POZ domain containing protein, expressed	1B	143053061		19.5155	-1.10602	7.81935e-05				19.2964	-1.93564	2.41528e-09	16.3374	-1.81393	0.0103544
TraesCS1A01G027800	SKP1-like protein 4	1A	13228921		8.02871	-1.10641	0.00609361
TraesCS2A01G390300	F-box family protein	2A	639694016		31.549	-1.10675	0.041906
TraesCS4A01G119700LC	Acetyl-coenzyme A carboxylase carboxyl transferase subunit alpha	4A	137902060		11.9819	-1.1068	4.97578e-05				11.7336	-1.1474	0.00195728	12.9725	-1.38715	0.000816571
TraesCS7A01G433300	F-box family protein	7A	626955784		48.6521	-1.10681	0.0191437				50.2094	-1.42618	0.0146519
TraesCS3B01G313400	Glycosyltransferase	3B	503968621		24.7249	-1.10688	0.0019039	22.1228	-1.56853	0.0116851	24.2383	-1.59545	0.00220516	20.3126	-1.40872	0.00233199
TraesCS5A01G434800LC	NACHT domain- and WD repeat-containing protein 1	5A	512976595		40.7797	-1.1075	4.29883e-06				42.6458	-1.16456	0.000106268	39.0029	-1.08097	0.000325544
TraesCS2B01G122800	Poly (A) RNA polymerase cid14	2B	90348356		5.63839	-1.10796	0.00917848
TraesCS5B01G361800	BTB/POZ domain-containing family protein	5B	541337075		7.53884	-1.10805	0.0433071
TraesCS5B01G092000	Retrovirus-related Pol polyprotein from transposon TNT 1-94	5B	120945781		14.3445	-1.10815	0.0499094
TraesCS5A01G478600LC	Protein kinase superfamily protein	5A	547790168		52.7961	-1.10845	0.0453581				54.5284	-1.56419	0.0036989	57.028	-1.75126	0.000229952
TraesCS6B01G092700LC	Disease resistance protein RGA2	6B	46957268		20.7436	-1.10918	0.00426122				22.782	-1.10238	0.0141843
TraesCS2D01G374000	Yellow stripe-like transporter 12	2D	477393889		17.6373	-1.10998	0.000741102							22.456	-1.57245	0.000147545
TraesCS6B01G256200LC	Major Facilitator Superfamily with SPX (SYG1/Pho81/XPR1) domain-containing protein	6B	176245406		5.52582	-1.11034	0.0323621				5.69767	-1.5104	0.022181
TraesCS7D01G143900LC	5'/3'-nucleotidase SurE	7D	71538041		162.498	-1.11057	4.45992e-06				163.936	-1.39948	8.48682e-07	155.691	-1.40995	0.00604218
TraesCS1B01G217700LC	RNA-directed DNA polymerase (Reverse transcriptase)-related family protein	1B	160122739		11.1115	-1.11132	0.000100286				11.1362	-1.89196	2.70244e-07	9.20211	-1.79753	0.0114368
TraesCS1B01G012800	Pm3-like disease resistance protein	1B	6192938		8.65419	-1.11219	0.0101475				9.03195	-1.48824	0.00352374
TraesCS5B01G142100	NAC domain protein	5B	267777722		77.93	-1.1135	0.000607132	68.7957	-1.17428	0.0385598	73.5946	-1.20187	0.00562524	78.537	-1.39536	0.00827848
TraesCS6B01G069900	NBS-LRR-like resistance protein	6B	46922023		25.2623	-1.11353	0.00851445
TraesCS1B01G060100	E3 UFM1-protein ligase 1-like protein	1B	43449805		81.9812	-1.11433	0.0090375				73.7332	-1.57439	0.0209616
TraesCS6B01G352400LC	protein FLOWERING locus D-like protein	6B	281546325		201.484	-1.11524	0.012946
TraesCS5D01G412400	Maternal effect embryo arrest 14-1	5D	475575130		30.9834	-1.11529	8.90144e-07				30.5277	-1.26115	7.49232e-06	33.4649	-1.50761	6.091e-05
TraesCS7B01G355900	Transmembrane amino acid transporter family protein	7B	616407193		41.0812	-1.11552	5.61075e-08				40.2923	-1.00109	0.000115767
TraesCS7A01G041600	Ozone-responsive stress-related protein	7A	19318681		86.2401	-1.11559	0.0371597
TraesCS4A01G462400	Haloacid dehalogenase-like hydrolase family protein	4A	726511450		11.9636	-1.11593	0.0309005				10.5653	-1.50102	0.013579
TraesCS3D01G005500	3-ketoacyl-CoA thiolase	3D	2147109		154.543	-1.11623	0.00362519	139.77	-1.25511	0.00704576	153.775	-1.31882	0.022995	134.158	-1.1753	0.0275321
TraesCS3B01G020700	PAP fibrillin domain containing protein,expressed	3B	8792814		18.5004	-1.11746	0.00132474	17.1123	-1.39835	0.0190082	16.8616	-1.27327	0.0160988	18.3284	-1.51101	0.00713025
TraesCS1A01G166600	Plant basic secretory family protein	1A	299424944		5.44501	-1.11851	0.0162111
TraesCS1B01G191200LC	Ubiquitin carboxyl-terminal hydrolase 12	1B	133450522		15.7022	-1.11869	9.51025e-05				14.6509	-1.68107	4.95074e-07	14.125	-1.76742	0.011837
TraesCS6A01G241700	Unknown protein	6A	453552713		4.70571	-1.11869	0.0279953
TraesCSU01G075500LC	Keratin, type I cytoskeletal 19	Un	39514400		38.4618	-1.11872	0.000426018				37.5895	-1.98663	3.21018e-07	34.6514	-1.62397	0.032181
TraesCS1B01G060400	Calmodulin binding protein-like protein	1B	43984033		6.38048	-1.11885	0.00535311				5.88223	-2.40518	2.68095e-05	5.73617	-2.54594	0.000933373
TraesCS1B01G256400LC	AT hook motif-containing protein, putative, expressed	1B	212422305		10.55	-1.11913	0.000255603				10.1151	-1.467	0.000249296
TraesCS1B01G017900	U-box domain-containing protein 1	1B	8696272		18.848	-1.11932	5.25869e-07	16.0929	-1.55838	0.0221272	17.4777	-1.55196	6.76942e-07	18.1978	-1.75112	0.00036363
TraesCS2D01G376000	Aquaporin	2D	480179042		549.305	-1.11964	0.000114874	511.932	-1.35444	0.033099	513.173	-1.26568	0.00498516	513.979	-1.61527	5.04972e-07
TraesCS2A01G059600	carboxyl-terminal peptidase (DUF239)	2A	25466399		14.2095	-1.12006	0.00892579							22.517	-1.92977	0.000841207				20.6323	-1.34707	0.0100964	16.6076	-1.24823	0.00704425
TraesCS7B01G554900LC	RAX-like transcription factor RAX1	7B	586239210		66.0605	-1.12128	0.00505506
TraesCS1B01G088900	WRKY transcription factor	1B	87731138		25.6926	-1.12163	0.000102297	20.1566	-1.92618	0.0225153	25.7559	-2.13372	3.34955e-09	19.8466	-1.8889	0.00147326
TraesCS1D01G063700	Protease inhibitor/seed storage/lipid transfer protein family protein	1D	44275304		91.7525	-1.12179	0.0450205							167.674	-1.99813	0.00993839				142.155	-1.84526	0.00418889	110.724	-1.59207	0.0157676
TraesCS1B01G228700LC	glutamate receptor 2.5	1B	172404404		9.74001	-1.12232	0.00019684				9.46058	-1.5167	0.000193462	9.38324	-1.63785	0.0244678
TraesCS6A01G255400	BHLH transcription factor-like protein	6A	473361643		14.3469	-1.12416	0.0137273				14.5436	-1.43374	0.0267994	13.7785	-1.45034	0.0105637
TraesCS1B01G207100LC	Succinyl-CoA:(R)-benzylsuccinate CoA-transferase subunit BbsF	1B	145571813		32.1766	-1.12495	0.000204215				32.2602	-1.79208	1.41109e-05
TraesCS3D01G475700LC	Lethal(3)malignant brain tumor-like protein 3	3D	504064160		5.27499	-1.12503	0.03868
TraesCSU01G081300	Actin-related protein 2/3 complex subunit	Un	74647094		31.2653	-1.12531	0.000173912				31.6002	-1.11869	0.000365026	32.3669	-1.23629	0.00747036
TraesCS2B01G081600LC	RNA-directed DNA polymerase (reverse transcriptase)-related family protein	2B	39204140		5.47967	-1.12561	0.00164522
TraesCS6A01G095300LC	Transposon protein, putative, CACTA, En/Spm sub-class	6A	46136606		9.78182	-1.12599	0.00241529
TraesCS3B01G213800	Aconitate hydratase	3B	253627116		16.4823	-1.126	1.91001e-05	12.2277	-1.63183	0.0113426	16.5734	-2.00245	9.99124e-08	14.0026	-1.8423	0.000819182
TraesCS3A01G531500	Plant invertase/pectin methylesterase inhibitor superfamily protein	3A	744304096		9.65477	-1.12634	0.0215805							14.783	-1.87441	0.00597827				13.1544	-1.48251	0.030118	11.55	-1.07602	0.0423052
TraesCS3D01G456200	F-box family protein	3D	562348086		7.85947	-1.12656	0.0443478	6.95183	-2.50602	0.00822617	7.3426	-2.40796	0.00166581
TraesCS1B01G114300	Glutathione S-transferase	1B	133429771		8.21488	-1.12746	0.000697389				7.22274	-1.42106	0.00315951	8.14486	-1.81313	0.0174619
TraesCS1B01G030700	cDNA clone:J013058P10, full insert sequence	1B	15141443		115.761	-1.12767	0.0119826				112.752	-2.09166	8.05239e-05	98.5494	-2.28804	0.0353404
TraesCS1B01G247600LC	5-formaminoimidazole-4-carboxamide-1-(beta)-D-ribofuranosyl 5'-monophosphate synthetase	1B	197782233		17.5	-1.12855	5.02731e-06				17.227	-1.85574	1.87101e-09	15.054	-1.80558	0.010744
TraesCSU01G075600LC	eukaryotic translation initiation factor 2 beta subunit	Un	39516323		8.84182	-1.13015	0.000771532				8.49742	-1.56872	0.00158984	8.35676	-1.64494	0.0105289
TraesCS2A01G049100	nucleobase-ascorbate transporter 8	2A	19028862		9.86631	-1.13019	0.0125944
TraesCS1A01G223900LC	homolog of X-ray repair cross complementing 3 (XRCC3)	1A	223992417		5.7432	-1.13032	0.0375502
TraesCS1B01G197100LC	hematological/neurological-like protein	1B	135825389		20.2415	-1.13056	8.86298e-06				19.3511	-1.67608	2.2805e-06	17.9074	-1.68248	0.025784
TraesCS1A01G042100	Leucine--tRNA ligase	1A	22816706		13.8053	-1.13174	0.00195804				14.4515	-1.12495	0.0344457	14.9734	-1.26501	0.00546792
TraesCS1B01G081600	NBS-LRR-like resistance protein	1B	63966500		7.98599	-1.13193	0.000220015				7.61946	-1.78548	6.62193e-05	7.32606	-1.84711	0.00351949
TraesCS3B01G021000	Leucine--tRNA ligase	3B	8804355		97.479	-1.13223	9.65883e-05	89.0652	-1.20975	0.0239469	92.9405	-1.19529	0.00333386	94.2453	-1.29883	0.00142323
TraesCS6A01G569100LC	26S protease regulatory subunit-like protein	6A	595916885		5.13652	-1.13549	0.0267253
TraesCS1B01G136600	SH3/FCH domain protein	1B	174601893		26.5938	-1.13552	7.69545e-06				25.397	-1.56546	2.17686e-05
TraesCS6B01G235700	intracellular protein transporter	6B	403187728		40.8497	-1.13788	3.15047e-06				40.765	-1.20145	1.83696e-05	38.4558	-1.17141	0.0192565
TraesCS1B01G055200	MYB transcription factor	1B	37798960		58.7257	-1.1384	0.000281509				56.6803	-1.31593	0.00484092
TraesCS1D01G398100	U-box domain-containing protein	1D	465349615		14.0045	-1.13882	8.86298e-06	15.9079	-1.17343	0.00407022
TraesCS1B01G199700LC	ATPase E1-E2 type family protein / haloacid dehalogenase-like hydrolase family protein	1B	137556858		8.86436	-1.14092	0.0411068				8.39314	-2.42573	0.000434262	8.39265	-2.59496	4.32921e-05
TraesCS2D01G217900LC	Calcium dependent protein kinase	2D	150396100		25.2659	-1.14103	9.66036e-06				24.5952	-1.01033	0.0173232
TraesCS7A01G395600	Cysteine proteinase inhibitor	7A	574090664		7.5932	-1.14238	0.00582631							10.3371	-1.52837	0.00665462				9.78155	-1.05666	0.0240518
TraesCS5B01G499700	Pectin acetylesterase	5B	665993123		7.24821	-1.14413	0.00935554							10.3716	-1.81947	0.00303846				9.60547	-1.25012	0.0175403
TraesCS3D01G017500	UDP-N-acetylmuramate--L-alanine ligase	3D	6009194		51.7065	-1.14426	8.03333e-05				52.9019	-1.07214	0.00687917
TraesCS1D01G019100LC	expansin B3	1D	9281654		7.14754	-1.14443	0.0192758
TraesCS1B01G085600	F-box/LRR-repeat protein	1B	70232219		19.9836	-1.1457	2.0768e-07				19.122	-1.68878	6.09781e-10	18.3625	-1.77792	0.0012651
TraesCS3B01G540900	Essential protein Yae1, N-terminal	3B	779535678		46.5013	-1.14617	4.68601e-07				45.2982	-1.24691	0.000180209
TraesCS4B01G078800	LOB domain-containing protein, putative	4B	75778120		4.21432	-1.14624	0.0483002
TraesCS3A01G062200	Cytochrome P450	3A	37301826		19.6957	-1.147	0.00118996				18.5639	-1.00921	0.0356067	23.1777	-1.45653	0.0122167
TraesCS2B01G600100	Beta-glucosidase, putative	2B	782958293		7.41796	-1.14718	0.0360025
TraesCS1B01G145000	Lachrymatory factor synthase	1B	198486294		10.2126	-1.14771	3.93437e-05				10.4476	-1.41687	0.000263534
TraesCS7B01G449900LC	PPR repeat protein	7B	477779123		12.1907	-1.14837	6.12122e-06	10.5521	-1.08919	0.00550705	12.1722	-1.23786	0.000641565	11.3062	-1.17661	0.00224938
TraesCS1B01G238400	Receptor protein kinase-like	1B	426497631		21.6892	-1.15023	0.000619336				22.965	-1.12595	0.0114019
TraesCS4A01G461800	Disease resistance protein (NBS-LRR class) family	4A	726292465		15.4613	-1.15129	0.016303				14.272	-1.42754	0.0203218
TraesCS3B01G173800	INO80 complex subunit D-like protein	3B	174147697		37.6403	-1.1513	1.80903e-12				37.9151	-1.08785	1.90426e-07	38.697	-1.1847	0.000132026
TraesCS1B01G115400	Programmed cell death protein 2	1B	135932882		33.5703	-1.15141	1.73519e-05				31.8088	-1.78983	2.35144e-06	31.4171	-1.90612	0.0246059
TraesCS6B01G391700LC	pachytene checkpoint-like protein	6B	334868841		20.2286	-1.15272	0.000219697				20.0851	-1.08851	0.0266839
TraesCSU01G105800	Hexosyltransferase	Un	92738494		27.6132	-1.15303	0.000211448				28.6804	-1.06914	0.0261679
TraesCS3B01G530600	Beta-1,3-glucanase	3B	771557906		26.2579	-1.1546	0.04305							42.9585	-1.78322	0.0200169				38.7693	-1.37115	0.0404918
TraesCS6D01G376400	Methionine--tRNA ligase	6D	459083187		28.5886	-1.15528	0.0415129
TraesCS1B01G085000	Kinase family protein	1B	69824186		53.9809	-1.15644	3.57079e-05				51.3593	-1.7113	2.91205e-06	50.9224	-1.82684	0.00860578
TraesCS2D01G026600	Protein kinase family protein	2D	11218166		15.0076	-1.15646	0.0377104
TraesCS1B01G161500LC	Envelope glycoprotein gp63	1B	103272492		28.8179	-1.15683	0.000669398				27.3443	-1.36866	0.00354842
TraesCS1B01G129200	Basic helix-loop-helix transcription factor	1B	159203246		8.62383	-1.15725	0.000243236	7.03433	-1.63265	0.0342728	8.49606	-1.78089	1.206e-05	7.34294	-1.6919	0.00665152
TraesCS4B01G393000	Remorin	4B	667682903		221.843	-1.15787	0.0276761
TraesCS6A01G005700	Rhodanese-related sulfurtransferase	6A	2221022		6.34259	-1.15929	0.0193283
TraesCS6A01G094100	Chlorophyll a-b binding protein, chloroplastic	6A	61400461		4.18352	-1.15943	0.0400259
TraesCS7D01G520400LC	RmlC-like cupins superfamily protein	7D	500103217		5.08995	-1.15964	0.0264456
TraesCS6B01G096900	Pentatricopeptide repeat-containing protein	6B	73159459		14.1327	-1.16225	0.000200542				13.8489	-1.09056	0.0137179
TraesCS5A01G579600LC	Histone-lysine N-methyltransferase	5A	610212697		54.6591	-1.16386	8.19549e-06				56.3779	-1.09727	0.000616694	52.2907	-1.03514	0.0451472
TraesCS1B01G222900LC	Cytochrome c oxidase subunit 3	1B	163774361		4.61559	-1.16414	0.00752104
TraesCS3D01G023000	Glycosyltransferase	3D	7287230		97.1114	-1.16531	2.6221e-05	100.074	-1.23034	0.00827367	93.3274	-1.04044	0.0031106
TraesCS6A01G286400LC	Sushi domain-containing protein 2	6A	233244643		45.3969	-1.16543	4.33895e-05				45.6278	-1.03831	0.0172194	49.6126	-1.24467	0.000421791
TraesCS1B01G356600	Auxin-responsive protein	1B	585539206		10.2598	-1.16604	3.14226e-05				11.0484	-1.14631	0.000261087
TraesCS5A01G454800LC	cobalt ion binding protein	5A	532459914		33.358	-1.16706	4.33377e-05				32.8804	-1.10646	0.0074724	33.5669	-1.21143	0.016154
TraesCS4B01G393300	Lipid transfer protein	4B	667854831		960.006	-1.16748	0.000874777							1251.63	-1.40531	0.00253827
TraesCS4B01G176500LC	Homeodomain-like superfamily protein	4B	172790063		21.5581	-1.16758	0.000982601	17.0395	-1.3575	0.00906694	20.3256	-1.53113	0.000972798	21.912	-1.77027	0.00190948
TraesCS3D01G018200	Pentatricopeptide repeat-containing protein	3D	6146778		21.3902	-1.16797	9.99205e-06				21.4352	-1.01481	0.0101536
TraesCS6D01G282800	Alpha-galactosidase	6D	389980867		8.92615	-1.16865	0.000181544				9.59309	-1.35845	0.000865037	8.02482	-1.12678	0.0405541
TraesCS5A01G139900	Metacaspase	5A	312232086		147.988	-1.1689	5.599e-10	134.415	-1.85637	1.66788e-08	131.02	-1.67819	2.66128e-14	142.897	-1.95019	2.68698e-10
TraesCS1A01G628000LC	Protein FAR1-RELATED SEQUENCE 5	1A	590650430		5.01858	-1.16897	0.00755083
TraesCS2A01G185600LC	LINE-1 reverse transcriptase	2A	133692001		5.51729	-1.16956	0.0465371
TraesCS7B01G058000LC	AT hook motif DNA-binding family protein	7B	34497555		8.55239	-1.16986	0.000339063				7.71851	-1.14966	0.0140669	9.72967	-1.63245	0.00610634
TraesCS1B01G099800	Thioesterase family protein	1B	107152145		12.9921	-1.17072	1.3521e-05	9.739	-1.94333	0.00666545	13.0932	-2.25646	1.42675e-09	10.2475	-2.02298	8.2578e-05
TraesCS7A01G470200	Homeodomain-like superfamily protein	7A	666588167		6.97725	-1.17072	0.00155711
TraesCS3D01G517900	60S ribosomal protein L38	3D	600640261		79.5791	-1.17089	2.0438e-07				76.4133	-1.10198	0.00102392
TraesCS2B01G575800	CC-NBS-LRR family disease resistance protein	2B	765047755		8.26935	-1.17194	0.0441596
TraesCS1D01G000500	transmembrane protein, putative (DUF 3339)	1D	121979		70.2876	-1.17201	0.00733102
TraesCS1B01G124500	Endo-1,4-beta-xylanase	1B	151069375		22.5001	-1.17441	0.00455825							28.4434	-1.95349	0.0242011
TraesCS1B01G100100	Low temperature and salt responsive protein	1B	108209952		67.17	-1.17526	0.000258619				67.0241	-2.33689	1.3726e-10	53.1767	-2.14032	0.0047276
TraesCS3B01G534900	Crossover junction endonuclease mus81	3B	774165159		65.2995	-1.17534	0.00708087				66.4229	-1.43682	0.00163433
TraesCS3B01G563100	Protein DETOXIFICATION	3B	796008218		10.149	-1.17712	0.00997087
TraesCS5A01G548400LC	DEK carboxy-terminal domain protein	5A	591983919		6.11543	-1.17779	0.00731987
TraesCS1B01G092400	Annexin	1B	94225419		3.71879	-1.17793	0.0342388
TraesCS6D01G334600	Protein CSN12 homolog	6D	436493930		10.7165	-1.17847	9.68536e-06	9.29817	-1.42283	0.0300498	10.6606	-1.53647	1.43288e-05	9.20889	-1.39731	0.0248151
TraesCS7B01G598800LC	yeast autophagy-like protein	7B	615740049		13.5657	-1.17925	2.51219e-05							14.9722	-1.18779	0.0066737
TraesCS7D01G080400	Cytochrome P450	7D	47448133		4.95201	-1.1805	0.0338956				4.86413	-2.10653	0.00367681
TraesCS7B01G636000LC	myosin-like protein XIG	7B	644027911		13.4262	-1.1808	0.00433462
TraesCS5A01G131800	Citrate synthase	5A	296724170		15.2738	-1.18111	0.0056688	11.3918	-2.23376	0.00699391	14.122	-2.38431	4.26781e-05	14.1134	-2.48319	1.47019e-10
TraesCSU01G003300	Cellulose synthase-like protein	Un	5434140		8.5345	-1.18195	0.00132474				8.92019	-1.9333	3.19018e-05
TraesCS3B01G297000LC	DNA-directed RNA polymerase subunit	3B	252334698		4.90641	-1.18205	0.0481291				5.31489	-2.44264	0.00113929
TraesCS2D01G578000	carboxyl-terminal peptidase (DUF239)	2D	641064924		13.0801	-1.18274	0.0240569							19.3439	-2.28803	0.0127417
TraesCS1B01G107400	Agmatine coumaroyltransferase-1	1B	119492645		5.37109	-1.18333	0.0130254				5.83741	-1.6367	0.0047175
TraesCS7B01G064600LC	OSBP(oxysterol binding protein)-related protein 2B	7B	40155043		12.3535	-1.18376	0.000354171				11.9893	-1.00645	0.0228387
TraesCS1B01G135400	Mitochondrial carrier family	1B	172378222		20.6187	-1.18469	0.00421992	19.8809	-1.86252	0.0433721	18.8548	-1.63298	0.0028894	17.9393	-1.68328	0.0294011
TraesCS6B01G165600	30S ribosomal protein S11	6B	172325146		16.7277	-1.18702	5.76805e-05				16.2661	-1.18433	0.00492143
TraesCS2B01G478700	MYB-related transcription factor	2B	676023815		13.9851	-1.1872	0.0492464				15.5313	-1.89716	0.00829901
TraesCS4A01G499700	Gag polyprotein	4A	744493187		4.80471	-1.18776	0.0251878
TraesCS1B01G000300	Disease resistance protein (NBS-LRR class) family	1B	711792		5.14677	-1.18921	0.01285				5.28451	-2.17075	0.000680338
TraesCS6B01G436000LC	Cellulose synthase	6B	393593730		70.4256	-1.18934	0.040364
TraesCS6A01G331100	Retrovirus-related Pol polyprotein from transposon TNT 1-94	6A	563384177		68.1694	-1.18964	0.000279589				65.9954	-1.54227	0.000711998	62.2598	-1.5605	0.0105877
TraesCS5A01G682100LC	DNA-directed RNA polymerase subunit beta	5A	672561698		7.64112	-1.19105	0.00348422
TraesCS1B01G451700	receptor kinase 1	1B	668965065		108.447	-1.19124	0.00247865
TraesCS3A01G327700	Fatty acid oxidation complex subunit alpha	3A	572591324		22.534	-1.19166	0.00656264
TraesCS3B01G800300LC	Transposon protein, putative, CACTA, En/Spm sub-class	3B	780544845		7.30781	-1.19212	0.0251553
TraesCS1B01G121700LC	pfkB-like carbohydrate kinase family protein	1B	65543410		34.4197	-1.19228	0.00266288							48.5269	-1.75658	0.021176
TraesCS6A01G376700	Phytosulfokines 1	6A	598252987		46.9752	-1.19288	0.00197127
TraesCS1B01G079800	40S ribosomal protein S15a	1B	62284380		8.55656	-1.19326	0.00369765				6.55773	-1.25888	0.0114632	10.3167	-2.15852	0.0011453
TraesCS5A01G304300	HORMA domain-containing protein 1	5A	512970443		80.0785	-1.19464	1.18083e-07				83.3623	-1.26972	3.9136e-07	78.5589	-1.25321	1.54829e-07
TraesCS2D01G477800LC	alpha/beta-Hydrolases superfamily protein	2D	474645519		5.13783	-1.19476	0.00122917
TraesCS1B01G117500	1-aminocyclopropane-1-carboxylate oxidase	1B	137555535		16.9146	-1.19508	0.00124562				16.7162	-2.20339	2.35656e-06	14.9735	-2.1869	0.00350378
TraesCS2B01G392500	Kunitz trypsin inhibitor	2B	556698149		4.37955	-1.19596	0.0320182
TraesCS1B01G161200LC	Far1-like	1B	103027818		8.12579	-1.19635	0.000252473				7.8856	-1.7253	0.000597384
TraesCS5B01G405300	Peroxidase	5B	580843464		6.65516	-1.19641	0.00741718
TraesCS3B01G598200	Glycosyltransferase	3B	819990269		29.3436	-1.19643	0.0137972
TraesCS3D01G017600	Alpha-ketoglutarate-dependent dioxygenase alkB	3D	6013193		16.269	-1.19665	0.000179797				15.7832	-1.34382	0.000216773	15.1625	-1.37666	0.0150498
TraesCS3D01G132200	F-box family protein	3D	91829864		40.0443	-1.19692	1.60111e-05
TraesCS7A01G752300LC	Retrotransposon protein, putative, unclassified	7A	709118719		14.3364	-1.19781	0.0305443
TraesCS7B01G662800LC	LINE-1 reverse transcriptase like	7B	662526768		10.8075	-1.19819	0.000238049				10.9294	-1.19906	0.0174474
TraesCSU01G105500	Leucine-rich repeat receptor-like protein kinase family protein	Un	92729825		6.61346	-1.19827	0.00237434
TraesCS7A01G536200	Protein MEMO1	7A	713736975		159.308	-1.1991	0.034461
TraesCS6A01G286500LC	Kinase family protein	6A	233247983		43.9711	-1.19998	0.00847181
TraesCSU01G445200LC	Dihydroxy-acid dehydratase	Un	325899666		17.1302	-1.20085	0.00142107	15.6881	-1.36501	0.0134431	16.372	-1.3353	0.0165146	15.8183	-1.37459	0.0416773
TraesCS1B01G145600	Gibberellin 2-oxidase 2	1B	199662828		32.4708	-1.20432	3.09272e-05				32.7409	-1.62382	8.144e-05
TraesCS5A01G196400LC	La-related protein 7	5A	230845745		6.31395	-1.20561	0.033257				6.43275	-2.25403	0.0045076
TraesCS5A01G552900LC	p-loop containing nucleoside triphosphate hydrolases superfamily protein	5A	595917962		6.42932	-1.2065	0.00622425				6.30651	-1.74959	0.0108236
TraesCS1B01G001300LC	Galactose oxidase/kelch repeat superfamily protein	1B	1201322		5.64114	-1.20691	0.0153966				5.52055	-1.90275	0.00460234
TraesCS3D01G458600LC	Transposon Ty3-G Gag-Pol polyprotein	3D	489458706		5.79745	-1.20801	0.000712582				6.31835	-1.35388	0.0041676
TraesCS1B01G137600LC	meiosis chromosome segregation family protein	1B	82305310		7.26179	-1.20971	0.00626598				7.20975	-2.31229	0.00015132	5.71288	-2.13145	0.0130754
TraesCS6B01G039300LC	Protein ApaG	6B	18647593		20.9623	-1.21022	1.11401e-05				20.9152	-1.0853	0.00444149
TraesCS6B01G668700LC	Argininosuccinate lyase	6B	641880999		22.6204	-1.21035	0.000277654	21.871	-1.68618	0.00231192	21.0127	-1.50558	0.000338229	19.9594	-1.52748	0.0250872
TraesCS3D01G454700	Protein FAR1-RELATED SEQUENCE 3	3D	561029063		6.28839	-1.21223	0.00209336
TraesCS6A01G423800LC	Gag polyprotein	6A	461147649		5.93608	-1.21273	0.000270359				6.04908	-1.46563	0.00231064
TraesCS5A01G098900	Auxin-binding protein	5A	141025530		17.0391	-1.21279	6.27276e-05	11.8644	-3.39423	1.6933e-09	15.9372	-3.57477	1.30573e-16	14.1088	-3.61458	6.33723e-15
TraesCS3B01G548700	Myb/SANT-like DNA-binding domain protein	3B	784060966		101.654	-1.21399	3.14381e-05				100.592	-1.22659	0.00480338
TraesCS5A01G579700LC	Histone-lysine N-methyltransferase	5A	610215036		74.1653	-1.21525	6.06218e-06				75.5004	-1.12595	0.000603999	72.9403	-1.13836	0.0101885
TraesCS7B01G261200LC	Endonuclease/exonuclease/phosphatase family protein	7B	223707586		9.63744	-1.21546	2.06497e-05				9.44404	-1.02544	0.00825186
TraesCS1B01G165300LC	Protein FAR1-RELATED SEQUENCE 5	1B	107523761		12.5866	-1.21571	0.00453581				12.7753	-1.75328	0.00103829
TraesCS5A01G114700	NAD-dependent protein deacylase	5A	229763693		25.1144	-1.21598	0.0110333				27.5308	-1.46997	0.0300173
TraesCS1B01G161400LC	Transcription initiation factor IIA subunit 2	1B	103216954		9.59178	-1.21625	1.63601e-05				8.83674	-1.84177	1.91516e-06	8.76972	-1.99143	0.000156093
TraesCS6B01G092600LC	BRCA1-A complex subunit Abraxas	6B	46956712		4.79875	-1.21777	0.0153704
TraesCS2D01G478300	Phosphatidylinositol-4-phosphate 5-kinase, putative	2D	579756890		16.9651	-1.2192	0.000296855
TraesCS6A01G490200LC	Beta-xylosidase, putative	6A	535896287		14.3646	-1.21977	0.00111881				14.4253	-1.09769	0.0406381
TraesCS5B01G454300LC	Adenosylhomocysteinase	5B	473086176		8.52013	-1.21987	0.0472382
TraesCS1B01G097900	Histone H4	1B	104481182		15.7301	-1.22078	0.00104872				12.9594	-1.39196	0.000798129
TraesCS1B01G074300	30S ribosomal protein S4	1B	57712409		47.2215	-1.22241	0.000166684				49.1277	-1.84011	2.05172e-05
TraesCS7D01G010700LC	Lactoylglutathione lyase	7D	3849786		9.21551	-1.22538	0.0334803
TraesCS7A01G536400	ARM repeat superfamily protein	7A	713755702		33.1309	-1.22605	0.00681483
TraesCS3D01G018800	Peroxisomal membrane protein PEX14	3D	6339982		184.621	-1.22616	4.12219e-06				188.197	-1.15938	0.00111405
TraesCS5B01G300900LC	Translation initiation factor IF-2	5B	330233322		8.58472	-1.22619	1.57088e-05	8.66406	-1.52565	0.016012	8.24374	-1.32187	0.000791148	7.13654	-1.18458	0.0228171
TraesCS7B01G409900	2-oxoglutarate (2OG) and Fe(II)-dependent oxygenase superfamily protein	7B	678896814		29.3118	-1.22752	0.0172061
TraesCS5B01G379700	Protein recA	5B	557802160		39.9971	-1.22875	1.99549e-09	35.8011	-1.00804	0.033609	40.0751	-1.13075	4.84209e-05	38.0099	-1.10655	0.00409686
TraesCS1B01G115900LC	Patatin	1B	60456788		11.2196	-1.22959	0.0379971				11.1829	-1.92883	0.00534761
TraesCS6A01G300600	Phospholipid--sterol O-acyltransferase	6A	533406903		29.0817	-1.2298	0.00647617
TraesCS1B01G131200LC	Retrotransposon protein, putative, Ty3-gypsy subclass	1B	72979698		25.5088	-1.23	6.35362e-05				25.0802	-1.97768	1.77884e-07	22.1125	-1.94176	0.0118789
TraesCS2B01G363100LC	Pentatricopeptide repeat-containing protein, chloroplastic	2B	296476851		13.3339	-1.23012	1.39168e-06				13.6509	-1.30929	0.000633121
TraesCS3B01G096500	Light-regulated protein	3B	64508600		43.0343	-1.23096	1.89973e-09				44.143	-1.26262	2.08478e-06	44.5403	-1.36626	6.45954e-07
TraesCS4A01G450700	Retrovirus-related Pol polyprotein from transposon TNT 1-94	4A	715995086		4.03143	-1.23107	0.0130254
TraesCS1B01G115800	Peroxidase	1B	136167711		11.903	-1.23327	0.00771731				11.4866	-1.64993	0.00670906
TraesCS5D01G648200LC	DNA polymerase epsilon catalytic subunit A	5D	557596847		6.71936	-1.23427	0.00656264				6.50096	-1.4516	0.0141658	6.43647	-1.52165	0.00955766
TraesCS6D01G246800LC	Indole-3-glycerol phosphate synthase	6D	203020769		4.16296	-1.23432	0.0262929
TraesCS5A01G169700LC	Retrotransposon protein, putative, LINE subclass	5A	174572505		9.8019	-1.23508	0.0464589				8.7365	-1.90366	0.0370923	9.877	-2.23309	0.0114597
TraesCS6B01G091700LC	Ribonuclease H-like superfamily protein	6B	46771036		6.65476	-1.23642	0.00188418
TraesCS3D01G017300	E3 ubiquitin-protein ligase	3D	5869809		34.4019	-1.23664	2.36414e-05				33.8625	-1.19278	0.00237048
TraesCS1B01G130500LC	agenet domain protein (DOMAIN OF UNKNOWN FUNCTION 724 6)	1B	71619980		37.4663	-1.23741	0.0115432				35.8486	-2.12973	9.55151e-05	32.8339	-2.26588	0.0195687
TraesCS7B01G638000LC	Dehydrogenase/reductase	7B	644535186		13.3605	-1.23743	0.000497211							13.7223	-1.21653	0.00355366
TraesCS7A01G495400	Homogentisate phytyltransferase	7A	685581321		95.772	-1.2397	0.000139176				94.7516	-1.32577	0.00966437
TraesCS6D01G117400LC	Polynucleotidyl transferase, ribonuclease H-like superfamily protein	6D	63930101		8.08932	-1.23983	6.96964e-05							8.0547	-1.15535	0.0380676
TraesCS1B01G005300	Hydroxycinnamoyl-CoA shikimate/quinate hydroxycinnamoyltransferase	1B	3269194		137.83	-1.23987	0.0139763				126.797	-1.5943	0.0229671
TraesCS3D01G510700	Polyubiquitin	3D	595677454		4.76412	-1.24044	0.0102673
TraesCS1B01G142300LC	phospholipase D delta	1B	86775024		13.336	-1.24072	3.89817e-06				13.0344	-1.51284	0.000118358
TraesCS4A01G363600LC	E3 ubiquitin-protein ligase SINA-like 10	4A	521571599		14.9175	-1.24215	0.00135653							16.7359	-1.17567	0.0275083
TraesCS1A01G430200	ATP-dependent zinc metalloprotease FtsH	1A	582861748		19.3482	-1.24352	0.00331758				17.7183	-1.22545	0.0317847
TraesCS2D01G339900	BTB/POZ and TAZ domain protein	2D	434138339		3.55404	-1.244	0.0418738
TraesCS4D01G195100	Asparagine synthetase	4D	338823036		76.7272	-1.24517	0.0247425
TraesCS6D01G329200LC	PQ-loop repeat family protein / transmembrane family protein	6D	318566978		10.7728	-1.24564	0.000510724
TraesCS6D01G405900	Callose synthase	6D	472787798		13.747	-1.24647	0.0373456
TraesCS7B01G064500LC	Serine/threonine-protein phosphatase 2A 56 kDa regulatory subunit beta isoform	7B	40154577		7.07479	-1.24652	0.000785769				6.6299	-1.1047	0.024782
TraesCS2A01G546600	Cytochrome P450 family protein, expressed	2A	755335638		20.0984	-1.24751	0.0324791													23.1623	-1.55443	0.0139081
TraesCS4A01G691100LC	Disease resistance protein (NBS-LRR class) family	4A	726118929		70.1368	-1.24762	0.00404333
TraesCS3D01G018300	E3 ubiquitin-protein ligase	3D	6167259		15.6269	-1.24767	0.000278724				15.1845	-1.26857	0.00448675
TraesCS2D01G004500	Disease resistance protein (NBS-LRR class) family	2D	2538169		14.1814	-1.24777	0.0344732							19.5824	-2.13241	0.00204323
TraesCS6B01G142600	Disease resistance protein (NBS-LRR class) family	6B	142449932		13.5354	-1.24844	0.0291726							15.7961	-1.88716	0.0305383
TraesCS6D01G178500	Ketol-acid reductoisomerase (NADP(+))	6D	186976286		89.3219	-1.24872	2.47264e-07							90.4683	-1.05778	0.0140693
TraesCS1B01G098000	Germin-like protein 1	1B	104720911		7.01549	-1.24903	0.000211698				6.25435	-1.86014	0.000186695	7.42286	-2.30531	7.51525e-05
TraesCS1B01G236200LC	P-loop containing nucleoside triphosphate hydrolases superfamily protein	1B	182199628		4.8629	-1.24937	0.00132189
TraesCS2A01G572900	Disease resistance protein	2A	768729674		15.9546	-1.24983	0.0422819
TraesCS3B01G201600LC	Retrovirus-related Pol polyprotein from transposon TNT 1-94	3B	141746862		6.19073	-1.25074	0.000446419				5.99076	-1.65719	0.00232514
TraesCS1B01G248800LC	cyclic nucleotide-gated channel 12	1B	198555790		5.18317	-1.25251	0.0346956
TraesCS2A01G188500	Homeobox leucine zipper protein	2A	153452267		36.9931	-1.25293	0.00972967				33.6492	-1.43845	0.0314504	38.7267	-1.77822	0.00982934
TraesCS6A01G374400	Photosystem II 10 kDa polypeptide family protein	6A	597284908		61.5745	-1.25474	0.00156536				64.017	-1.38575	0.0126603	70.9755	-1.65767	0.00373947				63.8718	-1.33653	0.00769945
TraesCS2D01G280400LC	Reverse transcriptase	2D	243121037		12.9125	-1.25515	4.5671e-05
TraesCS1B01G055600	TOX high mobility group box protein, putative (DUF1635)	1B	38224949		11.6211	-1.25738	9.59999e-07	8.93096	-1.78988	0.0053697	11.3996	-2.02762	3.63376e-08	10.1814	-1.99303	3.97444e-07
TraesCS3D01G013000	Sucrose phosphate synthase	3D	4486022		300.678	-1.25784	7.38256e-05				304.86	-1.21441	0.00788531	273.074	-1.10313	0.00546017
TraesCS2D01G008200LC	Defensin	2D	5201901		4.97257	-1.25835	0.0307012							8.58418	-2.19825	0.00257357				8.0323	-1.38248	0.013919	5.74185	-1.59129	0.00277238
TraesCS1B01G113100	Transcription factor basic helix-loop-helix	1B	131775570		5.41079	-1.25847	0.008207				5.40015	-1.61984	0.010771
TraesCS5A01G191800LC	BED zinc finger,hAT family dimerization domain	5A	223051323		72.0351	-1.2585	3.49116e-05	57.0304	-2.38802	2.23384e-09	66.0867	-2.25259	1.6268e-08	66.1485	-2.49148	6.95801e-13
TraesCS6B01G372900	3-ketoacyl-CoA synthase	6B	646240356		34.672	-1.26008	0.00536597
TraesCS2B01G615900LC	Protein FAR1-RELATED SEQUENCE 5	2B	573721302		13.1128	-1.26038	0.0104104				13.565	-2.21761	8.68476e-06	10.797	-2.02996	0.0120199
TraesCS3D01G171200LC	Multiprotein-bridging factor, putative	3D	117507548		17.3041	-1.26188	0.012645
TraesCS6A01G317700	Glycosyltransferase	6A	553925932		30.2919	-1.26407	0.000281167				30.371	-1.09587	0.0233513
TraesCS6A01G217000	Octicosapeptide/Phox/Bem1p domain-containing family protein	6A	399698378		18.4086	-1.26681	1.48367e-09				17.8324	-1.20276	5.25756e-06	20.128	-1.50378	3.45931e-07
TraesCS1B01G198100LC	Replication protein A 70 kDa DNA-binding subunit	1B	136628319		9.44528	-1.26791	6.13755e-05	7.70784	-2.22622	0.00784636	8.3868	-2.15403	4.33825e-07	9.17311	-2.49084	9.58165e-05
TraesCS7D01G529500	Dirigent protein	7D	624776086		9.98964	-1.26797	0.0405791
TraesCS5A01G668500LC	DNA ligase	5A	666228151		4.22474	-1.26896	0.0310572
TraesCS5A01G105400LC	Retrovirus-related Pol polyprotein from transposon TNT 1-94	5A	77338937		15.658	-1.26925	0.00105921	10.3442	-3.22066	0.0143498	15.5789	-3.05173	5.83386e-12	12.0057	-3.39977	5.64671e-08
TraesCS2B01G404000	Vacuolar-processing enzyme	2B	572177725		6.31976	-1.27056	0.00741718							9.54393	-1.62388	0.0177193							7.24405	-1.11106	0.0331041
TraesCS3D01G015600	E3 ubiquitin-protein ligase	3D	5601665		8.26979	-1.27196	0.0339875				8.1408	-1.60955	0.0418636
TraesCS1B01G142500	Avr9/Cf-9 rapidly elicited protein	1B	192224892		5.6868	-1.27254	0.00065094				6.06327	-1.61686	0.00227192
TraesCS6A01G373600	F-box and associated interaction domains-containing protein	6A	596775913		8.91042	-1.27277	6.52286e-06				8.69725	-1.0573	0.0100444
TraesCS5D01G501900	Plant regulator RWP-RK family protein, putative	5D	529548098		5.94374	-1.27439	0.00225791
TraesCS1B01G159900LC	INO80 complex subunit E	1B	101246566		37.1174	-1.27513	7.90771e-07				36.9931	-1.75438	7.07342e-07	31.7218	-1.63769	0.0108754
TraesCS6A01G376600	target of early activation tagged (EAT) 2	6A	598210939		62.2369	-1.27534	0.000848084
TraesCS3D01G017400LC	Peptidase T	3D	7405997		14.7873	-1.2758	0.000129224				15.2502	-1.17331	0.0052507
TraesCS7A01G383400LC	Protein FAR1-RELATED SEQUENCE 3	7A	321658122		13.0123	-1.27756	0.00976656				12.3857	-1.82325	0.0115396	12.0824	-1.91712	0.0452254
TraesCS6B01G540600LC	multiple organellar RNA editing factor	6B	518599601		8.95895	-1.27916	0.000258749				8.68323	-1.04218	0.0377593
TraesCS1D01G085700LC	Methylthioribose-1-phosphate isomerase	1D	50892485		6.27161	-1.27989	0.000575877				6.19568	-1.36732	0.00655484	6.21261	-1.47979	0.0471403
TraesCS7D01G405600LC	3-isopropylmalate dehydratase small subunit 1	7D	366725430		6.95289	-1.28076	0.0072935	6.06012	-2.12906	0.0360931	6.72818	-2.108	0.00211921	5.38805	-1.90659	0.0110244
TraesCS7B01G147500LC	E3 ubiquitin-protein ligase ORTHRUS 2	7B	104510833		25.1325	-1.28208	9.03743e-06				25.8058	-1.46905	0.000279727
TraesCS3D01G492600LC	Nodulin-like / Major Facilitator Superfamily protein	3D	519953410		97.3423	-1.28244	0.0226067
TraesCS6A01G284100	low-molecular-weight cysteine-rich 56	6A	515289429		9.12106	-1.28268	0.0441258							16.9465	-2.29576	0.017821				13.981	-2.17173	0.00299585	11.411	-1.5924	0.0105315
TraesCS1B01G121600	Glucan 1,3-beta-glucosidase	1B	144925966		100.1	-1.28328	0.000659866				105.346	-1.77555	0.00132895
TraesCS5A01G542500	Phosphoglycerate mutase family protein	5A	698502229		17.4746	-1.28444	8.28907e-10	17.1441	-1.10173	0.0279538	17.1309	-1.01655	0.000261064	16.4554	-1.01801	0.0162115
TraesCS7A01G525700	Glutathione S-transferase	7A	708115086		3.81131	-1.28552	0.0438624
TraesCS3B01G225700	Retrovirus-related Pol polyprotein from transposon TNT 1-94	3B	311761313		15.9233	-1.28584	0.00742332	13.4197	-2.40607	0.0464513	15.0174	-2.45352	1.88533e-05	13.0679	-2.35712	0.0217708
TraesCS1B01G158600LC	kinesin like protein for actin based chloroplast movement 2	1B	100308785		7.80574	-1.28628	0.000131991	5.74129	-1.96101	0.0250845	7.25568	-2.15208	2.9714e-05	7.62609	-2.40315	4.67971e-05
TraesCS4A01G344900	Prohibitin	4A	624614705		14.3242	-1.28749	0.00690897	16.7562	-2.22902	0.0496065	12.4752	-1.61774	0.0034109
TraesCS1D01G162700LC	THO complex subunit 2	1D	115024367		10.4049	-1.28781	0.0213934
TraesCS1B01G416400LC	Retrovirus-related Pol polyprotein from transposon TNT 1-94	1B	400296933		6.15676	-1.28863	0.000301406				6.35607	-1.37161	0.0066485
TraesCS7B01G462200	Chalcone synthase	7B	719117921		13.9054	-1.28904	0.0475525
TraesCS4A01G461600	Ribosomal protein L5	4A	726111948		58.9394	-1.28975	9.34755e-05				57.0673	-1.19956	0.0252897	55.9276	-1.24316	0.0202669
TraesCS7B01G605600LC	S-adenosylmethionine synthase	7B	621458894		40.782	-1.28975	0.0249432
TraesCS7B01G109000LC	zinc finger MYM-type-like protein	7B	69988535		13.3539	-1.29038	1.21741e-06				13.1619	-1.3209	0.000382003	13.455	-1.45671	0.000149499
TraesCSU01G093300	UDP-glycosyltransferase	Un	82568509		25.3972	-1.29066	0.000371297				24.6582	-1.21357	0.0242147
TraesCS7B01G433300	Protein OS-9	7B	700813904		112.199	-1.29071	0.000340838	133.838	-1.69459	0.000256516	98.1604	-1.08836	0.0394102	98.0677	-1.15381	0.0475443
TraesCS5A01G522400	Cobyric acid synthase	5A	683374602		7.42086	-1.29076	0.0108361
[truncated: 2,644 more rows]
